# Supplementary material for: Computational Analysis and Mapping of Novel Open Reading Frames in Influenza A Viruses
Source: PubMed Central journal article supplement (PMC4266615; doi:10.1371/journal.pone.0115016), 2014-12-15
Supplement: pone.0115016.s001.pdf [file pone.0115016.s001.pdf]

**Tables S1–S39. Length and count data for influenza A putative ORFs accompanying Figs. 1a and 1b, and Supporting Figures S1–S37.** ORFs are listed according to their start codon positions in nt in their corresponding transcript. For an ORF of various lengths, multiple entries are displayed, ordered by the sequence counts per ORF length. For example, in Table S1, ORFs starting at position 5 are grouped into 4 rows containing 19 148 sequences of 8 aa, 16 sequences of 16 aa, 13 sequences of 5 aa and 3 sequences of 3 aa in length.

**Tables S1. Length and count data for influenza A putative ORFs accompanying Fig. 1a (PB1).**

| <b>Position</b> | <b>Kozak</b> | <b>Frame</b> | <b>Length</b> | <b>Count</b> |
|-----------------|--------------|--------------|---------------|--------------|
| 1               | W            | 1            | 757           | 19378        |
| 5               | W            | 2            | 8             | 19148        |
| 5               | W            | 2            | 16            | 16           |
| 5               | W            | 2            | 5             | 13           |
| 5               | W            | 2            | 3             | 3            |
| 47              | M            | 2            | 2             | 19260        |
| 47              | M            | 2            | 106           | 12           |
| 47              | M            | 2            | 73            | 7            |
| 47              | M            | 2            | 95            | 6            |
| 47              | S            | 2            | 2             | 3            |
| 47              | W            | 2            | 2             | 2            |
| 47              | M            | 2            | 50            | 1            |
| 95              | S            | 2            | 90            | 12241        |
| 95              | S            | 2            | 11            | 4730         |
| 95              | S            | 2            | 57            | 1421         |
| 95              | S            | 2            | 87            | 223          |
| 95              | S            | 2            | 79            | 217          |
| 95              | S            | 2            | 34            | 155          |
| 95              | S            | 2            | 81            | 71           |
| 95              | S            | 2            | 25            | 65           |
| 95              | S            | 2            | 101           | 48           |
| 95              | S            | 2            | 37            | 44           |
| 95              | S            | 2            | 8             | 39           |
| 95              | S            | 2            | 63            | 30           |
| 95              | S            | 2            | 24            | 18           |
| 95              | S            | 2            | 43            | 8            |
| 95              | S            | 2            | 27            | 6            |
| 95              | S            | 2            | 78            | 6            |
| 95              | S            | 2            | 59            | 5            |
| 95              | S            | 2            | 76            | 4            |
| 95              | S            | 2            | 60            | 2            |
| 95              | S            | 2            | 71            | 1            |
| 95              | S            | 2            | 18            | 1            |
| 95              | S            | 2            | 56            | 1            |
| 95              | S            | 2            | 72            | 1            |
| 95              | S            | 2            | 28            | 1            |
| 95              | S            | 2            | 13            | 1            |
| 118             | S            | 1            | 718           | 19314        |
| 118             | M            | 1            | 718           | 4            |

|     |   |   |    |       |
|-----|---|---|----|-------|
| 162 | S | 3 | 12 | 3912  |
| 162 | S | 3 | 15 | 3617  |
| 162 | S | 3 | 5  | 478   |
| 162 | S | 3 | 20 | 160   |
| 162 | S | 3 | 7  | 139   |
| 162 | S | 3 | 23 | 54    |
| 162 | S | 3 | 3  | 28    |
| 162 | S | 3 | 2  | 24    |
| 162 | S | 3 | 22 | 8     |
| 162 | M | 3 | 5  | 5     |
| 162 | M | 3 | 12 | 4     |
| 162 | S | 3 | 35 | 4     |
| 162 | M | 3 | 15 | 2     |
| 209 | M | 2 | 52 | 11140 |
| 209 | M | 2 | 19 | 5835  |
| 209 | M | 2 | 49 | 235   |
| 209 | M | 2 | 41 | 222   |
| 209 | M | 2 | 43 | 71    |
| 209 | M | 2 | 63 | 40    |
| 209 | M | 2 | 25 | 39    |
| 209 | M | 2 | 5  | 8     |
| 209 | M | 2 | 40 | 6     |
| 209 | M | 2 | 21 | 5     |
| 209 | M | 2 | 22 | 4     |
| 209 | M | 2 | 38 | 4     |
| 209 | M | 2 | 34 | 1     |
| 209 | M | 2 | 3  | 1     |
| 209 | S | 2 | 52 | 1     |
| 209 | M | 2 | 18 | 1     |
| 209 | M | 2 | 33 | 1     |
| 230 | M | 2 | 45 | 11508 |
| 230 | M | 2 | 12 | 5758  |
| 230 | M | 2 | 42 | 249   |
| 230 | M | 2 | 34 | 219   |
| 230 | M | 2 | 36 | 70    |
| 230 | M | 2 | 56 | 44    |
| 230 | M | 2 | 18 | 38    |
| 230 | M | 2 | 15 | 5     |
| 230 | M | 2 | 14 | 5     |
| 230 | M | 2 | 31 | 4     |
| 230 | M | 2 | 33 | 2     |
| 230 | S | 2 | 45 | 2     |
| 230 | M | 2 | 11 | 1     |

|     |   |   |     |       |
|-----|---|---|-----|-------|
| 230 | M | 2 | 26  | 1     |
| 245 | M | 2 | 40  | 12169 |
| 245 | M | 2 | 7   | 5840  |
| 245 | M | 2 | 37  | 242   |
| 245 | M | 2 | 29  | 141   |
| 245 | M | 2 | 51  | 48    |
| 245 | M | 2 | 13  | 38    |
| 245 | M | 2 | 31  | 11    |
| 245 | M | 2 | 28  | 6     |
| 245 | M | 2 | 10  | 5     |
| 245 | M | 2 | 9   | 5     |
| 245 | M | 2 | 26  | 3     |
| 245 | S | 2 | 40  | 2     |
| 245 | M | 2 | 6   | 1     |
| 245 | S | 2 | 7   | 1     |
| 245 | M | 2 | 22  | 1     |
| 245 | M | 2 | 21  | 1     |
| 274 | S | 1 | 666 | 19358 |
| 274 | M | 1 | 666 | 10    |
| 318 | W | 3 | 2   | 10107 |
| 318 | W | 3 | 14  | 70    |
| 318 | W | 3 | 23  | 38    |
| 318 | W | 3 | 28  | 4     |
| 331 | S | 1 | 647 | 19080 |
| 331 | M | 1 | 647 | 2     |
| 386 | W | 2 | 4   | 18284 |
| 386 | W | 2 | 18  | 6     |
| 386 | W | 2 | 14  | 2     |
| 458 | M | 2 | 2   | 8331  |
| 458 | W | 2 | 2   | 267   |
| 458 | M | 2 | 10  | 206   |
| 458 | M | 2 | 11  | 55    |
| 458 | M | 2 | 3   | 25    |
| 458 | M | 2 | 14  | 1     |
| 473 | W | 2 | 5   | 18308 |
| 473 | W | 2 | 6   | 114   |
| 473 | M | 2 | 5   | 48    |
| 473 | W | 2 | 12  | 6     |
| 473 | W | 2 | 9   | 1     |
| 506 | M | 2 | 12  | 505   |
| 506 | M | 2 | 13  | 270   |
| 506 | M | 2 | 5   | 159   |
| 506 | M | 2 | 10  | 21    |

|     |   |   |     |       |
|-----|---|---|-----|-------|
| 506 | M | 2 | 22  | 17    |
| 506 | M | 2 | 2   | 13    |
| 506 | S | 2 | 12  | 1     |
| 511 | S | 1 | 587 | 18821 |
| 511 | M | 1 | 587 | 32    |
| 520 | M | 1 | 584 | 14183 |
| 520 | W | 1 | 584 | 4999  |
| 520 | S | 1 | 584 | 2     |
| 535 | S | 1 | 579 | 11147 |
| 535 | M | 1 | 579 | 8     |
| 583 | M | 1 | 563 | 17822 |
| 583 | W | 1 | 563 | 5     |
| 595 | S | 1 | 559 | 18810 |
| 595 | M | 1 | 559 | 554   |
| 679 | M | 1 | 531 | 19371 |
| 679 | S | 1 | 531 | 3     |
| 679 | W | 1 | 531 | 2     |
| 689 | M | 2 | 6   | 14317 |
| 689 | M | 2 | 28  | 8     |
| 689 | S | 2 | 6   | 3     |
| 689 | M | 2 | 25  | 1     |
| 689 | M | 2 | 18  | 1     |
| 689 | W | 2 | 6   | 1     |
| 736 | M | 1 | 512 | 19373 |
| 827 | M | 2 | 10  | 16297 |
| 827 | M | 2 | 6   | 1513  |
| 827 | M | 2 | 13  | 505   |
| 827 | M | 2 | 9   | 156   |
| 827 | M | 2 | 7   | 2     |
| 827 | S | 2 | 10  | 1     |
| 851 | W | 2 | 2   | 16555 |
| 851 | W | 2 | 5   | 498   |
| 851 | M | 2 | 2   | 4     |
| 865 | M | 1 | 469 | 19374 |
| 865 | S | 1 | 469 | 2     |
| 865 | W | 1 | 469 | 1     |
| 868 | M | 1 | 468 | 19340 |
| 868 | S | 1 | 468 | 28    |
| 924 | M | 3 | 2   | 8328  |
| 924 | S | 3 | 7   | 1254  |
| 924 | M | 3 | 7   | 743   |
| 924 | S | 3 | 2   | 418   |
| 924 | M | 3 | 22  | 102   |

|      |   |   |     |       |
|------|---|---|-----|-------|
| 924  | M | 3 | 25  | 48    |
| 924  | M | 3 | 49  | 25    |
| 924  | M | 3 | 38  | 19    |
| 924  | M | 3 | 41  | 2     |
| 924  | S | 3 | 22  | 1     |
| 924  | M | 3 | 51  | 1     |
| 924  | S | 3 | 41  | 1     |
| 924  | M | 3 | 56  | 1     |
| 929  | M | 2 | 11  | 15757 |
| 929  | M | 2 | 9   | 1382  |
| 929  | M | 2 | 12  | 9     |
| 929  | M | 2 | 27  | 9     |
| 929  | M | 2 | 10  | 3     |
| 929  | W | 2 | 9   | 1     |
| 929  | M | 2 | 7   | 1     |
| 949  | W | 1 | 441 | 10936 |
| 949  | M | 1 | 441 | 7643  |
| 961  | M | 1 | 437 | 19341 |
| 961  | S | 1 | 437 | 27    |
| 961  | W | 1 | 437 | 4     |
| 993  | M | 3 | 2   | 5707  |
| 993  | M | 3 | 21  | 1230  |
| 993  | S | 3 | 28  | 1168  |
| 993  | M | 3 | 28  | 717   |
| 993  | M | 3 | 15  | 354   |
| 993  | S | 3 | 2   | 290   |
| 993  | M | 3 | 18  | 289   |
| 993  | M | 3 | 26  | 174   |
| 993  | S | 3 | 15  | 140   |
| 993  | M | 3 | 45  | 136   |
| 993  | S | 3 | 45  | 57    |
| 993  | M | 3 | 42  | 38    |
| 993  | S | 3 | 26  | 34    |
| 993  | M | 3 | 39  | 8     |
| 993  | S | 3 | 18  | 8     |
| 993  | M | 3 | 14  | 4     |
| 993  | S | 3 | 21  | 3     |
| 993  | M | 3 | 33  | 1     |
| 993  | M | 3 | 51  | 1     |
| 993  | M | 3 | 6   | 1     |
| 1004 | M | 2 | 2   | 8047  |
| 1004 | M | 2 | 7   | 1     |
| 1004 | M | 2 | 4   | 1     |

|      |   |   |     |       |
|------|---|---|-----|-------|
| 1004 | W | 2 | 2   | 1     |
| 1015 | S | 1 | 419 | 5152  |
| 1027 | M | 1 | 415 | 19368 |
| 1027 | W | 1 | 415 | 5     |
| 1042 | S | 1 | 410 | 19288 |
| 1042 | M | 1 | 410 | 5     |
| 1066 | W | 1 | 402 | 19373 |
| 1066 | M | 1 | 402 | 1     |
| 1084 | M | 1 | 396 | 19364 |
| 1084 | W | 1 | 396 | 1     |
| 1114 | M | 1 | 386 | 19114 |
| 1114 | W | 1 | 386 | 1     |
| 1145 | W | 2 | 10  | 9941  |
| 1145 | W | 2 | 7   | 4780  |
| 1145 | W | 2 | 14  | 1719  |
| 1145 | W | 2 | 2   | 1202  |
| 1145 | W | 2 | 21  | 103   |
| 1145 | M | 2 | 10  | 9     |
| 1145 | W | 2 | 5   | 5     |
| 1145 | M | 2 | 7   | 2     |
| 1145 | M | 2 | 14  | 2     |
| 1145 | M | 2 | 2   | 2     |
| 1145 | W | 2 | 15  | 2     |
| 1145 | W | 2 | 8   | 1     |
| 1145 | W | 2 | 25  | 1     |
| 1145 | W | 2 | 9   | 1     |
| 1193 | M | 2 | 5   | 17728 |
| 1193 | W | 2 | 5   | 9     |
| 1193 | M | 2 | 9   | 2     |
| 1193 | S | 2 | 5   | 2     |
| 1219 | M | 1 | 351 | 19370 |
| 1219 | W | 1 | 351 | 1     |
| 1222 | M | 1 | 350 | 19372 |
| 1222 | W | 1 | 350 | 1     |
| 1225 | S | 1 | 349 | 19372 |
| 1225 | M | 1 | 349 | 2     |
| 1231 | M | 1 | 347 | 19373 |
| 1240 | M | 1 | 344 | 19371 |
| 1240 | W | 1 | 344 | 1     |
| 1316 | S | 2 | 11  | 9995  |
| 1316 | S | 2 | 10  | 1589  |
| 1316 | S | 2 | 12  | 42    |
| 1316 | S | 2 | 24  | 2     |

|      |   |   |     |       |
|------|---|---|-----|-------|
| 1334 | W | 2 | 5   | 7788  |
| 1334 | W | 2 | 4   | 1937  |
| 1334 | W | 2 | 6   | 1294  |
| 1334 | W | 2 | 18  | 36    |
| 1334 | W | 2 | 27  | 6     |
| 1355 | W | 2 | 20  | 9164  |
| 1355 | W | 2 | 11  | 5806  |
| 1355 | W | 2 | 25  | 3254  |
| 1355 | W | 2 | 2   | 36    |
| 1355 | W | 2 | 23  | 27    |
| 1355 | W | 2 | 21  | 16    |
| 1355 | W | 2 | 5   | 5     |
| 1355 | W | 2 | 6   | 4     |
| 1355 | W | 2 | 7   | 2     |
| 1355 | W | 2 | 16  | 1     |
| 1355 | W | 2 | 32  | 1     |
| 1367 | M | 2 | 16  | 9440  |
| 1367 | M | 2 | 7   | 5888  |
| 1367 | M | 2 | 21  | 3698  |
| 1367 | M | 2 | 19  | 29    |
| 1367 | S | 2 | 7   | 18    |
| 1367 | M | 2 | 17  | 16    |
| 1367 | S | 2 | 16  | 11    |
| 1367 | S | 2 | 21  | 6     |
| 1367 | M | 2 | 2   | 4     |
| 1367 | M | 2 | 3   | 2     |
| 1367 | M | 2 | 28  | 1     |
| 1367 | M | 2 | 12  | 1     |
| 1367 | W | 2 | 7   | 1     |
| 1429 | M | 1 | 281 | 19369 |
| 1429 | W | 1 | 281 | 1     |
| 1496 | S | 2 | 3   | 8180  |
| 1496 | S | 2 | 18  | 7973  |
| 1496 | S | 2 | 24  | 2533  |
| 1496 | S | 2 | 8   | 5     |
| 1496 | S | 2 | 12  | 1     |
| 1496 | S | 2 | 10  | 1     |
| 1496 | S | 2 | 6   | 1     |
| 1496 | M | 2 | 3   | 1     |
| 1496 | S | 2 | 30  | 1     |
| 1519 | S | 1 | 251 | 19366 |
| 1519 | M | 1 | 251 | 1     |
| 1553 | W | 2 | 5   | 15657 |



|      |   |   |     |       |
|------|---|---|-----|-------|
| 1553 | W | 2 | 9   | 14    |
| 1553 | W | 2 | 11  | 3     |
| 1553 | M | 2 | 5   | 1     |
| 1567 | M | 1 | 235 | 19340 |
| 1567 | S | 1 | 235 | 14    |
| 1600 | M | 1 | 224 | 19322 |
| 1600 | S | 1 | 224 | 50    |
| 1600 | W | 1 | 224 | 2     |
| 1610 | M | 2 | 39  | 16157 |
| 1610 | M | 2 | 15  | 1002  |
| 1610 | M | 2 | 74  | 198   |
| 1610 | M | 2 | 2   | 57    |
| 1610 | M | 2 | 30  | 10    |
| 1610 | M | 2 | 32  | 6     |
| 1610 | M | 2 | 53  | 3     |
| 1610 | M | 2 | 50  | 2     |
| 1610 | M | 2 | 9   | 2     |
| 1610 | M | 2 | 31  | 2     |
| 1610 | M | 2 | 26  | 1     |
| 1610 | S | 2 | 39  | 1     |
| 1610 | M | 2 | 37  | 1     |
| 1636 | M | 1 | 212 | 19366 |
| 1636 | W | 1 | 212 | 5     |
| 1636 | S | 1 | 212 | 1     |
| 1680 | W | 3 | 4   | 2227  |
| 1680 | W | 3 | 2   | 1231  |
| 1680 | W | 3 | 47  | 1084  |
| 1680 | W | 3 | 14  | 287   |
| 1680 | W | 3 | 65  | 211   |
| 1680 | W | 3 | 57  | 165   |
| 1680 | W | 3 | 39  | 33    |
| 1680 | W | 3 | 10  | 31    |
| 1680 | W | 3 | 32  | 10    |
| 1680 | W | 3 | 97  | 10    |
| 1680 | W | 3 | 74  | 8     |
| 1680 | W | 3 | 36  | 7     |
| 1680 | W | 3 | 16  | 5     |
| 1680 | W | 3 | 41  | 2     |
| 1737 | S | 3 | 13  | 1182  |
| 1737 | S | 3 | 28  | 435   |
| 1737 | S | 3 | 46  | 277   |
| 1737 | S | 3 | 20  | 251   |
| 1737 | S | 3 | 38  | 245   |

|      |   |   |     |       |
|------|---|---|-----|-------|
| 1737 | S | 3 | 6   | 145   |
| 1737 | S | 3 | 32  | 49    |
| 1737 | S | 3 | 55  | 20    |
| 1737 | S | 3 | 43  | 12    |
| 1737 | S | 3 | 17  | 6     |
| 1737 | S | 3 | 78  | 4     |
| 1737 | S | 3 | 22  | 4     |
| 1737 | S | 3 | 41  | 3     |
| 1737 | S | 3 | 58  | 2     |
| 1737 | M | 3 | 13  | 2     |
| 1737 | S | 3 | 53  | 1     |
| 1778 | M | 2 | 18  | 18609 |
| 1778 | M | 2 | 22  | 53    |
| 1778 | M | 2 | 8   | 19    |
| 1778 | M | 2 | 3   | 1     |
| 1778 | M | 2 | 5   | 1     |
| 1836 | S | 3 | 5   | 9852  |
| 1836 | S | 3 | 13  | 2521  |
| 1836 | S | 3 | 45  | 355   |
| 1836 | S | 3 | 22  | 58    |
| 1836 | M | 3 | 22  | 47    |
| 1836 | S | 3 | 8   | 33    |
| 1836 | S | 3 | 25  | 29    |
| 1836 | S | 3 | 6   | 9     |
| 1836 | S | 3 | 29  | 7     |
| 1836 | S | 3 | 10  | 4     |
| 1836 | S | 3 | 16  | 1     |
| 1836 | S | 3 | 20  | 1     |
| 1836 | M | 3 | 13  | 1     |
| 1836 | M | 3 | 5   | 1     |
| 1836 | S | 3 | 56  | 1     |
| 1846 | M | 1 | 142 | 19373 |
| 1846 | S | 1 | 142 | 4     |
| 1850 | W | 2 | 11  | 14581 |
| 1850 | W | 2 | 23  | 75    |
| 1850 | M | 2 | 11  | 24    |
| 1850 | W | 2 | 27  | 5     |
| 1850 | W | 2 | 20  | 2     |
| 1850 | W | 2 | 28  | 1     |
| 1850 | W | 2 | 7   | 1     |
| 1853 | M | 2 | 10  | 4455  |
| 1853 | S | 2 | 10  | 4     |
| 1853 | M | 2 | 22  | 2     |

|      |   |   |     |       |
|------|---|---|-----|-------|
| 1853 | M | 2 | 4   | 1     |
| 1872 | W | 3 | 10  | 1310  |
| 1872 | M | 3 | 13  | 138   |
| 1872 | M | 3 | 8   | 74    |
| 1872 | M | 3 | 10  | 30    |
| 1872 | W | 3 | 13  | 3     |
| 1872 | M | 3 | 4   | 1     |
| 1872 | W | 3 | 8   | 1     |
| 1925 | M | 2 | 3   | 10918 |
| 1925 | M | 2 | 2   | 6548  |
| 1925 | M | 2 | 102 | 50    |
| 1925 | M | 2 | 18  | 2     |
| 1925 | W | 2 | 3   | 2     |
| 1925 | W | 2 | 2   | 1     |
| 1936 | M | 1 | 112 | 19267 |
| 1936 | W | 1 | 112 | 2     |
| 1946 | M | 2 | 95  | 13649 |
| 1946 | M | 2 | 26  | 3724  |
| 1946 | M | 2 | 66  | 622   |
| 1946 | M | 2 | 11  | 542   |
| 1946 | M | 2 | 69  | 100   |
| 1946 | M | 2 | 86  | 37    |
| 1946 | M | 2 | 6   | 32    |
| 1946 | M | 2 | 65  | 31    |
| 1946 | M | 2 | 79  | 26    |
| 1946 | M | 2 | 34  | 18    |
| 1946 | M | 2 | 60  | 14    |
| 1946 | M | 2 | 38  | 3     |
| 1946 | M | 2 | 107 | 2     |
| 1946 | M | 2 | 94  | 2     |
| 1946 | M | 2 | 87  | 2     |
| 1946 | M | 2 | 35  | 1     |
| 1946 | M | 2 | 48  | 1     |
| 1946 | M | 2 | 4   | 1     |
| 1946 | M | 2 | 74  | 1     |
| 1946 | M | 2 | 3   | 1     |
| 1963 | S | 1 | 103 | 19259 |
| 1963 | M | 1 | 103 | 5     |
| 1970 | M | 2 | 87  | 13959 |
| 1970 | M | 2 | 18  | 3602  |
| 1970 | M | 2 | 58  | 555   |
| 1970 | M | 2 | 3   | 538   |
| 1970 | M | 2 | 61  | 89    |

|      |   |   |    |       |
|------|---|---|----|-------|
| 1970 | M | 2 | 78 | 37    |
| 1970 | M | 2 | 57 | 33    |
| 1970 | M | 2 | 71 | 26    |
| 1970 | M | 2 | 26 | 19    |
| 1970 | M | 2 | 52 | 14    |
| 1970 | M | 2 | 30 | 3     |
| 1970 | M | 2 | 99 | 2     |
| 1970 | M | 2 | 86 | 2     |
| 1970 | M | 2 | 79 | 2     |
| 1970 | M | 2 | 12 | 1     |
| 1970 | M | 2 | 27 | 1     |
| 1970 | M | 2 | 40 | 1     |
| 1970 | S | 2 | 87 | 1     |
| 1970 | M | 2 | 66 | 1     |
| 1973 | M | 2 | 86 | 13702 |
| 1973 | M | 2 | 17 | 2284  |
| 1973 | M | 2 | 57 | 631   |
| 1973 | M | 2 | 2  | 537   |
| 1973 | M | 2 | 60 | 93    |
| 1973 | M | 2 | 77 | 37    |
| 1973 | M | 2 | 56 | 33    |
| 1973 | M | 2 | 25 | 19    |
| 1973 | M | 2 | 51 | 14    |
| 1973 | M | 2 | 70 | 11    |
| 1973 | M | 2 | 29 | 3     |
| 1973 | M | 2 | 98 | 2     |
| 1973 | M | 2 | 78 | 2     |
| 1973 | M | 2 | 26 | 1     |
| 1973 | M | 2 | 39 | 1     |
| 1973 | W | 2 | 86 | 1     |
| 1973 | M | 2 | 65 | 1     |
| 1973 | S | 2 | 86 | 1     |
| 1973 | M | 2 | 85 | 1     |
| 1995 | M | 3 | 3  | 2827  |
| 1995 | M | 3 | 18 | 220   |
| 1995 | M | 3 | 20 | 47    |
| 1995 | M | 3 | 12 | 7     |
| 1995 | S | 3 | 3  | 1     |
| 1995 | M | 3 | 36 | 1     |
| 1995 | M | 3 | 10 | 1     |
| 2054 | M | 2 | 59 | 16134 |
| 2054 | M | 2 | 30 | 1884  |
| 2054 | M | 2 | 50 | 268   |

|      |   |   |    |       |
|------|---|---|----|-------|
| 2054 | M | 2 | 33 | 110   |
| 2054 | M | 2 | 29 | 41    |
| 2054 | M | 2 | 43 | 25    |
| 2054 | M | 2 | 24 | 13    |
| 2054 | M | 2 | 2  | 3     |
| 2054 | M | 2 | 5  | 2     |
| 2054 | M | 2 | 58 | 2     |
| 2054 | M | 2 | 51 | 2     |
| 2054 | S | 2 | 59 | 2     |
| 2054 | M | 2 | 71 | 2     |
| 2054 | W | 2 | 30 | 1     |
| 2054 | M | 2 | 12 | 1     |
| 2054 | M | 2 | 38 | 1     |
| 2062 | W | 1 | 70 | 19332 |
| 2062 | M | 1 | 70 | 19    |
| 2073 | M | 3 | 10 | 717   |
| 2073 | M | 3 | 5  | 480   |
| 2073 | M | 3 | 2  | 231   |
| 2073 | M | 3 | 11 | 178   |
| 2073 | M | 3 | 29 | 41    |
| 2073 | M | 3 | 21 | 2     |
| 2073 | M | 3 | 33 | 1     |
| 2140 | S | 1 | 44 | 19325 |
| 2140 | M | 1 | 44 | 40    |
| 2152 | S | 1 | 40 | 19074 |
| 2152 | M | 1 | 40 | 292   |
| 2174 | W | 2 | 19 | 15810 |
| 2174 | W | 2 | 10 | 1788  |
| 2174 | W | 2 | 3  | 26    |
| 2174 | W | 2 | 31 | 2     |
| 2174 | W | 2 | 18 | 2     |
| 2174 | W | 2 | 11 | 1     |
| 2230 | M | 1 | 14 | 18862 |
| 2230 | S | 1 | 14 | 2     |
| 2230 | W | 1 | 14 | 1     |

**Table S2. Length and count data for influenza A putative ORFs accompanying Fig. 1b (PA).**

| <b>Position</b> | <b>Kozak</b> | <b>Frame</b> | <b>Length</b> | <b>Count</b> |
|-----------------|--------------|--------------|---------------|--------------|
| 1               | W            | 1            | 716           | 20404        |
| 21              | M            | 3            | 25            | 6616         |
| 21              | M            | 3            | 47            | 5055         |
| 21              | M            | 3            | 23            | 4598         |
| 21              | M            | 3            | 48            | 2225         |
| 21              | M            | 3            | 42            | 264          |
| 21              | M            | 3            | 2             | 203          |
| 21              | M            | 3            | 26            | 196          |
| 21              | M            | 3            | 7             | 129          |
| 21              | W            | 3            | 47            | 90           |
| 21              | M            | 3            | 59            | 75           |
| 21              | M            | 3            | 21            | 66           |
| 21              | M            | 3            | 51            | 48           |
| 21              | M            | 3            | 10            | 21           |
| 21              | M            | 3            | 69            | 6            |
| 21              | M            | 3            | 61            | 2            |
| 21              | M            | 3            | 11            | 2            |
| 21              | S            | 3            | 47            | 2            |
| 21              | W            | 3            | 23            | 1            |
| 21              | M            | 3            | 14            | 1            |
| 21              | M            | 3            | 58            | 1            |
| 21              | M            | 3            | 4             | 1            |
| 21              | M            | 3            | 17            | 1            |
| 21              | M            | 3            | 18            | 1            |
| 21              | W            | 3            | 42            | 1            |
| 21              | S            | 3            | 48            | 1            |
| 34              | W            | 1            | 705           | 20248        |
| 34              | M            | 1            | 705           | 134          |
| 61              | M            | 1            | 696           | 20388        |
| 61              | W            | 1            | 696           | 10           |
| 61              | S            | 1            | 696           | 1            |
| 71              | S            | 2            | 37            | 10512        |
| 71              | S            | 2            | 4             | 5099         |
| 71              | S            | 2            | 18            | 3187         |
| 71              | S            | 2            | 39            | 747          |
| 71              | S            | 2            | 30            | 276          |
| 71              | S            | 2            | 6             | 100          |
| 71              | S            | 2            | 38            | 27           |
| 71              | S            | 2            | 48            | 26           |

|     |   |   |     |       |
|-----|---|---|-----|-------|
| 71  | S | 2 | 8   | 8     |
| 71  | S | 2 | 11  | 5     |
| 71  | S | 2 | 7   | 2     |
| 71  | S | 2 | 14  | 1     |
| 71  | M | 2 | 37  | 1     |
| 71  | S | 2 | 33  | 1     |
| 114 | M | 3 | 16  | 8060  |
| 114 | M | 3 | 17  | 6186  |
| 114 | M | 3 | 20  | 5116  |
| 114 | M | 3 | 11  | 538   |
| 114 | M | 3 | 28  | 306   |
| 114 | W | 3 | 16  | 58    |
| 114 | M | 3 | 4   | 33    |
| 114 | W | 3 | 17  | 31    |
| 114 | M | 3 | 27  | 8     |
| 114 | M | 3 | 38  | 7     |
| 114 | M | 3 | 30  | 2     |
| 114 | W | 3 | 20  | 1     |
| 114 | M | 3 | 13  | 1     |
| 132 | M | 3 | 11  | 3420  |
| 132 | M | 3 | 10  | 951   |
| 132 | M | 3 | 22  | 197   |
| 132 | M | 3 | 5   | 32    |
| 132 | M | 3 | 14  | 26    |
| 132 | M | 3 | 32  | 5     |
| 132 | M | 3 | 21  | 4     |
| 139 | W | 1 | 670 | 20401 |
| 164 | W | 2 | 6   | 12139 |
| 164 | W | 2 | 8   | 229   |
| 164 | W | 2 | 7   | 30    |
| 164 | W | 2 | 17  | 19    |
| 164 | W | 2 | 2   | 10    |
| 164 | M | 2 | 6   | 2     |
| 164 | W | 2 | 5   | 1     |
| 197 | W | 2 | 6   | 2394  |
| 197 | M | 2 | 6   | 1     |
| 197 | W | 2 | 12  | 1     |
| 206 | W | 2 | 3   | 19445 |
| 206 | W | 2 | 9   | 58    |
| 206 | M | 2 | 3   | 26    |
| 206 | W | 2 | 2   | 13    |
| 256 | S | 1 | 631 | 20081 |
| 256 | M | 1 | 631 | 9     |

|     |   |   |     |       |
|-----|---|---|-----|-------|
| 261 | S | 3 | 13  | 1386  |
| 261 | S | 3 | 5   | 394   |
| 261 | S | 3 | 8   | 123   |
| 261 | S | 3 | 23  | 30    |
| 261 | S | 3 | 53  | 17    |
| 261 | S | 3 | 16  | 15    |
| 261 | S | 3 | 28  | 9     |
| 261 | S | 3 | 25  | 5     |
| 261 | S | 3 | 31  | 3     |
| 261 | S | 3 | 4   | 2     |
| 261 | S | 3 | 14  | 1     |
| 261 | M | 3 | 5   | 1     |
| 261 | S | 3 | 27  | 1     |
| 329 | W | 2 | 12  | 17094 |
| 329 | W | 2 | 10  | 120   |
| 329 | W | 2 | 22  | 84    |
| 329 | W | 2 | 8   | 64    |
| 329 | W | 2 | 28  | 7     |
| 329 | W | 2 | 68  | 3     |
| 329 | M | 2 | 12  | 2     |
| 463 | S | 1 | 562 | 20379 |
| 463 | M | 1 | 562 | 6     |
| 491 | W | 2 | 14  | 9084  |
| 491 | W | 2 | 7   | 924   |
| 491 | W | 2 | 89  | 67    |
| 491 | W | 2 | 69  | 7     |
| 491 | M | 2 | 7   | 1     |
| 491 | M | 2 | 14  | 1     |
| 544 | S | 1 | 535 | 20312 |
| 544 | M | 1 | 535 | 8     |
| 561 | M | 3 | 14  | 12270 |
| 561 | M | 3 | 7   | 150   |
| 561 | S | 3 | 14  | 146   |
| 561 | S | 3 | 7   | 26    |
| 561 | M | 3 | 10  | 23    |
| 561 | M | 3 | 18  | 21    |
| 561 | M | 3 | 39  | 5     |
| 561 | M | 3 | 5   | 5     |
| 561 | S | 3 | 18  | 1     |
| 561 | W | 3 | 14  | 1     |
| 561 | M | 3 | 11  | 1     |
| 561 | M | 3 | 4   | 1     |
| 631 | M | 1 | 506 | 20310 |



|     |   |   |     |       |
|-----|---|---|-----|-------|
| 631 | W | 1 | 506 | 4     |
| 695 | W | 2 | 21  | 14797 |
| 695 | W | 2 | 29  | 18    |
| 695 | W | 2 | 10  | 7     |
| 695 | W | 2 | 6   | 3     |
| 695 | W | 2 | 17  | 2     |
| 695 | W | 2 | 16  | 2     |
| 695 | W | 2 | 4   | 1     |
| 695 | W | 2 | 18  | 1     |
| 695 | M | 2 | 21  | 1     |
| 701 | M | 2 | 19  | 20285 |
| 701 | M | 2 | 27  | 42    |
| 701 | M | 2 | 8   | 7     |
| 701 | M | 2 | 18  | 4     |
| 701 | M | 2 | 4   | 3     |
| 701 | M | 2 | 15  | 3     |
| 701 | M | 2 | 14  | 2     |
| 701 | M | 2 | 16  | 1     |
| 701 | S | 2 | 19  | 1     |
| 701 | M | 2 | 2   | 1     |
| 745 | W | 1 | 468 | 20383 |
| 745 | M | 1 | 468 | 6     |
| 761 | W | 2 | 7   | 9206  |
| 761 | W | 2 | 30  | 237   |
| 761 | W | 2 | 3   | 57    |
| 761 | W | 2 | 2   | 6     |
| 761 | W | 2 | 14  | 3     |
| 761 | M | 2 | 7   | 2     |
| 815 | M | 2 | 12  | 17329 |
| 815 | M | 2 | 18  | 41    |
| 815 | M | 2 | 16  | 40    |
| 815 | M | 2 | 11  | 12    |
| 815 | M | 2 | 39  | 10    |
| 815 | S | 2 | 12  | 4     |
| 815 | W | 2 | 12  | 2     |
| 815 | M | 2 | 13  | 1     |
| 815 | M | 2 | 8   | 1     |
| 853 | M | 1 | 432 | 20374 |
| 853 | S | 1 | 432 | 18    |
| 853 | W | 1 | 432 | 2     |
| 857 | W | 2 | 2   | 16268 |
| 857 | W | 2 | 4   | 2655  |
| 857 | W | 2 | 25  | 18    |

|     |   |   |     |       |
|-----|---|---|-----|-------|
| 857 | M | 2 | 2   | 5     |
| 857 | M | 2 | 4   | 1     |
| 890 | M | 2 | 14  | 9852  |
| 890 | M | 2 | 11  | 109   |
| 890 | W | 2 | 14  | 12    |
| 890 | M | 2 | 25  | 6     |
| 890 | M | 2 | 33  | 2     |
| 890 | S | 2 | 14  | 1     |
| 914 | W | 2 | 6   | 16740 |
| 914 | W | 2 | 3   | 119   |
| 914 | W | 2 | 17  | 3     |
| 914 | W | 2 | 25  | 2     |
| 917 | M | 2 | 5   | 19878 |
| 917 | M | 2 | 2   | 124   |
| 917 | M | 2 | 16  | 10    |
| 917 | W | 2 | 5   | 6     |
| 917 | M | 2 | 24  | 2     |
| 927 | W | 3 | 11  | 7460  |
| 927 | W | 3 | 17  | 6025  |
| 927 | W | 3 | 14  | 567   |
| 927 | W | 3 | 39  | 231   |
| 927 | M | 3 | 11  | 39    |
| 927 | M | 3 | 17  | 38    |
| 927 | M | 3 | 39  | 19    |
| 927 | M | 3 | 14  | 13    |
| 927 | W | 3 | 41  | 8     |
| 927 | W | 3 | 2   | 6     |
| 927 | W | 3 | 23  | 2     |
| 927 | W | 3 | 21  | 2     |
| 927 | M | 3 | 18  | 1     |
| 927 | W | 3 | 6   | 1     |
| 927 | M | 3 | 23  | 1     |
| 927 | W | 3 | 13  | 1     |
| 931 | W | 1 | 406 | 17009 |
| 931 | M | 1 | 406 | 1     |
| 948 | M | 3 | 32  | 4423  |
| 948 | M | 3 | 10  | 794   |
| 948 | M | 3 | 7   | 447   |
| 948 | M | 3 | 16  | 187   |
| 948 | M | 3 | 4   | 91    |
| 948 | M | 3 | 30  | 31    |
| 948 | M | 3 | 11  | 7     |
| 948 | M | 3 | 34  | 5     |

|      |   |   |     |       |
|------|---|---|-----|-------|
| 948  | M | 3 | 27  | 3     |
| 948  | M | 3 | 14  | 1     |
| 948  | M | 3 | 6   | 1     |
| 977  | W | 2 | 4   | 14651 |
| 977  | M | 2 | 4   | 182   |
| 977  | W | 2 | 34  | 137   |
| 977  | W | 2 | 16  | 116   |
| 977  | W | 2 | 10  | 30    |
| 977  | M | 2 | 10  | 7     |
| 977  | W | 2 | 2   | 1     |
| 1006 | M | 1 | 381 | 4599  |
| 1006 | W | 1 | 381 | 71    |
| 1011 | S | 3 | 11  | 5123  |
| 1011 | S | 3 | 13  | 34    |
| 1011 | S | 3 | 9   | 33    |
| 1011 | S | 3 | 6   | 6     |
| 1011 | M | 3 | 11  | 5     |
| 1049 | M | 2 | 10  | 16833 |
| 1049 | M | 2 | 7   | 59    |
| 1049 | S | 2 | 10  | 40    |
| 1049 | M | 2 | 5   | 11    |
| 1049 | W | 2 | 10  | 3     |
| 1049 | M | 2 | 16  | 3     |
| 1049 | M | 2 | 2   | 2     |
| 1049 | M | 2 | 3   | 1     |
| 1049 | M | 2 | 6   | 1     |
| 1078 | M | 1 | 357 | 20286 |
| 1078 | W | 1 | 357 | 5     |
| 1078 | S | 1 | 357 | 3     |
| 1101 | S | 3 | 4   | 1475  |
| 1101 | S | 3 | 14  | 31    |
| 1101 | S | 3 | 20  | 2     |
| 1101 | S | 3 | 9   | 1     |
| 1101 | S | 3 | 3   | 1     |
| 1120 | S | 1 | 343 | 20335 |
| 1145 | W | 2 | 21  | 5882  |
| 1145 | W | 2 | 5   | 1134  |
| 1145 | W | 2 | 8   | 358   |
| 1145 | W | 2 | 35  | 91    |
| 1145 | M | 2 | 21  | 3     |
| 1145 | M | 2 | 8   | 1     |
| 1157 | M | 2 | 4   | 6259  |
| 1157 | M | 2 | 17  | 5936  |

|      |   |   |     |       |
|------|---|---|-----|-------|
| 1157 | M | 2 | 31  | 84    |
| 1157 | W | 2 | 4   | 1     |
| 1157 | S | 2 | 17  | 1     |
| 1178 | M | 2 | 10  | 11732 |
| 1178 | M | 2 | 7   | 5356  |
| 1178 | M | 2 | 24  | 2261  |
| 1178 | S | 2 | 10  | 52    |
| 1178 | S | 2 | 24  | 5     |
| 1178 | M | 2 | 30  | 2     |
| 1178 | M | 2 | 11  | 1     |
| 1178 | S | 2 | 7   | 1     |
| 1187 | M | 2 | 7   | 12154 |
| 1187 | M | 2 | 21  | 2300  |
| 1187 | M | 2 | 4   | 435   |
| 1187 | S | 2 | 4   | 11    |
| 1187 | S | 2 | 7   | 6     |
| 1187 | W | 2 | 21  | 3     |
| 1187 | M | 2 | 27  | 2     |
| 1187 | S | 2 | 21  | 1     |
| 1187 | M | 2 | 8   | 1     |
| 1226 | M | 2 | 8   | 11248 |
| 1226 | M | 2 | 14  | 10    |
| 1226 | W | 2 | 8   | 1     |
| 1226 | M | 2 | 2   | 1     |
| 1226 | S | 2 | 8   | 1     |
| 1242 | M | 3 | 9   | 1643  |
| 1242 | M | 3 | 12  | 824   |
| 1242 | M | 3 | 4   | 660   |
| 1242 | M | 3 | 11  | 650   |
| 1242 | M | 3 | 21  | 7     |
| 1277 | W | 2 | 2   | 13661 |
| 1277 | W | 2 | 6   | 3449  |
| 1277 | W | 2 | 15  | 2627  |
| 1277 | W | 2 | 9   | 142   |
| 1277 | W | 2 | 33  | 20    |
| 1277 | W | 2 | 4   | 10    |
| 1277 | M | 2 | 2   | 2     |
| 1292 | M | 2 | 10  | 12753 |
| 1292 | M | 2 | 4   | 150   |
| 1292 | M | 2 | 28  | 78    |
| 1292 | M | 2 | 7   | 46    |
| 1292 | W | 2 | 10  | 14    |
| 1321 | M | 1 | 276 | 20197 |

|      |   |   |     |       |
|------|---|---|-----|-------|
| 1321 | W | 1 | 276 | 3     |
| 1378 | M | 1 | 257 | 20296 |
| 1378 | W | 1 | 257 | 15    |
| 1412 | W | 2 | 11  | 18605 |
| 1412 | W | 2 | 14  | 53    |
| 1412 | W | 2 | 6   | 17    |
| 1412 | W | 2 | 4   | 4     |
| 1412 | M | 2 | 11  | 3     |
| 1412 | W | 2 | 5   | 1     |
| 1412 | W | 2 | 9   | 1     |
| 1429 | S | 1 | 240 | 20365 |
| 1429 | M | 1 | 240 | 34    |
| 1433 | W | 2 | 4   | 16352 |
| 1433 | W | 2 | 7   | 57    |
| 1433 | M | 2 | 4   | 5     |
| 1433 | W | 2 | 2   | 1     |
| 1453 | W | 1 | 232 | 20373 |
| 1453 | M | 1 | 232 | 8     |
| 1464 | W | 3 | 25  | 2476  |
| 1464 | W | 3 | 10  | 1332  |
| 1464 | W | 3 | 27  | 1094  |
| 1464 | W | 3 | 40  | 185   |
| 1464 | W | 3 | 17  | 161   |
| 1464 | W | 3 | 3   | 96    |
| 1464 | W | 3 | 6   | 32    |
| 1464 | W | 3 | 55  | 24    |
| 1464 | W | 3 | 8   | 9     |
| 1464 | W | 3 | 19  | 2     |
| 1464 | S | 3 | 25  | 1     |
| 1464 | W | 3 | 30  | 1     |
| 1502 | M | 2 | 4   | 17276 |
| 1502 | M | 2 | 3   | 889   |
| 1502 | M | 2 | 10  | 80    |
| 1502 | M | 2 | 2   | 1     |
| 1538 | M | 2 | 5   | 17537 |
| 1538 | M | 2 | 4   | 928   |
| 1538 | M | 2 | 8   | 122   |
| 1538 | S | 2 | 5   | 1     |
| 1538 | M | 2 | 19  | 1     |
| 1547 | W | 2 | 2   | 13483 |
| 1547 | W | 2 | 5   | 43    |
| 1547 | W | 2 | 16  | 1     |
| 1567 | S | 1 | 194 | 20398 |

|      |   |   |     |       |
|------|---|---|-----|-------|
| 1608 | M | 3 | 7   | 15900 |
| 1608 | M | 3 | 56  | 848   |
| 1608 | M | 3 | 29  | 194   |
| 1608 | M | 3 | 35  | 150   |
| 1608 | M | 3 | 37  | 142   |
| 1608 | M | 3 | 31  | 16    |
| 1608 | M | 3 | 60  | 13    |
| 1608 | S | 3 | 7   | 11    |
| 1608 | M | 3 | 2   | 4     |
| 1608 | M | 3 | 62  | 4     |
| 1608 | M | 3 | 4   | 4     |
| 1608 | S | 3 | 56  | 2     |
| 1608 | M | 3 | 16  | 1     |
| 1642 | M | 1 | 169 | 20080 |
| 1642 | S | 1 | 169 | 253   |
| 1642 | W | 1 | 169 | 1     |
| 1681 | W | 1 | 156 | 20224 |
| 1681 | M | 1 | 156 | 33    |
| 1691 | W | 2 | 11  | 1485  |
| 1691 | W | 2 | 9   | 15    |
| 1703 | M | 2 | 7   | 14961 |
| 1703 | M | 2 | 5   | 278   |
| 1703 | M | 2 | 13  | 1     |
| 1703 | W | 2 | 7   | 1     |
| 1723 | M | 1 | 142 | 20393 |
| 1723 | W | 1 | 142 | 1     |
| 1728 | S | 3 | 16  | 13953 |
| 1728 | S | 3 | 20  | 5557  |
| 1728 | S | 3 | 36  | 25    |
| 1728 | S | 3 | 22  | 11    |
| 1728 | S | 3 | 26  | 10    |
| 1728 | S | 3 | 32  | 9     |
| 1728 | S | 3 | 3   | 4     |
| 1728 | M | 3 | 16  | 2     |
| 1728 | S | 3 | 5   | 1     |
| 1735 | S | 1 | 138 | 20367 |
| 1735 | M | 1 | 138 | 4     |
| 1741 | M | 1 | 136 | 20096 |
| 1749 | M | 3 | 9   | 2489  |
| 1749 | M | 3 | 13  | 61    |
| 1749 | M | 3 | 15  | 3     |
| 1749 | M | 3 | 29  | 2     |
| 1749 | W | 3 | 9   | 1     |

|      |   |   |     |       |
|------|---|---|-----|-------|
| 1783 | M | 1 | 122 | 20247 |
| 1783 | S | 1 | 122 | 76    |
| 1819 | M | 1 | 110 | 20101 |
| 1819 | S | 1 | 110 | 1     |
| 1854 | S | 3 | 37  | 7531  |
| 1854 | S | 3 | 19  | 4082  |
| 1854 | S | 3 | 42  | 2864  |
| 1854 | S | 3 | 24  | 1264  |
| 1854 | S | 3 | 7   | 755   |
| 1854 | S | 3 | 29  | 592   |
| 1854 | S | 3 | 28  | 325   |
| 1854 | S | 3 | 4   | 194   |
| 1854 | S | 3 | 54  | 145   |
| 1854 | S | 3 | 10  | 54    |
| 1854 | S | 3 | 16  | 25    |
| 1854 | S | 3 | 44  | 4     |
| 1854 | S | 3 | 69  | 2     |
| 1854 | M | 3 | 42  | 1     |
| 1854 | M | 3 | 29  | 1     |
| 1854 | S | 3 | 56  | 1     |
| 1854 | M | 3 | 19  | 1     |
| 1908 | M | 3 | 19  | 2206  |
| 1908 | M | 3 | 6   | 1084  |
| 1908 | M | 3 | 11  | 384   |
| 1908 | M | 3 | 36  | 316   |
| 1908 | M | 3 | 24  | 239   |
| 1908 | M | 3 | 10  | 80    |
| 1908 | M | 3 | 26  | 5     |
| 1949 | W | 2 | 44  | 13854 |
| 1949 | W | 2 | 5   | 3126  |
| 1949 | W | 2 | 17  | 278   |
| 1949 | W | 2 | 26  | 48    |
| 1949 | W | 2 | 65  | 31    |
| 1949 | W | 2 | 18  | 13    |
| 1949 | W | 2 | 22  | 12    |
| 1949 | W | 2 | 38  | 10    |
| 1949 | W | 2 | 40  | 7     |
| 1949 | W | 2 | 33  | 3     |
| 1949 | W | 2 | 61  | 2     |
| 1949 | W | 2 | 15  | 2     |
| 1949 | W | 2 | 9   | 1     |
| 1949 | W | 2 | 12  | 1     |
| 2060 | W | 2 | 7   | 18615 |

|      |   |   |    |       |
|------|---|---|----|-------|
| 2060 | M | 2 | 7  | 151   |
| 2060 | W | 2 | 28 | 63    |
| 2060 | W | 2 | 3  | 13    |
| 2060 | W | 2 | 24 | 5     |
| 2060 | M | 2 | 3  | 1     |
| 2087 | W | 2 | 19 | 12656 |
| 2087 | W | 2 | 15 | 5069  |
| 2087 | W | 2 | 6  | 39    |
| 2087 | W | 2 | 11 | 27    |
| 2087 | W | 2 | 5  | 2     |
| 2108 | W | 2 | 12 | 14400 |
| 2108 | W | 2 | 8  | 5112  |
| 2108 | W | 2 | 4  | 27    |
| 2138 | W | 2 | 2  | 19673 |
| 2138 | M | 2 | 2  | 85    |



**Table S3. Length and count data for influenza A putative ORFs accompanying Figure S1 (PB2).**

| <b>Position</b> | <b>Kozak</b> | <b>Frame</b> | <b>Length</b> | <b>Count</b> |
|-----------------|--------------|--------------|---------------|--------------|
| 1               | W            | 1            | 759           | 19320        |
| 31              | W            | 1            | 749           | 19305        |
| 31              | M            | 1            | 749           | 8            |
| 82              | M            | 1            | 732           | 19283        |
| 82              | W            | 1            | 732           | 15           |
| 82              | S            | 1            | 732           | 2            |
| 139             | M            | 1            | 713           | 19289        |
| 139             | W            | 1            | 713           | 16           |
| 144             | S            | 3            | 11            | 5239         |
| 144             | S            | 3            | 20            | 3277         |
| 144             | S            | 3            | 12            | 1422         |
| 144             | S            | 3            | 23            | 467          |
| 144             | S            | 3            | 16            | 218          |
| 144             | S            | 3            | 34            | 6            |
| 144             | S            | 3            | 31            | 2            |
| 144             | M            | 3            | 12            | 1            |
| 148             | W            | 1            | 710           | 19270        |
| 148             | M            | 1            | 710           | 2            |
| 151             | S            | 1            | 709           | 19312        |
| 151             | M            | 1            | 709           | 5            |
| 157             | M            | 1            | 707           | 19305        |
| 157             | W            | 1            | 707           | 2            |
| 190             | S            | 1            | 696           | 12629        |
| 190             | M            | 1            | 696           | 79           |
| 196             | M            | 1            | 694           | 14818        |
| 196             | S            | 1            | 694           | 3875         |
| 196             | W            | 1            | 694           | 1            |
| 212             | M            | 2            | 18            | 13722        |
| 212             | M            | 2            | 10            | 4704         |
| 212             | M            | 2            | 25            | 55           |
| 212             | M            | 2            | 23            | 32           |
| 212             | S            | 2            | 10            | 2            |
| 212             | M            | 2            | 9             | 2            |
| 212             | M            | 2            | 19            | 1            |
| 212             | M            | 2            | 6             | 1            |
| 212             | M            | 2            | 15            | 1            |
| 212             | W            | 2            | 18            | 1            |
| 231             | M            | 3            | 2             | 3825         |
| 231             | S            | 3            | 2             | 1253         |

|     |   |   |     |       |
|-----|---|---|-----|-------|
| 231 | M | 3 | 23  | 153   |
| 231 | M | 3 | 5   | 153   |
| 231 | M | 3 | 38  | 119   |
| 231 | S | 3 | 5   | 13    |
| 231 | M | 3 | 35  | 11    |
| 231 | S | 3 | 38  | 4     |
| 231 | M | 3 | 10  | 3     |
| 231 | S | 3 | 23  | 3     |
| 231 | S | 3 | 42  | 2     |
| 231 | S | 3 | 45  | 1     |
| 231 | M | 3 | 25  | 1     |
| 241 | M | 1 | 679 | 4179  |
| 241 | S | 1 | 679 | 1     |
| 241 | W | 1 | 679 | 1     |
| 245 | W | 2 | 7   | 7299  |
| 245 | W | 2 | 14  | 31    |
| 245 | W | 2 | 12  | 14    |
| 245 | W | 2 | 8   | 2     |
| 245 | W | 2 | 4   | 1     |
| 245 | M | 2 | 7   | 1     |
| 248 | M | 2 | 6   | 18618 |
| 248 | W | 2 | 6   | 163   |
| 248 | M | 2 | 13  | 63    |
| 248 | M | 2 | 11  | 35    |
| 248 | M | 2 | 7   | 3     |
| 248 | M | 2 | 3   | 1     |
| 268 | S | 1 | 670 | 18312 |
| 268 | M | 1 | 670 | 897   |
| 291 | S | 3 | 3   | 14099 |
| 291 | S | 3 | 22  | 1276  |
| 291 | S | 3 | 18  | 118   |
| 291 | M | 3 | 18  | 101   |
| 291 | M | 3 | 3   | 29    |
| 291 | S | 3 | 9   | 28    |
| 291 | S | 3 | 15  | 25    |
| 291 | S | 3 | 25  | 4     |
| 291 | S | 3 | 38  | 2     |
| 291 | M | 3 | 15  | 1     |
| 291 | M | 3 | 5   | 1     |
| 291 | M | 3 | 22  | 1     |
| 305 | S | 2 | 23  | 14760 |
| 305 | S | 2 | 3   | 3851  |
| 305 | S | 2 | 20  | 59    |

|     |   |   |    |       |
|-----|---|---|----|-------|
| 305 | S | 2 | 6  | 17    |
| 305 | S | 2 | 21 | 11    |
| 305 | S | 2 | 2  | 8     |
| 305 | S | 2 | 5  | 4     |
| 305 | S | 2 | 4  | 2     |
| 305 | M | 2 | 23 | 2     |
| 305 | S | 2 | 10 | 2     |
| 305 | S | 2 | 18 | 1     |
| 305 | S | 2 | 39 | 1     |
| 305 | S | 2 | 17 | 1     |
| 305 | S | 2 | 75 | 1     |
| 380 | S | 2 | 14 | 6602  |
| 380 | S | 2 | 20 | 3793  |
| 380 | S | 2 | 18 | 3578  |
| 380 | S | 2 | 50 | 591   |
| 380 | S | 2 | 36 | 98    |
| 380 | S | 2 | 12 | 39    |
| 380 | S | 2 | 39 | 20    |
| 380 | S | 2 | 35 | 8     |
| 380 | S | 2 | 45 | 4     |
| 380 | S | 2 | 49 | 2     |
| 380 | S | 2 | 17 | 2     |
| 380 | S | 2 | 27 | 1     |
| 380 | M | 2 | 20 | 1     |
| 380 | S | 2 | 8  | 1     |
| 380 | S | 2 | 25 | 1     |
| 380 | S | 2 | 56 | 1     |
| 380 | M | 2 | 14 | 1     |
| 452 | M | 2 | 11 | 12093 |
| 452 | M | 2 | 26 | 2979  |
| 452 | M | 2 | 12 | 387   |
| 452 | M | 2 | 21 | 111   |
| 452 | M | 2 | 15 | 95    |
| 452 | M | 2 | 3  | 85    |
| 452 | M | 2 | 32 | 16    |
| 452 | M | 2 | 25 | 4     |
| 452 | W | 2 | 26 | 4     |
| 452 | M | 2 | 9  | 2     |
| 482 | M | 2 | 16 | 3163  |
| 482 | M | 2 | 2  | 389   |
| 482 | M | 2 | 11 | 182   |
| 482 | M | 2 | 5  | 95    |
| 482 | M | 2 | 22 | 18    |

|     |   |   |     |       |
|-----|---|---|-----|-------|
| 482 | M | 2 | 15  | 2     |
| 482 | W | 2 | 16  | 1     |
| 482 | S | 2 | 5   | 1     |
| 490 | S | 1 | 596 | 19309 |
| 490 | M | 1 | 596 | 4     |
| 509 | W | 2 | 7   | 16552 |
| 509 | W | 2 | 2   | 1181  |
| 509 | W | 2 | 13  | 138   |
| 509 | W | 2 | 6   | 24    |
| 509 | W | 2 | 15  | 10    |
| 509 | M | 2 | 7   | 2     |
| 509 | W | 2 | 5   | 2     |
| 509 | M | 2 | 2   | 1     |
| 604 | M | 1 | 558 | 19193 |
| 604 | W | 1 | 558 | 79    |
| 604 | S | 1 | 558 | 2     |
| 616 | W | 1 | 554 | 19303 |
| 616 | M | 1 | 554 | 3     |
| 714 | M | 3 | 14  | 6046  |
| 714 | M | 3 | 15  | 659   |
| 714 | M | 3 | 12  | 88    |
| 714 | W | 3 | 15  | 85    |
| 714 | M | 3 | 10  | 26    |
| 714 | W | 3 | 14  | 14    |
| 714 | M | 3 | 17  | 5     |
| 714 | M | 3 | 81  | 2     |
| 727 | W | 1 | 517 | 18991 |
| 727 | M | 1 | 517 | 1     |
| 755 | M | 2 | 7   | 17284 |
| 755 | M | 2 | 3   | 555   |
| 755 | M | 2 | 14  | 25    |
| 755 | M | 2 | 40  | 22    |
| 755 | W | 2 | 7   | 17    |
| 755 | M | 2 | 29  | 16    |
| 755 | M | 2 | 25  | 3     |
| 755 | M | 2 | 15  | 2     |
| 755 | M | 2 | 43  | 1     |
| 755 | W | 2 | 14  | 1     |
| 755 | M | 2 | 56  | 1     |
| 755 | M | 2 | 41  | 1     |
| 755 | S | 2 | 15  | 1     |
| 758 | M | 2 | 6   | 12848 |
| 758 | M | 2 | 2   | 1128  |

|      |   |   |     |       |
|------|---|---|-----|-------|
| 758  | M | 2 | 13  | 18    |
| 758  | M | 2 | 28  | 16    |
| 758  | M | 2 | 24  | 3     |
| 758  | M | 2 | 14  | 2     |
| 758  | M | 2 | 39  | 1     |
| 761  | M | 2 | 5   | 16449 |
| 761  | M | 2 | 12  | 23    |
| 761  | M | 2 | 38  | 22    |
| 761  | M | 2 | 27  | 16    |
| 761  | M | 2 | 13  | 3     |
| 761  | M | 2 | 23  | 3     |
| 761  | S | 2 | 5   | 1     |
| 761  | M | 2 | 41  | 1     |
| 761  | M | 2 | 54  | 1     |
| 761  | M | 2 | 39  | 1     |
| 847  | M | 1 | 477 | 19297 |
| 847  | W | 1 | 477 | 8     |
| 880  | S | 1 | 466 | 18516 |
| 880  | M | 1 | 466 | 798   |
| 880  | W | 1 | 466 | 1     |
| 930  | W | 3 | 9   | 9581  |
| 930  | W | 3 | 20  | 4586  |
| 930  | W | 3 | 47  | 2199  |
| 930  | W | 3 | 13  | 2006  |
| 930  | W | 3 | 50  | 139   |
| 930  | W | 3 | 28  | 108   |
| 930  | M | 3 | 9   | 44    |
| 930  | W | 3 | 7   | 36    |
| 930  | M | 3 | 13  | 25    |
| 930  | W | 3 | 37  | 19    |
| 930  | W | 3 | 44  | 5     |
| 930  | W | 3 | 23  | 4     |
| 930  | M | 3 | 20  | 3     |
| 930  | W | 3 | 27  | 2     |
| 930  | W | 3 | 16  | 1     |
| 930  | W | 3 | 30  | 1     |
| 930  | W | 3 | 31  | 1     |
| 943  | S | 1 | 445 | 14609 |
| 943  | M | 1 | 445 | 8     |
| 1070 | W | 2 | 24  | 11192 |
| 1070 | W | 2 | 17  | 4641  |
| 1070 | W | 2 | 28  | 2195  |
| 1070 | W | 2 | 27  | 340   |

|      |   |   |     |       |
|------|---|---|-----|-------|
| 1070 | W | 2 | 9   | 179   |
| 1070 | W | 2 | 8   | 159   |
| 1070 | W | 2 | 6   | 24    |
| 1070 | W | 2 | 16  | 13    |
| 1070 | W | 2 | 20  | 5     |
| 1070 | W | 2 | 7   | 4     |
| 1070 | W | 2 | 11  | 4     |
| 1070 | M | 2 | 28  | 3     |
| 1070 | W | 2 | 22  | 3     |
| 1070 | M | 2 | 24  | 3     |
| 1070 | W | 2 | 13  | 1     |
| 1070 | W | 2 | 18  | 1     |
| 1070 | W | 2 | 14  | 1     |
| 1079 | M | 2 | 21  | 11048 |
| 1079 | M | 2 | 14  | 4760  |
| 1079 | M | 2 | 25  | 1656  |
| 1079 | M | 2 | 6   | 165   |
| 1079 | M | 2 | 5   | 160   |
| 1079 | M | 2 | 24  | 148   |
| 1079 | M | 2 | 3   | 23    |
| 1079 | M | 2 | 4   | 6     |
| 1079 | M | 2 | 17  | 4     |
| 1079 | M | 2 | 8   | 4     |
| 1079 | M | 2 | 19  | 3     |
| 1079 | M | 2 | 13  | 2     |
| 1079 | M | 2 | 11  | 1     |
| 1079 | W | 2 | 21  | 1     |
| 1079 | M | 2 | 10  | 1     |
| 1093 | S | 1 | 395 | 19034 |
| 1093 | M | 1 | 395 | 37    |
| 1169 | M | 2 | 8   | 1409  |
| 1169 | M | 2 | 10  | 646   |
| 1169 | M | 2 | 4   | 346   |
| 1169 | M | 2 | 9   | 116   |
| 1169 | M | 2 | 20  | 65    |
| 1169 | M | 2 | 7   | 19    |
| 1169 | S | 2 | 10  | 2     |
| 1204 | S | 1 | 358 | 19252 |
| 1204 | M | 1 | 358 | 18    |
| 1228 | W | 1 | 350 | 18448 |
| 1228 | M | 1 | 350 | 830   |
| 1228 | S | 1 | 350 | 2     |
| 1291 | W | 1 | 329 | 19195 |

|      |   |   |     |       |
|------|---|---|-----|-------|
| 1291 | M | 1 | 329 | 122   |
| 1322 | M | 2 | 16  | 14223 |
| 1322 | M | 2 | 19  | 1868  |
| 1322 | M | 2 | 6   | 1090  |
| 1322 | M | 2 | 13  | 342   |
| 1322 | M | 2 | 4   | 169   |
| 1322 | M | 2 | 26  | 51    |
| 1322 | M | 2 | 10  | 12    |
| 1322 | M | 2 | 18  | 1     |
| 1322 | M | 2 | 20  | 1     |
| 1367 | M | 2 | 4   | 3046  |
| 1367 | M | 2 | 11  | 57    |
| 1367 | M | 2 | 5   | 12    |
| 1367 | S | 2 | 3   | 1     |
| 1372 | S | 1 | 302 | 19316 |
| 1372 | M | 1 | 302 | 2     |
| 1378 | M | 1 | 300 | 16277 |
| 1378 | S | 1 | 300 | 3029  |
| 1399 | M | 1 | 293 | 18938 |
| 1399 | S | 1 | 293 | 58    |
| 1399 | W | 1 | 293 | 1     |
| 1417 | M | 1 | 287 | 18095 |
| 1417 | W | 1 | 287 | 2     |
| 1423 | W | 1 | 285 | 5432  |
| 1447 | S | 1 | 277 | 18861 |
| 1447 | M | 1 | 277 | 4     |
| 1457 | W | 2 | 9   | 6806  |
| 1457 | W | 2 | 8   | 4898  |
| 1457 | W | 2 | 16  | 3576  |
| 1457 | W | 2 | 10  | 3290  |
| 1457 | M | 2 | 10  | 5     |
| 1457 | M | 2 | 8   | 4     |
| 1457 | W | 2 | 5   | 3     |
| 1457 | M | 2 | 9   | 1     |
| 1457 | W | 2 | 41  | 1     |
| 1469 | W | 2 | 4   | 1153  |
| 1469 | W | 2 | 6   | 24    |
| 1529 | M | 2 | 17  | 8178  |
| 1529 | M | 2 | 8   | 451   |
| 1529 | M | 2 | 19  | 60    |
| 1529 | M | 2 | 14  | 38    |
| 1529 | M | 2 | 12  | 4     |
| 1529 | M | 2 | 3   | 1     |

|      |   |   |     |       |
|------|---|---|-----|-------|
| 1603 | W | 1 | 225 | 18920 |
| 1603 | M | 1 | 225 | 5     |
| 1606 | M | 1 | 224 | 18920 |
| 1606 | W | 1 | 224 | 393   |
| 1619 | M | 2 | 6   | 6612  |
| 1619 | M | 2 | 20  | 3699  |
| 1619 | M | 2 | 14  | 714   |
| 1619 | M | 2 | 13  | 710   |
| 1619 | M | 2 | 43  | 585   |
| 1619 | M | 2 | 7   | 284   |
| 1619 | M | 2 | 56  | 68    |
| 1619 | M | 2 | 35  | 7     |
| 1619 | M | 2 | 48  | 2     |
| 1619 | M | 2 | 19  | 2     |
| 1619 | S | 2 | 13  | 1     |
| 1619 | M | 2 | 15  | 1     |
| 1619 | W | 2 | 43  | 1     |
| 1653 | M | 3 | 26  | 8379  |
| 1653 | M | 3 | 22  | 1725  |
| 1653 | M | 3 | 3   | 1561  |
| 1653 | M | 3 | 9   | 374   |
| 1653 | M | 3 | 21  | 268   |
| 1653 | M | 3 | 34  | 99    |
| 1653 | M | 3 | 24  | 3     |
| 1653 | M | 3 | 15  | 1     |
| 1653 | W | 3 | 26  | 1     |
| 1689 | M | 3 | 14  | 8962  |
| 1689 | M | 3 | 10  | 3864  |
| 1689 | M | 3 | 9   | 3544  |
| 1689 | M | 3 | 22  | 223   |
| 1689 | S | 3 | 10  | 88    |
| 1689 | M | 3 | 3   | 8     |
| 1689 | M | 3 | 2   | 4     |
| 1689 | S | 3 | 14  | 4     |
| 1689 | M | 3 | 12  | 3     |
| 1689 | S | 3 | 22  | 3     |
| 1689 | W | 3 | 9   | 1     |
| 1708 | M | 1 | 190 | 18672 |
| 1708 | W | 1 | 190 | 117   |
| 1723 | S | 1 | 185 | 18786 |
| 1723 | M | 1 | 185 | 1     |
| 1807 | W | 1 | 157 | 19315 |
| 1814 | M | 2 | 10  | 15074 |



|      |   |   |     |       |
|------|---|---|-----|-------|
| 1814 | M | 2 | 2   | 175   |
| 1814 | M | 2 | 11  | 58    |
| 1814 | M | 2 | 3   | 2     |
| 1891 | M | 1 | 129 | 19256 |
| 1891 | W | 1 | 129 | 41    |
| 1933 | M | 1 | 115 | 14156 |
| 2012 | M | 2 | 4   | 16543 |
| 2012 | M | 2 | 20  | 437   |
| 2012 | M | 2 | 15  | 335   |
| 2012 | M | 2 | 5   | 11    |
| 2012 | S | 2 | 4   | 3     |
| 2012 | M | 2 | 24  | 2     |
| 2012 | W | 2 | 4   | 2     |
| 2012 | M | 2 | 12  | 2     |
| 2012 | M | 2 | 13  | 1     |
| 2012 | M | 2 | 8   | 1     |
| 2039 | W | 2 | 11  | 15206 |
| 2039 | W | 2 | 6   | 3088  |
| 2039 | W | 2 | 3   | 25    |
| 2039 | W | 2 | 28  | 17    |
| 2039 | W | 2 | 15  | 6     |
| 2039 | M | 2 | 11  | 5     |
| 2039 | M | 2 | 6   | 4     |
| 2039 | W | 2 | 4   | 2     |
| 2039 | W | 2 | 17  | 2     |
| 2039 | W | 2 | 10  | 1     |
| 2111 | S | 2 | 4   | 15284 |
| 2111 | S | 2 | 9   | 27    |
| 2111 | M | 2 | 2   | 3     |
| 2111 | M | 2 | 4   | 3     |
| 2132 | W | 2 | 2   | 17677 |
| 2132 | W | 2 | 14  | 119   |
| 2132 | M | 2 | 2   | 1     |
| 2132 | W | 2 | 15  | 1     |
| 2168 | W | 2 | 2   | 18621 |
| 2168 | W | 2 | 3   | 130   |
| 2168 | M | 2 | 2   | 6     |
| 2168 | W | 2 | 8   | 1     |
| 2203 | M | 1 | 25  | 19315 |
| 2266 | M | 1 | 4   | 19216 |
| 2266 | W | 1 | 4   | 3     |
| 2266 | S | 1 | 4   | 2     |

**Table S4. Length and count data for influenza A putative ORFs accompanying Figure S2 (NP).**

| <b>Position</b> | <b>Kozak</b> | <b>Frame</b> | <b>Length</b> | <b>Count</b> |
|-----------------|--------------|--------------|---------------|--------------|
| 1               | W            | 1            | 498           | 20219        |
| 29              | W            | 2            | 22            | 10273        |
| 29              | W            | 2            | 46            | 7764         |
| 29              | W            | 2            | 51            | 225          |
| 29              | W            | 2            | 39            | 155          |
| 29              | W            | 2            | 37            | 83           |
| 29              | W            | 2            | 53            | 82           |
| 29              | W            | 2            | 26            | 81           |
| 29              | W            | 2            | 19            | 53           |
| 29              | W            | 2            | 23            | 44           |
| 29              | W            | 2            | 15            | 34           |
| 29              | W            | 2            | 95            | 4            |
| 29              | M            | 2            | 46            | 3            |
| 29              | W            | 2            | 2             | 2            |
| 29              | W            | 2            | 12            | 1            |
| 29              | W            | 2            | 33            | 1            |
| 29              | W            | 2            | 13            | 1            |
| 37              | M            | 1            | 486           | 20199        |
| 37              | S            | 1            | 486           | 15           |
| 47              | M            | 2            | 16            | 5276         |
| 47              | M            | 2            | 33            | 106          |
| 47              | M            | 2            | 13            | 34           |
| 47              | M            | 2            | 40            | 30           |
| 47              | M            | 2            | 45            | 1            |
| 47              | M            | 2            | 27            | 1            |
| 62              | M            | 2            | 11            | 11394        |
| 62              | M            | 2            | 35            | 7771         |
| 62              | M            | 2            | 40            | 222          |
| 62              | M            | 2            | 28            | 155          |
| 62              | M            | 2            | 42            | 86           |
| 62              | M            | 2            | 15            | 80           |
| 62              | M            | 2            | 26            | 77           |
| 62              | M            | 2            | 8             | 68           |
| 62              | M            | 2            | 12            | 43           |
| 62              | M            | 2            | 4             | 33           |
| 62              | W            | 2            | 11            | 16           |
| 62              | W            | 2            | 35            | 9            |
| 62              | M            | 2            | 84            | 4            |
| 62              | M            | 2            | 22            | 1            |

|     |   |   |     |       |
|-----|---|---|-----|-------|
| 62  | W | 2 | 40  | 1     |
| 62  | M | 2 | 2   | 1     |
| 94  | M | 1 | 467 | 11598 |
| 94  | S | 1 | 467 | 8617  |
| 94  | W | 1 | 467 | 2     |
| 101 | M | 2 | 22  | 4010  |
| 101 | M | 2 | 27  | 44    |
| 101 | M | 2 | 15  | 11    |
| 101 | M | 2 | 13  | 2     |
| 127 | W | 1 | 456 | 20200 |
| 149 | W | 2 | 6   | 1345  |
| 149 | W | 2 | 11  | 69    |
| 149 | W | 2 | 13  | 39    |
| 155 | M | 2 | 4   | 17333 |
| 155 | M | 2 | 9   | 492   |
| 155 | M | 2 | 11  | 90    |
| 155 | M | 2 | 53  | 4     |
| 155 | S | 2 | 4   | 1     |
| 158 | S | 2 | 3   | 4561  |
| 158 | M | 2 | 3   | 1     |
| 158 | S | 2 | 8   | 1     |
| 196 | S | 1 | 433 | 20128 |
| 196 | M | 1 | 433 | 88    |
| 215 | W | 2 | 33  | 8248  |
| 215 | W | 2 | 7   | 6542  |
| 215 | W | 2 | 28  | 3879  |
| 215 | W | 2 | 36  | 245   |
| 215 | W | 2 | 64  | 9     |
| 215 | W | 2 | 30  | 3     |
| 215 | W | 2 | 32  | 3     |
| 215 | M | 2 | 7   | 2     |
| 215 | W | 2 | 27  | 1     |
| 215 | M | 2 | 28  | 1     |
| 215 | W | 2 | 44  | 1     |
| 302 | S | 2 | 4   | 5423  |
| 302 | M | 2 | 4   | 5254  |
| 302 | S | 2 | 7   | 199   |
| 302 | M | 2 | 15  | 30    |
| 302 | S | 2 | 35  | 15    |
| 302 | S | 2 | 3   | 3     |
| 302 | S | 2 | 15  | 1     |
| 309 | S | 3 | 8   | 9986  |
| 309 | S | 3 | 41  | 959   |

|     |   |   |     |       |
|-----|---|---|-----|-------|
| 309 | M | 3 | 8   | 865   |
| 309 | S | 3 | 21  | 193   |
| 309 | S | 3 | 20  | 139   |
| 309 | S | 3 | 2   | 73    |
| 309 | S | 3 | 38  | 26    |
| 309 | S | 3 | 11  | 17    |
| 309 | S | 3 | 13  | 17    |
| 309 | S | 3 | 9   | 8     |
| 309 | S | 3 | 98  | 6     |
| 309 | S | 3 | 116 | 5     |
| 309 | M | 3 | 20  | 4     |
| 309 | S | 3 | 23  | 3     |
| 309 | S | 3 | 24  | 1     |
| 309 | S | 3 | 376 | 1     |
| 309 | S | 3 | 244 | 1     |
| 313 | W | 1 | 394 | 15159 |
| 332 | W | 2 | 5   | 11406 |
| 332 | W | 2 | 25  | 6128  |
| 332 | W | 2 | 22  | 888   |
| 332 | W | 2 | 6   | 160   |
| 332 | W | 2 | 26  | 13    |
| 332 | W | 2 | 11  | 2     |
| 332 | M | 2 | 25  | 1     |
| 332 | W | 2 | 32  | 1     |
| 332 | W | 2 | 18  | 1     |
| 374 | S | 2 | 11  | 7408  |
| 374 | S | 2 | 12  | 5894  |
| 374 | S | 2 | 8   | 5891  |
| 374 | M | 2 | 11  | 4     |
| 374 | S | 2 | 18  | 2     |
| 374 | S | 2 | 4   | 1     |
| 374 | S | 2 | 5   | 1     |
| 380 | M | 2 | 6   | 2008  |
| 380 | M | 2 | 9   | 17    |
| 380 | M | 2 | 10  | 17    |
| 383 | M | 2 | 9   | 5774  |
| 383 | M | 2 | 5   | 5400  |
| 383 | M | 2 | 8   | 1770  |
| 383 | W | 2 | 5   | 1     |
| 383 | M | 2 | 15  | 1     |
| 383 | M | 2 | 2   | 1     |
| 406 | W | 1 | 363 | 2956  |
| 409 | M | 1 | 362 | 12199 |

|     |   |   |     |       |
|-----|---|---|-----|-------|
| 409 | W | 1 | 362 | 8014  |
| 409 | S | 1 | 362 | 3     |
| 414 | S | 3 | 6   | 1689  |
| 414 | S | 3 | 3   | 23    |
| 414 | S | 3 | 81  | 6     |
| 414 | S | 3 | 5   | 3     |
| 414 | S | 3 | 63  | 1     |
| 414 | S | 3 | 341 | 1     |
| 414 | S | 3 | 209 | 1     |
| 431 | W | 2 | 22  | 19275 |
| 431 | W | 2 | 10  | 468   |
| 431 | W | 2 | 39  | 179   |
| 431 | W | 2 | 2   | 7     |
| 431 | W | 2 | 6   | 4     |
| 431 | W | 2 | 11  | 3     |
| 431 | M | 2 | 22  | 3     |
| 431 | W | 2 | 19  | 1     |
| 431 | W | 2 | 46  | 1     |
| 434 | M | 2 | 21  | 16037 |
| 434 | M | 2 | 9   | 426   |
| 434 | M | 2 | 38  | 148   |
| 434 | M | 2 | 5   | 4     |
| 434 | M | 2 | 10  | 3     |
| 434 | M | 2 | 18  | 1     |
| 475 | S | 1 | 340 | 20164 |
| 475 | M | 1 | 340 | 1     |
| 487 | M | 1 | 336 | 19920 |
| 487 | W | 1 | 336 | 287   |
| 487 | S | 1 | 336 | 1     |
| 499 | W | 1 | 332 | 20206 |
| 499 | M | 1 | 332 | 2     |
| 565 | S | 1 | 310 | 14286 |
| 565 | M | 1 | 310 | 25    |
| 571 | S | 1 | 308 | 18927 |
| 571 | M | 1 | 308 | 4     |
| 586 | M | 1 | 303 | 9006  |
| 586 | W | 1 | 303 | 8548  |
| 586 | S | 1 | 303 | 2660  |
| 605 | W | 2 | 36  | 13790 |
| 605 | W | 2 | 24  | 339   |
| 605 | W | 2 | 40  | 74    |
| 605 | W | 2 | 15  | 40    |
| 605 | W | 2 | 64  | 28    |

|     |   |   |    |       |
|-----|---|---|----|-------|
| 605 | W | 2 | 30 | 11    |
| 605 | W | 2 | 57 | 6     |
| 605 | W | 2 | 35 | 4     |
| 605 | W | 2 | 29 | 1     |
| 605 | W | 2 | 54 | 1     |
| 605 | W | 2 | 96 | 1     |
| 605 | M | 2 | 36 | 1     |
| 605 | W | 2 | 11 | 1     |
| 605 | W | 2 | 14 | 1     |
| 605 | W | 2 | 12 | 1     |
| 605 | W | 2 | 25 | 1     |
| 632 | S | 2 | 27 | 15994 |
| 632 | S | 2 | 31 | 3017  |
| 632 | S | 2 | 15 | 399   |
| 632 | S | 2 | 48 | 176   |
| 632 | S | 2 | 55 | 67    |
| 632 | S | 2 | 6  | 36    |
| 632 | S | 2 | 42 | 28    |
| 632 | S | 2 | 21 | 14    |
| 632 | S | 2 | 28 | 5     |
| 632 | M | 2 | 27 | 4     |
| 632 | S | 2 | 26 | 3     |
| 632 | S | 2 | 87 | 2     |
| 632 | S | 2 | 5  | 2     |
| 632 | S | 2 | 41 | 1     |
| 632 | S | 2 | 45 | 1     |
| 632 | S | 2 | 3  | 1     |
| 632 | S | 2 | 53 | 1     |
| 632 | S | 2 | 2  | 1     |
| 632 | S | 2 | 16 | 1     |
| 632 | S | 2 | 90 | 1     |
| 632 | S | 2 | 20 | 1     |
| 656 | W | 2 | 19 | 12816 |
| 656 | W | 2 | 23 | 2971  |
| 656 | W | 2 | 7  | 409   |
| 656 | W | 2 | 40 | 176   |
| 656 | W | 2 | 47 | 64    |
| 656 | W | 2 | 13 | 9     |
| 656 | W | 2 | 20 | 5     |
| 656 | W | 2 | 18 | 4     |
| 656 | W | 2 | 34 | 3     |
| 656 | W | 2 | 37 | 2     |
| 656 | W | 2 | 79 | 2     |

|     |   |   |     |       |
|-----|---|---|-----|-------|
| 656 | W | 2 | 82  | 1     |
| 656 | W | 2 | 12  | 1     |
| 656 | W | 2 | 45  | 1     |
| 656 | M | 2 | 19  | 1     |
| 656 | W | 2 | 8   | 1     |
| 664 | M | 1 | 277 | 20200 |
| 664 | W | 1 | 277 | 5     |
| 712 | M | 1 | 261 | 16882 |
| 712 | S | 1 | 261 | 3327  |
| 712 | W | 1 | 261 | 2     |
| 715 | S | 1 | 260 | 16875 |
| 715 | M | 1 | 260 | 5     |
| 749 | M | 2 | 16  | 9750  |
| 749 | M | 2 | 14  | 2470  |
| 749 | M | 2 | 9   | 569   |
| 749 | M | 2 | 3   | 360   |
| 749 | M | 2 | 6   | 89    |
| 749 | M | 2 | 51  | 20    |
| 749 | M | 2 | 35  | 16    |
| 749 | M | 2 | 48  | 9     |
| 749 | M | 2 | 2   | 3     |
| 749 | M | 2 | 20  | 2     |
| 749 | W | 2 | 16  | 1     |
| 842 | M | 2 | 4   | 8702  |
| 842 | M | 2 | 20  | 4177  |
| 842 | M | 2 | 17  | 3586  |
| 842 | M | 2 | 60  | 398   |
| 842 | M | 2 | 47  | 72    |
| 842 | M | 2 | 2   | 51    |
| 842 | M | 2 | 18  | 24    |
| 842 | M | 2 | 34  | 15    |
| 842 | M | 2 | 3   | 3     |
| 842 | W | 2 | 17  | 1     |
| 842 | S | 2 | 4   | 1     |
| 866 | M | 2 | 12  | 8087  |
| 866 | M | 2 | 9   | 1905  |
| 866 | M | 2 | 10  | 770   |
| 866 | M | 2 | 26  | 208   |
| 866 | M | 2 | 52  | 195   |
| 866 | M | 2 | 39  | 44    |
| 866 | M | 2 | 24  | 8     |
| 866 | M | 2 | 3   | 3     |
| 866 | W | 2 | 12  | 2     |

|      |   |   |     |       |
|------|---|---|-----|-------|
| 866  | M | 2 | 27  | 1     |
| 946  | W | 1 | 183 | 4743  |
| 946  | M | 1 | 183 | 3     |
| 956  | W | 2 | 22  | 8660  |
| 956  | W | 2 | 9   | 2714  |
| 956  | W | 2 | 62  | 51    |
| 956  | W | 2 | 28  | 16    |
| 956  | W | 2 | 25  | 15    |
| 956  | W | 2 | 12  | 12    |
| 956  | W | 2 | 33  | 7     |
| 956  | M | 2 | 9   | 4     |
| 956  | M | 2 | 22  | 2     |
| 956  | W | 2 | 3   | 1     |
| 956  | W | 2 | 10  | 1     |
| 987  | S | 3 | 9   | 5997  |
| 987  | S | 3 | 39  | 111   |
| 987  | S | 3 | 31  | 20    |
| 987  | M | 3 | 9   | 20    |
| 987  | S | 3 | 18  | 17    |
| 987  | S | 3 | 12  | 2     |
| 987  | S | 3 | 47  | 1     |
| 987  | S | 3 | 15  | 1     |
| 987  | S | 3 | 50  | 1     |
| 987  | M | 3 | 25  | 1     |
| 991  | M | 1 | 168 | 20167 |
| 991  | W | 1 | 168 | 7     |
| 991  | S | 1 | 168 | 3     |
| 996  | M | 3 | 6   | 19129 |
| 996  | M | 3 | 36  | 344   |
| 996  | M | 3 | 28  | 58    |
| 996  | M | 3 | 9   | 40    |
| 996  | M | 3 | 44  | 37    |
| 996  | M | 3 | 15  | 18    |
| 996  | M | 3 | 47  | 13    |
| 996  | W | 3 | 6   | 5     |
| 996  | M | 3 | 147 | 2     |
| 996  | M | 3 | 12  | 1     |
| 996  | M | 3 | 22  | 1     |
| 1103 | W | 2 | 13  | 18108 |
| 1103 | W | 2 | 11  | 853   |
| 1103 | W | 2 | 6   | 508   |
| 1103 | W | 2 | 3   | 233   |
| 1103 | W | 2 | 5   | 161   |



|      |   |   |     |       |
|------|---|---|-----|-------|
| 1103 | W | 2 | 20  | 72    |
| 1103 | W | 2 | 9   | 16    |
| 1103 | M | 2 | 13  | 4     |
| 1103 | M | 2 | 3   | 1     |
| 1103 | M | 2 | 6   | 1     |
| 1109 | M | 2 | 11  | 4939  |
| 1109 | M | 2 | 9   | 791   |
| 1109 | M | 2 | 4   | 24    |
| 1109 | M | 2 | 18  | 2     |
| 1111 | S | 1 | 128 | 13839 |
| 1111 | M | 1 | 128 | 2     |
| 1115 | W | 2 | 9   | 1182  |
| 1115 | W | 2 | 2   | 16    |
| 1115 | W | 2 | 7   | 8     |
| 1115 | W | 2 | 16  | 1     |
| 1115 | M | 2 | 9   | 1     |
| 1120 | S | 1 | 125 | 18404 |
| 1120 | M | 1 | 125 | 164   |
| 1276 | S | 1 | 73  | 19726 |
| 1276 | M | 1 | 73  | 4     |
| 1298 | M | 2 | 12  | 5721  |
| 1298 | M | 2 | 7   | 143   |
| 1298 | M | 2 | 11  | 7     |
| 1298 | M | 2 | 14  | 4     |
| 1298 | W | 2 | 12  | 4     |
| 1298 | M | 2 | 8   | 1     |
| 1298 | W | 2 | 7   | 1     |
| 1298 | S | 2 | 12  | 1     |
| 1318 | M | 1 | 59  | 20204 |
| 1318 | W | 1 | 59  | 3     |
| 1318 | S | 1 | 59  | 2     |
| 1339 | M | 1 | 52  | 20087 |
| 1339 | W | 1 | 52  | 37    |
| 1339 | S | 1 | 52  | 1     |
| 1342 | S | 1 | 51  | 20187 |
| 1342 | M | 1 | 51  | 27    |
| 1349 | M | 2 | 31  | 5304  |
| 1349 | M | 2 | 25  | 5     |
| 1349 | M | 2 | 29  | 3     |
| 1364 | M | 2 | 26  | 8812  |
| 1364 | M | 2 | 20  | 7     |
| 1364 | M | 2 | 24  | 4     |
| 1364 | M | 2 | 17  | 2     |

|      |   |   |    |       |
|------|---|---|----|-------|
| 1441 | M | 1 | 18 | 20106 |
| 1441 | S | 1 | 18 | 5     |
| 1441 | W | 1 | 18 | 2     |

**Table S5. Length and count data for influenza A putative ORFs accompanying Figure S3 (M1).**

| <b>Position</b> | <b>Kozak</b> | <b>Frame</b> | <b>Length</b> | <b>Count</b> |
|-----------------|--------------|--------------|---------------|--------------|
| 1               | W            | 1            | 252           | 28216        |
| 29              | W            | 2            | 36            | 5914         |
| 29              | W            | 2            | 14            | 1457         |
| 29              | W            | 2            | 4             | 44           |
| 29              | W            | 2            | 29            | 12           |
| 29              | W            | 2            | 27            | 8            |
| 29              | W            | 2            | 32            | 6            |
| 29              | W            | 2            | 18            | 1            |
| 29              | M            | 2            | 36            | 1            |
| 89              | M            | 2            | 16            | 19316        |
| 89              | M            | 2            | 9             | 126          |
| 89              | M            | 2            | 12            | 124          |
| 89              | M            | 2            | 7             | 8            |
| 89              | M            | 2            | 25            | 6            |
| 89              | M            | 2            | 3             | 5            |
| 89              | M            | 2            | 13            | 4            |
| 89              | M            | 2            | 54            | 1            |
| 89              | M            | 2            | 2             | 1            |
| 127             | M            | 1            | 210           | 28171        |
| 127             | S            | 1            | 210           | 27           |
| 127             | W            | 1            | 210           | 1            |
| 132             | S            | 3            | 12            | 23198        |
| 132             | S            | 3            | 26            | 314          |
| 132             | S            | 3            | 4             | 2            |
| 132             | M            | 3            | 12            | 2            |
| 132             | S            | 3            | 2             | 1            |
| 245             | M            | 2            | 2             | 12808        |
| 245             | M            | 2            | 25            | 10779        |
| 245             | M            | 2            | 21            | 2718         |
| 245             | M            | 2            | 33            | 517          |
| 245             | M            | 2            | 15            | 383          |
| 245             | M            | 2            | 56            | 60           |
| 245             | M            | 2            | 11            | 9            |
| 245             | M            | 2            | 35            | 1            |
| 245             | W            | 2            | 2             | 1            |
| 254             | M            | 2            | 22            | 18539        |
| 254             | M            | 2            | 18            | 8053         |
| 254             | M            | 2            | 30            | 522          |
| 254             | M            | 2            | 12            | 330          |

|     |   |   |     |       |
|-----|---|---|-----|-------|
| 254 | M | 2 | 53  | 60    |
| 254 | M | 2 | 8   | 40    |
| 254 | M | 2 | 32  | 6     |
| 254 | M | 2 | 10  | 1     |
| 254 | M | 2 | 11  | 1     |
| 254 | W | 2 | 18  | 1     |
| 254 | W | 2 | 22  | 1     |
| 260 | S | 2 | 20  | 18347 |
| 260 | S | 2 | 16  | 8064  |
| 260 | S | 2 | 28  | 520   |
| 260 | S | 2 | 10  | 332   |
| 260 | S | 2 | 51  | 58    |
| 260 | S | 2 | 6   | 40    |
| 260 | M | 2 | 16  | 8     |
| 260 | S | 2 | 30  | 6     |
| 260 | M | 2 | 20  | 1     |
| 260 | S | 2 | 9   | 1     |
| 277 | S | 1 | 160 | 28161 |
| 277 | M | 1 | 160 | 15    |
| 329 | M | 2 | 28  | 9516  |
| 329 | M | 2 | 5   | 9341  |
| 329 | M | 2 | 7   | 7893  |
| 329 | M | 2 | 14  | 313   |
| 329 | M | 2 | 20  | 255   |
| 329 | M | 2 | 56  | 84    |
| 329 | M | 2 | 36  | 83    |
| 329 | S | 2 | 5   | 9     |
| 329 | M | 2 | 55  | 5     |
| 329 | W | 2 | 5   | 4     |
| 329 | S | 2 | 28  | 4     |
| 329 | M | 2 | 62  | 4     |
| 329 | S | 2 | 56  | 2     |
| 329 | W | 2 | 20  | 2     |
| 329 | W | 2 | 28  | 2     |
| 329 | M | 2 | 18  | 2     |
| 329 | M | 2 | 4   | 1     |
| 329 | S | 2 | 7   | 1     |
| 329 | M | 2 | 25  | 1     |
| 329 | M | 2 | 3   | 1     |
| 329 | M | 2 | 2   | 1     |
| 382 | M | 1 | 125 | 28200 |
| 382 | W | 1 | 125 | 3     |
| 382 | S | 1 | 125 | 1     |

|     |   |   |     |       |
|-----|---|---|-----|-------|
| 403 | S | 1 | 118 | 27364 |
| 403 | M | 1 | 118 | 850   |
| 441 | M | 3 | 4   | 8787  |
| 441 | W | 3 | 4   | 1657  |
| 441 | M | 3 | 8   | 72    |
| 441 | W | 3 | 12  | 1     |
| 441 | M | 3 | 39  | 1     |
| 493 | M | 1 | 88  | 28101 |
| 493 | W | 1 | 88  | 84    |
| 493 | S | 1 | 88  | 2     |
| 524 | M | 2 | 41  | 21108 |
| 524 | M | 2 | 6   | 2951  |
| 524 | M | 2 | 5   | 133   |
| 524 | M | 2 | 28  | 47    |
| 524 | M | 2 | 17  | 22    |
| 524 | M | 2 | 30  | 16    |
| 524 | M | 2 | 37  | 11    |
| 524 | W | 2 | 41  | 3     |
| 524 | M | 2 | 36  | 3     |
| 524 | M | 2 | 20  | 2     |
| 524 | M | 2 | 25  | 2     |
| 524 | M | 2 | 54  | 2     |
| 524 | S | 2 | 41  | 1     |
| 524 | M | 2 | 14  | 1     |
| 524 | M | 2 | 10  | 1     |
| 524 | M | 2 | 38  | 1     |
| 524 | M | 2 | 24  | 1     |
| 535 | S | 1 | 74  | 28183 |
| 535 | M | 1 | 74  | 31    |
| 565 | S | 1 | 64  | 28209 |
| 565 | M | 1 | 64  | 1     |
| 574 | M | 1 | 61  | 27551 |
| 574 | W | 1 | 61  | 3     |
| 574 | S | 1 | 61  | 1     |
| 607 | S | 1 | 50  | 28137 |
| 607 | M | 1 | 50  | 14    |
| 634 | M | 1 | 41  | 27900 |
| 634 | W | 1 | 41  | 279   |
| 634 | S | 1 | 41  | 33    |
| 641 | W | 2 | 2   | 7966  |
| 646 | M | 1 | 37  | 28212 |
| 646 | W | 1 | 37  | 1     |
| 730 | M | 1 | 9   | 27884 |

|     |   |   |   |       |
|-----|---|---|---|-------|
| 730 | S | 1 | 9 | 320   |
| 742 | W | 1 | 5 | 27111 |
| 742 | M | 1 | 5 | 1     |

**Table S6. Length and count data for influenza A putative ORFs accompanying Figure S4 (M2).**

| <b>Position</b> | <b>Kozak</b> | <b>Frame</b> | <b>Length</b> | <b>Count</b> |
|-----------------|--------------|--------------|---------------|--------------|
| 1               | W            | 1            | 97            | 24218        |
| 42              | M            | 3            | 9             | 23922        |
| 42              | S            | 3            | 9             | 287          |
| 42              | M            | 3            | 13            | 1            |
| 54              | W            | 3            | 5             | 23265        |
| 54              | W            | 3            | 9             | 1            |
| 54              | M            | 3            | 5             | 1            |
| 147             | W            | 3            | 6             | 17366        |
| 147             | W            | 3            | 10            | 3323         |
| 147             | W            | 3            | 20            | 1436         |
| 147             | W            | 3            | 37            | 41           |
| 147             | W            | 3            | 4             | 16           |
| 147             | M            | 3            | 6             | 10           |
| 147             | M            | 3            | 10            | 8            |
| 147             | W            | 3            | 2             | 2            |
| 147             | W            | 3            | 3             | 1            |
| 214             | W            | 1            | 26            | 24197        |
| 214             | M            | 1            | 26            | 1            |
| 245             | M            | 2            | 12            | 7950         |
| 245             | M            | 2            | 2             | 56           |
| 245             | W            | 2            | 12            | 3            |
| 245             | M            | 2            | 9             | 2            |
| 245             | M            | 2            | 10            | 2            |
| 245             | S            | 2            | 12            | 1            |
| 254             | W            | 2            | 9             | 23960        |
| 254             | M            | 2            | 9             | 27           |
| 254             | W            | 2            | 11            | 19           |
| 254             | W            | 2            | 6             | 17           |
| 254             | W            | 2            | 7             | 4            |
| 263             | S            | 2            | 6             | 17459        |
| 263             | M            | 2            | 6             | 1102         |
| 263             | S            | 2            | 8             | 18           |
| 263             | S            | 2            | 3             | 17           |
| 263             | S            | 2            | 4             | 3            |

**Table S7. Length and count data for influenza A putative ORFs accompanying Figure S5 (M42).**

| <b>Position</b> | <b>Kozak</b> | <b>Frame</b> | <b>Length</b> | <b>Count</b> |
|-----------------|--------------|--------------|---------------|--------------|
| 1               | W            | 1            | 99            | 18211        |
| 1               | W            | 1            | 9             | 124          |
| 1               | W            | 1            | 7             | 7            |
| 1               | W            | 1            | 3             | 5            |
| 1               | W            | 1            | 2             | 1            |
| 1               | W            | 1            | 98            | 1            |
| 48              | M            | 3            | 9             | 18095        |
| 48              | S            | 3            | 9             | 245          |
| 60              | W            | 3            | 5             | 17564        |
| 153             | W            | 3            | 6             | 10785        |
| 153             | W            | 3            | 10            | 4064         |
| 153             | W            | 3            | 20            | 1420         |
| 153             | W            | 3            | 37            | 17           |
| 153             | M            | 3            | 6             | 9            |
| 153             | M            | 3            | 10            | 8            |
| 153             | W            | 3            | 4             | 5            |
| 153             | W            | 3            | 2             | 1            |
| 220             | W            | 1            | 26            | 18333        |
| 220             | M            | 1            | 26            | 1            |
| 220             | W            | 1            | 25            | 1            |
| 251             | M            | 2            | 12            | 8743         |
| 251             | M            | 2            | 2             | 67           |
| 251             | W            | 2            | 12            | 3            |
| 251             | M            | 2            | 9             | 2            |
| 251             | M            | 2            | 10            | 2            |
| 251             | S            | 2            | 12            | 1            |
| 260             | W            | 2            | 9             | 18090        |
| 260             | M            | 2            | 9             | 27           |
| 260             | W            | 2            | 6             | 18           |
| 260             | W            | 2            | 11            | 11           |
| 260             | W            | 2            | 7             | 4            |
| 269             | S            | 2            | 6             | 10853        |
| 269             | M            | 2            | 6             | 1106         |
| 269             | S            | 2            | 3             | 18           |
| 269             | S            | 2            | 8             | 10           |
| 269             | S            | 2            | 4             | 3            |



**Table S8. Length and count data for influenza A putative ORFs accompanying Figure S6 (NS1).**

| <b>Position</b> | <b>Kozak</b> | <b>Frame</b> | <b>Length</b> | <b>Count</b> |
|-----------------|--------------|--------------|---------------|--------------|
| 1               | W            | 1            | 230           | 13338        |
| 1               | W            | 1            | 219           | 6419         |
| 1               | W            | 1            | 225           | 2080         |
| 1               | W            | 1            | 217           | 1288         |
| 16              | M            | 1            | 214           | 5097         |
| 16              | M            | 1            | 225           | 134          |
| 16              | M            | 1            | 212           | 13           |
| 16              | M            | 1            | 220           | 3            |
| 16              | W            | 1            | 214           | 2            |
| 45              | M            | 3            | 13            | 2198         |
| 45              | M            | 3            | 7             | 3            |
| 45              | M            | 3            | 18            | 3            |
| 45              | M            | 3            | 10            | 1            |
| 45              | M            | 3            | 17            | 1            |
| 45              | M            | 3            | 3             | 1            |
| 50              | M            | 2            | 26            | 8026         |
| 50              | M            | 2            | 10            | 1332         |
| 50              | M            | 2            | 16            | 917          |
| 50              | M            | 2            | 6             | 61           |
| 50              | M            | 2            | 47            | 27           |
| 50              | W            | 2            | 26            | 4            |
| 50              | M            | 2            | 5             | 2            |
| 50              | M            | 2            | 35            | 2            |
| 50              | M            | 2            | 52            | 1            |
| 50              | W            | 2            | 16            | 1            |
| 50              | M            | 2            | 8             | 1            |
| 70              | M            | 1            | 207           | 2292         |
| 70              | M            | 1            | 194           | 2            |
| 74              | S            | 2            | 18            | 6305         |
| 74              | S            | 2            | 2             | 27           |
| 74              | S            | 2            | 44            | 8            |
| 74              | S            | 2            | 8             | 7            |
| 74              | M            | 2            | 18            | 6            |
| 74              | S            | 2            | 13            | 1            |
| 79              | M            | 1            | 204           | 2384         |
| 79              | S            | 1            | 204           | 545          |
| 79              | S            | 1            | 191           | 158          |
| 79              | S            | 1            | 199           | 45           |
| 79              | S            | 1            | 193           | 7            |

|     |   |   |     |       |
|-----|---|---|-----|-------|
| 79  | M | 1 | 193 | 5     |
| 79  | M | 1 | 191 | 2     |
| 86  | M | 2 | 14  | 22031 |
| 86  | M | 2 | 4   | 983   |
| 86  | M | 2 | 35  | 27    |
| 86  | M | 2 | 40  | 8     |
| 86  | W | 2 | 14  | 6     |
| 86  | M | 2 | 7   | 4     |
| 86  | M | 2 | 23  | 4     |
| 86  | M | 2 | 9   | 1     |
| 98  | W | 2 | 10  | 2300  |
| 98  | W | 2 | 3   | 4     |
| 175 | S | 1 | 172 | 2225  |
| 175 | M | 1 | 172 | 4     |
| 175 | S | 1 | 159 | 2     |
| 176 | W | 2 | 6   | 3670  |
| 176 | W | 2 | 5   | 745   |
| 176 | W | 2 | 10  | 6     |
| 176 | W | 2 | 20  | 3     |
| 176 | W | 2 | 4   | 2     |
| 176 | W | 2 | 26  | 1     |
| 198 | S | 3 | 11  | 5087  |
| 198 | S | 3 | 25  | 52    |
| 198 | S | 3 | 8   | 14    |
| 198 | M | 3 | 11  | 7     |
| 198 | S | 3 | 5   | 7     |
| 198 | M | 3 | 7   | 3     |
| 198 | S | 3 | 7   | 2     |
| 221 | W | 2 | 5   | 9155  |
| 221 | W | 2 | 19  | 1793  |
| 221 | W | 2 | 11  | 1521  |
| 221 | M | 2 | 5   | 287   |
| 221 | W | 2 | 3   | 192   |
| 221 | W | 2 | 16  | 146   |
| 221 | M | 2 | 19  | 59    |
| 221 | M | 2 | 11  | 6     |
| 221 | M | 2 | 16  | 2     |
| 221 | W | 2 | 7   | 2     |
| 221 | M | 2 | 4   | 1     |
| 221 | W | 2 | 6   | 1     |
| 221 | W | 2 | 37  | 1     |
| 221 | W | 2 | 21  | 1     |
| 221 | W | 2 | 14  | 1     |

|     |   |   |     |       |
|-----|---|---|-----|-------|
| 235 | M | 1 | 152 | 10786 |
| 235 | M | 1 | 141 | 6346  |
| 235 | M | 1 | 147 | 2007  |
| 235 | M | 1 | 139 | 1120  |
| 235 | S | 1 | 152 | 57    |
| 235 | S | 1 | 141 | 38    |
| 235 | S | 1 | 139 | 33    |
| 235 | W | 1 | 152 | 9     |
| 235 | W | 1 | 141 | 1     |
| 241 | S | 1 | 150 | 5106  |
| 241 | S | 1 | 137 | 14    |
| 241 | M | 1 | 150 | 4     |
| 277 | M | 1 | 138 | 15402 |
| 277 | M | 1 | 127 | 6157  |
| 277 | M | 1 | 125 | 1287  |
| 277 | S | 1 | 127 | 15    |
| 277 | S | 1 | 138 | 5     |
| 277 | S | 1 | 125 | 1     |
| 292 | M | 1 | 133 | 9107  |
| 292 | M | 1 | 122 | 6405  |
| 292 | M | 1 | 120 | 1272  |
| 292 | S | 1 | 133 | 3     |
| 292 | S | 1 | 122 | 1     |
| 303 | S | 3 | 37  | 1734  |
| 303 | S | 3 | 6   | 370   |
| 303 | S | 3 | 24  | 218   |
| 303 | S | 3 | 51  | 61    |
| 303 | S | 3 | 57  | 51    |
| 303 | S | 3 | 16  | 39    |
| 303 | S | 3 | 29  | 12    |
| 303 | S | 3 | 8   | 3     |
| 303 | S | 3 | 31  | 2     |
| 303 | M | 3 | 37  | 1     |
| 303 | S | 3 | 14  | 1     |
| 303 | S | 3 | 46  | 1     |
| 303 | S | 3 | 23  | 1     |
| 310 | W | 1 | 127 | 15393 |
| 310 | W | 1 | 116 | 6396  |
| 310 | W | 1 | 114 | 1284  |
| 310 | M | 1 | 127 | 4     |
| 310 | M | 1 | 116 | 3     |
| 310 | M | 1 | 114 | 3     |
| 316 | W | 1 | 125 | 15157 |

|     |   |   |     |       |
|-----|---|---|-----|-------|
| 316 | W | 1 | 114 | 6357  |
| 316 | W | 1 | 112 | 440   |
| 316 | M | 1 | 125 | 19    |
| 316 | M | 1 | 114 | 3     |
| 346 | M | 1 | 115 | 2195  |
| 346 | W | 1 | 115 | 6     |
| 346 | M | 1 | 102 | 1     |
| 355 | S | 1 | 112 | 15295 |
| 355 | S | 1 | 99  | 1222  |
| 355 | M | 1 | 101 | 1045  |
| 355 | S | 1 | 101 | 103   |
| 355 | M | 1 | 112 | 34    |
| 355 | M | 1 | 99  | 11    |
| 370 | S | 1 | 107 | 14818 |
| 370 | S | 1 | 96  | 6171  |
| 370 | S | 1 | 94  | 764   |
| 370 | M | 1 | 107 | 334   |
| 370 | M | 1 | 94  | 3     |
| 370 | M | 1 | 96  | 2     |
| 385 | M | 1 | 102 | 3749  |
| 385 | M | 1 | 91  | 12    |
| 385 | M | 1 | 89  | 8     |
| 385 | W | 1 | 102 | 1     |
| 458 | S | 2 | 4   | 1879  |
| 458 | S | 2 | 3   | 9     |
| 458 | M | 2 | 4   | 7     |
| 458 | S | 2 | 6   | 4     |
| 496 | W | 1 | 65  | 2263  |
| 496 | W | 1 | 52  | 1     |
| 558 | M | 3 | 2   | 16506 |
| 558 | M | 3 | 3   | 6392  |
| 558 | S | 3 | 2   | 7     |
| 558 | S | 3 | 3   | 7     |
| 664 | S | 1 | 9   | 12803 |
| 664 | M | 1 | 9   | 2349  |

**Table S9. Length and count data for influenza A putative ORFs accompanying Figure S7 (NS2).**

| <b>Position</b> | <b>Kozak</b> | <b>Frame</b> | <b>Length</b> | <b>Count</b> |
|-----------------|--------------|--------------|---------------|--------------|
| 1               | W            | 1            | 121           | 21536        |
| 16              | M            | 1            | 116           | 4850         |
| 16              | W            | 1            | 116           | 1            |
| 40              | W            | 1            | 108           | 12887        |
| 40              | M            | 1            | 108           | 39           |
| 46              | M            | 1            | 106           | 21504        |
| 55              | M            | 1            | 103           | 21452        |
| 55              | S            | 1            | 103           | 1            |
| 86              | M            | 2            | 2             | 15425        |
| 86              | M            | 2            | 3             | 5915         |
| 86              | S            | 2            | 2             | 7            |
| 86              | S            | 2            | 3             | 5            |
| 91              | M            | 1            | 91            | 15428        |
| 91              | S            | 1            | 91            | 5934         |
| 148             | M            | 1            | 72            | 20849        |
| 148             | W            | 1            | 72            | 570          |
| 154             | S            | 1            | 70            | 19118        |
| 154             | M            | 1            | 70            | 27           |
| 185             | M            | 2            | 14            | 5816         |
| 185             | S            | 2            | 7             | 415          |
| 185             | M            | 2            | 7             | 114          |
| 185             | S            | 2            | 14            | 44           |
| 185             | M            | 2            | 17            | 10           |
| 185             | W            | 2            | 14            | 1            |
| 185             | M            | 2            | 11            | 1            |
| 192             | S            | 3            | 9             | 12036        |
| 192             | M            | 3            | 9             | 2244         |
| 192             | S            | 3            | 16            | 1058         |
| 192             | S            | 3            | 7             | 41           |
| 192             | M            | 3            | 16            | 32           |
| 192             | M            | 3            | 3             | 21           |
| 192             | S            | 3            | 2             | 4            |
| 192             | S            | 3            | 21            | 1            |
| 192             | M            | 3            | 17            | 1            |
| 231             | S            | 3            | 3             | 8593         |
| 231             | M            | 3            | 13            | 1561         |
| 231             | M            | 3            | 4             | 274          |
| 231             | M            | 3            | 6             | 132          |
| 231             | S            | 3            | 8             | 102          |

|     |   |   |    |       |
|-----|---|---|----|-------|
| 231 | M | 3 | 11 | 15    |
| 231 | M | 3 | 3  | 13    |
| 231 | M | 3 | 30 | 9     |
| 231 | S | 3 | 13 | 7     |
| 231 | S | 3 | 30 | 2     |
| 231 | M | 3 | 8  | 2     |
| 231 | S | 3 | 15 | 2     |
| 231 | M | 3 | 32 | 1     |
| 231 | S | 3 | 4  | 1     |
| 231 | M | 3 | 17 | 1     |
| 246 | M | 3 | 8  | 871   |
| 246 | W | 3 | 8  | 203   |
| 246 | W | 3 | 12 | 11    |
| 246 | W | 3 | 6  | 10    |
| 246 | M | 3 | 6  | 10    |
| 246 | M | 3 | 25 | 6     |
| 246 | W | 3 | 10 | 4     |
| 246 | M | 3 | 27 | 1     |
| 247 | M | 1 | 39 | 4838  |
| 298 | W | 1 | 22 | 19232 |

**Table S10. Length and count data for influenza A putative ORFs accompanying Figure S8 (NS3).**

| <b>Position</b> | <b>Kozak</b> | <b>Frame</b> | <b>Length</b> | <b>Count</b> |
|-----------------|--------------|--------------|---------------|--------------|
| 1               | W            | 1            | 194           | 512          |
| 50              | M            | 2            | 6             | 263          |
| 50              | M            | 2            | 10            | 184          |
| 50              | M            | 2            | 26            | 10           |
| 50              | M            | 2            | 16            | 1            |
| 86              | M            | 2            | 14            | 509          |
| 86              | M            | 2            | 4             | 1            |
| 176             | W            | 2            | 5             | 204          |
| 176             | W            | 2            | 6             | 9            |
| 221             | W            | 2            | 5             | 496          |
| 221             | W            | 2            | 16            | 13           |
| 221             | M            | 2            | 5             | 1            |
| 221             | W            | 2            | 3             | 1            |
| 235             | M            | 1            | 116           | 508          |
| 235             | W            | 1            | 116           | 2            |
| 241             | S            | 1            | 114           | 486          |
| 241             | M            | 1            | 114           | 12           |
| 277             | M            | 1            | 102           | 511          |
| 277             | S            | 1            | 102           | 1            |
| 292             | M            | 1            | 97            | 207          |
| 310             | W            | 1            | 91            | 512          |
| 316             | W            | 1            | 89            | 512          |
| 355             | S            | 1            | 76            | 308          |
| 370             | S            | 1            | 71            | 493          |
| 370             | M            | 1            | 71            | 18           |
| 429             | M            | 3            | 2             | 511          |
| 535             | S            | 1            | 16            | 511          |
| 574             | S            | 1            | 3             | 508          |
| 574             | M            | 1            | 3             | 1            |

**Table S11. Length and count data for influenza A putative ORFs accompanying Figure S9 (H1).**

| <b>Position</b> | <b>Kozak</b> | <b>Frame</b> | <b>Length</b> | <b>Count</b> |
|-----------------|--------------|--------------|---------------|--------------|
| 1               | W            | 1            | 566           | 11238        |
| 47              | W            | 2            | 6             | 10317        |
| 47              | M            | 2            | 6             | 73           |
| 47              | W            | 2            | 21            | 42           |
| 47              | W            | 2            | 17            | 9            |
| 47              | M            | 2            | 21            | 1            |
| 47              | W            | 2            | 4             | 1            |
| 47              | W            | 2            | 25            | 1            |
| 60              | M            | 3            | 27            | 9114         |
| 60              | M            | 3            | 10            | 533          |
| 60              | M            | 3            | 7             | 488          |
| 60              | M            | 3            | 13            | 233          |
| 60              | M            | 3            | 34            | 87           |
| 60              | M            | 3            | 6             | 7            |
| 60              | W            | 3            | 7             | 3            |
| 60              | W            | 3            | 27            | 2            |
| 60              | W            | 3            | 10            | 1            |
| 60              | M            | 3            | 12            | 1            |
| 60              | W            | 3            | 13            | 1            |
| 60              | W            | 3            | 30            | 1            |
| 60              | M            | 3            | 17            | 1            |
| 74              | M            | 2            | 8             | 9699         |
| 74              | M            | 2            | 16            | 916          |
| 74              | M            | 2            | 12            | 573          |
| 74              | M            | 2            | 11            | 6            |
| 74              | M            | 2            | 25            | 5            |
| 74              | M            | 2            | 18            | 3            |
| 74              | W            | 2            | 8             | 2            |
| 74              | S            | 2            | 8             | 2            |
| 74              | S            | 2            | 12            | 1            |
| 164             | S            | 2            | 6             | 1238         |
| 164             | S            | 2            | 9             | 4            |
| 164             | M            | 2            | 6             | 4            |
| 174             | M            | 3            | 12            | 9383         |
| 174             | M            | 3            | 31            | 94           |
| 174             | M            | 3            | 14            | 60           |
| 174             | M            | 3            | 26            | 14           |
| 174             | M            | 3            | 57            | 2            |
| 174             | M            | 3            | 55            | 1            |



|     |   |   |    |       |
|-----|---|---|----|-------|
| 185 | M | 2 | 2  | 372   |
| 185 | M | 2 | 12 | 205   |
| 185 | M | 2 | 34 | 5     |
| 185 | M | 2 | 7  | 3     |
| 228 | S | 3 | 8  | 609   |
| 228 | M | 3 | 8  | 504   |
| 228 | M | 3 | 13 | 216   |
| 228 | M | 3 | 39 | 23    |
| 228 | M | 3 | 26 | 20    |
| 228 | M | 3 | 24 | 16    |
| 228 | M | 3 | 27 | 10    |
| 228 | S | 3 | 37 | 7     |
| 228 | M | 3 | 14 | 4     |
| 228 | M | 3 | 21 | 3     |
| 228 | S | 3 | 4  | 3     |
| 228 | S | 3 | 34 | 2     |
| 228 | M | 3 | 6  | 2     |
| 228 | S | 3 | 6  | 1     |
| 228 | M | 3 | 52 | 1     |
| 228 | S | 3 | 39 | 1     |
| 276 | M | 3 | 8  | 9830  |
| 276 | M | 3 | 23 | 404   |
| 276 | M | 3 | 18 | 375   |
| 276 | S | 3 | 10 | 155   |
| 276 | S | 3 | 23 | 98    |
| 276 | M | 3 | 21 | 73    |
| 276 | S | 3 | 8  | 23    |
| 276 | M | 3 | 11 | 14    |
| 276 | M | 3 | 5  | 13    |
| 276 | M | 3 | 10 | 10    |
| 276 | S | 3 | 5  | 5     |
| 276 | M | 3 | 36 | 5     |
| 276 | S | 3 | 21 | 3     |
| 276 | S | 3 | 18 | 3     |
| 276 | S | 3 | 36 | 1     |
| 276 | M | 3 | 12 | 1     |
| 311 | S | 2 | 14 | 10718 |
| 311 | S | 2 | 18 | 59    |
| 311 | S | 2 | 9  | 56    |
| 311 | M | 2 | 14 | 3     |
| 311 | M | 2 | 9  | 1     |
| 311 | S | 2 | 8  | 1     |
| 318 | M | 3 | 9  | 833   |

|     |   |   |     |       |
|-----|---|---|-----|-------|
| 318 | M | 3 | 4   | 381   |
| 318 | M | 3 | 7   | 276   |
| 318 | M | 3 | 22  | 7     |
| 318 | M | 3 | 6   | 3     |
| 318 | M | 3 | 25  | 2     |
| 318 | W | 3 | 9   | 2     |
| 318 | W | 3 | 4   | 1     |
| 344 | M | 2 | 3   | 11158 |
| 344 | M | 2 | 7   | 59    |
| 344 | S | 2 | 3   | 5     |
| 344 | W | 2 | 3   | 1     |
| 417 | M | 3 | 4   | 10663 |
| 417 | M | 3 | 16  | 168   |
| 417 | M | 3 | 2   | 36    |
| 417 | S | 3 | 16  | 32    |
| 417 | M | 3 | 30  | 14    |
| 417 | S | 3 | 61  | 13    |
| 417 | M | 3 | 61  | 12    |
| 417 | M | 3 | 44  | 9     |
| 417 | S | 3 | 46  | 7     |
| 417 | M | 3 | 46  | 5     |
| 417 | M | 3 | 7   | 4     |
| 417 | M | 3 | 37  | 4     |
| 417 | M | 3 | 20  | 4     |
| 417 | S | 3 | 4   | 3     |
| 417 | M | 3 | 40  | 2     |
| 417 | M | 3 | 120 | 2     |
| 417 | M | 3 | 15  | 1     |
| 417 | M | 3 | 11  | 1     |
| 417 | S | 3 | 2   | 1     |
| 417 | M | 3 | 233 | 1     |
| 417 | M | 3 | 84  | 1     |
| 417 | M | 3 | 23  | 1     |
| 428 | M | 2 | 6   | 10081 |
| 428 | M | 2 | 25  | 685   |
| 428 | M | 2 | 22  | 122   |
| 428 | M | 2 | 2   | 30    |
| 428 | M | 2 | 8   | 4     |
| 428 | W | 2 | 6   | 4     |
| 428 | M | 2 | 26  | 3     |
| 428 | M | 2 | 4   | 2     |
| 428 | M | 2 | 12  | 1     |
| 428 | S | 2 | 6   | 1     |

|     |   |   |     |       |
|-----|---|---|-----|-------|
| 456 | M | 3 | 17  | 9109  |
| 456 | M | 3 | 31  | 710   |
| 456 | M | 3 | 3   | 250   |
| 456 | W | 3 | 24  | 234   |
| 456 | M | 3 | 33  | 96    |
| 456 | W | 3 | 17  | 94    |
| 456 | M | 3 | 7   | 78    |
| 456 | W | 3 | 6   | 59    |
| 456 | M | 3 | 27  | 44    |
| 456 | M | 3 | 10  | 25    |
| 456 | M | 3 | 48  | 25    |
| 456 | W | 3 | 33  | 24    |
| 456 | W | 3 | 51  | 17    |
| 456 | M | 3 | 26  | 14    |
| 456 | M | 3 | 4   | 11    |
| 456 | W | 3 | 7   | 8     |
| 456 | M | 3 | 2   | 6     |
| 456 | M | 3 | 24  | 5     |
| 456 | W | 3 | 49  | 3     |
| 456 | W | 3 | 60  | 3     |
| 456 | W | 3 | 3   | 3     |
| 456 | M | 3 | 20  | 2     |
| 456 | M | 3 | 107 | 2     |
| 456 | W | 3 | 31  | 1     |
| 456 | M | 3 | 6   | 1     |
| 456 | M | 3 | 13  | 1     |
| 456 | W | 3 | 10  | 1     |
| 456 | M | 3 | 71  | 1     |
| 456 | M | 3 | 220 | 1     |
| 464 | W | 2 | 10  | 10014 |
| 464 | W | 2 | 13  | 42    |
| 464 | W | 2 | 3   | 22    |
| 464 | W | 2 | 14  | 12    |
| 464 | M | 2 | 10  | 5     |
| 464 | M | 2 | 13  | 5     |
| 464 | W | 2 | 28  | 1     |
| 464 | W | 2 | 76  | 1     |
| 498 | S | 3 | 3   | 9222  |
| 498 | S | 3 | 17  | 814   |
| 498 | S | 3 | 10  | 256   |
| 498 | S | 3 | 34  | 192   |
| 498 | S | 3 | 19  | 104   |
| 498 | S | 3 | 13  | 59    |

|     |   |   |     |      |
|-----|---|---|-----|------|
| 498 | S | 3 | 12  | 13   |
| 498 | S | 3 | 44  | 5    |
| 498 | S | 3 | 21  | 4    |
| 498 | M | 3 | 3   | 4    |
| 498 | S | 3 | 37  | 3    |
| 498 | S | 3 | 6   | 3    |
| 498 | S | 3 | 57  | 3    |
| 498 | S | 3 | 35  | 3    |
| 498 | S | 3 | 16  | 2    |
| 498 | S | 3 | 93  | 2    |
| 498 | M | 3 | 17  | 1    |
| 498 | M | 3 | 206 | 1    |
| 551 | W | 2 | 47  | 8978 |
| 551 | W | 2 | 7   | 76   |
| 551 | W | 2 | 34  | 19   |
| 551 | W | 2 | 49  | 19   |
| 551 | W | 2 | 28  | 15   |
| 551 | W | 2 | 8   | 7    |
| 551 | W | 2 | 43  | 2    |
| 551 | M | 2 | 47  | 1    |
| 551 | W | 2 | 35  | 1    |
| 551 | W | 2 | 18  | 1    |
| 551 | W | 2 | 5   | 1    |
| 579 | S | 3 | 8   | 7808 |
| 579 | S | 3 | 10  | 1377 |
| 579 | S | 3 | 7   | 282  |
| 579 | S | 3 | 99  | 259  |
| 579 | S | 3 | 42  | 82   |
| 579 | S | 3 | 9   | 50   |
| 579 | S | 3 | 30  | 27   |
| 579 | S | 3 | 34  | 17   |
| 579 | S | 3 | 87  | 10   |
| 579 | M | 3 | 10  | 9    |
| 579 | S | 3 | 150 | 8    |
| 579 | S | 3 | 17  | 7    |
| 579 | S | 3 | 18  | 7    |
| 579 | M | 3 | 9   | 6    |
| 579 | S | 3 | 66  | 5    |
| 579 | M | 3 | 7   | 3    |
| 579 | S | 3 | 97  | 3    |
| 579 | S | 3 | 81  | 2    |
| 579 | S | 3 | 31  | 2    |
| 579 | S | 3 | 85  | 2    |

|     |   |   |     |       |
|-----|---|---|-----|-------|
| 579 | M | 3 | 8   | 2     |
| 579 | S | 3 | 92  | 2     |
| 579 | S | 3 | 179 | 1     |
| 579 | S | 3 | 13  | 1     |
| 579 | S | 3 | 93  | 1     |
| 579 | S | 3 | 36  | 1     |
| 579 | S | 3 | 62  | 1     |
| 579 | S | 3 | 28  | 1     |
| 632 | M | 2 | 20  | 10024 |
| 632 | M | 2 | 7   | 215   |
| 632 | M | 2 | 22  | 19    |
| 632 | M | 2 | 26  | 13    |
| 632 | M | 2 | 8   | 11    |
| 632 | M | 2 | 16  | 4     |
| 632 | M | 2 | 33  | 2     |
| 632 | M | 2 | 14  | 2     |
| 632 | W | 2 | 20  | 1     |
| 632 | S | 2 | 20  | 1     |
| 632 | M | 2 | 10  | 1     |
| 638 | W | 2 | 18  | 9434  |
| 638 | M | 2 | 5   | 183   |
| 638 | W | 2 | 5   | 174   |
| 638 | M | 2 | 18  | 66    |
| 638 | W | 2 | 20  | 9     |
| 638 | W | 2 | 24  | 9     |
| 638 | M | 2 | 24  | 4     |
| 638 | W | 2 | 6   | 2     |
| 638 | W | 2 | 14  | 2     |
| 638 | W | 2 | 31  | 2     |
| 638 | W | 2 | 8   | 1     |
| 638 | W | 2 | 12  | 1     |
| 644 | W | 2 | 16  | 10395 |
| 644 | W | 2 | 3   | 419   |
| 644 | W | 2 | 18  | 19    |
| 644 | W | 2 | 22  | 13    |
| 644 | W | 2 | 4   | 11    |
| 644 | W | 2 | 12  | 4     |
| 644 | W | 2 | 29  | 2     |
| 644 | W | 2 | 10  | 2     |
| 644 | M | 2 | 16  | 1     |
| 644 | W | 2 | 2   | 1     |
| 644 | W | 2 | 6   | 1     |
| 730 | M | 1 | 323 | 10795 |

|     |   |   |     |      |
|-----|---|---|-----|------|
| 730 | S | 1 | 323 | 136  |
| 804 | S | 3 | 7   | 672  |
| 804 | S | 3 | 10  | 219  |
| 804 | S | 3 | 37  | 17   |
| 804 | S | 3 | 36  | 9    |
| 804 | S | 3 | 53  | 5    |
| 804 | M | 3 | 7   | 4    |
| 804 | S | 3 | 56  | 3    |
| 804 | S | 3 | 24  | 2    |
| 804 | S | 3 | 22  | 2    |
| 809 | M | 2 | 33  | 9128 |
| 809 | M | 2 | 4   | 1598 |
| 809 | M | 2 | 5   | 45   |
| 809 | M | 2 | 13  | 32   |
| 809 | M | 2 | 3   | 12   |
| 809 | M | 2 | 18  | 3    |
| 809 | W | 2 | 4   | 3    |
| 809 | W | 2 | 33  | 3    |
| 809 | M | 2 | 15  | 1    |
| 809 | M | 2 | 30  | 1    |
| 809 | M | 2 | 54  | 1    |
| 809 | M | 2 | 19  | 1    |
| 809 | M | 2 | 2   | 1    |
| 809 | M | 2 | 6   | 1    |
| 820 | S | 1 | 293 | 9281 |
| 820 | M | 1 | 293 | 484  |
| 820 | W | 1 | 293 | 3    |
| 830 | M | 2 | 26  | 9183 |
| 830 | M | 2 | 6   | 11   |
| 830 | M | 2 | 11  | 3    |
| 830 | W | 2 | 26  | 2    |
| 830 | S | 2 | 26  | 2    |
| 830 | M | 2 | 47  | 1    |
| 830 | M | 2 | 12  | 1    |
| 857 | W | 2 | 17  | 963  |
| 857 | W | 2 | 43  | 43   |
| 857 | W | 2 | 38  | 11   |
| 857 | W | 2 | 11  | 1    |
| 857 | M | 2 | 17  | 1    |
| 899 | M | 2 | 3   | 842  |
| 899 | M | 2 | 29  | 36   |
| 899 | M | 2 | 24  | 14   |
| 932 | M | 2 | 18  | 613  |

|      |   |   |     |      |
|------|---|---|-----|------|
| 932  | M | 2 | 6   | 183  |
| 932  | M | 2 | 13  | 119  |
| 932  | M | 2 | 4   | 8    |
| 957  | M | 3 | 24  | 9576 |
| 957  | M | 3 | 35  | 520  |
| 957  | M | 3 | 8   | 385  |
| 957  | M | 3 | 5   | 257  |
| 957  | M | 3 | 2   | 133  |
| 957  | W | 3 | 35  | 16   |
| 957  | M | 3 | 53  | 12   |
| 957  | W | 3 | 24  | 9    |
| 957  | M | 3 | 7   | 5    |
| 957  | W | 3 | 5   | 1    |
| 957  | W | 3 | 8   | 1    |
| 957  | W | 3 | 53  | 1    |
| 968  | M | 2 | 6   | 1202 |
| 968  | M | 2 | 12  | 4    |
| 991  | S | 1 | 236 | 1976 |
| 991  | M | 1 | 236 | 5    |
| 1010 | M | 2 | 25  | 8847 |
| 1010 | M | 2 | 24  | 430  |
| 1010 | M | 2 | 45  | 102  |
| 1010 | M | 2 | 17  | 7    |
| 1010 | W | 2 | 25  | 2    |
| 1010 | M | 2 | 59  | 1    |
| 1010 | M | 2 | 10  | 1    |
| 1071 | S | 3 | 15  | 1051 |
| 1071 | S | 3 | 32  | 128  |
| 1071 | S | 3 | 5   | 56   |
| 1071 | S | 3 | 33  | 18   |
| 1071 | S | 3 | 23  | 16   |
| 1071 | M | 3 | 15  | 4    |
| 1071 | S | 3 | 13  | 1    |
| 1071 | S | 3 | 36  | 1    |
| 1081 | S | 1 | 206 | 9342 |
| 1081 | M | 1 | 206 | 1885 |
| 1088 | M | 2 | 19  | 9725 |
| 1088 | M | 2 | 33  | 987  |
| 1088 | M | 2 | 29  | 444  |
| 1088 | M | 2 | 26  | 22   |
| 1088 | M | 2 | 36  | 7    |
| 1088 | M | 2 | 40  | 3    |
| 1088 | M | 2 | 8   | 1    |

|      |   |   |     |       |
|------|---|---|-----|-------|
| 1092 | M | 3 | 8   | 10470 |
| 1092 | M | 3 | 25  | 195   |
| 1092 | M | 3 | 16  | 28    |
| 1092 | M | 3 | 6   | 6     |
| 1092 | S | 3 | 8   | 5     |
| 1092 | M | 3 | 26  | 3     |
| 1092 | M | 3 | 29  | 1     |
| 1097 | S | 2 | 30  | 634   |
| 1097 | S | 2 | 26  | 431   |
| 1097 | S | 2 | 16  | 68    |
| 1097 | S | 2 | 23  | 19    |
| 1097 | S | 2 | 33  | 7     |
| 1097 | S | 2 | 5   | 1     |
| 1097 | S | 2 | 37  | 1     |
| 1115 | M | 2 | 10  | 9710  |
| 1115 | M | 2 | 24  | 843   |
| 1115 | M | 2 | 20  | 439   |
| 1115 | S | 2 | 24  | 155   |
| 1115 | M | 2 | 17  | 24    |
| 1115 | S | 2 | 20  | 14    |
| 1115 | S | 2 | 10  | 11    |
| 1115 | M | 2 | 27  | 7     |
| 1115 | W | 2 | 24  | 2     |
| 1115 | S | 2 | 31  | 2     |
| 1115 | S | 2 | 17  | 1     |
| 1115 | M | 2 | 31  | 1     |
| 1133 | M | 2 | 4   | 9721  |
| 1133 | M | 2 | 18  | 802   |
| 1133 | M | 2 | 14  | 417   |
| 1133 | M | 2 | 11  | 23    |
| 1133 | M | 2 | 25  | 3     |
| 1133 | W | 2 | 4   | 1     |
| 1133 | M | 2 | 21  | 1     |
| 1160 | M | 2 | 9   | 10454 |
| 1160 | M | 2 | 5   | 417   |
| 1160 | M | 2 | 2   | 25    |
| 1160 | M | 2 | 4   | 22    |
| 1160 | M | 2 | 16  | 8     |
| 1160 | M | 2 | 12  | 1     |
| 1207 | M | 1 | 164 | 11232 |
| 1286 | W | 2 | 30  | 10071 |
| 1286 | W | 2 | 4   | 545   |
| 1286 | W | 2 | 23  | 285   |



|      |   |   |    |       |
|------|---|---|----|-------|
| 1286 | W | 2 | 14 | 145   |
| 1286 | W | 2 | 17 | 88    |
| 1286 | W | 2 | 37 | 22    |
| 1286 | W | 2 | 28 | 4     |
| 1286 | M | 2 | 30 | 1     |
| 1286 | W | 2 | 41 | 1     |
| 1289 | S | 2 | 29 | 10097 |
| 1289 | S | 2 | 3  | 549   |
| 1289 | S | 2 | 22 | 296   |
| 1289 | S | 2 | 13 | 144   |
| 1289 | S | 2 | 16 | 88    |
| 1289 | S | 2 | 36 | 22    |
| 1289 | S | 2 | 27 | 4     |
| 1289 | M | 2 | 29 | 2     |
| 1289 | S | 2 | 40 | 1     |
| 1301 | W | 2 | 25 | 680   |
| 1301 | W | 2 | 18 | 261   |
| 1301 | W | 2 | 9  | 42    |
| 1301 | W | 2 | 12 | 39    |
| 1301 | W | 2 | 32 | 8     |
| 1301 | W | 2 | 36 | 1     |
| 1316 | M | 2 | 20 | 10510 |
| 1316 | M | 2 | 4  | 167   |
| 1316 | M | 2 | 13 | 153   |
| 1316 | M | 2 | 7  | 142   |
| 1316 | M | 2 | 27 | 24    |
| 1316 | M | 2 | 18 | 4     |
| 1316 | M | 2 | 31 | 1     |
| 1343 | M | 2 | 11 | 10800 |
| 1343 | M | 2 | 4  | 232   |
| 1343 | M | 2 | 18 | 24    |
| 1343 | M | 2 | 9  | 12    |
| 1343 | S | 2 | 11 | 6     |
| 1343 | M | 2 | 22 | 1     |
| 1364 | W | 2 | 4  | 990   |
| 1364 | M | 2 | 4  | 249   |
| 1364 | W | 2 | 2  | 12    |
| 1364 | M | 2 | 11 | 5     |
| 1364 | W | 2 | 11 | 4     |
| 1364 | W | 2 | 15 | 1     |
| 1388 | W | 2 | 3  | 10497 |
| 1388 | W | 2 | 7  | 670   |
| 1388 | W | 2 | 33 | 1     |

|      |   |   |    |       |
|------|---|---|----|-------|
| 1388 | M | 2 | 3  | 1     |
| 1418 | M | 2 | 39 | 10133 |
| 1418 | M | 2 | 23 | 582   |
| 1418 | M | 2 | 4  | 219   |
| 1418 | W | 2 | 39 | 26    |
| 1418 | M | 2 | 20 | 19    |
| 1418 | M | 2 | 34 | 10    |
| 1418 | M | 2 | 31 | 4     |
| 1418 | M | 2 | 44 | 3     |
| 1418 | W | 2 | 23 | 2     |
| 1418 | M | 2 | 37 | 2     |
| 1418 | M | 2 | 36 | 1     |
| 1436 | S | 2 | 33 | 1717  |
| 1436 | S | 2 | 17 | 686   |
| 1436 | S | 2 | 14 | 9     |
| 1436 | S | 2 | 28 | 9     |
| 1436 | S | 2 | 25 | 3     |
| 1436 | S | 2 | 38 | 3     |
| 1436 | S | 2 | 31 | 1     |
| 1461 | W | 3 | 2  | 9171  |
| 1461 | W | 3 | 14 | 39    |
| 1461 | M | 3 | 2  | 1     |
| 1461 | W | 3 | 11 | 1     |
| 1466 | M | 2 | 23 | 895   |
| 1466 | M | 2 | 7  | 473   |
| 1466 | M | 2 | 18 | 7     |
| 1466 | M | 2 | 15 | 3     |
| 1466 | M | 2 | 28 | 3     |
| 1466 | M | 2 | 4  | 3     |
| 1466 | M | 2 | 21 | 1     |
| 1469 | M | 2 | 6  | 913   |
| 1469 | M | 2 | 22 | 31    |
| 1469 | M | 2 | 3  | 3     |
| 1473 | W | 3 | 10 | 1016  |
| 1473 | W | 3 | 5  | 10    |
| 1473 | W | 3 | 22 | 7     |
| 1473 | W | 3 | 13 | 6     |
| 1473 | W | 3 | 3  | 3     |
| 1473 | W | 3 | 65 | 2     |
| 1473 | W | 3 | 7  | 1     |
| 1473 | W | 3 | 19 | 1     |
| 1477 | M | 1 | 74 | 11206 |
| 1477 | W | 1 | 74 | 5     |

|      |   |   |    |       |
|------|---|---|----|-------|
| 1477 | S | 1 | 74 | 1     |
| 1493 | S | 2 | 14 | 10731 |
| 1493 | M | 2 | 14 | 24    |
| 1493 | S | 2 | 9  | 11    |
| 1493 | S | 2 | 19 | 6     |
| 1493 | S | 2 | 6  | 4     |
| 1493 | S | 2 | 12 | 2     |
| 1493 | S | 2 | 11 | 1     |
| 1502 | W | 2 | 11 | 10912 |
| 1502 | W | 2 | 6  | 12    |
| 1502 | W | 2 | 16 | 5     |
| 1502 | M | 2 | 11 | 4     |
| 1502 | W | 2 | 3  | 4     |
| 1502 | W | 2 | 9  | 2     |
| 1502 | W | 2 | 8  | 1     |
| 1553 | M | 2 | 2  | 10643 |
| 1553 | M | 2 | 4  | 18    |
| 1553 | M | 2 | 26 | 7     |
| 1553 | M | 2 | 13 | 1     |
| 1573 | M | 1 | 42 | 928   |
| 1573 | W | 1 | 42 | 10    |
| 1573 | S | 1 | 42 | 2     |
| 1660 | W | 1 | 13 | 11236 |
| 1660 | M | 1 | 13 | 1     |

**Table S12. Length and count data for influenza A putative ORFs accompanying Figure S10 (H2).**

| <b>Position</b> | <b>Kozak</b> | <b>Frame</b> | <b>Length</b> | <b>Count</b> |
|-----------------|--------------|--------------|---------------|--------------|
| 1               | W            | 1            | 562           | 468          |
| 54              | M            | 3            | 13            | 180          |
| 54              | M            | 3            | 30            | 169          |
| 54              | M            | 3            | 7             | 97           |
| 54              | M            | 3            | 6             | 11           |
| 54              | M            | 3            | 26            | 4            |
| 54              | M            | 3            | 10            | 3            |
| 54              | M            | 3            | 47            | 2            |
| 68              | M            | 2            | 18            | 224          |
| 68              | M            | 2            | 12            | 91           |
| 113             | M            | 2            | 3             | 167          |
| 128             | W            | 2            | 16            | 315          |
| 158             | S            | 2            | 6             | 367          |
| 168             | M            | 3            | 9             | 231          |
| 168             | M            | 3            | 26            | 30           |
| 179             | M            | 2            | 26            | 82           |
| 179             | M            | 2            | 7             | 46           |
| 179             | M            | 2            | 12            | 1            |
| 222             | M            | 3            | 8             | 212          |
| 222             | S            | 3            | 8             | 20           |
| 270             | M            | 3            | 21            | 225          |
| 270             | S            | 3            | 21            | 218          |
| 270             | M            | 3            | 23            | 5            |
| 270             | S            | 3            | 18            | 4            |
| 270             | S            | 3            | 23            | 4            |
| 270             | S            | 3            | 11            | 4            |
| 270             | S            | 3            | 12            | 1            |
| 270             | M            | 3            | 20            | 1            |
| 270             | M            | 3            | 11            | 1            |
| 283             | S            | 1            | 468           | 208          |
| 305             | M            | 2            | 14            | 220          |
| 305             | S            | 2            | 14            | 129          |
| 305             | M            | 2            | 21            | 1            |
| 312             | W            | 3            | 7             | 61           |
| 312             | W            | 3            | 6             | 1            |
| 332             | W            | 2            | 5             | 451          |
| 332             | M            | 2            | 5             | 5            |
| 332             | W            | 2            | 12            | 1            |
| 338             | M            | 2            | 3             | 463          |

|     |   |   |     |     |
|-----|---|---|-----|-----|
| 338 | M | 2 | 10  | 1   |
| 338 | W | 2 | 3   | 1   |
| 404 | M | 2 | 29  | 23  |
| 404 | S | 2 | 29  | 18  |
| 408 | M | 3 | 38  | 132 |
| 408 | M | 3 | 60  | 100 |
| 408 | M | 3 | 17  | 93  |
| 408 | M | 3 | 22  | 17  |
| 408 | M | 3 | 4   | 8   |
| 408 | M | 3 | 42  | 4   |
| 408 | M | 3 | 16  | 4   |
| 408 | M | 3 | 43  | 2   |
| 408 | S | 3 | 60  | 2   |
| 455 | M | 2 | 12  | 30  |
| 455 | M | 2 | 35  | 27  |
| 455 | S | 2 | 12  | 1   |
| 481 | S | 1 | 402 | 463 |
| 481 | M | 1 | 402 | 4   |
| 556 | W | 1 | 377 | 445 |
| 587 | W | 2 | 23  | 223 |
| 587 | W | 2 | 18  | 198 |
| 587 | W | 2 | 12  | 6   |
| 587 | W | 2 | 31  | 5   |
| 590 | M | 2 | 17  | 188 |
| 590 | M | 2 | 22  | 48  |
| 590 | M | 2 | 11  | 14  |
| 590 | M | 2 | 30  | 5   |
| 590 | W | 2 | 17  | 5   |
| 590 | W | 2 | 5   | 3   |
| 590 | W | 2 | 22  | 3   |
| 590 | M | 2 | 5   | 1   |
| 593 | M | 2 | 21  | 156 |
| 593 | M | 2 | 10  | 17  |
| 593 | M | 2 | 16  | 11  |
| 596 | M | 2 | 15  | 23  |
| 620 | M | 2 | 7   | 194 |
| 620 | M | 2 | 12  | 155 |
| 620 | M | 2 | 20  | 1   |
| 632 | W | 2 | 8   | 234 |
| 632 | W | 2 | 3   | 220 |
| 632 | W | 2 | 16  | 5   |
| 701 | M | 2 | 19  | 195 |
| 701 | M | 2 | 13  | 134 |

|      |   |   |     |     |
|------|---|---|-----|-----|
| 701  | M | 2 | 2   | 56  |
| 701  | M | 2 | 27  | 1   |
| 718  | S | 1 | 323 | 468 |
| 729  | M | 3 | 16  | 31  |
| 729  | M | 3 | 12  | 14  |
| 743  | W | 2 | 5   | 33  |
| 745  | M | 1 | 314 | 143 |
| 747  | S | 3 | 6   | 176 |
| 747  | M | 3 | 6   | 64  |
| 747  | M | 3 | 10  | 27  |
| 747  | S | 3 | 10  | 5   |
| 747  | M | 3 | 25  | 4   |
| 752  | M | 2 | 2   | 205 |
| 752  | M | 2 | 10  | 28  |
| 797  | S | 2 | 13  | 362 |
| 797  | S | 2 | 12  | 4   |
| 797  | S | 2 | 4   | 1   |
| 797  | S | 2 | 30  | 1   |
| 835  | M | 1 | 284 | 458 |
| 835  | W | 1 | 284 | 1   |
| 873  | W | 3 | 23  | 320 |
| 873  | W | 3 | 15  | 110 |
| 873  | W | 3 | 32  | 4   |
| 873  | M | 3 | 23  | 3   |
| 873  | W | 3 | 46  | 1   |
| 920  | M | 2 | 4   | 104 |
| 920  | M | 2 | 6   | 1   |
| 945  | W | 3 | 22  | 50  |
| 945  | W | 3 | 8   | 45  |
| 945  | W | 3 | 2   | 3   |
| 956  | M | 2 | 12  | 45  |
| 956  | M | 2 | 6   | 12  |
| 956  | M | 2 | 27  | 2   |
| 956  | M | 2 | 8   | 1   |
| 998  | M | 2 | 13  | 377 |
| 998  | M | 2 | 17  | 1   |
| 1059 | M | 3 | 5   | 242 |
| 1059 | S | 3 | 5   | 220 |
| 1069 | S | 1 | 206 | 389 |
| 1069 | M | 1 | 206 | 79  |
| 1076 | M | 2 | 33  | 230 |
| 1076 | M | 2 | 29  | 227 |
| 1076 | M | 2 | 36  | 4   |

|      |   |   |     |     |
|------|---|---|-----|-----|
| 1076 | M | 2 | 28  | 3   |
| 1085 | S | 2 | 30  | 228 |
| 1085 | S | 2 | 26  | 224 |
| 1085 | S | 2 | 33  | 4   |
| 1085 | S | 2 | 25  | 2   |
| 1103 | M | 2 | 20  | 227 |
| 1103 | M | 2 | 24  | 215 |
| 1103 | M | 2 | 27  | 4   |
| 1103 | M | 2 | 19  | 3   |
| 1121 | M | 2 | 18  | 234 |
| 1121 | M | 2 | 14  | 213 |
| 1121 | M | 2 | 21  | 4   |
| 1121 | M | 2 | 13  | 3   |
| 1157 | M | 2 | 6   | 208 |
| 1157 | M | 2 | 2   | 148 |
| 1157 | M | 2 | 9   | 4   |
| 1157 | W | 2 | 6   | 2   |
| 1195 | M | 1 | 164 | 461 |
| 1270 | S | 1 | 139 | 463 |
| 1277 | S | 2 | 13  | 199 |
| 1277 | S | 2 | 3   | 49  |
| 1277 | S | 2 | 15  | 5   |
| 1289 | W | 2 | 9   | 393 |
| 1289 | W | 2 | 11  | 69  |
| 1293 | M | 3 | 3   | 126 |
| 1293 | M | 3 | 13  | 90  |
| 1293 | M | 3 | 17  | 5   |
| 1293 | M | 3 | 5   | 4   |
| 1304 | M | 2 | 4   | 394 |
| 1304 | M | 2 | 6   | 71  |
| 1324 | M | 1 | 121 | 468 |
| 1331 | M | 2 | 11  | 248 |
| 1331 | M | 2 | 22  | 208 |
| 1331 | M | 2 | 2   | 3   |
| 1352 | W | 2 | 4   | 227 |
| 1352 | W | 2 | 15  | 208 |
| 1352 | M | 2 | 4   | 27  |
| 1361 | W | 2 | 12  | 210 |
| 1376 | W | 2 | 7   | 253 |
| 1390 | M | 1 | 99  | 466 |
| 1406 | M | 2 | 4   | 374 |
| 1406 | M | 2 | 20  | 12  |
| 1424 | S | 2 | 14  | 238 |

|      |   |   |    |     |
|------|---|---|----|-----|
| 1424 | S | 2 | 17 | 11  |
| 1424 | S | 2 | 33 | 1   |
| 1428 | W | 3 | 2  | 387 |
| 1428 | W | 3 | 6  | 9   |
| 1454 | M | 2 | 4  | 417 |
| 1454 | M | 2 | 23 | 12  |
| 1457 | M | 2 | 3  | 442 |
| 1457 | M | 2 | 22 | 12  |
| 1457 | M | 2 | 6  | 11  |
| 1461 | W | 3 | 3  | 282 |
| 1461 | W | 3 | 10 | 168 |
| 1461 | W | 3 | 5  | 2   |
| 1465 | W | 1 | 74 | 444 |
| 1465 | M | 1 | 74 | 23  |
| 1481 | S | 2 | 14 | 379 |
| 1481 | S | 2 | 22 | 1   |
| 1490 | W | 2 | 11 | 452 |
| 1490 | W | 2 | 19 | 1   |
| 1505 | M | 2 | 6  | 467 |
| 1505 | M | 2 | 14 | 1   |
| 1532 | M | 2 | 5  | 206 |
| 1532 | M | 2 | 7  | 14  |
| 1561 | S | 1 | 42 | 468 |
| 1589 | W | 2 | 3  | 178 |
| 1589 | W | 2 | 12 | 50  |
| 1624 | M | 1 | 21 | 459 |
| 1624 | S | 1 | 21 | 7   |
| 1627 | S | 1 | 20 | 96  |
| 1644 | M | 3 | 4  | 80  |
| 1648 | W | 1 | 13 | 468 |



**Table S13. Length and count data for influenza A putative ORFs accompanying Figure S11 (H3).**

| <b>Position</b> | <b>Kozak</b> | <b>Frame</b> | <b>Length</b> | <b>Count</b> |
|-----------------|--------------|--------------|---------------|--------------|
| 1               | W            | 1            | 566           | 8025         |
| 33              | W            | 3            | 11            | 6137         |
| 33              | W            | 3            | 9             | 107          |
| 33              | W            | 3            | 36            | 19           |
| 33              | W            | 3            | 5             | 14           |
| 33              | M            | 3            | 11            | 7            |
| 33              | W            | 3            | 10            | 3            |
| 33              | W            | 3            | 13            | 3            |
| 65              | M            | 2            | 19            | 5912         |
| 65              | W            | 2            | 19            | 143          |
| 65              | M            | 2            | 20            | 46           |
| 65              | M            | 2            | 9             | 34           |
| 65              | S            | 2            | 9             | 13           |
| 65              | S            | 2            | 19            | 9            |
| 65              | M            | 2            | 4             | 6            |
| 65              | S            | 2            | 20            | 5            |
| 65              | M            | 2            | 15            | 2            |
| 65              | M            | 2            | 30            | 2            |
| 65              | M            | 2            | 14            | 1            |
| 65              | M            | 2            | 13            | 1            |
| 76              | S            | 1            | 541           | 718          |
| 76              | M            | 1            | 541           | 14           |
| 101             | M            | 2            | 7             | 7840         |
| 101             | M            | 2            | 8             | 77           |
| 101             | M            | 2            | 2             | 4            |
| 101             | M            | 2            | 3             | 2            |
| 101             | M            | 2            | 18            | 2            |
| 113             | M            | 2            | 3             | 619          |
| 113             | S            | 2            | 3             | 30           |
| 113             | M            | 2            | 4             | 10           |
| 113             | S            | 2            | 4             | 5            |
| 140             | W            | 2            | 35            | 3769         |
| 140             | W            | 2            | 5             | 3468         |
| 140             | W            | 2            | 17            | 506          |
| 140             | W            | 2            | 31            | 82           |
| 140             | W            | 2            | 3             | 24           |
| 140             | W            | 2            | 11            | 17           |
| 140             | W            | 2            | 26            | 3            |
| 140             | W            | 2            | 19            | 2            |

|     |   |   |    |      |
|-----|---|---|----|------|
| 140 | M | 2 | 17 | 1    |
| 161 | W | 2 | 28 | 6573 |
| 161 | W | 2 | 4  | 629  |
| 161 | W | 2 | 10 | 520  |
| 161 | W | 2 | 24 | 173  |
| 161 | W | 2 | 29 | 16   |
| 161 | W | 2 | 73 | 16   |
| 161 | W | 2 | 19 | 5    |
| 161 | W | 2 | 12 | 4    |
| 161 | W | 2 | 21 | 3    |
| 201 | M | 3 | 8  | 6636 |
| 201 | M | 3 | 5  | 737  |
| 201 | M | 3 | 25 | 384  |
| 201 | M | 3 | 2  | 39   |
| 201 | M | 3 | 30 | 4    |
| 201 | W | 3 | 8  | 2    |
| 201 | M | 3 | 16 | 1    |
| 201 | M | 3 | 4  | 1    |
| 201 | M | 3 | 13 | 1    |
| 227 | M | 2 | 6  | 7712 |
| 227 | M | 2 | 2  | 230  |
| 227 | M | 2 | 7  | 34   |
| 227 | M | 2 | 51 | 12   |
| 227 | W | 2 | 6  | 1    |
| 251 | W | 2 | 43 | 7075 |
| 251 | W | 2 | 3  | 467  |
| 251 | W | 2 | 20 | 123  |
| 251 | W | 2 | 72 | 11   |
| 251 | W | 2 | 2  | 8    |
| 251 | W | 2 | 40 | 6    |
| 251 | W | 2 | 83 | 5    |
| 251 | W | 2 | 34 | 2    |
| 251 | W | 2 | 50 | 2    |
| 251 | W | 2 | 62 | 1    |
| 278 | S | 2 | 34 | 5857 |
| 278 | M | 2 | 34 | 1430 |
| 278 | M | 2 | 11 | 581  |
| 278 | S | 2 | 63 | 11   |
| 278 | S | 2 | 31 | 5    |
| 278 | M | 2 | 74 | 3    |
| 278 | M | 2 | 5  | 3    |
| 278 | S | 2 | 11 | 2    |
| 278 | S | 2 | 74 | 2    |

|     |   |   |    |      |
|-----|---|---|----|------|
| 278 | M | 2 | 41 | 2    |
| 278 | M | 2 | 53 | 1    |
| 278 | S | 2 | 25 | 1    |
| 278 | M | 2 | 25 | 1    |
| 278 | M | 2 | 31 | 1    |
| 290 | M | 2 | 30 | 935  |
| 290 | M | 2 | 7  | 585  |
| 290 | W | 2 | 30 | 47   |
| 290 | M | 2 | 49 | 3    |
| 290 | S | 2 | 30 | 3    |
| 290 | M | 2 | 37 | 2    |
| 290 | M | 2 | 27 | 1    |
| 290 | S | 2 | 7  | 1    |
| 297 | S | 3 | 5  | 6282 |
| 297 | S | 3 | 17 | 412  |
| 297 | S | 3 | 39 | 97   |
| 297 | S | 3 | 11 | 43   |
| 297 | S | 3 | 8  | 10   |
| 297 | M | 3 | 17 | 9    |
| 297 | S | 3 | 25 | 4    |
| 297 | S | 3 | 61 | 1    |
| 297 | M | 3 | 5  | 1    |
| 297 | S | 3 | 12 | 1    |
| 297 | S | 3 | 7  | 1    |
| 308 | W | 2 | 24 | 525  |
| 308 | W | 2 | 21 | 1    |
| 308 | W | 2 | 43 | 1    |
| 323 | M | 2 | 19 | 588  |
| 323 | M | 2 | 26 | 3    |
| 323 | M | 2 | 38 | 3    |
| 323 | M | 2 | 16 | 1    |
| 347 | W | 2 | 11 | 6893 |
| 347 | W | 2 | 30 | 12   |
| 347 | W | 2 | 40 | 11   |
| 347 | W | 2 | 8  | 7    |
| 347 | W | 2 | 18 | 4    |
| 347 | W | 2 | 51 | 2    |
| 347 | W | 2 | 2  | 1    |
| 350 | M | 2 | 10 | 7417 |
| 350 | M | 2 | 29 | 12   |
| 350 | M | 2 | 39 | 11   |
| 350 | M | 2 | 7  | 7    |
| 350 | M | 2 | 50 | 5    |

|     |   |   |     |      |
|-----|---|---|-----|------|
| 350 | W | 2 | 10  | 2    |
| 350 | M | 2 | 17  | 2    |
| 362 | M | 2 | 6   | 7843 |
| 362 | M | 2 | 25  | 11   |
| 362 | M | 2 | 35  | 11   |
| 362 | M | 2 | 3   | 7    |
| 362 | M | 2 | 46  | 5    |
| 362 | M | 2 | 13  | 3    |
| 362 | W | 2 | 6   | 1    |
| 413 | M | 2 | 18  | 2996 |
| 413 | M | 2 | 29  | 2194 |
| 413 | W | 2 | 29  | 585  |
| 413 | W | 2 | 8   | 19   |
| 413 | M | 2 | 8   | 6    |
| 413 | M | 2 | 22  | 2    |
| 413 | W | 2 | 18  | 1    |
| 426 | M | 3 | 18  | 573  |
| 426 | M | 3 | 29  | 68   |
| 426 | M | 3 | 10  | 44   |
| 426 | M | 3 | 13  | 37   |
| 426 | M | 3 | 23  | 5    |
| 426 | M | 3 | 17  | 1    |
| 426 | M | 3 | 45  | 1    |
| 446 | S | 2 | 18  | 4320 |
| 446 | S | 2 | 7   | 66   |
| 446 | S | 2 | 11  | 2    |
| 446 | M | 2 | 18  | 1    |
| 446 | S | 2 | 21  | 1    |
| 458 | M | 2 | 14  | 1955 |
| 458 | M | 2 | 3   | 27   |
| 458 | M | 2 | 7   | 1    |
| 482 | M | 2 | 6   | 458  |
| 482 | S | 2 | 6   | 2    |
| 482 | M | 2 | 9   | 1    |
| 550 | M | 1 | 383 | 7972 |
| 550 | W | 1 | 383 | 2    |
| 560 | M | 2 | 42  | 6105 |
| 560 | M | 2 | 31  | 624  |
| 560 | S | 2 | 42  | 364  |
| 560 | M | 2 | 32  | 350  |
| 560 | M | 2 | 52  | 292  |
| 560 | M | 2 | 30  | 34   |
| 560 | M | 2 | 28  | 12   |

|     |   |   |     |      |
|-----|---|---|-----|------|
| 560 | M | 2 | 37  | 10   |
| 560 | M | 2 | 3   | 2    |
| 560 | M | 2 | 59  | 2    |
| 560 | S | 2 | 32  | 2    |
| 560 | S | 2 | 37  | 2    |
| 560 | M | 2 | 26  | 2    |
| 560 | S | 2 | 28  | 1    |
| 560 | S | 2 | 31  | 1    |
| 581 | W | 2 | 24  | 605  |
| 581 | W | 2 | 35  | 62   |
| 614 | M | 2 | 24  | 1683 |
| 614 | M | 2 | 19  | 8    |
| 614 | M | 2 | 12  | 7    |
| 614 | M | 2 | 14  | 5    |
| 614 | M | 2 | 34  | 2    |
| 614 | M | 2 | 10  | 1    |
| 632 | W | 2 | 18  | 6386 |
| 632 | W | 2 | 7   | 443  |
| 632 | W | 2 | 8   | 350  |
| 632 | W | 2 | 28  | 298  |
| 632 | W | 2 | 6   | 27   |
| 632 | W | 2 | 4   | 12   |
| 632 | W | 2 | 13  | 12   |
| 632 | W | 2 | 27  | 5    |
| 632 | W | 2 | 2   | 2    |
| 632 | W | 2 | 35  | 2    |
| 632 | M | 2 | 4   | 1    |
| 632 | W | 2 | 16  | 1    |
| 722 | M | 2 | 5   | 589  |
| 770 | M | 2 | 2   | 505  |
| 770 | M | 2 | 3   | 202  |
| 791 | S | 2 | 3   | 1516 |
| 791 | M | 2 | 3   | 1    |
| 826 | M | 1 | 291 | 1515 |
| 826 | W | 1 | 291 | 1    |
| 850 | M | 1 | 283 | 7985 |
| 850 | S | 1 | 283 | 3    |
| 850 | W | 1 | 283 | 1    |
| 860 | W | 2 | 26  | 7835 |
| 860 | W | 2 | 11  | 34   |
| 860 | W | 2 | 43  | 20   |
| 860 | W | 2 | 3   | 16   |
| 860 | W | 2 | 2   | 13   |

|     |   |   |    |      |
|-----|---|---|----|------|
| 860 | W | 2 | 8  | 3    |
| 860 | W | 2 | 17 | 2    |
| 860 | M | 2 | 26 | 1    |
| 876 | W | 3 | 3  | 5730 |
| 876 | W | 3 | 14 | 612  |
| 876 | W | 3 | 8  | 60   |
| 876 | M | 3 | 3  | 52   |
| 876 | W | 3 | 10 | 2    |
| 876 | W | 3 | 13 | 1    |
| 888 | W | 3 | 10 | 6816 |
| 888 | W | 3 | 4  | 101  |
| 888 | W | 3 | 29 | 98   |
| 888 | W | 3 | 9  | 24   |
| 888 | M | 3 | 4  | 9    |
| 888 | M | 3 | 10 | 8    |
| 888 | M | 3 | 9  | 7    |
| 888 | W | 3 | 6  | 4    |
| 888 | W | 3 | 18 | 1    |
| 902 | M | 2 | 12 | 7829 |
| 902 | M | 2 | 29 | 22   |
| 902 | S | 2 | 12 | 7    |
| 902 | M | 2 | 3  | 2    |
| 917 | W | 2 | 7  | 7839 |
| 917 | M | 2 | 7  | 24   |
| 917 | W | 2 | 24 | 23   |
| 953 | M | 2 | 12 | 4173 |
| 953 | M | 2 | 7  | 38   |
| 953 | M | 2 | 37 | 4    |
| 953 | M | 2 | 33 | 2    |
| 960 | M | 3 | 20 | 577  |
| 960 | M | 3 | 2  | 568  |
| 960 | M | 3 | 5  | 534  |
| 960 | M | 3 | 24 | 29   |
| 960 | M | 3 | 63 | 24   |
| 960 | M | 3 | 70 | 10   |
| 960 | M | 3 | 54 | 4    |
| 960 | M | 3 | 17 | 3    |
| 960 | W | 3 | 2  | 2    |
| 960 | W | 3 | 5  | 1    |
| 971 | M | 2 | 6  | 7718 |
| 971 | M | 2 | 31 | 4    |
| 971 | W | 2 | 6  | 2    |
| 971 | M | 2 | 27 | 1    |

|      |   |   |     |      |
|------|---|---|-----|------|
| 1006 | M | 1 | 231 | 8022 |
| 1006 | W | 1 | 231 | 1    |
| 1013 | M | 2 | 17  | 4530 |
| 1013 | M | 2 | 13  | 2673 |
| 1013 | M | 2 | 59  | 4    |
| 1013 | M | 2 | 24  | 2    |
| 1013 | M | 2 | 3   | 1    |
| 1013 | W | 2 | 13  | 1    |
| 1013 | S | 2 | 13  | 1    |
| 1070 | S | 2 | 40  | 3937 |
| 1070 | S | 2 | 5   | 1665 |
| 1070 | S | 2 | 6   | 1132 |
| 1070 | S | 2 | 20  | 1017 |
| 1070 | S | 2 | 33  | 18   |
| 1070 | S | 2 | 23  | 10   |
| 1070 | S | 2 | 15  | 8    |
| 1070 | S | 2 | 36  | 4    |
| 1070 | S | 2 | 43  | 3    |
| 1070 | S | 2 | 26  | 3    |
| 1070 | S | 2 | 27  | 1    |
| 1070 | S | 2 | 32  | 1    |
| 1074 | M | 3 | 25  | 530  |
| 1074 | M | 3 | 16  | 454  |
| 1074 | M | 3 | 32  | 15   |
| 1074 | M | 3 | 23  | 10   |
| 1074 | M | 3 | 11  | 7    |
| 1074 | M | 3 | 13  | 1    |
| 1074 | M | 3 | 47  | 1    |
| 1084 | S | 1 | 205 | 6142 |
| 1084 | M | 1 | 205 | 1883 |
| 1087 | S | 1 | 204 | 478  |
| 1091 | M | 2 | 33  | 3237 |
| 1091 | M | 2 | 13  | 1024 |
| 1091 | M | 2 | 26  | 18   |
| 1091 | M | 2 | 19  | 10   |
| 1091 | M | 2 | 29  | 3    |
| 1091 | M | 2 | 8   | 2    |
| 1091 | M | 2 | 36  | 2    |
| 1091 | M | 2 | 25  | 1    |
| 1100 | S | 2 | 30  | 717  |
| 1100 | S | 2 | 16  | 688  |
| 1100 | S | 2 | 26  | 6    |
| 1100 | S | 2 | 10  | 6    |

|      |   |   |     |      |
|------|---|---|-----|------|
| 1100 | S | 2 | 33  | 5    |
| 1100 | S | 2 | 23  | 1    |
| 1181 | M | 2 | 3   | 5912 |
| 1181 | M | 2 | 6   | 8    |
| 1181 | W | 2 | 3   | 6    |
| 1214 | W | 2 | 13  | 923  |
| 1214 | W | 2 | 29  | 395  |
| 1214 | W | 2 | 24  | 27   |
| 1214 | W | 2 | 20  | 3    |
| 1214 | W | 2 | 11  | 1    |
| 1214 | W | 2 | 50  | 1    |
| 1214 | W | 2 | 6   | 1    |
| 1283 | M | 2 | 6   | 6639 |
| 1283 | M | 2 | 27  | 7    |
| 1308 | M | 3 | 17  | 849  |
| 1308 | M | 3 | 20  | 168  |
| 1308 | M | 3 | 3   | 13   |
| 1308 | M | 3 | 5   | 3    |
| 1308 | M | 3 | 2   | 1    |
| 1319 | M | 2 | 15  | 1518 |
| 1319 | M | 2 | 7   | 247  |
| 1319 | M | 2 | 5   | 106  |
| 1319 | M | 2 | 20  | 8    |
| 1319 | M | 2 | 4   | 8    |
| 1319 | M | 2 | 12  | 2    |
| 1378 | M | 1 | 107 | 8007 |
| 1378 | S | 1 | 107 | 10   |
| 1378 | W | 1 | 107 | 7    |
| 1421 | M | 2 | 20  | 7901 |
| 1421 | M | 2 | 38  | 72   |
| 1421 | M | 2 | 4   | 19   |
| 1421 | M | 2 | 9   | 13   |
| 1421 | M | 2 | 24  | 3    |
| 1421 | M | 2 | 10  | 2    |
| 1421 | S | 2 | 20  | 1    |
| 1421 | M | 2 | 3   | 1    |
| 1421 | M | 2 | 49  | 1    |
| 1432 | S | 1 | 89  | 7978 |
| 1432 | M | 1 | 89  | 2    |
| 1439 | S | 2 | 14  | 7435 |
| 1439 | S | 2 | 32  | 74   |
| 1439 | S | 2 | 3   | 14   |
| 1439 | S | 2 | 18  | 3    |



|      |   |   |    |      |
|------|---|---|----|------|
| 1439 | S | 2 | 43 | 1    |
| 1439 | M | 2 | 14 | 1    |
| 1439 | S | 2 | 4  | 1    |
| 1439 | M | 2 | 4  | 1    |
| 1472 | M | 2 | 3  | 7167 |
| 1472 | M | 2 | 21 | 39   |
| 1472 | M | 2 | 7  | 3    |
| 1472 | W | 2 | 21 | 1    |
| 1472 | M | 2 | 32 | 1    |
| 1476 | W | 3 | 10 | 698  |
| 1476 | W | 3 | 12 | 6    |
| 1476 | W | 3 | 5  | 6    |
| 1496 | S | 2 | 13 | 7108 |
| 1496 | M | 2 | 13 | 43   |
| 1496 | S | 2 | 24 | 2    |
| 1505 | W | 2 | 10 | 7453 |
| 1505 | M | 2 | 10 | 6    |
| 1505 | W | 2 | 21 | 3    |
| 1511 | M | 2 | 8  | 4866 |
| 1511 | S | 2 | 8  | 5    |
| 1511 | M | 2 | 19 | 3    |
| 1514 | M | 2 | 7  | 6307 |
| 1514 | W | 2 | 7  | 4    |
| 1526 | M | 2 | 3  | 5525 |
| 1526 | M | 2 | 14 | 1    |
| 1596 | M | 3 | 28 | 7438 |
| 1596 | S | 3 | 28 | 2    |
| 1596 | M | 3 | 26 | 1    |
| 1617 | M | 3 | 21 | 7927 |
| 1617 | W | 3 | 21 | 24   |
| 1617 | M | 3 | 19 | 2    |
| 1654 | M | 1 | 15 | 7978 |

**Table S14. Length and count data for influenza A putative ORFs accompanying Figure S12 (H4).**

| <b>Position</b> | <b>Kozak</b> | <b>Frame</b> | <b>Length</b> | <b>Count</b> |
|-----------------|--------------|--------------|---------------|--------------|
| 1               | W            | 1            | 564           | 909          |
| 75              | M            | 3            | 8             | 423          |
| 75              | M            | 3            | 17            | 242          |
| 75              | M            | 3            | 18            | 215          |
| 75              | M            | 3            | 19            | 3            |
| 75              | W            | 3            | 17            | 2            |
| 75              | M            | 3            | 43            | 1            |
| 79              | M            | 1            | 538           | 151          |
| 89              | M            | 2            | 8             | 886          |
| 89              | M            | 2            | 2             | 12           |
| 89              | M            | 2            | 7             | 4            |
| 101             | M            | 2            | 4             | 864          |
| 101             | M            | 2            | 3             | 5            |
| 109             | S            | 1            | 528           | 902          |
| 128             | W            | 2            | 3             | 823          |
| 128             | W            | 2            | 25            | 33           |
| 128             | W            | 2            | 12            | 23           |
| 128             | W            | 2            | 11            | 5            |
| 128             | W            | 2            | 5             | 2            |
| 189             | M            | 3            | 8             | 61           |
| 189             | M            | 3            | 13            | 47           |
| 189             | M            | 3            | 2             | 11           |
| 189             | M            | 3            | 49            | 1            |
| 189             | M            | 3            | 5             | 1            |
| 215             | M            | 2            | 19            | 602          |
| 215             | M            | 2            | 11            | 44           |
| 215             | M            | 2            | 7             | 5            |
| 215             | M            | 2            | 6             | 3            |
| 215             | M            | 2            | 28            | 1            |
| 215             | W            | 2            | 19            | 1            |
| 239             | M            | 2            | 11            | 812          |
| 239             | M            | 2            | 3             | 54           |
| 239             | M            | 2            | 20            | 10           |
| 239             | S            | 2            | 11            | 1            |
| 239             | W            | 2            | 11            | 1            |
| 275             | M            | 2            | 8             | 879          |
| 275             | W            | 2            | 8             | 13           |
| 275             | M            | 2            | 28            | 1            |
| 285             | S            | 3            | 17            | 620          |

|     |   |   |     |     |
|-----|---|---|-----|-----|
| 285 | M | 3 | 17  | 41  |
| 285 | S | 3 | 62  | 32  |
| 285 | S | 3 | 35  | 15  |
| 285 | M | 3 | 39  | 5   |
| 285 | M | 3 | 11  | 4   |
| 285 | S | 3 | 31  | 2   |
| 285 | S | 3 | 30  | 2   |
| 285 | S | 3 | 20  | 1   |
| 285 | S | 3 | 25  | 1   |
| 285 | S | 3 | 8   | 1   |
| 290 | M | 2 | 3   | 790 |
| 311 | W | 2 | 16  | 85  |
| 311 | W | 2 | 20  | 21  |
| 311 | W | 2 | 2   | 19  |
| 316 | S | 1 | 459 | 45  |
| 338 | W | 2 | 11  | 744 |
| 338 | W | 2 | 7   | 132 |
| 338 | W | 2 | 43  | 21  |
| 338 | W | 2 | 29  | 1   |
| 338 | M | 2 | 11  | 1   |
| 338 | W | 2 | 50  | 1   |
| 380 | S | 2 | 29  | 698 |
| 380 | S | 2 | 15  | 136 |
| 380 | S | 2 | 6   | 10  |
| 380 | S | 2 | 36  | 7   |
| 380 | M | 2 | 29  | 1   |
| 414 | M | 3 | 13  | 439 |
| 414 | M | 3 | 19  | 370 |
| 414 | M | 3 | 8   | 29  |
| 414 | M | 3 | 4   | 12  |
| 414 | M | 3 | 22  | 11  |
| 414 | M | 3 | 31  | 3   |
| 414 | M | 3 | 17  | 2   |
| 414 | M | 3 | 10  | 1   |
| 414 | M | 3 | 18  | 1   |
| 434 | S | 2 | 11  | 881 |
| 434 | S | 2 | 18  | 10  |
| 450 | M | 3 | 7   | 329 |
| 450 | M | 3 | 19  | 3   |
| 450 | M | 3 | 5   | 2   |
| 450 | M | 3 | 6   | 1   |
| 470 | W | 2 | 6   | 858 |
| 470 | M | 2 | 6   | 4   |

|      |   |   |     |     |
|------|---|---|-----|-----|
| 470  | W | 2 | 9   | 4   |
| 509  | M | 2 | 9   | 693 |
| 509  | W | 2 | 9   | 1   |
| 515  | M | 2 | 7   | 900 |
| 551  | S | 2 | 31  | 627 |
| 551  | S | 2 | 52  | 25  |
| 551  | S | 2 | 42  | 23  |
| 551  | S | 2 | 18  | 1   |
| 551  | S | 2 | 25  | 1   |
| 560  | M | 2 | 28  | 527 |
| 560  | M | 2 | 39  | 110 |
| 560  | M | 2 | 49  | 27  |
| 560  | M | 2 | 15  | 1   |
| 560  | M | 2 | 22  | 1   |
| 576  | M | 3 | 8   | 618 |
| 576  | M | 3 | 16  | 154 |
| 576  | M | 3 | 13  | 5   |
| 576  | M | 3 | 18  | 1   |
| 576  | M | 3 | 40  | 1   |
| 702  | S | 3 | 7   | 508 |
| 702  | S | 3 | 58  | 141 |
| 702  | S | 3 | 37  | 56  |
| 702  | S | 3 | 9   | 40  |
| 702  | S | 3 | 40  | 5   |
| 702  | S | 3 | 24  | 1   |
| 870  | W | 3 | 3   | 43  |
| 870  | W | 3 | 2   | 32  |
| 870  | W | 3 | 15  | 31  |
| 870  | W | 3 | 8   | 11  |
| 870  | M | 3 | 15  | 7   |
| 870  | M | 3 | 2   | 2   |
| 870  | W | 3 | 48  | 2   |
| 870  | W | 3 | 33  | 2   |
| 882  | W | 3 | 11  | 261 |
| 882  | W | 3 | 3   | 155 |
| 882  | W | 3 | 44  | 42  |
| 882  | W | 3 | 4   | 17  |
| 882  | W | 3 | 29  | 5   |
| 882  | W | 3 | 26  | 1   |
| 965  | M | 2 | 6   | 891 |
| 965  | M | 2 | 12  | 2   |
| 1000 | M | 1 | 231 | 908 |
| 1000 | S | 1 | 231 | 1   |

|      |   |   |    |     |
|------|---|---|----|-----|
| 1064 | S | 2 | 5  | 897 |
| 1064 | S | 2 | 40 | 1   |
| 1068 | M | 3 | 5  | 52  |
| 1068 | M | 3 | 25 | 9   |
| 1068 | M | 3 | 23 | 2   |
| 1085 | M | 2 | 33 | 838 |
| 1085 | M | 2 | 19 | 46  |
| 1085 | M | 2 | 29 | 10  |
| 1085 | M | 2 | 80 | 7   |
| 1085 | M | 2 | 61 | 2   |
| 1094 | S | 2 | 30 | 816 |
| 1094 | S | 2 | 16 | 27  |
| 1094 | S | 2 | 26 | 13  |
| 1094 | S | 2 | 77 | 7   |
| 1094 | S | 2 | 58 | 1   |
| 1112 | M | 2 | 24 | 820 |
| 1112 | M | 2 | 10 | 41  |
| 1112 | M | 2 | 20 | 8   |
| 1112 | M | 2 | 71 | 7   |
| 1112 | M | 2 | 52 | 2   |
| 1175 | M | 2 | 3  | 834 |
| 1175 | M | 2 | 50 | 52  |
| 1175 | M | 2 | 31 | 2   |
| 1208 | W | 2 | 13 | 699 |
| 1208 | W | 2 | 39 | 54  |
| 1208 | W | 2 | 42 | 31  |
| 1208 | W | 2 | 20 | 24  |
| 1208 | W | 2 | 48 | 23  |
| 1208 | W | 2 | 40 | 2   |
| 1277 | M | 2 | 19 | 547 |
| 1277 | M | 2 | 17 | 157 |
| 1277 | M | 2 | 16 | 137 |
| 1277 | M | 2 | 25 | 53  |
| 1277 | M | 2 | 6  | 9   |
| 1302 | M | 3 | 5  | 314 |
| 1302 | M | 3 | 3  | 122 |
| 1302 | M | 3 | 20 | 5   |
| 1302 | M | 3 | 28 | 3   |
| 1302 | M | 3 | 22 | 1   |
| 1313 | M | 2 | 7  | 554 |
| 1313 | M | 2 | 5  | 158 |
| 1313 | M | 2 | 4  | 142 |
| 1313 | M | 2 | 13 | 53  |

|      |   |   |     |     |
|------|---|---|-----|-----|
| 1372 | M | 1 | 107 | 906 |
| 1372 | S | 1 | 107 | 3   |
| 1415 | M | 2 | 23  | 771 |
| 1415 | M | 2 | 49  | 123 |
| 1415 | M | 2 | 47  | 8   |
| 1415 | M | 2 | 38  | 1   |
| 1415 | M | 2 | 70  | 1   |
| 1415 | M | 2 | 74  | 1   |
| 1433 | S | 2 | 17  | 739 |
| 1433 | S | 2 | 43  | 105 |
| 1433 | S | 2 | 41  | 8   |
| 1433 | S | 2 | 32  | 1   |
| 1433 | S | 2 | 64  | 1   |
| 1433 | S | 2 | 68  | 1   |
| 1437 | W | 3 | 2   | 602 |
| 1437 | W | 3 | 8   | 177 |
| 1490 | S | 2 | 24  | 675 |
| 1490 | S | 2 | 22  | 8   |
| 1490 | S | 2 | 13  | 3   |
| 1490 | S | 2 | 49  | 2   |
| 1490 | S | 2 | 45  | 1   |
| 1490 | S | 2 | 19  | 1   |
| 1499 | W | 2 | 21  | 868 |
| 1499 | W | 2 | 19  | 10  |
| 1499 | W | 2 | 10  | 5   |
| 1499 | W | 2 | 46  | 2   |
| 1499 | W | 2 | 16  | 1   |
| 1499 | M | 2 | 21  | 1   |
| 1499 | W | 2 | 42  | 1   |
| 1505 | M | 2 | 19  | 831 |
| 1505 | M | 2 | 17  | 7   |
| 1505 | M | 2 | 8   | 5   |
| 1505 | S | 2 | 19  | 5   |
| 1505 | M | 2 | 44  | 2   |
| 1505 | M | 2 | 14  | 1   |
| 1505 | M | 2 | 40  | 1   |
| 1508 | M | 2 | 18  | 43  |
| 1508 | M | 2 | 16  | 3   |
| 1520 | M | 2 | 14  | 185 |
| 1520 | M | 2 | 12  | 8   |
| 1520 | M | 2 | 3   | 1   |
| 1520 | M | 2 | 35  | 1   |
| 1520 | M | 2 | 39  | 1   |

1520

S

2

14

1

**Table S15. Length and count data for influenza A putative ORFs accompanying Figure S13 (H5).**

| <b>Position</b> | <b>Kozak</b> | <b>Frame</b> | <b>Length</b> | <b>Count</b> |
|-----------------|--------------|--------------|---------------|--------------|
| 1               | W            | 1            | 568           | 1501         |
| 71              | M            | 2            | 11            | 1319         |
| 71              | M            | 2            | 36            | 171          |
| 71              | W            | 2            | 11            | 2            |
| 71              | M            | 2            | 4             | 1            |
| 71              | S            | 2            | 11            | 1            |
| 71              | M            | 2            | 12            | 1            |
| 106             | S            | 1            | 533           | 1497         |
| 106             | M            | 1            | 533           | 1            |
| 131             | W            | 2            | 16            | 762          |
| 131             | W            | 2            | 5             | 53           |
| 131             | W            | 2            | 19            | 13           |
| 182             | M            | 2            | 2             | 1254         |
| 182             | M            | 2            | 5             | 78           |
| 225             | M            | 3            | 8             | 1434         |
| 225             | S            | 3            | 8             | 46           |
| 225             | M            | 3            | 28            | 12           |
| 225             | M            | 3            | 4             | 1            |
| 244             | W            | 1            | 487           | 1488         |
| 263             | W            | 2            | 7             | 1474         |
| 263             | M            | 2            | 7             | 3            |
| 263             | W            | 2            | 29            | 1            |
| 273             | S            | 3            | 12            | 1394         |
| 273             | S            | 3            | 21            | 29           |
| 273             | S            | 3            | 23            | 25           |
| 273             | S            | 3            | 11            | 12           |
| 273             | S            | 3            | 8             | 8            |
| 273             | M            | 3            | 12            | 8            |
| 273             | S            | 3            | 20            | 5            |
| 273             | M            | 3            | 23            | 1            |
| 308             | W            | 2            | 14            | 1428         |
| 308             | M            | 2            | 14            | 50           |
| 308             | W            | 2            | 8             | 2            |
| 308             | W            | 2            | 18            | 1            |
| 308             | M            | 2            | 5             | 1            |
| 308             | W            | 2            | 12            | 1            |
| 335             | W            | 2            | 5             | 367          |
| 335             | M            | 2            | 5             | 1            |
| 341             | M            | 2            | 3             | 1491         |



|     |   |   |     |      |
|-----|---|---|-----|------|
| 341 | M | 2 | 7   | 1    |
| 341 | W | 2 | 3   | 1    |
| 422 | M | 2 | 6   | 1154 |
| 422 | M | 2 | 4   | 340  |
| 422 | M | 2 | 35  | 2    |
| 422 | M | 2 | 34  | 1    |
| 422 | S | 2 | 6   | 1    |
| 450 | M | 3 | 10  | 946  |
| 450 | M | 3 | 31  | 477  |
| 450 | M | 3 | 20  | 36   |
| 450 | M | 3 | 5   | 8    |
| 450 | M | 3 | 17  | 7    |
| 450 | M | 3 | 30  | 6    |
| 450 | W | 3 | 10  | 4    |
| 450 | M | 3 | 48  | 2    |
| 450 | M | 3 | 47  | 2    |
| 450 | W | 3 | 3   | 2    |
| 450 | M | 3 | 28  | 1    |
| 450 | M | 3 | 27  | 1    |
| 485 | M | 2 | 14  | 1423 |
| 485 | M | 2 | 13  | 33   |
| 485 | S | 2 | 14  | 1    |
| 485 | W | 2 | 14  | 1    |
| 492 | S | 3 | 17  | 1364 |
| 492 | S | 3 | 6   | 40   |
| 492 | S | 3 | 33  | 12   |
| 492 | S | 3 | 3   | 9    |
| 492 | S | 3 | 34  | 7    |
| 492 | S | 3 | 16  | 7    |
| 492 | M | 3 | 17  | 3    |
| 492 | S | 3 | 7   | 1    |
| 492 | S | 3 | 14  | 1    |
| 492 | S | 3 | 13  | 1    |
| 512 | M | 2 | 5   | 616  |
| 512 | M | 2 | 4   | 20   |
| 571 | M | 1 | 378 | 131  |
| 593 | W | 2 | 23  | 1366 |
| 593 | W | 2 | 6   | 60   |
| 593 | W | 2 | 31  | 2    |
| 593 | W | 2 | 25  | 2    |
| 593 | W | 2 | 12  | 2    |
| 593 | W | 2 | 13  | 1    |
| 593 | M | 2 | 23  | 1    |

|     |   |   |     |      |
|-----|---|---|-----|------|
| 596 | M | 2 | 22  | 1404 |
| 596 | M | 2 | 5   | 79   |
| 596 | M | 2 | 11  | 3    |
| 596 | M | 2 | 30  | 2    |
| 596 | M | 2 | 24  | 2    |
| 596 | M | 2 | 6   | 1    |
| 596 | M | 2 | 12  | 1    |
| 596 | S | 2 | 22  | 1    |
| 724 | S | 1 | 327 | 1266 |
| 724 | M | 1 | 327 | 5    |
| 755 | W | 2 | 29  | 783  |
| 755 | W | 2 | 3   | 668  |
| 755 | W | 2 | 21  | 15   |
| 755 | W | 2 | 2   | 11   |
| 755 | W | 2 | 12  | 8    |
| 755 | W | 2 | 20  | 2    |
| 755 | W | 2 | 28  | 2    |
| 755 | W | 2 | 26  | 1    |
| 758 | M | 2 | 28  | 733  |
| 758 | M | 2 | 2   | 583  |
| 758 | M | 2 | 20  | 15   |
| 758 | M | 2 | 11  | 8    |
| 758 | M | 2 | 19  | 2    |
| 758 | M | 2 | 27  | 1    |
| 779 | S | 2 | 21  | 1467 |
| 779 | S | 2 | 13  | 15   |
| 779 | S | 2 | 4   | 10   |
| 779 | S | 2 | 20  | 3    |
| 779 | S | 2 | 12  | 2    |
| 779 | S | 2 | 18  | 1    |
| 779 | M | 2 | 21  | 1    |
| 803 | M | 2 | 13  | 1473 |
| 803 | M | 2 | 5   | 15   |
| 803 | M | 2 | 12  | 3    |
| 803 | M | 2 | 4   | 2    |
| 803 | M | 2 | 10  | 1    |
| 841 | M | 1 | 288 | 1500 |
| 860 | S | 2 | 14  | 776  |
| 860 | S | 2 | 11  | 701  |
| 860 | M | 2 | 11  | 1    |
| 860 | S | 2 | 35  | 1    |
| 860 | S | 2 | 8   | 1    |
| 892 | M | 1 | 271 | 783  |

|      |   |   |     |      |
|------|---|---|-----|------|
| 913  | M | 1 | 264 | 1496 |
| 951  | M | 3 | 18  | 1308 |
| 951  | M | 3 | 55  | 120  |
| 951  | M | 3 | 8   | 18   |
| 951  | M | 3 | 16  | 11   |
| 951  | M | 3 | 2   | 5    |
| 951  | M | 3 | 23  | 2    |
| 951  | M | 3 | 7   | 1    |
| 951  | M | 3 | 5   | 1    |
| 951  | M | 3 | 57  | 1    |
| 951  | M | 3 | 21  | 1    |
| 1077 | S | 3 | 13  | 1415 |
| 1077 | S | 3 | 15  | 34   |
| 1077 | M | 3 | 13  | 27   |
| 1077 | S | 3 | 37  | 20   |
| 1077 | S | 3 | 5   | 2    |
| 1077 | S | 3 | 14  | 1    |
| 1087 | S | 1 | 206 | 1495 |
| 1087 | M | 1 | 206 | 5    |
| 1094 | M | 2 | 26  | 1475 |
| 1094 | M | 2 | 40  | 4    |
| 1103 | S | 2 | 23  | 1445 |
| 1103 | S | 2 | 37  | 7    |
| 1121 | M | 2 | 17  | 783  |
| 1121 | S | 2 | 17  | 19   |
| 1121 | W | 2 | 17  | 1    |
| 1121 | M | 2 | 31  | 1    |
| 1175 | M | 2 | 13  | 1460 |
| 1175 | M | 2 | 9   | 22   |
| 1175 | M | 2 | 6   | 15   |
| 1175 | M | 2 | 2   | 2    |
| 1213 | M | 1 | 164 | 1501 |
| 1288 | S | 1 | 139 | 1494 |
| 1288 | M | 1 | 139 | 3    |
| 1307 | W | 2 | 18  | 1422 |
| 1307 | W | 2 | 62  | 41   |
| 1307 | W | 2 | 11  | 22   |
| 1307 | W | 2 | 9   | 12   |
| 1307 | W | 2 | 25  | 2    |
| 1307 | W | 2 | 12  | 1    |
| 1322 | M | 2 | 13  | 1395 |
| 1322 | M | 2 | 57  | 41   |
| 1322 | M | 2 | 6   | 22   |

|      |   |   |     |      |
|------|---|---|-----|------|
| 1322 | M | 2 | 4   | 10   |
| 1322 | M | 2 | 20  | 2    |
| 1322 | M | 2 | 7   | 1    |
| 1342 | M | 1 | 121 | 1498 |
| 1342 | W | 1 | 121 | 1    |
| 1349 | M | 2 | 4   | 1447 |
| 1349 | M | 2 | 48  | 44   |
| 1349 | M | 2 | 11  | 2    |
| 1370 | W | 2 | 41  | 1390 |
| 1370 | W | 2 | 4   | 84   |
| 1370 | W | 2 | 38  | 9    |
| 1370 | W | 2 | 57  | 9    |
| 1370 | W | 2 | 22  | 1    |
| 1370 | W | 2 | 15  | 1    |
| 1370 | M | 2 | 4   | 1    |
| 1379 | W | 2 | 38  | 1390 |
| 1379 | W | 2 | 35  | 9    |
| 1379 | W | 2 | 54  | 9    |
| 1379 | M | 2 | 38  | 1    |
| 1379 | W | 2 | 19  | 1    |
| 1379 | W | 2 | 12  | 1    |
| 1424 | M | 2 | 23  | 1472 |
| 1424 | M | 2 | 20  | 11   |
| 1424 | M | 2 | 39  | 9    |
| 1424 | M | 2 | 4   | 1    |
| 1442 | S | 2 | 17  | 123  |
| 1467 | W | 3 | 2   | 78   |
| 1475 | M | 2 | 6   | 1436 |
| 1475 | S | 2 | 6   | 19   |
| 1475 | M | 2 | 3   | 11   |
| 1475 | M | 2 | 22  | 9    |
| 1479 | W | 3 | 10  | 1329 |
| 1479 | W | 3 | 5   | 2    |
| 1479 | W | 3 | 2   | 1    |
| 1479 | W | 3 | 71  | 1    |
| 1483 | M | 1 | 74  | 1489 |
| 1508 | W | 2 | 11  | 1218 |
| 1508 | W | 2 | 9   | 3    |
| 1508 | W | 2 | 8   | 3    |
| 1508 | W | 2 | 16  | 2    |
| 1508 | W | 2 | 6   | 1    |
| 1508 | W | 2 | 7   | 1    |
| 1579 | M | 1 | 42  | 126  |

|      |   |   |    |      |
|------|---|---|----|------|
| 1579 | S | 1 | 42 | 1    |
| 1642 | S | 1 | 21 | 1183 |
| 1642 | M | 1 | 21 | 301  |
| 1645 | S | 1 | 20 | 148  |
| 1645 | M | 1 | 20 | 4    |
| 1666 | W | 1 | 13 | 1499 |

**Table S16. Length and count data for influenza A putative ORFs accompanying Figure S14 (H6).**

| <b>Position</b> | <b>Kozak</b> | <b>Frame</b> | <b>Length</b> | <b>Count</b> |
|-----------------|--------------|--------------|---------------|--------------|
| 1               | W            | 1            | 566           | 1085         |
| 25              | M            | 1            | 558           | 93           |
| 57              | M            | 3            | 27            | 165          |
| 57              | M            | 3            | 17            | 159          |
| 57              | M            | 3            | 6             | 109          |
| 57              | M            | 3            | 69            | 2            |
| 57              | M            | 3            | 7             | 1            |
| 71              | M            | 2            | 8             | 410          |
| 71              | M            | 2            | 16            | 279          |
| 71              | M            | 2            | 25            | 210          |
| 71              | M            | 2            | 12            | 146          |
| 71              | M            | 2            | 37            | 31           |
| 71              | M            | 2            | 18            | 6            |
| 71              | M            | 2            | 11            | 1            |
| 71              | W            | 2            | 16            | 1            |
| 116             | M            | 2            | 10            | 217          |
| 116             | M            | 2            | 22            | 31           |
| 116             | M            | 2            | 3             | 30           |
| 116             | M            | 2            | 29            | 5            |
| 205             | M            | 1            | 498           | 127          |
| 210             | M            | 3            | 18            | 366          |
| 210             | M            | 3            | 13            | 89           |
| 210             | M            | 3            | 3             | 6            |
| 210             | M            | 3            | 29            | 6            |
| 210             | M            | 3            | 60            | 1            |
| 246             | W            | 3            | 6             | 668          |
| 246             | W            | 3            | 17            | 56           |
| 246             | M            | 3            | 6             | 22           |
| 299             | W            | 2            | 11            | 474          |
| 299             | W            | 2            | 14            | 1            |
| 308             | S            | 2            | 8             | 1049         |
| 308             | S            | 2            | 11            | 3            |
| 308             | S            | 2            | 7             | 3            |
| 308             | M            | 2            | 8             | 2            |
| 315             | M            | 3            | 20            | 123          |
| 315             | M            | 3            | 7             | 28           |
| 315             | M            | 3            | 25            | 1            |
| 335             | W            | 2            | 2             | 407          |
| 335             | W            | 2            | 5             | 282          |

|     |   |   |     |      |
|-----|---|---|-----|------|
| 335 | M | 2 | 5   | 1    |
| 394 | M | 1 | 435 | 1083 |
| 394 | W | 1 | 435 | 1    |
| 411 | M | 3 | 17  | 392  |
| 411 | M | 3 | 16  | 223  |
| 411 | M | 3 | 7   | 105  |
| 411 | M | 3 | 6   | 82   |
| 411 | M | 3 | 14  | 53   |
| 411 | M | 3 | 62  | 11   |
| 411 | M | 3 | 32  | 7    |
| 411 | M | 3 | 40  | 7    |
| 411 | S | 3 | 6   | 2    |
| 411 | M | 3 | 23  | 1    |
| 411 | M | 3 | 34  | 1    |
| 458 | W | 2 | 13  | 74   |
| 458 | M | 2 | 13  | 1    |
| 461 | S | 2 | 12  | 114  |
| 461 | M | 2 | 12  | 1    |
| 461 | W | 2 | 12  | 1    |
| 464 | S | 2 | 11  | 224  |
| 464 | M | 2 | 11  | 1    |
| 492 | M | 3 | 13  | 729  |
| 492 | M | 3 | 35  | 61   |
| 492 | S | 3 | 5   | 43   |
| 492 | S | 3 | 13  | 41   |
| 492 | M | 3 | 3   | 4    |
| 492 | M | 3 | 5   | 2    |
| 492 | M | 3 | 20  | 1    |
| 492 | S | 3 | 7   | 1    |
| 599 | W | 2 | 22  | 130  |
| 605 | W | 2 | 20  | 530  |
| 605 | M | 2 | 20  | 6    |
| 614 | M | 2 | 17  | 340  |
| 614 | M | 2 | 31  | 2    |
| 623 | M | 2 | 14  | 1010 |
| 623 | M | 2 | 8   | 2    |
| 623 | M | 2 | 28  | 2    |
| 641 | M | 2 | 8   | 351  |
| 649 | S | 1 | 350 | 1040 |
| 664 | M | 1 | 345 | 1082 |
| 664 | S | 1 | 345 | 1    |
| 710 | M | 2 | 13  | 707  |
| 710 | M | 2 | 19  | 37   |

|      |   |   |    |     |
|------|---|---|----|-----|
| 710  | M | 2 | 6  | 2   |
| 710  | M | 2 | 2  | 1   |
| 770  | W | 2 | 7  | 563 |
| 770  | W | 2 | 46 | 12  |
| 782  | M | 2 | 3  | 768 |
| 782  | M | 2 | 42 | 12  |
| 782  | S | 2 | 3  | 1   |
| 806  | M | 2 | 34 | 517 |
| 806  | M | 2 | 33 | 303 |
| 806  | M | 2 | 30 | 138 |
| 806  | M | 2 | 20 | 49  |
| 806  | M | 2 | 5  | 10  |
| 806  | M | 2 | 7  | 5   |
| 806  | M | 2 | 18 | 4   |
| 806  | M | 2 | 4  | 2   |
| 806  | M | 2 | 31 | 1   |
| 806  | M | 2 | 11 | 1   |
| 806  | M | 2 | 43 | 1   |
| 878  | M | 2 | 10 | 569 |
| 878  | M | 2 | 9  | 356 |
| 878  | M | 2 | 6  | 134 |
| 878  | M | 2 | 7  | 1   |
| 878  | M | 2 | 19 | 1   |
| 885  | W | 3 | 11 | 415 |
| 885  | W | 3 | 4  | 336 |
| 885  | W | 3 | 10 | 23  |
| 885  | W | 3 | 31 | 7   |
| 885  | W | 3 | 46 | 6   |
| 885  | M | 3 | 11 | 6   |
| 885  | W | 3 | 3  | 5   |
| 885  | W | 3 | 17 | 3   |
| 885  | M | 3 | 4  | 1   |
| 932  | M | 2 | 18 | 85  |
| 932  | M | 2 | 6  | 6   |
| 932  | M | 2 | 13 | 1   |
| 957  | M | 3 | 7  | 797 |
| 957  | M | 3 | 5  | 117 |
| 957  | M | 3 | 22 | 60  |
| 957  | M | 3 | 24 | 16  |
| 957  | M | 3 | 16 | 4   |
| 968  | M | 2 | 6  | 136 |
| 1010 | M | 2 | 24 | 492 |
| 1010 | M | 2 | 4  | 411 |



|      |   |   |     |      |
|------|---|---|-----|------|
| 1010 | M | 2 | 13  | 142  |
| 1010 | M | 2 | 25  | 18   |
| 1010 | M | 2 | 17  | 8    |
| 1071 | S | 3 | 13  | 623  |
| 1071 | S | 3 | 5   | 359  |
| 1071 | S | 3 | 32  | 4    |
| 1071 | S | 3 | 37  | 3    |
| 1071 | S | 3 | 64  | 1    |
| 1081 | M | 1 | 206 | 936  |
| 1081 | S | 1 | 206 | 142  |
| 1088 | M | 2 | 26  | 929  |
| 1088 | M | 2 | 40  | 15   |
| 1088 | M | 2 | 37  | 5    |
| 1092 | M | 3 | 6   | 285  |
| 1092 | M | 3 | 25  | 4    |
| 1092 | M | 3 | 30  | 4    |
| 1092 | M | 3 | 57  | 1    |
| 1097 | S | 2 | 23  | 913  |
| 1097 | S | 2 | 37  | 6    |
| 1097 | S | 2 | 34  | 1    |
| 1109 | M | 2 | 19  | 1058 |
| 1109 | M | 2 | 33  | 12   |
| 1109 | M | 2 | 30  | 5    |
| 1133 | M | 2 | 11  | 1061 |
| 1133 | M | 2 | 25  | 12   |
| 1133 | M | 2 | 22  | 5    |
| 1169 | M | 2 | 13  | 92   |
| 1169 | M | 2 | 10  | 16   |
| 1169 | M | 2 | 6   | 8    |
| 1169 | M | 2 | 9   | 2    |
| 1207 | M | 1 | 164 | 1080 |
| 1207 | W | 1 | 164 | 1    |
| 1207 | S | 1 | 164 | 1    |
| 1235 | M | 2 | 12  | 424  |
| 1235 | M | 2 | 9   | 111  |
| 1235 | M | 2 | 5   | 87   |
| 1235 | M | 2 | 47  | 1    |
| 1282 | S | 1 | 139 | 1073 |
| 1282 | M | 1 | 139 | 8    |
| 1289 | S | 2 | 22  | 648  |
| 1289 | S | 2 | 3   | 301  |
| 1289 | S | 2 | 29  | 54   |
| 1289 | S | 2 | 13  | 36   |

|      |   |   |     |      |
|------|---|---|-----|------|
| 1289 | S | 2 | 82  | 2    |
| 1289 | S | 2 | 40  | 1    |
| 1301 | W | 2 | 18  | 702  |
| 1301 | W | 2 | 25  | 162  |
| 1301 | W | 2 | 9   | 51   |
| 1301 | W | 2 | 78  | 2    |
| 1301 | M | 2 | 36  | 1    |
| 1316 | M | 2 | 13  | 537  |
| 1316 | M | 2 | 20  | 281  |
| 1316 | M | 2 | 4   | 32   |
| 1316 | M | 2 | 7   | 2    |
| 1316 | M | 2 | 73  | 2    |
| 1343 | M | 2 | 11  | 164  |
| 1343 | M | 2 | 4   | 47   |
| 1343 | S | 2 | 11  | 6    |
| 1343 | M | 2 | 64  | 2    |
| 1360 | M | 1 | 113 | 251  |
| 1364 | W | 2 | 4   | 1066 |
| 1364 | W | 2 | 15  | 4    |
| 1364 | W | 2 | 57  | 2    |
| 1364 | M | 2 | 4   | 2    |
| 1367 | M | 2 | 3   | 919  |
| 1367 | M | 2 | 14  | 4    |
| 1388 | W | 2 | 7   | 763  |
| 1388 | W | 2 | 3   | 148  |
| 1388 | W | 2 | 14  | 104  |
| 1388 | W | 2 | 49  | 40   |
| 1388 | W | 2 | 30  | 22   |
| 1388 | M | 2 | 3   | 1    |
| 1418 | M | 2 | 4   | 827  |
| 1418 | M | 2 | 44  | 137  |
| 1418 | M | 2 | 39  | 52   |
| 1418 | M | 2 | 20  | 37   |
| 1418 | M | 2 | 2   | 3    |
| 1424 | W | 2 | 2   | 787  |
| 1424 | W | 2 | 18  | 33   |
| 1424 | W | 2 | 37  | 22   |
| 1436 | S | 2 | 14  | 369  |
| 1436 | S | 2 | 33  | 156  |
| 1436 | S | 2 | 38  | 140  |
| 1436 | S | 2 | 17  | 5    |
| 1440 | W | 3 | 2   | 689  |
| 1461 | W | 3 | 3   | 91   |

|      |   |   |    |      |
|------|---|---|----|------|
| 1466 | M | 2 | 23 | 40   |
| 1466 | M | 2 | 28 | 10   |
| 1466 | M | 2 | 7  | 4    |
| 1466 | M | 2 | 4  | 1    |
| 1469 | M | 2 | 22 | 516  |
| 1469 | M | 2 | 3  | 397  |
| 1469 | M | 2 | 27 | 140  |
| 1469 | M | 2 | 6  | 5    |
| 1473 | W | 3 | 10 | 546  |
| 1473 | W | 3 | 5  | 133  |
| 1473 | W | 3 | 17 | 76   |
| 1473 | W | 3 | 2  | 4    |
| 1473 | W | 3 | 4  | 1    |
| 1473 | W | 3 | 7  | 1    |
| 1477 | M | 1 | 74 | 422  |
| 1493 | S | 2 | 14 | 924  |
| 1493 | S | 2 | 19 | 144  |
| 1493 | M | 2 | 14 | 1    |
| 1502 | W | 2 | 11 | 607  |
| 1502 | W | 2 | 16 | 134  |
| 1502 | M | 2 | 11 | 1    |
| 1523 | M | 2 | 4  | 243  |
| 1523 | M | 2 | 9  | 1    |
| 1561 | M | 1 | 46 | 130  |
| 1642 | S | 1 | 19 | 270  |
| 1648 | S | 1 | 17 | 1024 |
| 1648 | M | 1 | 17 | 3    |
| 1660 | W | 1 | 13 | 1085 |
| 1678 | W | 1 | 7  | 1083 |
| 1678 | M | 1 | 7  | 1    |

**Table S17. Length and count data for influenza A putative ORFs accompanying Figure S15 (H7).**

| <b>Position</b> | <b>Kozak</b> | <b>Frame</b> | <b>Length</b> | <b>Count</b> |
|-----------------|--------------|--------------|---------------|--------------|
| 1               | W            | 1            | 560           | 750          |
| 34              | W            | 1            | 549           | 284          |
| 50              | W            | 2            | 17            | 387          |
| 50              | W            | 2            | 12            | 2            |
| 63              | M            | 3            | 21            | 298          |
| 63              | M            | 3            | 35            | 24           |
| 63              | M            | 3            | 11            | 20           |
| 63              | M            | 3            | 69            | 4            |
| 63              | M            | 3            | 17            | 1            |
| 77              | M            | 2            | 8             | 732          |
| 77              | M            | 2            | 2             | 9            |
| 77              | M            | 2            | 11            | 4            |
| 77              | M            | 2            | 3             | 3            |
| 77              | M            | 2            | 18            | 1            |
| 89              | M            | 2            | 4             | 351          |
| 89              | M            | 2            | 7             | 4            |
| 89              | S            | 2            | 4             | 2            |
| 89              | M            | 2            | 14            | 1            |
| 137             | W            | 2            | 42            | 284          |
| 137             | W            | 2            | 29            | 164          |
| 137             | W            | 2            | 8             | 110          |
| 137             | W            | 2            | 5             | 17           |
| 137             | W            | 2            | 23            | 15           |
| 137             | W            | 2            | 19            | 11           |
| 137             | W            | 2            | 32            | 6            |
| 137             | W            | 2            | 10            | 3            |
| 137             | W            | 2            | 31            | 2            |
| 137             | W            | 2            | 21            | 1            |
| 164             | W            | 2            | 33            | 37           |
| 164             | W            | 2            | 20            | 6            |
| 164             | W            | 2            | 23            | 5            |
| 164             | W            | 2            | 39            | 1            |
| 177             | M            | 3            | 31            | 278          |
| 177             | M            | 3            | 25            | 27           |
| 177             | M            | 3            | 8             | 9            |
| 177             | M            | 3            | 10            | 1            |
| 177             | M            | 3            | 29            | 1            |
| 213             | W            | 3            | 13            | 404          |
| 213             | M            | 3            | 19            | 275          |

|     |   |   |     |     |
|-----|---|---|-----|-----|
| 213 | M | 3 | 13  | 38  |
| 213 | W | 3 | 19  | 8   |
| 213 | M | 3 | 17  | 1   |
| 249 | W | 3 | 7   | 273 |
| 249 | W | 3 | 9   | 4   |
| 249 | W | 3 | 5   | 1   |
| 249 | M | 3 | 7   | 1   |
| 272 | W | 2 | 3   | 82  |
| 272 | W | 2 | 4   | 4   |
| 305 | M | 2 | 9   | 36  |
| 305 | M | 2 | 14  | 13  |
| 305 | M | 2 | 36  | 2   |
| 308 | M | 2 | 8   | 409 |
| 308 | W | 2 | 13  | 284 |
| 308 | M | 2 | 13  | 43  |
| 308 | M | 2 | 35  | 2   |
| 335 | W | 2 | 4   | 692 |
| 335 | M | 2 | 4   | 23  |
| 335 | W | 2 | 26  | 5   |
| 391 | S | 1 | 430 | 416 |
| 391 | M | 1 | 430 | 329 |
| 422 | M | 2 | 17  | 694 |
| 422 | M | 2 | 2   | 45  |
| 422 | M | 2 | 9   | 6   |
| 422 | M | 2 | 7   | 1   |
| 464 | W | 2 | 3   | 745 |
| 472 | M | 1 | 403 | 750 |
| 477 | S | 3 | 7   | 206 |
| 477 | S | 3 | 15  | 179 |
| 477 | S | 3 | 90  | 11  |
| 477 | S | 3 | 6   | 10  |
| 477 | S | 3 | 18  | 8   |
| 477 | S | 3 | 5   | 6   |
| 477 | S | 3 | 54  | 4   |
| 477 | S | 3 | 39  | 2   |
| 477 | S | 3 | 57  | 2   |
| 477 | S | 3 | 8   | 2   |
| 477 | S | 3 | 80  | 1   |
| 477 | S | 3 | 9   | 1   |
| 500 | M | 2 | 6   | 649 |
| 500 | M | 2 | 19  | 90  |
| 500 | M | 2 | 5   | 1   |
| 500 | S | 2 | 6   | 1   |

|     |   |   |     |     |
|-----|---|---|-----|-----|
| 517 | W | 1 | 388 | 646 |
| 564 | S | 3 | 28  | 311 |
| 564 | S | 3 | 25  | 49  |
| 564 | S | 3 | 51  | 22  |
| 564 | S | 3 | 17  | 6   |
| 564 | S | 3 | 13  | 4   |
| 564 | S | 3 | 20  | 2   |
| 564 | S | 3 | 10  | 2   |
| 564 | S | 3 | 36  | 1   |
| 593 | W | 2 | 12  | 80  |
| 611 | M | 2 | 6   | 529 |
| 611 | M | 2 | 7   | 132 |
| 698 | M | 2 | 11  | 409 |
| 698 | M | 2 | 19  | 324 |
| 698 | M | 2 | 13  | 1   |
| 733 | W | 1 | 316 | 346 |
| 733 | M | 1 | 316 | 7   |
| 746 | W | 2 | 12  | 416 |
| 746 | W | 2 | 3   | 310 |
| 746 | W | 2 | 17  | 2   |
| 746 | M | 2 | 12  | 1   |
| 770 | M | 2 | 4   | 739 |
| 770 | M | 2 | 17  | 3   |
| 770 | M | 2 | 9   | 2   |
| 820 | M | 1 | 287 | 396 |
| 836 | M | 2 | 18  | 309 |
| 836 | M | 2 | 3   | 26  |
| 836 | M | 2 | 19  | 4   |
| 836 | M | 2 | 50  | 2   |
| 848 | W | 2 | 14  | 397 |
| 848 | W | 2 | 15  | 6   |
| 878 | S | 2 | 4   | 118 |
| 939 | M | 3 | 5   | 365 |
| 939 | M | 3 | 44  | 275 |
| 939 | M | 3 | 62  | 40  |
| 939 | M | 3 | 20  | 24  |
| 939 | M | 3 | 36  | 19  |
| 939 | M | 3 | 2   | 6   |
| 939 | M | 3 | 25  | 5   |
| 939 | M | 3 | 82  | 1   |
| 939 | W | 3 | 20  | 1   |
| 939 | M | 3 | 23  | 1   |
| 950 | M | 2 | 12  | 406 |

|      |   |   |     |     |
|------|---|---|-----|-----|
| 950  | M | 2 | 8   | 231 |
| 950  | M | 2 | 6   | 92  |
| 950  | M | 2 | 4   | 1   |
| 970  | W | 1 | 237 | 92  |
| 985  | M | 1 | 232 | 750 |
| 992  | M | 2 | 14  | 386 |
| 992  | M | 2 | 18  | 60  |
| 992  | M | 2 | 25  | 9   |
| 1052 | S | 2 | 5   | 384 |
| 1052 | S | 2 | 33  | 326 |
| 1052 | S | 2 | 36  | 19  |
| 1052 | S | 2 | 40  | 1   |
| 1056 | M | 3 | 5   | 653 |
| 1056 | M | 3 | 23  | 47  |
| 1056 | M | 3 | 32  | 25  |
| 1056 | M | 3 | 43  | 1   |
| 1073 | M | 2 | 29  | 328 |
| 1073 | M | 2 | 26  | 316 |
| 1073 | M | 2 | 33  | 1   |
| 1077 | M | 3 | 16  | 290 |
| 1077 | M | 3 | 25  | 43  |
| 1077 | M | 3 | 18  | 9   |
| 1077 | M | 3 | 36  | 1   |
| 1077 | M | 3 | 2   | 1   |
| 1082 | S | 2 | 26  | 416 |
| 1082 | S | 2 | 23  | 324 |
| 1082 | M | 2 | 23  | 1   |
| 1082 | S | 2 | 30  | 1   |
| 1100 | M | 2 | 20  | 419 |
| 1100 | M | 2 | 17  | 301 |
| 1100 | M | 2 | 24  | 1   |
| 1159 | W | 1 | 174 | 46  |
| 1210 | M | 1 | 157 | 70  |
| 1220 | M | 2 | 5   | 422 |
| 1220 | M | 2 | 12  | 297 |
| 1229 | W | 2 | 2   | 114 |
| 1229 | W | 2 | 9   | 4   |
| 1253 | M | 2 | 9   | 319 |
| 1253 | M | 2 | 2   | 2   |
| 1253 | M | 2 | 29  | 1   |
| 1253 | M | 2 | 21  | 1   |
| 1279 | W | 1 | 134 | 573 |
| 1279 | M | 1 | 134 | 6   |

|      |   |   |     |     |
|------|---|---|-----|-----|
| 1290 | S | 3 | 5   | 175 |
| 1290 | S | 3 | 3   | 72  |
| 1301 | M | 2 | 5   | 372 |
| 1301 | M | 2 | 4   | 195 |
| 1301 | M | 2 | 13  | 60  |
| 1301 | M | 2 | 7   | 1   |
| 1301 | M | 2 | 12  | 1   |
| 1301 | W | 2 | 13  | 1   |
| 1321 | S | 1 | 120 | 744 |
| 1321 | M | 1 | 120 | 1   |
| 1360 | M | 1 | 107 | 668 |
| 1360 | S | 1 | 107 | 79  |
| 1373 | W | 2 | 7   | 57  |
| 1373 | W | 2 | 3   | 36  |
| 1373 | W | 2 | 33  | 2   |
| 1403 | M | 2 | 49  | 370 |
| 1403 | M | 2 | 23  | 342 |
| 1403 | M | 2 | 42  | 5   |
| 1403 | M | 2 | 56  | 1   |
| 1403 | W | 2 | 23  | 1   |
| 1403 | M | 2 | 47  | 1   |
| 1403 | M | 2 | 41  | 1   |
| 1415 | S | 2 | 45  | 390 |
| 1415 | S | 2 | 19  | 333 |
| 1415 | S | 2 | 38  | 10  |
| 1415 | S | 2 | 43  | 2   |
| 1415 | S | 2 | 52  | 1   |
| 1415 | S | 2 | 37  | 1   |
| 1425 | W | 3 | 2   | 319 |
| 1451 | M | 2 | 33  | 393 |
| 1451 | M | 2 | 7   | 338 |
| 1451 | M | 2 | 26  | 4   |
| 1451 | M | 2 | 31  | 2   |
| 1451 | M | 2 | 40  | 1   |
| 1451 | M | 2 | 25  | 1   |
| 1454 | M | 2 | 32  | 202 |
| 1454 | M | 2 | 6   | 4   |
| 1454 | M | 2 | 24  | 1   |
| 1454 | M | 2 | 39  | 1   |
| 1462 | M | 1 | 73  | 750 |
| 1487 | W | 2 | 21  | 404 |
| 1487 | W | 2 | 16  | 323 |
| 1487 | W | 2 | 14  | 7   |



|      |   |   |    |     |
|------|---|---|----|-----|
| 1487 | W | 2 | 19 | 2   |
| 1487 | M | 2 | 21 | 1   |
| 1487 | W | 2 | 28 | 1   |
| 1487 | W | 2 | 13 | 1   |
| 1516 | M | 1 | 55 | 418 |
| 1578 | M | 3 | 2  | 314 |
| 1624 | S | 1 | 19 | 743 |
| 1624 | M | 1 | 19 | 2   |
| 1639 | W | 1 | 14 | 39  |
| 1660 | M | 1 | 7  | 749 |

**Table S18. Length and count data for influenza A putative ORFs accompanying Figure S16 (H8).**

| <b>Position</b> | <b>Kozak</b> | <b>Frame</b> | <b>Length</b> | <b>Count</b> |
|-----------------|--------------|--------------|---------------|--------------|
| 1               | W            | 1            | 566           | 92           |
| 19              | S            | 1            | 560           | 18           |
| 19              | M            | 1            | 560           | 8            |
| 25              | M            | 1            | 558           | 92           |
| 44              | W            | 2            | 18            | 90           |
| 44              | W            | 2            | 22            | 1            |
| 50              | W            | 2            | 16            | 21           |
| 60              | M            | 3            | 39            | 53           |
| 60              | M            | 3            | 41            | 18           |
| 60              | M            | 3            | 7             | 11           |
| 60              | M            | 3            | 10            | 9            |
| 60              | M            | 3            | 50            | 1            |
| 119             | M            | 2            | 23            | 72           |
| 119             | M            | 2            | 9             | 9            |
| 119             | M            | 2            | 12            | 4            |
| 119             | M            | 2            | 37            | 2            |
| 119             | M            | 2            | 27            | 2            |
| 119             | M            | 2            | 10            | 1            |
| 139             | S            | 1            | 520           | 92           |
| 236             | M            | 2            | 9             | 41           |
| 316             | M            | 1            | 461           | 92           |
| 371             | W            | 2            | 7             | 73           |
| 414             | M            | 3            | 22            | 13           |
| 414             | M            | 3            | 29            | 8            |
| 414             | M            | 3            | 39            | 1            |
| 414             | M            | 3            | 4             | 1            |
| 419             | M            | 2            | 26            | 8            |
| 419             | M            | 2            | 13            | 1            |
| 447             | M            | 3            | 11            | 83           |
| 447             | M            | 3            | 18            | 8            |
| 447             | M            | 3            | 28            | 1            |
| 452             | M            | 2            | 15            | 75           |
| 452             | M            | 2            | 2             | 5            |
| 521             | W            | 2            | 40            | 66           |
| 521             | W            | 2            | 15            | 2            |
| 530             | W            | 2            | 37            | 83           |
| 530             | W            | 2            | 12            | 8            |
| 542             | M            | 2            | 33            | 63           |
| 542             | W            | 2            | 33            | 10           |

|      |   |   |     |    |
|------|---|---|-----|----|
| 551  | M | 2 | 30  | 78 |
| 551  | M | 2 | 5   | 7  |
| 557  | S | 2 | 28  | 84 |
| 557  | S | 2 | 3   | 7  |
| 576  | M | 3 | 7   | 71 |
| 576  | M | 3 | 16  | 10 |
| 576  | M | 3 | 23  | 8  |
| 599  | W | 2 | 14  | 20 |
| 629  | M | 2 | 4   | 92 |
| 727  | S | 1 | 324 | 83 |
| 727  | M | 1 | 324 | 9  |
| 782  | M | 2 | 3   | 87 |
| 833  | S | 2 | 3   | 85 |
| 833  | S | 2 | 46  | 1  |
| 851  | M | 2 | 40  | 84 |
| 851  | M | 2 | 5   | 1  |
| 851  | M | 2 | 77  | 1  |
| 885  | M | 3 | 9   | 73 |
| 885  | M | 3 | 8   | 14 |
| 896  | W | 2 | 25  | 82 |
| 896  | W | 2 | 62  | 1  |
| 932  | M | 2 | 13  | 90 |
| 932  | M | 2 | 50  | 1  |
| 949  | M | 1 | 250 | 92 |
| 957  | M | 3 | 16  | 77 |
| 957  | M | 3 | 8   | 1  |
| 1071 | S | 3 | 5   | 47 |
| 1081 | M | 1 | 206 | 92 |
| 1088 | M | 2 | 36  | 88 |
| 1088 | M | 2 | 29  | 1  |
| 1088 | M | 2 | 33  | 1  |
| 1092 | M | 3 | 7   | 45 |
| 1092 | M | 3 | 16  | 21 |
| 1092 | M | 3 | 6   | 10 |
| 1097 | S | 2 | 33  | 89 |
| 1097 | S | 2 | 26  | 1  |
| 1097 | S | 2 | 30  | 1  |
| 1132 | S | 1 | 189 | 91 |
| 1207 | M | 1 | 164 | 92 |
| 1235 | M | 2 | 9   | 90 |
| 1235 | M | 2 | 11  | 1  |
| 1267 | M | 1 | 144 | 88 |
| 1267 | S | 1 | 144 | 2  |

|      |   |   |    |    |
|------|---|---|----|----|
| 1274 | W | 2 | 3  | 70 |
| 1274 | W | 2 | 21 | 8  |
| 1274 | W | 2 | 18 | 1  |
| 1286 | W | 2 | 17 | 82 |
| 1286 | W | 2 | 14 | 1  |
| 1316 | M | 2 | 7  | 54 |
| 1316 | M | 2 | 4  | 1  |
| 1358 | W | 2 | 13 | 8  |
| 1364 | M | 2 | 11 | 87 |
| 1373 | W | 2 | 8  | 92 |
| 1391 | W | 2 | 2  | 86 |
| 1418 | W | 2 | 2  | 90 |
| 1418 | W | 2 | 23 | 2  |
| 1427 | W | 2 | 20 | 85 |
| 1436 | S | 2 | 17 | 33 |
| 1461 | W | 3 | 3  | 34 |
| 1461 | W | 3 | 2  | 15 |
| 1469 | M | 2 | 6  | 82 |
| 1469 | S | 2 | 6  | 1  |
| 1473 | W | 3 | 12 | 36 |
| 1477 | M | 1 | 74 | 92 |
| 1493 | S | 2 | 14 | 72 |
| 1493 | S | 2 | 22 | 8  |
| 1493 | S | 2 | 19 | 1  |
| 1517 | M | 2 | 6  | 83 |
| 1517 | M | 2 | 14 | 8  |
| 1517 | M | 2 | 11 | 1  |
| 1553 | M | 2 | 2  | 84 |
| 1663 | M | 1 | 12 | 92 |
| 1687 | W | 1 | 4  | 92 |

**Table S19. Length and count data for influenza A putative ORFs accompanying Figure S17 (H9).**

| <b>Position</b> | <b>Kozak</b> | <b>Frame</b> | <b>Length</b> | <b>Count</b> |
|-----------------|--------------|--------------|---------------|--------------|
| 1               | W            | 1            | 560           | 1180         |
| 19              | W            | 1            | 554           | 144          |
| 19              | M            | 1            | 554           | 10           |
| 25              | M            | 1            | 552           | 144          |
| 34              | M            | 1            | 549           | 54           |
| 34              | S            | 1            | 549           | 4            |
| 34              | W            | 1            | 549           | 3            |
| 50              | M            | 2            | 17            | 591          |
| 50              | M            | 2            | 20            | 470          |
| 50              | M            | 2            | 6             | 51           |
| 50              | W            | 2            | 17            | 19           |
| 50              | W            | 2            | 20            | 9            |
| 50              | M            | 2            | 27            | 2            |
| 50              | M            | 2            | 21            | 2            |
| 50              | W            | 2            | 6             | 1            |
| 63              | M            | 3            | 19            | 32           |
| 63              | M            | 3            | 54            | 16           |
| 63              | M            | 3            | 32            | 10           |
| 63              | M            | 3            | 34            | 8            |
| 63              | M            | 3            | 26            | 2            |
| 63              | M            | 3            | 17            | 1            |
| 122             | M            | 2            | 3             | 828          |
| 122             | W            | 2            | 3             | 287          |
| 122             | M            | 2            | 29            | 17           |
| 122             | W            | 2            | 29            | 1            |
| 137             | W            | 2            | 24            | 854          |
| 137             | W            | 2            | 18            | 64           |
| 137             | W            | 2            | 32            | 21           |
| 137             | W            | 2            | 67            | 21           |
| 137             | W            | 2            | 22            | 10           |
| 137             | W            | 2            | 4             | 2            |
| 167             | S            | 2            | 14            | 1014         |
| 167             | S            | 2            | 8             | 76           |
| 167             | S            | 2            | 22            | 31           |
| 167             | S            | 2            | 57            | 21           |
| 167             | S            | 2            | 12            | 17           |
| 167             | M            | 2            | 14            | 5            |
| 167             | S            | 2            | 48            | 3            |
| 167             | M            | 2            | 8             | 1            |

|     |   |   |     |      |
|-----|---|---|-----|------|
| 167 | S | 2 | 19  | 1    |
| 172 | M | 1 | 503 | 1170 |
| 177 | M | 3 | 16  | 189  |
| 177 | M | 3 | 26  | 39   |
| 177 | M | 3 | 14  | 22   |
| 177 | M | 3 | 22  | 11   |
| 177 | M | 3 | 11  | 2    |
| 216 | W | 3 | 13  | 107  |
| 216 | W | 3 | 3   | 91   |
| 216 | W | 3 | 9   | 55   |
| 216 | W | 3 | 51  | 1    |
| 216 | M | 3 | 3   | 1    |
| 239 | M | 2 | 33  | 700  |
| 239 | M | 2 | 24  | 243  |
| 239 | M | 2 | 9   | 55   |
| 239 | M | 2 | 18  | 34   |
| 239 | M | 2 | 36  | 18   |
| 239 | M | 2 | 17  | 16   |
| 239 | M | 2 | 39  | 1    |
| 239 | M | 2 | 19  | 1    |
| 279 | S | 3 | 11  | 562  |
| 279 | S | 3 | 30  | 213  |
| 279 | S | 3 | 5   | 209  |
| 279 | S | 3 | 33  | 118  |
| 279 | S | 3 | 86  | 27   |
| 279 | S | 3 | 26  | 16   |
| 279 | S | 3 | 84  | 5    |
| 279 | S | 3 | 74  | 2    |
| 279 | S | 3 | 145 | 1    |
| 279 | M | 3 | 11  | 1    |
| 279 | S | 3 | 85  | 1    |
| 314 | M | 2 | 8   | 882  |
| 314 | M | 2 | 11  | 80   |
| 314 | M | 2 | 37  | 3    |
| 314 | M | 2 | 14  | 1    |
| 319 | M | 1 | 454 | 283  |
| 319 | W | 1 | 454 | 1    |
| 321 | M | 3 | 16  | 71   |
| 321 | M | 3 | 19  | 8    |
| 321 | M | 3 | 12  | 7    |
| 321 | M | 3 | 70  | 1    |
| 335 | M | 2 | 4   | 79   |
| 335 | M | 2 | 30  | 3    |

|     |   |   |     |      |
|-----|---|---|-----|------|
| 335 | M | 2 | 7   | 2    |
| 422 | M | 2 | 18  | 685  |
| 422 | M | 2 | 6   | 7    |
| 422 | M | 2 | 11  | 1    |
| 422 | M | 2 | 8   | 1    |
| 422 | W | 2 | 18  | 1    |
| 434 | S | 2 | 14  | 84   |
| 434 | S | 2 | 2   | 3    |
| 434 | M | 2 | 14  | 1    |
| 450 | M | 3 | 28  | 811  |
| 450 | M | 3 | 29  | 85   |
| 450 | M | 3 | 68  | 65   |
| 450 | M | 3 | 6   | 56   |
| 450 | M | 3 | 45  | 54   |
| 450 | M | 3 | 16  | 38   |
| 450 | M | 3 | 2   | 19   |
| 450 | M | 3 | 27  | 11   |
| 450 | M | 3 | 13  | 8    |
| 450 | M | 3 | 14  | 4    |
| 450 | W | 3 | 28  | 3    |
| 450 | M | 3 | 17  | 2    |
| 450 | M | 3 | 88  | 1    |
| 450 | M | 3 | 50  | 1    |
| 450 | W | 3 | 27  | 1    |
| 450 | M | 3 | 15  | 1    |
| 450 | W | 3 | 15  | 1    |
| 450 | M | 3 | 57  | 1    |
| 475 | M | 1 | 402 | 1180 |
| 480 | S | 3 | 18  | 683  |
| 480 | S | 3 | 58  | 94   |
| 480 | S | 3 | 19  | 90   |
| 480 | S | 3 | 35  | 65   |
| 480 | S | 3 | 6   | 43   |
| 480 | S | 3 | 17  | 12   |
| 480 | S | 3 | 3   | 7    |
| 480 | S | 3 | 46  | 6    |
| 480 | S | 3 | 4   | 4    |
| 480 | S | 3 | 5   | 4    |
| 480 | S | 3 | 40  | 2    |
| 480 | S | 3 | 47  | 1    |
| 480 | S | 3 | 78  | 1    |
| 500 | M | 2 | 23  | 63   |
| 500 | M | 2 | 45  | 7    |

|     |   |   |     |      |
|-----|---|---|-----|------|
| 500 | M | 2 | 50  | 3    |
| 500 | M | 2 | 20  | 1    |
| 518 | M | 2 | 39  | 45   |
| 518 | M | 2 | 17  | 42   |
| 518 | M | 2 | 31  | 9    |
| 518 | M | 2 | 36  | 5    |
| 518 | M | 2 | 44  | 3    |
| 536 | M | 2 | 33  | 134  |
| 536 | S | 2 | 11  | 4    |
| 536 | M | 2 | 38  | 2    |
| 536 | S | 2 | 25  | 2    |
| 536 | M | 2 | 30  | 1    |
| 559 | W | 1 | 374 | 902  |
| 695 | M | 2 | 13  | 776  |
| 695 | M | 2 | 2   | 179  |
| 695 | W | 2 | 13  | 6    |
| 695 | M | 2 | 12  | 2    |
| 695 | M | 2 | 6   | 2    |
| 695 | M | 2 | 4   | 1    |
| 695 | M | 2 | 3   | 1    |
| 703 | M | 1 | 326 | 94   |
| 767 | M | 2 | 3   | 1045 |
| 767 | M | 2 | 21  | 3    |
| 767 | W | 2 | 3   | 2    |
| 786 | M | 3 | 17  | 855  |
| 786 | M | 3 | 22  | 146  |
| 786 | M | 3 | 30  | 60   |
| 786 | M | 3 | 20  | 32   |
| 786 | M | 3 | 12  | 22   |
| 786 | S | 3 | 17  | 6    |
| 786 | M | 3 | 15  | 6    |
| 786 | M | 3 | 11  | 4    |
| 786 | M | 3 | 45  | 2    |
| 786 | M | 3 | 8   | 1    |
| 786 | M | 3 | 21  | 1    |
| 786 | S | 3 | 12  | 1    |
| 786 | M | 3 | 2   | 1    |
| 786 | S | 3 | 15  | 1    |
| 786 | M | 3 | 72  | 1    |
| 791 | S | 2 | 13  | 988  |
| 791 | S | 2 | 5   | 78   |
| 791 | S | 2 | 17  | 7    |
| 791 | M | 2 | 13  | 6    |



|      |   |   |    |      |
|------|---|---|----|------|
| 791  | S | 2 | 7  | 3    |
| 818  | S | 2 | 4  | 515  |
| 867  | M | 3 | 18 | 557  |
| 867  | M | 3 | 3  | 423  |
| 867  | M | 3 | 45 | 97   |
| 867  | W | 3 | 3  | 24   |
| 867  | M | 3 | 48 | 1    |
| 867  | M | 3 | 34 | 1    |
| 867  | M | 3 | 17 | 1    |
| 867  | W | 3 | 18 | 1    |
| 914  | M | 2 | 15 | 258  |
| 914  | M | 2 | 24 | 20   |
| 914  | M | 2 | 13 | 1    |
| 914  | M | 2 | 22 | 1    |
| 914  | M | 2 | 39 | 1    |
| 926  | M | 2 | 11 | 739  |
| 926  | M | 2 | 20 | 214  |
| 926  | M | 2 | 16 | 35   |
| 926  | M | 2 | 9  | 17   |
| 926  | M | 2 | 18 | 8    |
| 926  | M | 2 | 35 | 6    |
| 926  | W | 2 | 11 | 3    |
| 926  | M | 2 | 14 | 1    |
| 950  | M | 2 | 3  | 404  |
| 950  | M | 2 | 12 | 29   |
| 950  | M | 2 | 10 | 2    |
| 950  | M | 2 | 8  | 2    |
| 950  | M | 2 | 27 | 2    |
| 992  | M | 2 | 13 | 927  |
| 992  | M | 2 | 17 | 16   |
| 992  | M | 2 | 5  | 13   |
| 1079 | S | 2 | 26 | 977  |
| 1079 | S | 2 | 12 | 58   |
| 1079 | S | 2 | 10 | 17   |
| 1079 | S | 2 | 30 | 4    |
| 1079 | S | 2 | 23 | 3    |
| 1079 | M | 2 | 26 | 2    |
| 1079 | S | 2 | 13 | 1    |
| 1079 | S | 2 | 18 | 1    |
| 1097 | W | 2 | 20 | 1066 |
| 1097 | W | 2 | 6  | 66   |
| 1097 | W | 2 | 4  | 17   |
| 1097 | W | 2 | 17 | 5    |

|      |   |   |     |      |
|------|---|---|-----|------|
| 1097 | W | 2 | 24  | 4    |
| 1097 | W | 2 | 7   | 1    |
| 1097 | M | 2 | 20  | 1    |
| 1097 | W | 2 | 12  | 1    |
| 1114 | S | 1 | 189 | 1098 |
| 1189 | M | 1 | 164 | 1174 |
| 1189 | S | 1 | 164 | 1    |
| 1189 | W | 1 | 164 | 1    |
| 1202 | M | 2 | 16  | 804  |
| 1202 | M | 2 | 2   | 253  |
| 1202 | M | 2 | 10  | 37   |
| 1202 | M | 2 | 14  | 32   |
| 1202 | M | 2 | 3   | 11   |
| 1202 | M | 2 | 36  | 7    |
| 1202 | S | 2 | 16  | 3    |
| 1202 | S | 2 | 52  | 1    |
| 1202 | S | 2 | 10  | 1    |
| 1217 | M | 2 | 11  | 1077 |
| 1217 | M | 2 | 9   | 46   |
| 1217 | M | 2 | 5   | 39   |
| 1217 | M | 2 | 31  | 7    |
| 1217 | S | 2 | 11  | 1    |
| 1217 | M | 2 | 47  | 1    |
| 1226 | W | 2 | 8   | 60   |
| 1226 | W | 2 | 6   | 15   |
| 1249 | M | 1 | 144 | 1168 |
| 1249 | S | 1 | 144 | 2    |
| 1256 | W | 2 | 18  | 97   |
| 1256 | W | 2 | 34  | 3    |
| 1268 | W | 2 | 14  | 1052 |
| 1268 | W | 2 | 30  | 44   |
| 1268 | W | 2 | 23  | 15   |
| 1268 | W | 2 | 4   | 5    |
| 1268 | W | 2 | 11  | 3    |
| 1268 | W | 2 | 13  | 1    |
| 1268 | W | 2 | 3   | 1    |
| 1268 | M | 2 | 14  | 1    |
| 1287 | M | 3 | 3   | 912  |
| 1287 | M | 3 | 11  | 65   |
| 1287 | M | 3 | 5   | 4    |
| 1287 | M | 3 | 18  | 2    |
| 1298 | M | 2 | 4   | 772  |
| 1298 | M | 2 | 20  | 30   |

|      |   |   |    |      |
|------|---|---|----|------|
| 1298 | M | 2 | 13 | 15   |
| 1298 | S | 2 | 4  | 1    |
| 1340 | W | 2 | 6  | 1128 |
| 1340 | W | 2 | 13 | 22   |
| 1340 | M | 2 | 6  | 1    |
| 1346 | M | 2 | 4  | 1113 |
| 1346 | M | 2 | 11 | 21   |
| 1346 | W | 2 | 4  | 1    |
| 1346 | S | 2 | 4  | 1    |
| 1349 | M | 2 | 3  | 823  |
| 1349 | M | 2 | 10 | 21   |
| 1400 | W | 2 | 39 | 963  |
| 1400 | W | 2 | 44 | 88   |
| 1400 | W | 2 | 2  | 83   |
| 1400 | W | 2 | 37 | 10   |
| 1400 | W | 2 | 30 | 5    |
| 1400 | W | 2 | 47 | 3    |
| 1400 | M | 2 | 39 | 3    |
| 1400 | W | 2 | 31 | 1    |
| 1400 | W | 2 | 21 | 1    |
| 1400 | W | 2 | 22 | 1    |
| 1405 | S | 1 | 92 | 412  |
| 1412 | S | 2 | 35 | 990  |
| 1412 | S | 2 | 40 | 87   |
| 1412 | S | 2 | 27 | 19   |
| 1412 | S | 2 | 26 | 11   |
| 1412 | S | 2 | 33 | 6    |
| 1412 | M | 2 | 35 | 3    |
| 1412 | S | 2 | 43 | 3    |
| 1412 | M | 2 | 40 | 1    |
| 1412 | S | 2 | 18 | 1    |
| 1412 | S | 2 | 17 | 1    |
| 1418 | S | 2 | 33 | 137  |
| 1418 | S | 2 | 38 | 4    |
| 1418 | S | 2 | 41 | 3    |
| 1422 | M | 3 | 8  | 364  |
| 1422 | M | 3 | 6  | 277  |
| 1422 | W | 3 | 8  | 57   |
| 1422 | W | 3 | 6  | 36   |
| 1422 | M | 3 | 2  | 35   |
| 1422 | W | 3 | 2  | 33   |
| 1422 | W | 3 | 9  | 1    |
| 1422 | M | 3 | 9  | 1    |

|      |   |   |    |      |
|------|---|---|----|------|
| 1422 | S | 3 | 8  | 1    |
| 1443 | W | 3 | 2  | 116  |
| 1443 | W | 3 | 15 | 1    |
| 1443 | M | 3 | 2  | 1    |
| 1443 | W | 3 | 14 | 1    |
| 1443 | M | 3 | 14 | 1    |
| 1448 | M | 2 | 23 | 848  |
| 1448 | M | 2 | 28 | 87   |
| 1448 | M | 2 | 15 | 19   |
| 1448 | M | 2 | 14 | 12   |
| 1448 | M | 2 | 21 | 8    |
| 1448 | M | 2 | 31 | 3    |
| 1448 | W | 2 | 21 | 2    |
| 1448 | M | 2 | 5  | 1    |
| 1448 | M | 2 | 6  | 1    |
| 1455 | W | 3 | 10 | 201  |
| 1455 | W | 3 | 5  | 174  |
| 1455 | W | 3 | 33 | 53   |
| 1455 | W | 3 | 11 | 10   |
| 1455 | W | 3 | 29 | 1    |
| 1455 | W | 3 | 13 | 1    |
| 1459 | M | 1 | 74 | 1177 |
| 1475 | S | 2 | 14 | 120  |
| 1475 | S | 2 | 19 | 6    |
| 1484 | W | 2 | 11 | 129  |
| 1484 | W | 2 | 3  | 19   |
| 1484 | W | 2 | 2  | 7    |
| 1484 | W | 2 | 16 | 4    |
| 1615 | S | 1 | 22 | 1093 |
| 1615 | M | 1 | 22 | 1    |
| 1645 | M | 1 | 12 | 1176 |
| 1645 | W | 1 | 12 | 1    |

**Table S20. Length and count data for influenza A putative ORFs accompanying Figure S18 (H10).**

| <b>Position</b> | <b>Kozak</b> | <b>Frame</b> | <b>Length</b> | <b>Count</b> |
|-----------------|--------------|--------------|---------------|--------------|
| 1               | W            | 1            | 561           | 509          |
| 44              | M            | 2            | 18            | 420          |
| 60              | M            | 3            | 27            | 402          |
| 60              | M            | 3            | 18            | 35           |
| 60              | M            | 3            | 49            | 2            |
| 74              | M            | 2            | 8             | 479          |
| 74              | M            | 2            | 2             | 20           |
| 74              | M            | 2            | 18            | 1            |
| 86              | M            | 2            | 4             | 502          |
| 86              | M            | 2            | 14            | 1            |
| 113             | W            | 2            | 5             | 59           |
| 134             | W            | 2            | 15            | 410          |
| 134             | W            | 2            | 10            | 70           |
| 134             | W            | 2            | 5             | 14           |
| 174             | M            | 3            | 7             | 48           |
| 174             | M            | 3            | 25            | 12           |
| 174             | M            | 3            | 11            | 1            |
| 178             | W            | 1            | 502           | 509          |
| 226             | S            | 1            | 486           | 255          |
| 226             | M            | 1            | 486           | 247          |
| 270             | S            | 3            | 21            | 380          |
| 270             | S            | 3            | 8             | 45           |
| 270             | S            | 3            | 5             | 43           |
| 270             | M            | 3            | 21            | 6            |
| 270             | S            | 3            | 35            | 5            |
| 270             | S            | 3            | 7             | 2            |
| 296             | M            | 2            | 11            | 65           |
| 296             | M            | 2            | 9             | 3            |
| 296             | M            | 2            | 16            | 1            |
| 332             | W            | 2            | 4             | 502          |
| 358             | S            | 1            | 442           | 508          |
| 358             | M            | 1            | 442           | 1            |
| 401             | M            | 2            | 14            | 454          |
| 401             | M            | 2            | 4             | 35           |
| 401             | W            | 2            | 14            | 8            |
| 401             | M            | 2            | 11            | 2            |
| 401             | M            | 2            | 25            | 1            |
| 401             | W            | 2            | 4             | 1            |
| 438             | M            | 3            | 56            | 254          |

|     |   |   |     |     |
|-----|---|---|-----|-----|
| 438 | M | 3 | 7   | 230 |
| 438 | M | 3 | 50  | 8   |
| 438 | M | 3 | 94  | 5   |
| 438 | M | 3 | 32  | 3   |
| 438 | M | 3 | 20  | 2   |
| 438 | M | 3 | 6   | 1   |
| 438 | M | 3 | 75  | 1   |
| 438 | M | 3 | 13  | 1   |
| 438 | M | 3 | 4   | 1   |
| 442 | W | 1 | 414 | 507 |
| 449 | S | 2 | 9   | 385 |
| 449 | S | 2 | 12  | 39  |
| 449 | S | 2 | 38  | 30  |
| 449 | S | 2 | 2   | 3   |
| 449 | S | 2 | 96  | 1   |
| 449 | S | 2 | 25  | 1   |
| 467 | W | 2 | 3   | 429 |
| 467 | W | 2 | 6   | 39  |
| 467 | W | 2 | 32  | 25  |
| 467 | M | 2 | 3   | 2   |
| 467 | W | 2 | 90  | 1   |
| 467 | W | 2 | 19  | 1   |
| 480 | M | 3 | 6   | 17  |
| 480 | S | 3 | 42  | 9   |
| 480 | M | 3 | 42  | 7   |
| 480 | S | 3 | 36  | 6   |
| 480 | M | 3 | 24  | 2   |
| 480 | M | 3 | 4   | 1   |
| 565 | M | 1 | 373 | 36  |
| 567 | S | 3 | 13  | 18  |
| 567 | S | 3 | 7   | 9   |
| 605 | M | 2 | 12  | 290 |
| 605 | M | 2 | 31  | 115 |
| 605 | M | 2 | 44  | 64  |
| 605 | M | 2 | 24  | 13  |
| 605 | M | 2 | 25  | 4   |
| 605 | M | 2 | 59  | 3   |
| 605 | M | 2 | 11  | 1   |
| 605 | M | 2 | 38  | 1   |
| 614 | M | 2 | 9   | 307 |
| 614 | M | 2 | 28  | 115 |
| 614 | M | 2 | 41  | 56  |
| 614 | M | 2 | 21  | 13  |

|     |   |   |     |     |
|-----|---|---|-----|-----|
| 614 | M | 2 | 22  | 4   |
| 614 | M | 2 | 56  | 3   |
| 614 | M | 2 | 8   | 1   |
| 614 | M | 2 | 35  | 1   |
| 701 | M | 2 | 27  | 403 |
| 701 | M | 2 | 12  | 76  |
| 701 | M | 2 | 6   | 15  |
| 701 | M | 2 | 13  | 2   |
| 736 | S | 1 | 316 | 320 |
| 736 | M | 1 | 316 | 2   |
| 773 | S | 2 | 3   | 391 |
| 773 | S | 2 | 4   | 2   |
| 854 | M | 2 | 34  | 401 |
| 854 | M | 2 | 13  | 12  |
| 854 | S | 2 | 13  | 9   |
| 854 | W | 2 | 34  | 7   |
| 854 | S | 2 | 34  | 3   |
| 854 | M | 2 | 24  | 1   |
| 870 | M | 3 | 88  | 91  |
| 870 | M | 3 | 103 | 82  |
| 870 | M | 3 | 118 | 76  |
| 870 | M | 3 | 8   | 56  |
| 870 | W | 3 | 8   | 52  |
| 870 | M | 3 | 10  | 52  |
| 870 | W | 3 | 26  | 44  |
| 870 | M | 3 | 113 | 12  |
| 870 | W | 3 | 30  | 9   |
| 870 | M | 3 | 95  | 6   |
| 870 | W | 3 | 86  | 6   |
| 870 | W | 3 | 103 | 6   |
| 870 | M | 3 | 30  | 4   |
| 870 | W | 3 | 44  | 3   |
| 870 | M | 3 | 19  | 2   |
| 870 | M | 3 | 100 | 2   |
| 870 | W | 3 | 74  | 1   |
| 870 | W | 3 | 19  | 1   |
| 942 | W | 3 | 94  | 216 |
| 942 | W | 3 | 64  | 96  |
| 942 | W | 3 | 79  | 59  |
| 942 | W | 3 | 2   | 43  |
| 942 | W | 3 | 6   | 15  |
| 942 | W | 3 | 89  | 14  |
| 942 | W | 3 | 97  | 8   |

|      |   |   |     |     |
|------|---|---|-----|-----|
| 942  | W | 3 | 71  | 6   |
| 942  | W | 3 | 62  | 6   |
| 942  | W | 3 | 20  | 3   |
| 942  | W | 3 | 76  | 2   |
| 942  | W | 3 | 50  | 1   |
| 973  | W | 1 | 237 | 61  |
| 988  | M | 1 | 232 | 509 |
| 995  | M | 2 | 14  | 431 |
| 995  | M | 2 | 4   | 22  |
| 995  | M | 2 | 18  | 8   |
| 1009 | M | 1 | 225 | 46  |
| 1009 | W | 1 | 225 | 1   |
| 1055 | S | 2 | 6   | 474 |
| 1055 | S | 2 | 40  | 10  |
| 1055 | S | 2 | 33  | 8   |
| 1055 | S | 2 | 22  | 1   |
| 1055 | S | 2 | 5   | 1   |
| 1059 | M | 3 | 55  | 222 |
| 1059 | M | 3 | 25  | 96  |
| 1059 | M | 3 | 40  | 93  |
| 1059 | M | 3 | 23  | 30  |
| 1059 | M | 3 | 32  | 19  |
| 1059 | M | 3 | 50  | 14  |
| 1059 | M | 3 | 58  | 8   |
| 1059 | M | 3 | 43  | 4   |
| 1059 | M | 3 | 37  | 2   |
| 1059 | M | 3 | 11  | 1   |
| 1069 | S | 1 | 205 | 504 |
| 1069 | M | 1 | 205 | 1   |
| 1076 | M | 2 | 26  | 429 |
| 1076 | M | 2 | 33  | 53  |
| 1076 | M | 2 | 29  | 7   |
| 1076 | M | 2 | 47  | 3   |
| 1076 | M | 2 | 15  | 1   |
| 1085 | S | 2 | 23  | 430 |
| 1085 | S | 2 | 30  | 51  |
| 1085 | S | 2 | 26  | 7   |
| 1085 | S | 2 | 44  | 3   |
| 1085 | S | 2 | 10  | 3   |
| 1085 | S | 2 | 12  | 1   |
| 1103 | M | 2 | 17  | 429 |
| 1103 | M | 2 | 24  | 34  |
| 1103 | M | 2 | 20  | 7   |



|      |   |   |     |     |
|------|---|---|-----|-----|
| 1103 | M | 2 | 38  | 3   |
| 1103 | M | 2 | 4   | 3   |
| 1103 | M | 2 | 6   | 1   |
| 1324 | S | 1 | 120 | 509 |
| 1348 | S | 1 | 112 | 459 |
| 1348 | M | 1 | 112 | 48  |
| 1363 | M | 1 | 107 | 509 |
| 1376 | W | 2 | 3   | 486 |
| 1406 | M | 2 | 39  | 441 |
| 1406 | M | 2 | 23  | 67  |
| 1418 | S | 2 | 35  | 427 |
| 1418 | S | 2 | 19  | 9   |
| 1428 | M | 3 | 2   | 62  |
| 1445 | M | 2 | 10  | 46  |
| 1445 | M | 2 | 26  | 1   |
| 1449 | W | 3 | 14  | 210 |
| 1449 | W | 3 | 2   | 203 |
| 1449 | W | 3 | 3   | 15  |
| 1449 | W | 3 | 19  | 2   |
| 1449 | W | 3 | 11  | 1   |
| 1454 | M | 2 | 23  | 121 |
| 1454 | M | 2 | 7   | 52  |
| 1461 | W | 3 | 10  | 51  |
| 1461 | W | 3 | 5   | 3   |
| 1461 | W | 3 | 35  | 1   |
| 1465 | M | 1 | 73  | 509 |
| 1490 | W | 2 | 11  | 497 |
| 1571 | M | 2 | 26  | 417 |
| 1571 | M | 2 | 18  | 2   |
| 1571 | M | 2 | 15  | 2   |
| 1571 | M | 2 | 17  | 1   |
| 1581 | S | 3 | 2   | 42  |
| 1627 | S | 1 | 19  | 508 |
| 1663 | M | 1 | 7   | 508 |

**Table S21. Length and count data for influenza A putative ORFs accompanying Figure S19 (H11).**

| <b>Position</b> | <b>Kozak</b> | <b>Frame</b> | <b>Length</b> | <b>Count</b> |
|-----------------|--------------|--------------|---------------|--------------|
| 1               | W            | 1            | 565           | 382          |
| 50              | W            | 2            | 7             | 141          |
| 50              | W            | 2            | 4             | 1            |
| 116             | M            | 2            | 27            | 225          |
| 116             | M            | 2            | 3             | 67           |
| 116             | M            | 2            | 9             | 21           |
| 116             | M            | 2            | 21            | 3            |
| 152             | M            | 2            | 15            | 272          |
| 152             | S            | 2            | 15            | 7            |
| 152             | M            | 2            | 9             | 3            |
| 182             | M            | 2            | 5             | 224          |
| 225             | M            | 3            | 8             | 131          |
| 225             | S            | 3            | 8             | 5            |
| 244             | W            | 1            | 484           | 365          |
| 251             | M            | 2            | 2             | 365          |
| 251             | S            | 2            | 2             | 5            |
| 273             | S            | 3            | 22            | 160          |
| 273             | M            | 3            | 22            | 84           |
| 273             | S            | 3            | 18            | 49           |
| 273             | S            | 3            | 11            | 46           |
| 273             | S            | 3            | 5             | 18           |
| 273             | M            | 3            | 8             | 13           |
| 273             | S            | 3            | 30            | 2            |
| 273             | M            | 3            | 21            | 1            |
| 308             | M            | 2            | 8             | 252          |
| 308             | M            | 2            | 14            | 13           |
| 315             | M            | 3            | 8             | 201          |
| 315             | W            | 3            | 8             | 5            |
| 315             | M            | 3            | 16            | 2            |
| 315             | M            | 3            | 4             | 1            |
| 338             | M            | 2            | 4             | 342          |
| 407             | M            | 2            | 5             | 292          |
| 407             | W            | 2            | 5             | 2            |
| 407             | M            | 2            | 30            | 1            |
| 411             | M            | 3            | 19            | 262          |
| 411             | M            | 3            | 94            | 39           |
| 411             | M            | 3            | 14            | 21           |
| 411             | M            | 3            | 43            | 11           |
| 411             | M            | 3            | 7             | 8            |

|     |   |   |     |     |
|-----|---|---|-----|-----|
| 411 | M | 3 | 90  | 3   |
| 411 | M | 3 | 44  | 3   |
| 411 | M | 3 | 10  | 3   |
| 411 | M | 3 | 18  | 1   |
| 411 | M | 3 | 6   | 1   |
| 411 | M | 3 | 4   | 1   |
| 411 | M | 3 | 84  | 1   |
| 411 | M | 3 | 46  | 1   |
| 428 | S | 2 | 23  | 45  |
| 450 | W | 3 | 81  | 39  |
| 450 | W | 3 | 30  | 11  |
| 450 | W | 3 | 6   | 8   |
| 450 | W | 3 | 31  | 3   |
| 450 | W | 3 | 71  | 1   |
| 450 | W | 3 | 33  | 1   |
| 458 | S | 2 | 13  | 103 |
| 487 | S | 1 | 403 | 245 |
| 487 | M | 1 | 403 | 120 |
| 487 | W | 1 | 403 | 16  |
| 492 | S | 3 | 63  | 117 |
| 492 | S | 3 | 17  | 106 |
| 492 | S | 3 | 67  | 49  |
| 492 | S | 3 | 57  | 37  |
| 492 | S | 3 | 16  | 23  |
| 492 | S | 3 | 4   | 15  |
| 492 | S | 3 | 43  | 6   |
| 492 | S | 3 | 37  | 4   |
| 492 | S | 3 | 46  | 2   |
| 492 | S | 3 | 58  | 2   |
| 492 | S | 3 | 69  | 1   |
| 492 | S | 3 | 54  | 1   |
| 492 | S | 3 | 19  | 1   |
| 560 | M | 2 | 2   | 320 |
| 560 | M | 2 | 13  | 34  |
| 560 | W | 2 | 2   | 16  |
| 560 | M | 2 | 27  | 4   |
| 560 | S | 2 | 2   | 1   |
| 560 | M | 2 | 55  | 1   |
| 568 | M | 1 | 376 | 263 |
| 568 | W | 1 | 376 | 1   |
| 573 | S | 3 | 36  | 228 |
| 573 | S | 3 | 30  | 19  |
| 573 | S | 3 | 31  | 4   |

|      |   |   |     |     |
|------|---|---|-----|-----|
| 573  | S | 3 | 10  | 2   |
| 573  | S | 3 | 19  | 2   |
| 573  | M | 3 | 10  | 2   |
| 573  | S | 3 | 16  | 1   |
| 573  | S | 3 | 42  | 1   |
| 573  | S | 3 | 27  | 1   |
| 707  | M | 2 | 6   | 364 |
| 707  | W | 2 | 6   | 1   |
| 724  | M | 1 | 324 | 296 |
| 724  | W | 1 | 324 | 86  |
| 779  | M | 2 | 12  | 193 |
| 779  | M | 2 | 25  | 142 |
| 779  | M | 2 | 4   | 18  |
| 779  | M | 2 | 15  | 5   |
| 779  | M | 2 | 41  | 2   |
| 803  | M | 2 | 17  | 179 |
| 803  | M | 2 | 4   | 178 |
| 803  | M | 2 | 33  | 2   |
| 830  | S | 2 | 8   | 259 |
| 867  | M | 3 | 12  | 70  |
| 867  | M | 3 | 22  | 23  |
| 867  | M | 3 | 3   | 2   |
| 867  | M | 3 | 79  | 1   |
| 879  | W | 3 | 10  | 237 |
| 879  | W | 3 | 8   | 68  |
| 879  | W | 3 | 3   | 42  |
| 879  | W | 3 | 18  | 23  |
| 879  | M | 3 | 8   | 2   |
| 879  | W | 3 | 11  | 2   |
| 879  | W | 3 | 75  | 1   |
| 926  | M | 2 | 6   | 241 |
| 926  | M | 2 | 13  | 38  |
| 968  | W | 2 | 4   | 373 |
| 968  | W | 2 | 25  | 2   |
| 1004 | M | 2 | 4   | 193 |
| 1004 | M | 2 | 13  | 136 |
| 1065 | M | 3 | 15  | 68  |
| 1065 | M | 3 | 13  | 26  |
| 1065 | S | 3 | 5   | 16  |
| 1065 | M | 3 | 5   | 8   |
| 1065 | S | 3 | 40  | 7   |
| 1065 | S | 3 | 15  | 1   |
| 1082 | M | 2 | 26  | 290 |

|      |   |   |     |     |
|------|---|---|-----|-----|
| 1082 | M | 2 | 15  | 80  |
| 1086 | M | 3 | 8   | 45  |
| 1086 | M | 3 | 6   | 28  |
| 1086 | M | 3 | 17  | 14  |
| 1086 | M | 3 | 33  | 7   |
| 1091 | S | 2 | 23  | 293 |
| 1091 | S | 2 | 12  | 22  |
| 1109 | M | 2 | 17  | 283 |
| 1109 | M | 2 | 6   | 75  |
| 1201 | W | 1 | 165 | 285 |
| 1201 | M | 1 | 165 | 97  |
| 1229 | M | 2 | 9   | 275 |
| 1229 | M | 2 | 5   | 17  |
| 1229 | S | 2 | 9   | 3   |
| 1229 | M | 2 | 40  | 1   |
| 1229 | M | 2 | 16  | 1   |
| 1274 | M | 2 | 25  | 180 |
| 1274 | W | 2 | 25  | 78  |
| 1274 | M | 2 | 5   | 16  |
| 1274 | M | 2 | 19  | 15  |
| 1274 | M | 2 | 43  | 3   |
| 1274 | M | 2 | 6   | 1   |
| 1280 | W | 2 | 23  | 258 |
| 1280 | W | 2 | 41  | 54  |
| 1280 | W | 2 | 17  | 16  |
| 1280 | W | 2 | 14  | 14  |
| 1280 | W | 2 | 3   | 8   |
| 1280 | W | 2 | 4   | 6   |
| 1280 | W | 2 | 30  | 1   |
| 1299 | M | 3 | 13  | 279 |
| 1299 | M | 3 | 3   | 6   |
| 1299 | M | 3 | 20  | 1   |
| 1310 | M | 2 | 31  | 52  |
| 1310 | M | 2 | 13  | 40  |
| 1310 | M | 2 | 4   | 32  |
| 1310 | M | 2 | 7   | 8   |
| 1310 | M | 2 | 20  | 1   |
| 1337 | M | 2 | 4   | 286 |
| 1337 | M | 2 | 22  | 80  |
| 1337 | M | 2 | 11  | 15  |
| 1358 | W | 2 | 15  | 282 |
| 1358 | W | 2 | 57  | 18  |
| 1358 | W | 2 | 4   | 16  |

|      |   |   |    |     |
|------|---|---|----|-----|
| 1358 | W | 2 | 11 | 1   |
| 1367 | W | 2 | 12 | 344 |
| 1367 | W | 2 | 54 | 18  |
| 1367 | W | 2 | 8  | 1   |
| 1382 | W | 2 | 7  | 360 |
| 1382 | W | 2 | 49 | 18  |
| 1382 | W | 2 | 3  | 1   |
| 1399 | W | 1 | 99 | 284 |
| 1399 | M | 1 | 99 | 96  |
| 1412 | M | 2 | 39 | 275 |
| 1412 | M | 2 | 47 | 85  |
| 1412 | M | 2 | 23 | 1   |
| 1412 | M | 2 | 49 | 1   |
| 1421 | M | 2 | 36 | 282 |
| 1421 | M | 2 | 44 | 48  |
| 1421 | M | 2 | 20 | 1   |
| 1421 | M | 2 | 46 | 1   |
| 1430 | S | 2 | 33 | 283 |
| 1430 | S | 2 | 41 | 13  |
| 1430 | S | 2 | 43 | 1   |
| 1434 | W | 3 | 6  | 84  |
| 1434 | W | 3 | 8  | 9   |
| 1463 | M | 2 | 22 | 250 |
| 1463 | M | 2 | 30 | 44  |
| 1463 | S | 2 | 22 | 2   |
| 1463 | M | 2 | 6  | 1   |
| 1467 | W | 3 | 2  | 200 |
| 1467 | W | 3 | 5  | 47  |
| 1467 | W | 3 | 10 | 5   |
| 1487 | S | 2 | 14 | 283 |
| 1487 | S | 2 | 22 | 19  |
| 1496 | W | 2 | 11 | 290 |
| 1496 | W | 2 | 19 | 76  |
| 1496 | W | 2 | 21 | 1   |
| 1574 | M | 2 | 17 | 13  |
| 1574 | M | 2 | 22 | 8   |
| 1574 | M | 2 | 21 | 3   |
| 1639 | S | 1 | 19 | 371 |
| 1653 | M | 3 | 3  | 9   |
| 1653 | M | 3 | 8  | 7   |
| 1653 | M | 3 | 4  | 3   |

**Table S22. Length and count data for influenza A putative ORFs accompanying Figure S20 (H12).**

| <b>Position</b> | <b>Kozak</b> | <b>Frame</b> | <b>Length</b> | <b>Count</b> |
|-----------------|--------------|--------------|---------------|--------------|
| 1               | W            | 1            | 564           | 124          |
| 50              | W            | 2            | 16            | 120          |
| 119             | M            | 2            | 3             | 21           |
| 119             | M            | 2            | 27            | 12           |
| 119             | M            | 2            | 6             | 3            |
| 119             | M            | 2            | 23            | 2            |
| 152             | M            | 2            | 12            | 98           |
| 152             | M            | 2            | 16            | 16           |
| 152             | M            | 2            | 3             | 7            |
| 174             | W            | 3            | 11            | 61           |
| 174             | W            | 3            | 12            | 8            |
| 174             | W            | 3            | 32            | 6            |
| 174             | W            | 3            | 22            | 5            |
| 174             | W            | 3            | 3             | 2            |
| 174             | W            | 3            | 93            | 1            |
| 174             | M            | 3            | 22            | 1            |
| 209             | W            | 2            | 4             | 98           |
| 209             | W            | 2            | 9             | 6            |
| 209             | W            | 2            | 7             | 2            |
| 249             | W            | 3            | 7             | 15           |
| 249             | W            | 3            | 42            | 2            |
| 249             | W            | 3            | 68            | 1            |
| 266             | M            | 2            | 7             | 97           |
| 266             | M            | 2            | 23            | 13           |
| 266             | M            | 2            | 8             | 4            |
| 266             | M            | 2            | 14            | 1            |
| 276             | S            | 3            | 20            | 95           |
| 276             | S            | 3            | 36            | 3            |
| 276             | S            | 3            | 42            | 1            |
| 276             | S            | 3            | 11            | 1            |
| 276             | S            | 3            | 8             | 1            |
| 307             | S            | 1            | 462           | 121          |
| 383             | M            | 2            | 3             | 89           |
| 397             | M            | 1            | 432           | 124          |
| 414             | M            | 3            | 13            | 71           |
| 414             | M            | 3            | 9             | 9            |
| 414             | M            | 3            | 22            | 6            |
| 414             | S            | 3            | 13            | 1            |
| 414             | M            | 3            | 8             | 1            |

|      |   |   |     |     |
|------|---|---|-----|-----|
| 419  | M | 2 | 23  | 119 |
| 419  | M | 2 | 28  | 2   |
| 447  | M | 3 | 2   | 12  |
| 452  | M | 2 | 12  | 43  |
| 487  | M | 1 | 402 | 121 |
| 492  | S | 3 | 14  | 113 |
| 492  | S | 3 | 13  | 2   |
| 492  | M | 3 | 14  | 2   |
| 492  | S | 3 | 36  | 1   |
| 533  | W | 2 | 26  | 92  |
| 533  | W | 2 | 51  | 30  |
| 533  | W | 2 | 57  | 1   |
| 573  | M | 3 | 9   | 31  |
| 602  | W | 2 | 3   | 75  |
| 602  | W | 2 | 28  | 28  |
| 602  | W | 2 | 34  | 1   |
| 656  | W | 2 | 10  | 79  |
| 656  | W | 2 | 16  | 42  |
| 724  | S | 1 | 323 | 124 |
| 779  | M | 2 | 11  | 105 |
| 779  | M | 2 | 3   | 17  |
| 803  | S | 2 | 3   | 124 |
| 830  | M | 2 | 10  | 98  |
| 830  | M | 2 | 14  | 9   |
| 830  | M | 2 | 19  | 1   |
| 830  | M | 2 | 2   | 1   |
| 867  | M | 3 | 3   | 54  |
| 867  | W | 3 | 8   | 16  |
| 879  | W | 3 | 4   | 38  |
| 879  | W | 3 | 17  | 5   |
| 879  | W | 3 | 26  | 2   |
| 890  | W | 2 | 3   | 70  |
| 901  | M | 1 | 264 | 123 |
| 951  | M | 3 | 88  | 34  |
| 951  | M | 3 | 81  | 33  |
| 951  | M | 3 | 78  | 29  |
| 951  | M | 3 | 2   | 15  |
| 951  | M | 3 | 85  | 4   |
| 951  | M | 3 | 82  | 3   |
| 951  | M | 3 | 54  | 2   |
| 951  | M | 3 | 93  | 2   |
| 1004 | M | 2 | 17  | 117 |
| 1004 | M | 2 | 13  | 1   |



|      |   |   |     |     |
|------|---|---|-----|-----|
| 1065 | M | 3 | 50  | 34  |
| 1065 | M | 3 | 40  | 30  |
| 1065 | M | 3 | 43  | 23  |
| 1065 | S | 3 | 43  | 6   |
| 1065 | M | 3 | 47  | 4   |
| 1065 | M | 3 | 44  | 3   |
| 1065 | S | 3 | 40  | 2   |
| 1065 | M | 3 | 55  | 2   |
| 1065 | S | 3 | 16  | 2   |
| 1091 | S | 2 | 12  | 79  |
| 1091 | S | 2 | 23  | 37  |
| 1091 | S | 2 | 30  | 3   |
| 1109 | M | 2 | 6   | 83  |
| 1109 | M | 2 | 17  | 21  |
| 1109 | M | 2 | 4   | 1   |
| 1126 | S | 1 | 189 | 22  |
| 1168 | M | 1 | 175 | 124 |
| 1187 | M | 2 | 5   | 114 |
| 1187 | M | 2 | 12  | 1   |
| 1201 | M | 1 | 164 | 124 |
| 1229 | M | 2 | 9   | 102 |
| 1229 | M | 2 | 5   | 3   |
| 1261 | M | 1 | 144 | 121 |
| 1280 | W | 2 | 3   | 105 |
| 1299 | M | 3 | 5   | 63  |
| 1299 | M | 3 | 18  | 43  |
| 1299 | M | 3 | 3   | 17  |
| 1299 | M | 3 | 28  | 1   |
| 1310 | M | 2 | 13  | 88  |
| 1310 | M | 2 | 20  | 15  |
| 1310 | M | 2 | 4   | 3   |
| 1310 | M | 2 | 3   | 1   |
| 1352 | W | 2 | 6   | 89  |
| 1352 | W | 2 | 17  | 12  |
| 1358 | M | 2 | 4   | 94  |
| 1358 | M | 2 | 15  | 13  |
| 1361 | M | 2 | 3   | 33  |
| 1361 | M | 2 | 14  | 18  |
| 1367 | W | 2 | 12  | 30  |
| 1382 | W | 2 | 7   | 99  |
| 1412 | M | 2 | 47  | 70  |
| 1412 | M | 2 | 58  | 34  |
| 1412 | M | 2 | 2   | 18  |

|      |   |   |    |     |
|------|---|---|----|-----|
| 1412 | M | 2 | 20 | 1   |
| 1412 | M | 2 | 44 | 1   |
| 1430 | S | 2 | 41 | 74  |
| 1430 | S | 2 | 52 | 33  |
| 1430 | S | 2 | 33 | 5   |
| 1430 | S | 2 | 14 | 2   |
| 1430 | S | 2 | 38 | 1   |
| 1434 | W | 3 | 2  | 11  |
| 1460 | M | 2 | 31 | 18  |
| 1460 | M | 2 | 23 | 5   |
| 1460 | M | 2 | 4  | 1   |
| 1463 | S | 2 | 30 | 7   |
| 1463 | S | 2 | 22 | 5   |
| 1463 | M | 2 | 30 | 2   |
| 1463 | S | 2 | 3  | 1   |
| 1467 | W | 3 | 21 | 7   |
| 1467 | W | 3 | 19 | 6   |
| 1467 | W | 3 | 5  | 3   |
| 1467 | W | 3 | 15 | 2   |
| 1471 | M | 1 | 74 | 122 |
| 1471 | W | 1 | 74 | 2   |
| 1487 | S | 2 | 33 | 34  |
| 1511 | M | 2 | 14 | 73  |
| 1511 | M | 2 | 25 | 34  |
| 1511 | M | 2 | 11 | 1   |
| 1547 | M | 2 | 2  | 85  |
| 1547 | M | 2 | 13 | 34  |
| 1630 | W | 1 | 21 | 124 |

**Table S23. Length and count data for influenza A putative ORFs accompanying Figure S21 (H13).**

| <b>Position</b> | <b>Kozak</b> | <b>Frame</b> | <b>Length</b> | <b>Count</b> |
|-----------------|--------------|--------------|---------------|--------------|
| 1               | W            | 1            | 566           | 38           |
| 11              | W            | 2            | 5             | 21           |
| 11              | W            | 2            | 8             | 1            |
| 42              | W            | 3            | 24            | 8            |
| 42              | W            | 3            | 34            | 1            |
| 42              | W            | 3            | 20            | 1            |
| 50              | W            | 2            | 9             | 5            |
| 63              | M            | 3            | 17            | 21           |
| 63              | M            | 3            | 27            | 1            |
| 119             | S            | 2            | 10            | 17           |
| 119             | M            | 2            | 10            | 12           |
| 119             | S            | 2            | 4             | 6            |
| 122             | M            | 2            | 9             | 15           |
| 188             | M            | 2            | 16            | 15           |
| 188             | M            | 2            | 7             | 13           |
| 188             | M            | 2            | 17            | 9            |
| 188             | M            | 2            | 34            | 1            |
| 231             | S            | 3            | 21            | 21           |
| 231             | S            | 3            | 14            | 1            |
| 252             | M            | 3            | 14            | 9            |
| 252             | M            | 3            | 7             | 1            |
| 252             | W            | 3            | 14            | 1            |
| 279             | S            | 3            | 5             | 7            |
| 314             | M            | 2            | 8             | 22           |
| 314             | M            | 2            | 14            | 16           |
| 341             | W            | 2            | 5             | 7            |
| 347             | S            | 2            | 18            | 22           |
| 347             | S            | 2            | 3             | 14           |
| 431             | W            | 2            | 20            | 14           |
| 431             | W            | 2            | 24            | 1            |
| 434             | S            | 2            | 19            | 14           |
| 434             | M            | 2            | 19            | 1            |
| 434             | S            | 2            | 23            | 1            |
| 454             | M            | 1            | 415           | 3            |
| 458             | M            | 2            | 11            | 17           |
| 495             | S            | 3            | 6             | 9            |
| 563             | M            | 2            | 2             | 37           |
| 563             | M            | 2            | 55            | 1            |
| 574             | M            | 1            | 375           | 3            |

|      |   |   |     |    |
|------|---|---|-----|----|
| 576  | M | 3 | 18  | 17 |
| 576  | M | 3 | 10  | 5  |
| 605  | W | 2 | 26  | 5  |
| 623  | W | 2 | 8   | 24 |
| 623  | W | 2 | 20  | 11 |
| 623  | W | 2 | 35  | 2  |
| 663  | S | 3 | 2   | 10 |
| 663  | S | 3 | 5   | 2  |
| 663  | M | 3 | 2   | 1  |
| 710  | S | 2 | 6   | 38 |
| 727  | W | 1 | 324 | 38 |
| 748  | W | 1 | 317 | 16 |
| 763  | M | 1 | 312 | 22 |
| 782  | S | 2 | 11  | 18 |
| 782  | S | 2 | 4   | 10 |
| 806  | S | 2 | 3   | 37 |
| 827  | S | 2 | 10  | 17 |
| 827  | S | 2 | 26  | 13 |
| 827  | S | 2 | 23  | 8  |
| 862  | M | 1 | 279 | 16 |
| 870  | W | 3 | 38  | 7  |
| 870  | W | 3 | 44  | 1  |
| 870  | W | 3 | 30  | 1  |
| 882  | W | 3 | 26  | 8  |
| 882  | W | 3 | 34  | 7  |
| 882  | W | 3 | 40  | 1  |
| 941  | M | 2 | 9   | 21 |
| 941  | M | 2 | 2   | 17 |
| 1007 | M | 2 | 17  | 37 |
| 1007 | M | 2 | 24  | 1  |
| 1085 | M | 2 | 15  | 23 |
| 1085 | M | 2 | 29  | 15 |
| 1094 | S | 2 | 26  | 8  |
| 1112 | M | 2 | 20  | 8  |
| 1112 | M | 2 | 6   | 7  |
| 1204 | M | 1 | 165 | 38 |
| 1208 | M | 2 | 17  | 23 |
| 1208 | M | 2 | 13  | 2  |
| 1217 | M | 2 | 14  | 23 |
| 1217 | M | 2 | 10  | 8  |
| 1217 | M | 2 | 3   | 7  |
| 1264 | M | 1 | 145 | 38 |
| 1283 | W | 2 | 3   | 30 |

|      |   |   |     |    |
|------|---|---|-----|----|
| 1286 | M | 2 | 2   | 31 |
| 1298 | W | 2 | 18  | 15 |
| 1298 | W | 2 | 12  | 1  |
| 1313 | M | 2 | 13  | 24 |
| 1313 | M | 2 | 7   | 14 |
| 1340 | M | 2 | 4   | 37 |
| 1357 | M | 1 | 114 | 37 |
| 1361 | W | 2 | 4   | 22 |
| 1361 | W | 2 | 15  | 16 |
| 1364 | M | 2 | 3   | 22 |
| 1364 | M | 2 | 14  | 10 |
| 1370 | W | 2 | 12  | 16 |
| 1385 | W | 2 | 7   | 38 |
| 1415 | M | 2 | 2   | 13 |
| 1415 | M | 2 | 23  | 9  |
| 1415 | W | 2 | 2   | 8  |
| 1415 | W | 2 | 23  | 8  |
| 1424 | W | 2 | 20  | 16 |
| 1433 | S | 2 | 17  | 37 |
| 1437 | W | 3 | 2   | 2  |
| 1458 | W | 3 | 2   | 22 |
| 1463 | M | 2 | 7   | 37 |
| 1474 | M | 1 | 75  | 38 |
| 1490 | S | 2 | 14  | 30 |
| 1499 | W | 2 | 11  | 11 |
| 1505 | M | 2 | 9   | 14 |
| 1514 | M | 2 | 6   | 38 |
| 1550 | M | 2 | 2   | 13 |
| 1550 | M | 2 | 26  | 9  |
| 1577 | M | 2 | 17  | 23 |
| 1577 | M | 2 | 18  | 1  |
| 1654 | M | 1 | 15  | 38 |

**Table S24. Length and count data for influenza A putative ORFs accompanying Figure S22 (H14).**

| <b>Position</b> | <b>Kozak</b> | <b>Frame</b> | <b>Length</b> | <b>Count</b> |
|-----------------|--------------|--------------|---------------|--------------|
| 1               | W            | 1            | 568           | 11           |
| 62              | M            | 2            | 24            | 11           |
| 87              | W            | 3            | 13            | 11           |
| 101             | M            | 2            | 11            | 11           |
| 113             | S            | 2            | 7             | 5            |
| 122             | W            | 2            | 4             | 1            |
| 194             | W            | 2            | 7             | 11           |
| 201             | M            | 3            | 25            | 7            |
| 227             | M            | 2            | 80            | 7            |
| 251             | M            | 2            | 26            | 4            |
| 302             | M            | 2            | 55            | 7            |
| 302             | M            | 2            | 9             | 4            |
| 328             | S            | 1            | 459           | 7            |
| 336             | W            | 3            | 36            | 4            |
| 350             | W            | 2            | 39            | 7            |
| 431             | S            | 2            | 12            | 11           |
| 482             | S            | 2            | 6             | 6            |
| 524             | M            | 2            | 44            | 4            |
| 533             | S            | 2            | 41            | 11           |
| 545             | W            | 2            | 37            | 7            |
| 572             | W            | 2            | 28            | 5            |
| 617             | M            | 2            | 13            | 4            |
| 882             | M            | 3            | 8             | 7            |
| 882             | M            | 3            | 7             | 4            |
| 941             | M            | 2            | 6             | 11           |
| 997             | W            | 1            | 236           | 11           |
| 1012            | M            | 1            | 231           | 11           |
| 1076            | S            | 2            | 5             | 11           |
| 1097            | M            | 2            | 19            | 11           |
| 1106            | S            | 2            | 16            | 11           |
| 1124            | M            | 2            | 10            | 11           |
| 1187            | M            | 2            | 3             | 11           |
| 1220            | W            | 2            | 42            | 5            |
| 1220            | W            | 2            | 6             | 4            |
| 1220            | W            | 2            | 13            | 2            |
| 1325            | M            | 2            | 7             | 5            |
| 1325            | M            | 2            | 4             | 4            |
| 1325            | M            | 2            | 13            | 2            |
| 1367            | W            | 2            | 6             | 11           |

|      |   |   |     |    |
|------|---|---|-----|----|
| 1384 | M | 1 | 107 | 11 |
| 1427 | M | 2 | 20  | 11 |
| 1449 | W | 3 | 8   | 5  |
| 1502 | S | 2 | 19  | 7  |
| 1511 | W | 2 | 16  | 11 |
| 1532 | M | 2 | 9   | 11 |
| 1579 | S | 1 | 42  | 11 |
| 1618 | W | 1 | 29  | 11 |
| 1623 | M | 3 | 16  | 7  |

**Table S25. Length and count data for influenza A putative ORFs accompanying Figure S23 (H15).**

| <b>Position</b> | <b>Kozak</b> | <b>Frame</b> | <b>Length</b> | <b>Count</b> |
|-----------------|--------------|--------------|---------------|--------------|
| 1               | W            | 1            | 570           | 10           |
| 43              | M            | 1            | 556           | 9            |
| 77              | M            | 2            | 2             | 9            |
| 77              | M            | 2            | 11            | 1            |
| 89              | M            | 2            | 7             | 10           |
| 137             | W            | 2            | 10            | 10           |
| 312             | W            | 3            | 7             | 1            |
| 335             | W            | 2            | 4             | 9            |
| 391             | M            | 1            | 440           | 9            |
| 391             | S            | 1            | 440           | 1            |
| 422             | M            | 2            | 2             | 1            |
| 472             | M            | 1            | 413           | 10           |
| 477             | S            | 3            | 7             | 10           |
| 493             | M            | 1            | 406           | 5            |
| 564             | M            | 3            | 20            | 1            |
| 593             | W            | 2            | 12            | 9            |
| 611             | M            | 2            | 6             | 10           |
| 698             | M            | 2            | 28            | 9            |
| 698             | M            | 2            | 13            | 1            |
| 730             | W            | 1            | 327           | 10           |
| 770             | M            | 2            | 4             | 10           |
| 815             | W            | 2            | 35            | 9            |
| 815             | W            | 2            | 56            | 1            |
| 839             | S            | 2            | 27            | 9            |
| 839             | S            | 2            | 48            | 1            |
| 866             | M            | 2            | 18            | 9            |
| 878             | W            | 2            | 14            | 9            |
| 878             | W            | 2            | 35            | 1            |
| 897             | M            | 3            | 18            | 9            |
| 897             | M            | 3            | 8             | 1            |
| 969             | M            | 3            | 44            | 1            |
| 1015            | M            | 1            | 232           | 10           |
| 1022            | M            | 2            | 56            | 9            |
| 1022            | M            | 2            | 14            | 1            |
| 1082            | S            | 2            | 36            | 10           |
| 1086            | M            | 3            | 5             | 10           |
| 1103            | M            | 2            | 29            | 10           |
| 1107            | M            | 3            | 4             | 10           |
| 1112            | S            | 2            | 26            | 9            |



|      |   |   |     |    |
|------|---|---|-----|----|
| 1130 | M | 2 | 20  | 10 |
| 1250 | M | 2 | 9   | 10 |
| 1283 | M | 2 | 2   | 1  |
| 1331 | M | 2 | 4   | 9  |
| 1331 | M | 2 | 5   | 1  |
| 1351 | S | 1 | 120 | 10 |
| 1390 | M | 1 | 107 | 10 |
| 1403 | W | 2 | 3   | 10 |
| 1433 | M | 2 | 42  | 10 |
| 1445 | S | 2 | 38  | 10 |
| 1455 | W | 3 | 2   | 10 |
| 1488 | W | 3 | 7   | 9  |
| 1488 | W | 3 | 13  | 1  |
| 1492 | M | 1 | 73  | 10 |
| 1561 | M | 1 | 50  | 10 |
| 1608 | S | 3 | 2   | 10 |
| 1636 | M | 1 | 25  | 9  |
| 1636 | W | 1 | 25  | 1  |
| 1654 | S | 1 | 19  | 10 |
| 1669 | W | 1 | 14  | 10 |

**Table S26. Length and count data for influenza A putative ORFs accompanying Figure S24 (H16).**

| <b>Position</b> | <b>Kozak</b> | <b>Frame</b> | <b>Length</b> | <b>Count</b> |
|-----------------|--------------|--------------|---------------|--------------|
| 1               | W            | 1            | 565           | 31           |
| 4               | S            | 1            | 564           | 9            |
| 4               | M            | 1            | 564           | 6            |
| 66              | M            | 3            | 7             | 30           |
| 66              | M            | 3            | 11            | 1            |
| 122             | S            | 2            | 4             | 21           |
| 191             | M            | 2            | 17            | 21           |
| 191             | M            | 2            | 34            | 3            |
| 234             | S            | 3            | 21            | 11           |
| 234             | S            | 3            | 24            | 11           |
| 234             | S            | 3            | 27            | 1            |
| 282             | S            | 3            | 5             | 2            |
| 282             | S            | 3            | 8             | 1            |
| 308             | W            | 2            | 24            | 22           |
| 308             | W            | 2            | 11            | 2            |
| 350             | S            | 2            | 10            | 31           |
| 420             | M            | 3            | 13            | 15           |
| 420             | M            | 3            | 14            | 7            |
| 420             | M            | 3            | 31            | 5            |
| 428             | M            | 2            | 5             | 18           |
| 428             | M            | 2            | 25            | 3            |
| 428             | M            | 2            | 24            | 2            |
| 437             | M            | 2            | 2             | 26           |
| 437             | M            | 2            | 22            | 3            |
| 437             | M            | 2            | 21            | 2            |
| 453             | W            | 3            | 3             | 6            |
| 453             | W            | 3            | 20            | 5            |
| 512             | M            | 2            | 6             | 15           |
| 512             | S            | 2            | 6             | 4            |
| 512             | S            | 2            | 5             | 2            |
| 563             | M            | 2            | 2             | 17           |
| 563             | M            | 2            | 28            | 8            |
| 563             | M            | 2            | 3             | 3            |
| 563             | M            | 2            | 46            | 3            |
| 623             | W            | 2            | 26            | 15           |
| 623             | W            | 2            | 8             | 14           |
| 663             | S            | 3            | 5             | 20           |
| 677             | M            | 2            | 8             | 31           |
| 707             | S            | 2            | 6             | 9            |

|      |   |   |     |    |
|------|---|---|-----|----|
| 724  | W | 1 | 324 | 31 |
| 745  | W | 1 | 317 | 31 |
| 766  | M | 1 | 310 | 11 |
| 779  | S | 2 | 4   | 29 |
| 779  | S | 2 | 25  | 2  |
| 803  | S | 2 | 17  | 4  |
| 824  | S | 2 | 10  | 4  |
| 859  | S | 1 | 279 | 29 |
| 859  | M | 1 | 279 | 1  |
| 867  | W | 3 | 50  | 13 |
| 867  | W | 3 | 51  | 10 |
| 867  | W | 3 | 14  | 2  |
| 879  | M | 3 | 47  | 10 |
| 879  | W | 3 | 46  | 1  |
| 879  | M | 3 | 46  | 1  |
| 892  | M | 1 | 268 | 15 |
| 938  | M | 2 | 9   | 31 |
| 951  | M | 3 | 22  | 3  |
| 1004 | M | 2 | 17  | 31 |
| 1019 | W | 2 | 12  | 11 |
| 1065 | S | 3 | 5   | 8  |
| 1065 | S | 3 | 33  | 8  |
| 1082 | M | 2 | 26  | 16 |
| 1086 | M | 3 | 17  | 19 |
| 1086 | M | 3 | 26  | 9  |
| 1086 | M | 3 | 8   | 3  |
| 1091 | S | 2 | 23  | 27 |
| 1109 | M | 2 | 17  | 3  |
| 1163 | W | 2 | 2   | 31 |
| 1201 | M | 1 | 165 | 31 |
| 1214 | M | 2 | 3   | 22 |
| 1214 | M | 2 | 10  | 1  |
| 1261 | M | 1 | 145 | 31 |
| 1280 | W | 2 | 3   | 31 |
| 1283 | M | 2 | 2   | 31 |
| 1295 | W | 2 | 18  | 9  |
| 1299 | M | 3 | 5   | 2  |
| 1310 | M | 2 | 6   | 18 |
| 1310 | M | 2 | 13  | 11 |
| 1310 | M | 2 | 31  | 1  |
| 1337 | M | 2 | 22  | 13 |
| 1337 | S | 2 | 4   | 11 |
| 1358 | W | 2 | 15  | 21 |

|      |   |   |    |    |
|------|---|---|----|----|
| 1358 | W | 2 | 11 | 1  |
| 1361 | M | 2 | 14 | 23 |
| 1361 | M | 2 | 10 | 1  |
| 1367 | W | 2 | 12 | 30 |
| 1367 | W | 2 | 8  | 1  |
| 1382 | W | 2 | 7  | 30 |
| 1382 | W | 2 | 3  | 1  |
| 1412 | M | 2 | 39 | 31 |
| 1421 | W | 2 | 36 | 21 |
| 1430 | S | 2 | 33 | 27 |
| 1455 | W | 3 | 2  | 2  |
| 1460 | M | 2 | 23 | 28 |
| 1467 | W | 3 | 5  | 16 |
| 1467 | W | 3 | 10 | 9  |
| 1467 | W | 3 | 12 | 6  |
| 1471 | M | 1 | 75 | 31 |
| 1487 | S | 2 | 14 | 31 |
| 1502 | M | 2 | 9  | 31 |
| 1574 | M | 2 | 16 | 21 |
| 1574 | M | 2 | 18 | 9  |
| 1624 | S | 1 | 24 | 22 |
| 1651 | M | 1 | 15 | 31 |
| 1659 | M | 3 | 2  | 3  |
| 1659 | M | 3 | 4  | 3  |
| 1659 | M | 3 | 8  | 2  |

**Table S27. Length and count data for influenza A putative ORFs accompanying Figure S25 (H17).**

| <b>Position</b> | <b>Kozak</b> | <b>Frame</b> | <b>Length</b> | <b>Count</b> |
|-----------------|--------------|--------------|---------------|--------------|
| 1               | W            | 1            | 564           | 3            |
| 63              | M            | 3            | 9             | 3            |
| 122             | M            | 2            | 10            | 3            |
| 167             | S            | 2            | 6             | 2            |
| 177             | M            | 3            | 26            | 3            |
| 188             | M            | 2            | 34            | 2            |
| 188             | M            | 2            | 12            | 1            |
| 216             | M            | 3            | 13            | 3            |
| 279             | S            | 3            | 7             | 3            |
| 299             | W            | 2            | 21            | 3            |
| 305             | M            | 2            | 19            | 1            |
| 367             | M            | 1            | 442           | 3            |
| 418             | M            | 1            | 425           | 3            |
| 440             | M            | 2            | 30            | 3            |
| 593             | M            | 2            | 56            | 3            |
| 617             | M            | 2            | 48            | 3            |
| 623             | M            | 2            | 46            | 3            |
| 695             | M            | 2            | 22            | 3            |
| 800             | S            | 2            | 13            | 3            |
| 841             | W            | 1            | 284           | 3            |
| 879             | W            | 3            | 23            | 3            |
| 982             | W            | 1            | 237           | 3            |
| 1015            | M            | 1            | 226           | 3            |
| 1075            | M            | 1            | 206           | 3            |
| 1082            | M            | 2            | 29            | 3            |
| 1091            | S            | 2            | 26            | 3            |
| 1163            | W            | 2            | 2             | 3            |
| 1201            | M            | 1            | 164           | 3            |
| 1280            | W            | 2            | 17            | 3            |
| 1283            | M            | 2            | 16            | 3            |
| 1337            | M            | 2            | 11            | 3            |
| 1358            | W            | 2            | 4             | 3            |
| 1361            | M            | 2            | 3             | 3            |
| 1412            | M            | 2            | 2             | 3            |
| 1421            | W            | 2            | 20            | 3            |
| 1430            | S            | 2            | 17            | 3            |
| 1471            | M            | 1            | 74            | 3            |
| 1487            | S            | 2            | 22            | 3            |
| 1504            | M            | 1            | 63            | 3            |

|      |   |   |    |   |
|------|---|---|----|---|
| 1547 | M | 2 | 2  | 3 |
| 1585 | M | 1 | 36 | 3 |

**Table S28. Length and count data for influenza A putative ORFs accompanying Figure S26 (H18).**

| <b>Position</b> | <b>Kozak</b> | <b>Frame</b> | <b>Length</b> | <b>Count</b> |
|-----------------|--------------|--------------|---------------|--------------|
| 1               | W            | 1            | 561           | 1            |
| 51              | M            | 3            | 7             | 1            |
| 110             | W            | 2            | 3             | 1            |
| 155             | S            | 2            | 6             | 1            |
| 219             | M            | 3            | 8             | 1            |
| 226             | M            | 1            | 486           | 1            |
| 267             | M            | 3            | 10            | 1            |
| 302             | S            | 2            | 11            | 1            |
| 397             | M            | 1            | 429           | 1            |
| 441             | W            | 3            | 3             | 1            |
| 449             | W            | 2            | 11            | 1            |
| 458             | M            | 2            | 8             | 1            |
| 584             | W            | 2            | 28            | 1            |
| 608             | S            | 2            | 20            | 1            |
| 929             | M            | 2            | 9             | 1            |
| 1056            | S            | 3            | 5             | 1            |
| 1073            | M            | 2            | 29            | 1            |
| 1082            | S            | 2            | 26            | 1            |
| 1118            | M            | 2            | 14            | 1            |
| 1154            | W            | 2            | 2             | 1            |
| 1192            | M            | 1            | 164           | 1            |
| 1240            | M            | 1            | 148           | 1            |
| 1271            | W            | 2            | 37            | 1            |
| 1274            | S            | 2            | 36            | 1            |
| 1286            | W            | 2            | 32            | 1            |
| 1301            | M            | 2            | 27            | 1            |
| 1328            | M            | 2            | 18            | 1            |
| 1349            | W            | 2            | 11            | 1            |
| 1352            | M            | 2            | 10            | 1            |
| 1358            | W            | 2            | 8             | 1            |
| 1403            | M            | 2            | 47            | 1            |
| 1414            | S            | 1            | 90            | 1            |
| 1446            | W            | 3            | 7             | 1            |
| 1458            | W            | 3            | 3             | 1            |
| 1462            | M            | 1            | 74            | 1            |
| 1466            | W            | 2            | 26            | 1            |
| 1496            | M            | 2            | 16            | 1            |
| 1576            | M            | 1            | 36            | 1            |
| 1641            | M            | 3            | 4             | 1            |

**Table S29. Length and count data for influenza A putative ORFs accompanying Figure S27 (N1).**

| <b>Position</b> | <b>Kozak</b> | <b>Frame</b> | <b>Length</b> | <b>Count</b> |
|-----------------|--------------|--------------|---------------|--------------|
| 1               | W            | 1            | 469           | 9918         |
| 43              | W            | 1            | 455           | 8274         |
| 43              | M            | 1            | 455           | 923          |
| 55              | S            | 1            | 451           | 7649         |
| 55              | M            | 1            | 451           | 22           |
| 96              | S            | 3            | 2             | 9308         |
| 96              | S            | 3            | 14            | 452          |
| 96              | M            | 3            | 2             | 46           |
| 96              | S            | 3            | 8             | 43           |
| 96              | M            | 3            | 8             | 10           |
| 96              | S            | 3            | 24            | 9            |
| 96              | M            | 3            | 17            | 6            |
| 96              | M            | 3            | 14            | 4            |
| 96              | S            | 3            | 6             | 2            |
| 96              | S            | 3            | 17            | 2            |
| 96              | S            | 3            | 26            | 1            |
| 96              | S            | 3            | 12            | 1            |
| 144             | M            | 3            | 8             | 8318         |
| 144             | M            | 3            | 19            | 457          |
| 144             | M            | 3            | 22            | 381          |
| 144             | M            | 3            | 28            | 21           |
| 144             | M            | 3            | 24            | 21           |
| 144             | M            | 3            | 55            | 20           |
| 144             | M            | 3            | 10            | 20           |
| 144             | M            | 3            | 2             | 13           |
| 144             | M            | 3            | 6             | 10           |
| 144             | M            | 3            | 39            | 7            |
| 144             | M            | 3            | 21            | 7            |
| 144             | W            | 3            | 8             | 3            |
| 144             | M            | 3            | 46            | 1            |
| 167             | W            | 2            | 6             | 8364         |
| 167             | W            | 2            | 11            | 32           |
| 167             | W            | 2            | 24            | 14           |
| 167             | M            | 2            | 6             | 14           |
| 167             | W            | 2            | 27            | 3            |
| 167             | M            | 2            | 11            | 1            |
| 180             | M            | 3            | 9             | 842          |
| 180             | M            | 3            | 15            | 36           |
| 180             | M            | 3            | 7             | 24           |



|     |   |   |    |      |
|-----|---|---|----|------|
| 180 | M | 3 | 44 | 19   |
| 180 | S | 3 | 9  | 6    |
| 180 | M | 3 | 2  | 4    |
| 180 | M | 3 | 27 | 4    |
| 180 | M | 3 | 16 | 2    |
| 180 | M | 3 | 81 | 1    |
| 180 | S | 3 | 15 | 1    |
| 180 | M | 3 | 41 | 1    |
| 180 | M | 3 | 12 | 1    |
| 180 | S | 3 | 5  | 1    |
| 180 | W | 3 | 2  | 1    |
| 197 | W | 2 | 17 | 7712 |
| 197 | W | 2 | 14 | 455  |
| 197 | W | 2 | 19 | 72   |
| 197 | W | 2 | 3  | 11   |
| 197 | W | 2 | 13 | 3    |
| 197 | W | 2 | 8  | 2    |
| 197 | W | 2 | 40 | 1    |
| 197 | M | 2 | 19 | 1    |
| 288 | M | 3 | 5  | 8014 |
| 288 | M | 3 | 7  | 453  |
| 288 | M | 3 | 8  | 310  |
| 288 | M | 3 | 45 | 132  |
| 288 | M | 3 | 14 | 38   |
| 288 | M | 3 | 4  | 23   |
| 288 | M | 3 | 33 | 12   |
| 288 | S | 3 | 45 | 1    |
| 288 | S | 3 | 8  | 1    |
| 288 | S | 3 | 5  | 1    |
| 311 | S | 2 | 2  | 526  |
| 311 | M | 2 | 2  | 1    |
| 311 | S | 2 | 4  | 1    |
| 338 | M | 2 | 4  | 8249 |
| 338 | M | 2 | 21 | 519  |
| 338 | M | 2 | 3  | 29   |
| 338 | M | 2 | 14 | 4    |
| 338 | M | 2 | 27 | 2    |
| 338 | M | 2 | 2  | 1    |
| 369 | M | 3 | 18 | 7658 |
| 369 | W | 3 | 18 | 1911 |
| 369 | W | 3 | 6  | 43   |
| 369 | W | 3 | 22 | 24   |
| 369 | W | 3 | 2  | 17   |

|     |   |   |     |      |
|-----|---|---|-----|------|
| 369 | W | 3 | 4   | 17   |
| 369 | M | 3 | 4   | 4    |
| 369 | M | 3 | 17  | 4    |
| 369 | M | 3 | 6   | 4    |
| 369 | M | 3 | 26  | 3    |
| 369 | W | 3 | 17  | 1    |
| 369 | W | 3 | 19  | 1    |
| 384 | M | 3 | 13  | 9453 |
| 384 | M | 3 | 17  | 23   |
| 384 | W | 3 | 13  | 19   |
| 384 | M | 3 | 21  | 3    |
| 384 | W | 3 | 12  | 3    |
| 384 | M | 3 | 12  | 3    |
| 384 | S | 3 | 13  | 2    |
| 384 | M | 3 | 14  | 1    |
| 384 | S | 3 | 12  | 1    |
| 422 | W | 2 | 17  | 9858 |
| 422 | W | 2 | 8   | 22   |
| 422 | W | 2 | 18  | 1    |
| 437 | M | 2 | 12  | 9600 |
| 437 | M | 2 | 3   | 22   |
| 437 | W | 2 | 12  | 5    |
| 437 | M | 2 | 13  | 1    |
| 475 | W | 1 | 311 | 9914 |
| 475 | M | 1 | 311 | 2    |
| 549 | W | 3 | 2   | 935  |
| 549 | W | 3 | 16  | 29   |
| 549 | W | 3 | 60  | 2    |
| 554 | M | 2 | 6   | 9612 |
| 554 | M | 2 | 3   | 69   |
| 554 | M | 2 | 21  | 11   |
| 554 | M | 2 | 18  | 3    |
| 557 | S | 2 | 5   | 9770 |
| 557 | S | 2 | 2   | 85   |
| 557 | S | 2 | 20  | 11   |
| 557 | S | 2 | 17  | 3    |
| 562 | S | 1 | 282 | 879  |
| 562 | M | 1 | 282 | 10   |
| 567 | S | 3 | 10  | 879  |
| 567 | S | 3 | 20  | 2    |
| 567 | S | 3 | 9   | 2    |
| 567 | S | 3 | 32  | 2    |
| 567 | M | 3 | 10  | 1    |

|     |   |   |     |      |
|-----|---|---|-----|------|
| 567 | S | 3 | 24  | 1    |
| 567 | S | 3 | 54  | 1    |
| 599 | S | 2 | 6   | 8942 |
| 599 | S | 2 | 3   | 562  |
| 599 | M | 2 | 6   | 14   |
| 599 | S | 2 | 11  | 13   |
| 599 | S | 2 | 5   | 1    |
| 626 | S | 2 | 2   | 1877 |
| 626 | M | 2 | 2   | 41   |
| 626 | M | 2 | 3   | 1    |
| 690 | W | 3 | 17  | 7925 |
| 690 | M | 3 | 13  | 748  |
| 690 | W | 3 | 4   | 625  |
| 690 | W | 3 | 13  | 470  |
| 690 | W | 3 | 16  | 27   |
| 690 | W | 3 | 23  | 15   |
| 690 | W | 3 | 34  | 11   |
| 690 | M | 3 | 17  | 10   |
| 690 | W | 3 | 42  | 8    |
| 690 | M | 3 | 34  | 4    |
| 690 | M | 3 | 4   | 3    |
| 690 | M | 3 | 16  | 2    |
| 690 | W | 3 | 26  | 1    |
| 690 | M | 3 | 26  | 1    |
| 690 | W | 3 | 14  | 1    |
| 690 | M | 3 | 37  | 1    |
| 690 | M | 3 | 5   | 1    |
| 696 | W | 3 | 15  | 7893 |
| 696 | W | 3 | 11  | 199  |
| 696 | W | 3 | 2   | 139  |
| 696 | W | 3 | 14  | 30   |
| 696 | W | 3 | 21  | 15   |
| 696 | W | 3 | 40  | 8    |
| 696 | W | 3 | 32  | 2    |
| 696 | W | 3 | 12  | 1    |
| 696 | W | 3 | 35  | 1    |
| 700 | W | 1 | 236 | 517  |
| 700 | M | 1 | 236 | 9    |
| 704 | M | 2 | 6   | 8891 |
| 704 | M | 2 | 7   | 39   |
| 724 | M | 1 | 228 | 9309 |
| 724 | W | 1 | 228 | 101  |
| 724 | S | 1 | 228 | 2    |

|     |   |   |     |      |
|-----|---|---|-----|------|
| 731 | M | 2 | 14  | 8986 |
| 731 | M | 2 | 19  | 508  |
| 731 | M | 2 | 70  | 129  |
| 731 | M | 2 | 25  | 18   |
| 731 | M | 2 | 2   | 7    |
| 731 | M | 2 | 102 | 7    |
| 731 | M | 2 | 44  | 6    |
| 731 | M | 2 | 15  | 5    |
| 731 | M | 2 | 12  | 3    |
| 731 | M | 2 | 23  | 2    |
| 731 | M | 2 | 20  | 2    |
| 731 | W | 2 | 14  | 1    |
| 743 | S | 2 | 10  | 8955 |
| 743 | S | 2 | 15  | 514  |
| 743 | S | 2 | 66  | 241  |
| 743 | S | 2 | 21  | 34   |
| 743 | M | 2 | 10  | 24   |
| 743 | S | 2 | 40  | 22   |
| 743 | S | 2 | 19  | 9    |
| 743 | S | 2 | 98  | 7    |
| 743 | S | 2 | 11  | 5    |
| 743 | S | 2 | 16  | 4    |
| 743 | S | 2 | 8   | 3    |
| 743 | M | 2 | 40  | 1    |
| 743 | M | 2 | 66  | 1    |
| 743 | M | 2 | 15  | 1    |
| 805 | M | 1 | 201 | 7658 |
| 805 | S | 1 | 201 | 13   |
| 809 | W | 2 | 44  | 8405 |
| 809 | W | 2 | 18  | 1217 |
| 809 | W | 2 | 76  | 134  |
| 809 | W | 2 | 40  | 31   |
| 809 | W | 2 | 34  | 8    |
| 809 | W | 2 | 17  | 7    |
| 809 | W | 2 | 38  | 1    |
| 809 | W | 2 | 68  | 1    |
| 827 | M | 2 | 38  | 8249 |
| 827 | M | 2 | 12  | 1140 |
| 827 | M | 2 | 70  | 132  |
| 827 | M | 2 | 34  | 25   |
| 827 | M | 2 | 28  | 8    |
| 827 | M | 2 | 11  | 6    |
| 827 | M | 2 | 62  | 1    |

|     |   |   |     |      |
|-----|---|---|-----|------|
| 834 | M | 3 | 5   | 9075 |
| 834 | M | 3 | 7   | 14   |
| 834 | M | 3 | 32  | 3    |
| 834 | M | 3 | 14  | 2    |
| 834 | M | 3 | 8   | 2    |
| 834 | M | 3 | 16  | 2    |
| 851 | W | 2 | 4   | 711  |
| 851 | W | 2 | 30  | 219  |
| 851 | W | 2 | 26  | 8    |
| 851 | W | 2 | 62  | 4    |
| 851 | M | 2 | 3   | 1    |
| 865 | M | 1 | 181 | 1205 |
| 865 | W | 1 | 181 | 1    |
| 867 | W | 3 | 5   | 7782 |
| 867 | W | 3 | 3   | 265  |
| 867 | W | 3 | 39  | 65   |
| 867 | M | 3 | 5   | 29   |
| 867 | W | 3 | 40  | 5    |
| 867 | W | 3 | 11  | 4    |
| 867 | W | 3 | 17  | 3    |
| 867 | M | 3 | 3   | 3    |
| 867 | W | 3 | 35  | 3    |
| 867 | M | 3 | 21  | 2    |
| 867 | M | 3 | 17  | 1    |
| 867 | W | 3 | 21  | 1    |
| 867 | M | 3 | 39  | 1    |
| 867 | W | 3 | 10  | 1    |
| 873 | W | 3 | 3   | 339  |
| 873 | W | 3 | 38  | 309  |
| 873 | W | 3 | 33  | 135  |
| 873 | W | 3 | 21  | 79   |
| 873 | W | 3 | 37  | 25   |
| 873 | W | 3 | 9   | 11   |
| 873 | W | 3 | 19  | 9    |
| 873 | W | 3 | 49  | 2    |
| 873 | W | 3 | 15  | 1    |
| 873 | W | 3 | 32  | 1    |
| 873 | W | 3 | 6   | 1    |
| 890 | S | 2 | 17  | 8125 |
| 890 | M | 2 | 17  | 892  |
| 890 | S | 2 | 13  | 664  |
| 890 | S | 2 | 49  | 126  |
| 890 | M | 2 | 49  | 36   |

|      |   |   |    |      |
|------|---|---|----|------|
| 890  | S | 2 | 7  | 8    |
| 890  | S | 2 | 11 | 1    |
| 890  | S | 2 | 41 | 1    |
| 906  | S | 3 | 8  | 633  |
| 906  | S | 3 | 27 | 464  |
| 906  | S | 3 | 22 | 145  |
| 906  | S | 3 | 10 | 102  |
| 906  | S | 3 | 26 | 84   |
| 906  | S | 3 | 21 | 49   |
| 906  | S | 3 | 4  | 45   |
| 906  | S | 3 | 6  | 4    |
| 906  | S | 3 | 38 | 3    |
| 906  | S | 3 | 5  | 2    |
| 906  | S | 3 | 16 | 2    |
| 951  | W | 3 | 11 | 7612 |
| 951  | W | 3 | 6  | 909  |
| 951  | W | 3 | 12 | 775  |
| 951  | W | 3 | 7  | 282  |
| 951  | W | 3 | 23 | 7    |
| 986  | W | 2 | 17 | 9775 |
| 986  | W | 2 | 9  | 26   |
| 986  | W | 2 | 3  | 5    |
| 986  | W | 2 | 30 | 2    |
| 986  | M | 2 | 17 | 1    |
| 989  | S | 2 | 16 | 1720 |
| 989  | S | 2 | 8  | 16   |
| 989  | M | 2 | 16 | 8    |
| 989  | S | 2 | 2  | 3    |
| 989  | S | 2 | 29 | 1    |
| 1022 | M | 2 | 5  | 9673 |
| 1022 | W | 2 | 5  | 2    |
| 1022 | M | 2 | 18 | 2    |
| 1022 | S | 2 | 5  | 2    |
| 1031 | M | 2 | 2  | 9774 |
| 1031 | S | 2 | 2  | 6    |
| 1031 | M | 2 | 15 | 2    |
| 1058 | S | 2 | 6  | 1033 |
| 1058 | S | 2 | 20 | 9    |
| 1058 | M | 2 | 6  | 3    |
| 1064 | S | 2 | 4  | 9457 |
| 1064 | S | 2 | 18 | 200  |
| 1064 | S | 2 | 34 | 2    |
| 1064 | M | 2 | 4  | 1    |

|      |   |   |    |      |
|------|---|---|----|------|
| 1117 | M | 1 | 97 | 9776 |
| 1117 | S | 1 | 97 | 48   |
| 1133 | M | 2 | 11 | 2044 |
| 1133 | M | 2 | 16 | 161  |
| 1133 | M | 2 | 18 | 8    |
| 1133 | M | 2 | 3  | 6    |
| 1133 | M | 2 | 10 | 4    |
| 1133 | M | 2 | 15 | 3    |
| 1133 | M | 2 | 4  | 1    |
| 1137 | M | 3 | 6  | 7933 |
| 1137 | M | 3 | 4  | 421  |
| 1137 | M | 3 | 18 | 196  |
| 1137 | M | 3 | 2  | 140  |
| 1137 | M | 3 | 5  | 99   |
| 1137 | M | 3 | 10 | 1    |
| 1137 | M | 3 | 39 | 1    |
| 1165 | W | 1 | 81 | 728  |
| 1190 | W | 2 | 15 | 7861 |
| 1190 | M | 2 | 15 | 4    |
| 1190 | W | 2 | 21 | 1    |
| 1243 | M | 1 | 55 | 904  |
| 1243 | S | 1 | 55 | 85   |
| 1252 | W | 1 | 52 | 1058 |
| 1368 | S | 3 | 5  | 918  |
| 1368 | S | 3 | 11 | 6    |

**Table S30. Length and count data for influenza A putative ORFs accompanying Figure S28 (N2).**

| <b>Position</b> | <b>Kozak</b> | <b>Frame</b> | <b>Length</b> | <b>Count</b> |
|-----------------|--------------|--------------|---------------|--------------|
| 1               | W            | 1            | 469           | 9651         |
| 60              | M            | 3            | 20            | 8616         |
| 60              | M            | 3            | 17            | 356          |
| 60              | M            | 3            | 33            | 222          |
| 60              | M            | 3            | 19            | 43           |
| 60              | W            | 3            | 20            | 24           |
| 60              | M            | 3            | 22            | 16           |
| 60              | M            | 3            | 28            | 6            |
| 60              | M            | 3            | 86            | 4            |
| 60              | M            | 3            | 27            | 4            |
| 60              | M            | 3            | 11            | 3            |
| 60              | M            | 3            | 26            | 3            |
| 60              | M            | 3            | 49            | 3            |
| 60              | S            | 3            | 20            | 1            |
| 60              | M            | 3            | 74            | 1            |
| 60              | M            | 3            | 64            | 1            |
| 70              | W            | 1            | 446           | 9305         |
| 70              | M            | 1            | 446           | 78           |
| 119             | M            | 2            | 10            | 7851         |
| 119             | M            | 2            | 17            | 1050         |
| 119             | M            | 2            | 6             | 78           |
| 119             | S            | 2            | 10            | 51           |
| 119             | M            | 2            | 16            | 33           |
| 119             | W            | 2            | 10            | 8            |
| 119             | S            | 2            | 17            | 6            |
| 119             | S            | 2            | 6             | 4            |
| 119             | M            | 2            | 11            | 3            |
| 119             | M            | 2            | 18            | 3            |
| 119             | W            | 2            | 6             | 2            |
| 119             | M            | 2            | 2             | 1            |
| 119             | W            | 2            | 17            | 1            |
| 119             | M            | 2            | 20            | 1            |
| 119             | S            | 2            | 16            | 1            |
| 123             | W            | 3            | 12            | 2701         |
| 123             | W            | 3            | 6             | 140          |
| 123             | W            | 3            | 28            | 34           |
| 123             | W            | 3            | 22            | 8            |
| 123             | W            | 3            | 5             | 5            |
| 123             | W            | 3            | 51            | 3            |



|     |   |   |     |      |
|-----|---|---|-----|------|
| 123 | M | 3 | 12  | 2    |
| 123 | M | 3 | 5   | 2    |
| 123 | W | 3 | 7   | 2    |
| 123 | W | 3 | 38  | 1    |
| 123 | M | 3 | 6   | 1    |
| 123 | W | 3 | 43  | 1    |
| 123 | W | 3 | 65  | 1    |
| 123 | W | 3 | 4   | 1    |
| 151 | M | 1 | 419 | 7840 |
| 151 | W | 1 | 419 | 6    |
| 151 | S | 1 | 419 | 1    |
| 231 | M | 3 | 15  | 6547 |
| 231 | M | 3 | 7   | 726  |
| 231 | M | 3 | 24  | 475  |
| 231 | M | 3 | 2   | 44   |
| 231 | M | 3 | 5   | 35   |
| 231 | M | 3 | 49  | 29   |
| 231 | M | 3 | 69  | 9    |
| 231 | M | 3 | 29  | 7    |
| 231 | M | 3 | 40  | 3    |
| 231 | M | 3 | 73  | 2    |
| 231 | M | 3 | 64  | 2    |
| 231 | M | 3 | 11  | 2    |
| 231 | S | 3 | 15  | 1    |
| 231 | M | 3 | 47  | 1    |
| 273 | M | 3 | 10  | 598  |
| 273 | M | 3 | 33  | 380  |
| 273 | M | 3 | 36  | 180  |
| 273 | M | 3 | 15  | 160  |
| 273 | W | 3 | 15  | 139  |
| 273 | M | 3 | 35  | 45   |
| 273 | W | 3 | 55  | 40   |
| 273 | M | 3 | 12  | 17   |
| 273 | M | 3 | 59  | 15   |
| 273 | W | 3 | 35  | 9    |
| 273 | W | 3 | 10  | 7    |
| 273 | W | 3 | 51  | 6    |
| 273 | M | 3 | 26  | 6    |
| 273 | M | 3 | 55  | 5    |
| 273 | W | 3 | 3   | 4    |
| 273 | M | 3 | 51  | 4    |
| 273 | W | 3 | 50  | 3    |
| 273 | W | 3 | 36  | 3    |

|     |   |   |    |      |
|-----|---|---|----|------|
| 273 | W | 3 | 59 | 2    |
| 273 | W | 3 | 12 | 2    |
| 273 | M | 3 | 21 | 1    |
| 273 | W | 3 | 33 | 1    |
| 273 | M | 3 | 50 | 1    |
| 362 | W | 2 | 19 | 8642 |
| 362 | W | 2 | 38 | 838  |
| 362 | W | 2 | 13 | 86   |
| 362 | M | 2 | 19 | 8    |
| 362 | W | 2 | 5  | 3    |
| 362 | M | 2 | 38 | 1    |
| 362 | W | 2 | 27 | 1    |
| 362 | W | 2 | 28 | 1    |
| 369 | M | 3 | 3  | 6776 |
| 369 | M | 3 | 23 | 1027 |
| 369 | M | 3 | 4  | 738  |
| 369 | M | 3 | 27 | 82   |
| 369 | M | 3 | 19 | 52   |
| 369 | W | 3 | 3  | 25   |
| 369 | M | 3 | 18 | 17   |
| 369 | W | 3 | 4  | 7    |
| 369 | M | 3 | 28 | 2    |
| 369 | W | 3 | 18 | 1    |
| 384 | W | 3 | 22 | 1156 |
| 384 | W | 3 | 18 | 260  |
| 384 | W | 3 | 23 | 126  |
| 384 | W | 3 | 14 | 106  |
| 384 | W | 3 | 13 | 72   |
| 384 | W | 3 | 12 | 8    |
| 384 | W | 3 | 27 | 6    |
| 384 | M | 3 | 23 | 2    |
| 384 | W | 3 | 51 | 2    |
| 384 | M | 3 | 22 | 1    |
| 384 | M | 3 | 13 | 1    |
| 384 | W | 3 | 15 | 1    |
| 384 | W | 3 | 17 | 1    |
| 437 | W | 2 | 13 | 4575 |
| 437 | M | 2 | 13 | 1285 |
| 437 | W | 2 | 2  | 16   |
| 437 | W | 2 | 12 | 2    |
| 437 | M | 2 | 14 | 1    |
| 437 | W | 2 | 14 | 1    |
| 437 | W | 2 | 10 | 1    |

|     |   |   |     |      |
|-----|---|---|-----|------|
| 437 | W | 2 | 3   | 1    |
| 449 | W | 2 | 9   | 6351 |
| 449 | M | 2 | 9   | 33   |
| 449 | W | 2 | 10  | 2    |
| 449 | W | 2 | 8   | 1    |
| 449 | W | 2 | 6   | 1    |
| 478 | W | 1 | 310 | 9647 |
| 478 | M | 1 | 310 | 3    |
| 482 | W | 2 | 15  | 4029 |
| 482 | W | 2 | 2   | 3795 |
| 482 | W | 2 | 8   | 975  |
| 482 | W | 2 | 33  | 70   |
| 482 | W | 2 | 51  | 18   |
| 482 | W | 2 | 78  | 4    |
| 482 | W | 2 | 9   | 3    |
| 482 | W | 2 | 50  | 1    |
| 526 | M | 1 | 294 | 730  |
| 531 | S | 3 | 20  | 7535 |
| 531 | S | 3 | 7   | 1360 |
| 531 | S | 3 | 21  | 257  |
| 531 | S | 3 | 2   | 157  |
| 531 | M | 3 | 7   | 28   |
| 531 | S | 3 | 4   | 19   |
| 531 | S | 3 | 19  | 16   |
| 531 | M | 3 | 20  | 8    |
| 531 | S | 3 | 26  | 2    |
| 531 | S | 3 | 22  | 2    |
| 531 | S | 3 | 9   | 2    |
| 531 | S | 3 | 8   | 1    |
| 531 | M | 3 | 21  | 1    |
| 551 | M | 2 | 55  | 1344 |
| 551 | M | 2 | 10  | 138  |
| 551 | M | 2 | 56  | 87   |
| 551 | M | 2 | 28  | 37   |
| 551 | M | 2 | 39  | 31   |
| 551 | M | 2 | 27  | 26   |
| 551 | M | 2 | 26  | 10   |
| 551 | M | 2 | 15  | 5    |
| 551 | M | 2 | 49  | 2    |
| 551 | M | 2 | 31  | 2    |
| 551 | M | 2 | 57  | 2    |
| 551 | M | 2 | 3   | 1    |
| 554 | S | 2 | 9   | 7341 |

|     |   |   |    |      |
|-----|---|---|----|------|
| 554 | S | 2 | 54 | 1558 |
| 554 | S | 2 | 27 | 456  |
| 554 | S | 2 | 55 | 89   |
| 554 | S | 2 | 38 | 31   |
| 554 | S | 2 | 26 | 27   |
| 554 | S | 2 | 25 | 10   |
| 554 | S | 2 | 14 | 5    |
| 554 | S | 2 | 30 | 2    |
| 554 | S | 2 | 48 | 2    |
| 554 | M | 2 | 9  | 2    |
| 554 | S | 2 | 56 | 2    |
| 554 | S | 2 | 35 | 1    |
| 554 | S | 2 | 2  | 1    |
| 564 | S | 3 | 9  | 9022 |
| 564 | S | 3 | 10 | 296  |
| 564 | S | 3 | 8  | 20   |
| 564 | M | 3 | 9  | 7    |
| 564 | S | 3 | 15 | 3    |
| 564 | S | 3 | 11 | 2    |
| 564 | S | 3 | 19 | 1    |
| 572 | W | 2 | 3  | 7321 |
| 572 | W | 2 | 48 | 1093 |
| 572 | W | 2 | 21 | 419  |
| 572 | W | 2 | 49 | 42   |
| 572 | W | 2 | 32 | 25   |
| 572 | W | 2 | 20 | 22   |
| 572 | W | 2 | 19 | 10   |
| 572 | W | 2 | 8  | 5    |
| 572 | W | 2 | 42 | 2    |
| 572 | W | 2 | 29 | 1    |
| 590 | M | 2 | 15 | 7106 |
| 590 | M | 2 | 42 | 1814 |
| 590 | M | 2 | 14 | 219  |
| 590 | M | 2 | 43 | 89   |
| 590 | M | 2 | 26 | 32   |
| 590 | M | 2 | 2  | 11   |
| 590 | M | 2 | 13 | 10   |
| 590 | M | 2 | 8  | 9    |
| 590 | M | 2 | 18 | 2    |
| 590 | M | 2 | 36 | 2    |
| 590 | M | 2 | 44 | 2    |
| 590 | M | 2 | 23 | 1    |
| 593 | M | 2 | 14 | 1735 |

|     |   |   |    |      |
|-----|---|---|----|------|
| 593 | M | 2 | 41 | 100  |
| 593 | S | 2 | 14 | 25   |
| 593 | S | 2 | 41 | 10   |
| 593 | M | 2 | 13 | 8    |
| 593 | M | 2 | 7  | 2    |
| 593 | S | 2 | 42 | 2    |
| 593 | M | 2 | 42 | 1    |
| 599 | M | 2 | 12 | 7385 |
| 599 | M | 2 | 39 | 1826 |
| 599 | M | 2 | 11 | 219  |
| 599 | M | 2 | 40 | 91   |
| 599 | M | 2 | 23 | 32   |
| 599 | W | 2 | 12 | 28   |
| 599 | M | 2 | 10 | 10   |
| 599 | M | 2 | 5  | 9    |
| 599 | W | 2 | 39 | 8    |
| 599 | W | 2 | 11 | 2    |
| 599 | M | 2 | 41 | 2    |
| 599 | M | 2 | 15 | 2    |
| 599 | M | 2 | 33 | 2    |
| 599 | M | 2 | 20 | 1    |
| 620 | W | 2 | 32 | 1322 |
| 620 | W | 2 | 33 | 84   |
| 620 | M | 2 | 32 | 52   |
| 620 | W | 2 | 16 | 32   |
| 620 | W | 2 | 4  | 25   |
| 620 | W | 2 | 5  | 18   |
| 620 | W | 2 | 3  | 10   |
| 620 | W | 2 | 26 | 2    |
| 620 | W | 2 | 8  | 2    |
| 620 | W | 2 | 34 | 2    |
| 620 | M | 2 | 33 | 1    |
| 623 | S | 2 | 4  | 7311 |
| 623 | S | 2 | 31 | 1461 |
| 623 | S | 2 | 3  | 221  |
| 623 | S | 2 | 32 | 82   |
| 623 | S | 2 | 15 | 33   |
| 623 | M | 2 | 4  | 3    |
| 623 | S | 2 | 33 | 2    |
| 623 | S | 2 | 25 | 2    |
| 623 | S | 2 | 7  | 2    |
| 623 | M | 2 | 31 | 1    |
| 623 | S | 2 | 12 | 1    |

|     |   |   |     |      |
|-----|---|---|-----|------|
| 628 | M | 1 | 260 | 1048 |
| 628 | S | 1 | 260 | 2    |
| 651 | M | 3 | 25  | 8401 |
| 651 | M | 3 | 2   | 308  |
| 651 | M | 3 | 16  | 248  |
| 651 | M | 3 | 6   | 60   |
| 651 | M | 3 | 33  | 42   |
| 651 | M | 3 | 11  | 35   |
| 651 | S | 3 | 2   | 31   |
| 651 | M | 3 | 17  | 23   |
| 651 | M | 3 | 3   | 19   |
| 651 | S | 3 | 25  | 13   |
| 651 | M | 3 | 31  | 12   |
| 651 | M | 3 | 40  | 7    |
| 651 | M | 3 | 9   | 6    |
| 651 | S | 3 | 6   | 2    |
| 651 | S | 3 | 17  | 1    |
| 651 | W | 3 | 25  | 1    |
| 651 | S | 3 | 33  | 1    |
| 687 | M | 3 | 13  | 8492 |
| 687 | M | 3 | 4   | 275  |
| 687 | M | 3 | 21  | 157  |
| 687 | W | 3 | 21  | 111  |
| 687 | W | 3 | 13  | 44   |
| 687 | M | 3 | 5   | 27   |
| 687 | M | 3 | 19  | 12   |
| 687 | M | 3 | 28  | 7    |
| 687 | W | 3 | 5   | 4    |
| 687 | M | 3 | 23  | 1    |
| 687 | W | 3 | 23  | 1    |
| 687 | W | 3 | 4   | 1    |
| 701 | M | 2 | 5   | 8982 |
| 701 | M | 2 | 6   | 339  |
| 701 | W | 2 | 5   | 14   |
| 701 | M | 2 | 4   | 6    |
| 701 | M | 2 | 7   | 3    |
| 701 | W | 2 | 6   | 1    |
| 721 | M | 1 | 229 | 9629 |
| 721 | W | 1 | 229 | 4    |
| 728 | M | 2 | 60  | 6480 |
| 728 | M | 2 | 32  | 1731 |
| 728 | M | 2 | 59  | 568  |
| 728 | M | 2 | 62  | 309  |

|     |   |   |     |      |
|-----|---|---|-----|------|
| 728 | M | 2 | 26  | 170  |
| 728 | M | 2 | 22  | 123  |
| 728 | M | 2 | 19  | 122  |
| 728 | M | 2 | 44  | 42   |
| 728 | M | 2 | 25  | 35   |
| 728 | M | 2 | 11  | 19   |
| 728 | M | 2 | 14  | 10   |
| 728 | M | 2 | 6   | 8    |
| 728 | M | 2 | 4   | 4    |
| 728 | M | 2 | 106 | 2    |
| 728 | M | 2 | 20  | 1    |
| 728 | M | 2 | 49  | 1    |
| 728 | M | 2 | 12  | 1    |
| 821 | M | 2 | 29  | 6716 |
| 821 | M | 2 | 28  | 579  |
| 821 | M | 2 | 31  | 343  |
| 821 | M | 2 | 13  | 40   |
| 821 | M | 2 | 75  | 2    |
| 821 | M | 2 | 18  | 1    |
| 831 | M | 3 | 10  | 763  |
| 831 | M | 3 | 21  | 440  |
| 831 | M | 3 | 22  | 256  |
| 831 | M | 3 | 33  | 76   |
| 831 | M | 3 | 14  | 32   |
| 831 | M | 3 | 8   | 28   |
| 831 | M | 3 | 16  | 20   |
| 831 | M | 3 | 5   | 12   |
| 831 | W | 3 | 10  | 1    |
| 857 | W | 2 | 17  | 514  |
| 857 | W | 2 | 16  | 5    |
| 857 | W | 2 | 19  | 3    |
| 864 | W | 3 | 11  | 7505 |
| 864 | W | 3 | 10  | 1042 |
| 864 | W | 3 | 22  | 337  |
| 864 | W | 3 | 5   | 285  |
| 864 | W | 3 | 3   | 149  |
| 864 | M | 3 | 11  | 42   |
| 864 | M | 3 | 10  | 12   |
| 864 | M | 3 | 3   | 6    |
| 864 | W | 3 | 20  | 1    |
| 864 | M | 3 | 5   | 1    |
| 864 | W | 3 | 17  | 1    |
| 919 | S | 1 | 163 | 1612 |

|      |   |   |     |      |
|------|---|---|-----|------|
| 919  | M | 1 | 163 | 192  |
| 947  | M | 2 | 33  | 6840 |
| 947  | M | 2 | 22  | 2416 |
| 947  | M | 2 | 16  | 12   |
| 947  | M | 2 | 5   | 5    |
| 947  | M | 2 | 6   | 4    |
| 947  | M | 2 | 12  | 4    |
| 947  | W | 2 | 22  | 3    |
| 947  | M | 2 | 28  | 3    |
| 947  | M | 2 | 76  | 2    |
| 947  | M | 2 | 56  | 2    |
| 947  | W | 2 | 33  | 1    |
| 947  | M | 2 | 81  | 1    |
| 947  | M | 2 | 31  | 1    |
| 951  | W | 3 | 17  | 997  |
| 951  | W | 3 | 6   | 187  |
| 951  | W | 3 | 12  | 168  |
| 951  | W | 3 | 9   | 65   |
| 951  | W | 3 | 11  | 23   |
| 951  | W | 3 | 13  | 22   |
| 951  | W | 3 | 15  | 16   |
| 951  | W | 3 | 23  | 6    |
| 951  | W | 3 | 16  | 5    |
| 986  | M | 2 | 20  | 1421 |
| 986  | M | 2 | 9   | 144  |
| 986  | W | 2 | 20  | 2    |
| 986  | M | 2 | 3   | 1    |
| 986  | M | 2 | 15  | 1    |
| 986  | M | 2 | 68  | 1    |
| 1025 | M | 2 | 7   | 9318 |
| 1025 | M | 2 | 30  | 3    |
| 1025 | M | 2 | 50  | 3    |
| 1025 | M | 2 | 2   | 2    |
| 1025 | W | 2 | 7   | 1    |
| 1025 | M | 2 | 5   | 1    |
| 1040 | S | 2 | 2   | 7651 |
| 1040 | S | 2 | 25  | 3    |
| 1040 | S | 2 | 45  | 3    |
| 1040 | M | 2 | 2   | 1    |
| 1064 | W | 2 | 17  | 3789 |
| 1064 | W | 2 | 37  | 3091 |
| 1064 | W | 2 | 42  | 476  |
| 1064 | W | 2 | 11  | 152  |



|      |   |   |    |      |
|------|---|---|----|------|
| 1064 | W | 2 | 25 | 12   |
| 1064 | W | 2 | 24 | 4    |
| 1064 | W | 2 | 71 | 3    |
| 1064 | W | 2 | 13 | 2    |
| 1064 | W | 2 | 41 | 1    |
| 1064 | W | 2 | 7  | 1    |
| 1067 | S | 2 | 36 | 3836 |
| 1067 | S | 2 | 16 | 3815 |
| 1067 | S | 2 | 41 | 1357 |
| 1067 | S | 2 | 10 | 172  |
| 1067 | M | 2 | 41 | 54   |
| 1067 | S | 2 | 29 | 24   |
| 1067 | S | 2 | 24 | 20   |
| 1067 | M | 2 | 16 | 16   |
| 1067 | S | 2 | 23 | 14   |
| 1067 | M | 2 | 36 | 8    |
| 1067 | S | 2 | 40 | 5    |
| 1067 | S | 2 | 70 | 4    |
| 1067 | M | 2 | 29 | 4    |
| 1067 | S | 2 | 12 | 3    |
| 1067 | S | 2 | 21 | 1    |
| 1067 | S | 2 | 6  | 1    |
| 1073 | M | 2 | 34 | 3816 |
| 1073 | M | 2 | 14 | 3780 |
| 1073 | M | 2 | 39 | 1513 |
| 1073 | M | 2 | 8  | 169  |
| 1073 | M | 2 | 22 | 22   |
| 1073 | M | 2 | 27 | 17   |
| 1073 | M | 2 | 21 | 12   |
| 1073 | M | 2 | 68 | 9    |
| 1073 | M | 2 | 38 | 8    |
| 1073 | M | 2 | 10 | 3    |
| 1073 | M | 2 | 4  | 1    |
| 1073 | M | 2 | 19 | 1    |
| 1076 | M | 2 | 38 | 885  |
| 1076 | M | 2 | 33 | 769  |
| 1076 | M | 2 | 13 | 109  |
| 1076 | M | 2 | 26 | 28   |
| 1076 | M | 2 | 7  | 23   |
| 1076 | M | 2 | 21 | 21   |
| 1076 | W | 2 | 33 | 11   |
| 1076 | M | 2 | 20 | 10   |
| 1076 | M | 2 | 37 | 7    |

|      |   |   |     |      |
|------|---|---|-----|------|
| 1076 | M | 2 | 67  | 7    |
| 1076 | W | 2 | 13  | 1    |
| 1076 | M | 2 | 9   | 1    |
| 1076 | M | 2 | 18  | 1    |
| 1076 | W | 2 | 26  | 1    |
| 1084 | M | 1 | 108 | 9649 |
| 1121 | M | 2 | 18  | 6901 |
| 1121 | M | 2 | 23  | 2514 |
| 1121 | M | 2 | 5   | 29   |
| 1121 | M | 2 | 11  | 26   |
| 1121 | M | 2 | 6   | 22   |
| 1121 | M | 2 | 22  | 14   |
| 1121 | M | 2 | 52  | 12   |
| 1121 | M | 2 | 3   | 1    |
| 1268 | W | 2 | 3   | 9094 |
| 1268 | W | 2 | 4   | 12   |
| 1268 | M | 2 | 3   | 1    |
| 1308 | S | 3 | 23  | 1058 |
| 1308 | S | 3 | 5   | 492  |
| 1308 | S | 3 | 4   | 6    |
| 1308 | M | 3 | 23  | 1    |
| 1371 | M | 3 | 2   | 9578 |
| 1371 | W | 3 | 2   | 3    |
| 1399 | W | 1 | 3   | 9502 |
| 1399 | M | 1 | 3   | 137  |

**Table S31. Length and count data for influenza A putative ORFs accompanying Figure S29 (N3).**

| <b>Position</b> | <b>Kozak</b> | <b>Frame</b> | <b>Length</b> | <b>Count</b> |
|-----------------|--------------|--------------|---------------|--------------|
| 1               | W            | 1            | 469           | 699          |
| 107             | W            | 2            | 3             | 637          |
| 107             | M            | 2            | 3             | 27           |
| 107             | M            | 2            | 27            | 14           |
| 107             | W            | 2            | 26            | 7            |
| 107             | W            | 2            | 9             | 5            |
| 107             | M            | 2            | 26            | 3            |
| 107             | W            | 2            | 8             | 1            |
| 107             | W            | 2            | 14            | 1            |
| 273             | M            | 3            | 18            | 20           |
| 273             | M            | 3            | 10            | 19           |
| 273             | M            | 3            | 31            | 4            |
| 273             | W            | 3            | 18            | 2            |
| 311             | M            | 2            | 11            | 440          |
| 311             | M            | 2            | 10            | 178          |
| 311             | M            | 2            | 2             | 45           |
| 311             | M            | 2            | 4             | 22           |
| 338             | M            | 2            | 2             | 58           |
| 338             | M            | 2            | 3             | 22           |
| 362             | W            | 2            | 19            | 470          |
| 362             | W            | 2            | 37            | 116          |
| 362             | W            | 2            | 13            | 16           |
| 362             | W            | 2            | 28            | 1            |
| 377             | M            | 2            | 14            | 482          |
| 377             | M            | 2            | 32            | 99           |
| 377             | M            | 2            | 8             | 28           |
| 377             | M            | 2            | 23            | 4            |
| 377             | W            | 2            | 32            | 1            |
| 380             | M            | 2            | 31            | 82           |
| 380             | M            | 2            | 13            | 30           |
| 380             | S            | 2            | 31            | 4            |
| 380             | S            | 2            | 7             | 2            |
| 437             | S            | 2            | 12            | 685          |
| 437             | S            | 2            | 3             | 10           |
| 525             | M            | 3            | 10            | 430          |
| 525             | M            | 3            | 6             | 197          |
| 525             | M            | 3            | 25            | 16           |
| 525             | M            | 3            | 7             | 11           |
| 525             | M            | 3            | 23            | 7            |

|     |   |   |     |     |
|-----|---|---|-----|-----|
| 525 | M | 3 | 5   | 5   |
| 525 | M | 3 | 24  | 4   |
| 557 | M | 2 | 9   | 236 |
| 557 | M | 2 | 20  | 23  |
| 567 | S | 3 | 11  | 144 |
| 567 | S | 3 | 9   | 53  |
| 567 | S | 3 | 10  | 28  |
| 571 | W | 1 | 279 | 680 |
| 575 | W | 2 | 3   | 616 |
| 575 | W | 2 | 14  | 37  |
| 579 | W | 3 | 6   | 80  |
| 579 | W | 3 | 5   | 19  |
| 579 | W | 3 | 7   | 7   |
| 583 | W | 1 | 275 | 657 |
| 583 | M | 1 | 275 | 2   |
| 593 | M | 2 | 8   | 141 |
| 599 | M | 2 | 6   | 683 |
| 599 | M | 2 | 12  | 3   |
| 599 | S | 2 | 6   | 2   |
| 602 | M | 2 | 5   | 672 |
| 602 | M | 2 | 11  | 3   |
| 619 | M | 1 | 263 | 50  |
| 623 | W | 2 | 4   | 432 |
| 623 | M | 2 | 4   | 225 |
| 623 | W | 2 | 8   | 24  |
| 623 | W | 2 | 16  | 5   |
| 634 | M | 1 | 258 | 687 |
| 634 | S | 1 | 258 | 2   |
| 634 | W | 1 | 258 | 1   |
| 654 | S | 3 | 11  | 524 |
| 654 | S | 3 | 30  | 63  |
| 654 | S | 3 | 16  | 60  |
| 654 | S | 3 | 31  | 34  |
| 654 | S | 3 | 29  | 5   |
| 654 | S | 3 | 25  | 3   |
| 690 | W | 3 | 4   | 531 |
| 690 | W | 3 | 18  | 74  |
| 690 | M | 3 | 19  | 23  |
| 690 | W | 3 | 19  | 17  |
| 690 | M | 3 | 17  | 5   |
| 690 | W | 3 | 13  | 4   |
| 690 | M | 3 | 4   | 1   |
| 696 | W | 3 | 2   | 547 |

|     |   |   |     |     |
|-----|---|---|-----|-----|
| 696 | W | 3 | 16  | 67  |
| 696 | W | 3 | 17  | 25  |
| 696 | W | 3 | 15  | 4   |
| 696 | W | 3 | 11  | 4   |
| 704 | M | 2 | 28  | 76  |
| 704 | M | 2 | 29  | 5   |
| 704 | M | 2 | 5   | 3   |
| 704 | M | 2 | 23  | 1   |
| 731 | M | 2 | 19  | 646 |
| 731 | M | 2 | 14  | 32  |
| 731 | M | 2 | 20  | 18  |
| 749 | M | 2 | 13  | 35  |
| 790 | M | 1 | 206 | 113 |
| 797 | M | 2 | 11  | 475 |
| 797 | M | 2 | 38  | 129 |
| 797 | M | 2 | 8   | 30  |
| 797 | M | 2 | 18  | 18  |
| 797 | M | 2 | 40  | 9   |
| 797 | M | 2 | 6   | 4   |
| 797 | M | 2 | 109 | 2   |
| 803 | M | 2 | 9   | 429 |
| 803 | M | 2 | 36  | 21  |
| 803 | M | 2 | 4   | 4   |
| 837 | M | 3 | 7   | 397 |
| 837 | M | 3 | 13  | 13  |
| 848 | M | 2 | 21  | 450 |
| 860 | W | 2 | 17  | 631 |
| 860 | M | 2 | 17  | 6   |
| 873 | W | 3 | 8   | 39  |
| 873 | W | 3 | 17  | 32  |
| 873 | W | 3 | 28  | 16  |
| 873 | W | 3 | 38  | 12  |
| 873 | W | 3 | 15  | 9   |
| 910 | W | 1 | 166 | 676 |
| 923 | M | 2 | 4   | 187 |
| 923 | M | 2 | 67  | 25  |
| 923 | M | 2 | 3   | 7   |
| 923 | M | 2 | 40  | 5   |
| 923 | M | 2 | 34  | 2   |
| 923 | M | 2 | 53  | 1   |
| 947 | M | 2 | 32  | 418 |
| 947 | M | 2 | 80  | 136 |
| 947 | M | 2 | 110 | 29  |

|      |   |   |     |     |
|------|---|---|-----|-----|
| 947  | M | 2 | 127 | 27  |
| 947  | M | 2 | 17  | 15  |
| 947  | M | 2 | 45  | 8   |
| 947  | M | 2 | 59  | 4   |
| 947  | M | 2 | 26  | 3   |
| 947  | M | 2 | 62  | 1   |
| 947  | M | 2 | 50  | 1   |
| 947  | M | 2 | 60  | 1   |
| 951  | W | 3 | 12  | 103 |
| 951  | W | 3 | 2   | 52  |
| 951  | W | 3 | 19  | 30  |
| 951  | W | 3 | 11  | 9   |
| 1000 | M | 1 | 136 | 297 |
| 1022 | M | 2 | 7   | 400 |
| 1022 | M | 2 | 55  | 50  |
| 1022 | M | 2 | 85  | 26  |
| 1022 | M | 2 | 102 | 4   |
| 1022 | M | 2 | 25  | 1   |
| 1022 | M | 2 | 35  | 1   |
| 1022 | M | 2 | 20  | 1   |
| 1028 | M | 2 | 5   | 432 |
| 1028 | M | 2 | 53  | 152 |
| 1028 | M | 2 | 83  | 29  |
| 1028 | M | 2 | 100 | 28  |
| 1028 | M | 2 | 32  | 25  |
| 1028 | M | 2 | 18  | 8   |
| 1028 | M | 2 | 23  | 1   |
| 1028 | M | 2 | 35  | 1   |
| 1028 | M | 2 | 33  | 1   |
| 1070 | M | 2 | 4   | 257 |
| 1070 | M | 2 | 39  | 231 |
| 1070 | M | 2 | 86  | 46  |
| 1070 | M | 2 | 18  | 28  |
| 1070 | M | 2 | 69  | 26  |
| 1070 | M | 2 | 66  | 12  |
| 1070 | M | 2 | 21  | 1   |
| 1070 | M | 2 | 9   | 1   |
| 1073 | M | 2 | 3   | 295 |
| 1073 | M | 2 | 38  | 239 |
| 1073 | M | 2 | 85  | 79  |
| 1073 | M | 2 | 68  | 29  |
| 1073 | M | 2 | 17  | 28  |
| 1073 | M | 2 | 65  | 12  |

|      |   |   |    |     |
|------|---|---|----|-----|
| 1073 | M | 2 | 21 | 1   |
| 1073 | M | 2 | 18 | 1   |
| 1073 | M | 2 | 8  | 1   |
| 1077 | M | 3 | 3  | 389 |
| 1077 | M | 3 | 8  | 164 |
| 1077 | M | 3 | 14 | 74  |
| 1077 | M | 3 | 10 | 2   |
| 1143 | S | 3 | 19 | 37  |
| 1143 | S | 3 | 8  | 18  |
| 1143 | S | 3 | 2  | 16  |
| 1143 | S | 3 | 5  | 13  |
| 1143 | S | 3 | 30 | 2   |
| 1143 | S | 3 | 17 | 2   |
| 1163 | M | 2 | 8  | 384 |
| 1163 | M | 2 | 55 | 216 |
| 1163 | M | 2 | 38 | 32  |
| 1163 | M | 2 | 35 | 12  |
| 1163 | M | 2 | 4  | 2   |
| 1163 | M | 2 | 61 | 2   |
| 1163 | M | 2 | 22 | 1   |
| 1199 | M | 2 | 43 | 560 |
| 1199 | M | 2 | 26 | 39  |
| 1199 | M | 2 | 23 | 12  |
| 1199 | M | 2 | 49 | 3   |
| 1199 | M | 2 | 25 | 1   |
| 1199 | M | 2 | 11 | 1   |
| 1199 | M | 2 | 10 | 1   |
| 1241 | S | 2 | 29 | 165 |
| 1241 | S | 2 | 12 | 30  |
| 1241 | M | 2 | 29 | 6   |
| 1241 | W | 2 | 29 | 3   |
| 1241 | S | 2 | 35 | 2   |
| 1241 | S | 2 | 11 | 1   |
| 1245 | W | 3 | 8  | 39  |
| 1265 | W | 2 | 21 | 469 |
| 1265 | W | 2 | 4  | 6   |
| 1265 | W | 2 | 27 | 6   |
| 1265 | W | 2 | 3  | 1   |
| 1298 | M | 2 | 10 | 590 |
| 1298 | M | 2 | 16 | 10  |
| 1301 | M | 2 | 9  | 606 |
| 1301 | M | 2 | 15 | 8   |
| 1301 | W | 2 | 9  | 2   |

|      |   |   |    |     |
|------|---|---|----|-----|
| 1304 | M | 2 | 8  | 318 |
| 1304 | M | 2 | 14 | 4   |
| 1399 | W | 1 | 3  | 694 |



**Table S32. Length and count data for influenza A putative ORFs accompanying Figure S30 (N4).**

| <b>Position</b> | <b>Kozak</b> | <b>Frame</b> | <b>Length</b> | <b>Count</b> |
|-----------------|--------------|--------------|---------------|--------------|
| 1               | W            | 1            | 470           | 188          |
| 87              | W            | 3            | 5             | 134          |
| 87              | W            | 3            | 15            | 1            |
| 96              | S            | 3            | 2             | 144          |
| 96              | S            | 3            | 5             | 29           |
| 96              | S            | 3            | 25            | 12           |
| 96              | S            | 3            | 12            | 2            |
| 118             | W            | 1            | 431           | 9            |
| 131             | W            | 2            | 29            | 31           |
| 131             | M            | 2            | 29            | 1            |
| 131             | W            | 2            | 17            | 1            |
| 141             | M            | 3            | 10            | 24           |
| 141             | M            | 3            | 9             | 1            |
| 170             | M            | 2            | 6             | 107          |
| 170             | M            | 2            | 16            | 44           |
| 170             | M            | 2            | 4             | 28           |
| 170             | M            | 2            | 36            | 9            |
| 185             | W            | 2            | 11            | 69           |
| 185             | W            | 2            | 31            | 9            |
| 194             | W            | 2            | 8             | 114          |
| 194             | W            | 2            | 28            | 6            |
| 239             | W            | 2            | 13            | 83           |
| 241             | S            | 1            | 390           | 6            |
| 241             | W            | 1            | 390           | 4            |
| 270             | W            | 3            | 15            | 12           |
| 270             | W            | 3            | 35            | 12           |
| 270             | W            | 3            | 21            | 7            |
| 270             | W            | 3            | 19            | 6            |
| 270             | W            | 3            | 12            | 4            |
| 270             | W            | 3            | 3             | 2            |
| 285             | S            | 3            | 10            | 60           |
| 285             | S            | 3            | 5             | 18           |
| 285             | S            | 3            | 30            | 13           |
| 285             | S            | 3            | 16            | 7            |
| 285             | S            | 3            | 7             | 3            |
| 308             | S            | 2            | 30            | 175          |
| 308             | S            | 2            | 13            | 5            |
| 366             | M            | 3            | 4             | 97           |
| 366             | M            | 3            | 3             | 46           |

|     |   |   |     |     |
|-----|---|---|-----|-----|
| 366 | M | 3 | 18  | 5   |
| 377 | W | 2 | 7   | 67  |
| 381 | W | 3 | 13  | 131 |
| 381 | W | 3 | 41  | 26  |
| 381 | W | 3 | 12  | 15  |
| 419 | W | 2 | 8   | 161 |
| 419 | W | 2 | 17  | 1   |
| 434 | M | 2 | 3   | 142 |
| 434 | M | 2 | 12  | 1   |
| 472 | W | 1 | 313 | 188 |
| 531 | S | 3 | 6   | 135 |
| 531 | S | 3 | 7   | 9   |
| 546 | W | 3 | 15  | 30  |
| 546 | W | 3 | 2   | 9   |
| 546 | W | 3 | 52  | 5   |
| 546 | M | 3 | 2   | 2   |
| 554 | S | 2 | 5   | 43  |
| 593 | W | 2 | 4   | 103 |
| 593 | W | 2 | 7   | 31  |
| 593 | W | 2 | 6   | 1   |
| 623 | S | 2 | 2   | 144 |
| 623 | S | 2 | 7   | 35  |
| 623 | S | 2 | 32  | 8   |
| 667 | M | 1 | 248 | 188 |
| 687 | W | 3 | 5   | 55  |
| 687 | W | 3 | 46  | 1   |
| 693 | W | 3 | 3   | 112 |
| 693 | W | 3 | 21  | 1   |
| 701 | M | 2 | 6   | 183 |
| 701 | M | 2 | 21  | 2   |
| 701 | M | 2 | 7   | 1   |
| 701 | S | 2 | 6   | 1   |
| 721 | W | 1 | 230 | 25  |
| 728 | M | 2 | 12  | 81  |
| 740 | W | 2 | 8   | 118 |
| 740 | W | 2 | 10  | 9   |
| 740 | M | 2 | 8   | 1   |
| 787 | M | 1 | 208 | 11  |
| 787 | S | 1 | 208 | 6   |
| 793 | M | 1 | 206 | 122 |
| 793 | S | 1 | 206 | 2   |
| 793 | W | 1 | 206 | 2   |
| 800 | M | 2 | 36  | 143 |

|      |   |   |     |     |
|------|---|---|-----|-----|
| 800  | M | 2 | 4   | 1   |
| 806  | W | 2 | 34  | 141 |
| 806  | W | 2 | 78  | 23  |
| 806  | W | 2 | 59  | 4   |
| 806  | W | 2 | 2   | 1   |
| 831  | M | 3 | 10  | 51  |
| 831  | M | 3 | 21  | 6   |
| 831  | M | 3 | 6   | 2   |
| 857  | W | 2 | 17  | 38  |
| 857  | M | 2 | 61  | 22  |
| 857  | M | 2 | 17  | 14  |
| 857  | M | 2 | 42  | 5   |
| 864  | W | 3 | 3   | 34  |
| 864  | W | 3 | 19  | 8   |
| 903  | S | 3 | 6   | 105 |
| 903  | S | 3 | 8   | 8   |
| 944  | M | 2 | 23  | 110 |
| 944  | M | 2 | 32  | 52  |
| 944  | M | 2 | 16  | 9   |
| 944  | M | 2 | 13  | 4   |
| 982  | M | 1 | 143 | 11  |
| 986  | M | 2 | 9   | 109 |
| 986  | M | 2 | 18  | 67  |
| 986  | M | 2 | 2   | 9   |
| 999  | M | 3 | 6   | 6   |
| 999  | W | 3 | 6   | 4   |
| 999  | M | 3 | 19  | 4   |
| 999  | W | 3 | 19  | 2   |
| 1004 | S | 2 | 12  | 11  |
| 1019 | S | 2 | 7   | 158 |
| 1034 | S | 2 | 2   | 134 |
| 1061 | S | 2 | 6   | 188 |
| 1067 | S | 2 | 4   | 185 |
| 1120 | S | 1 | 97  | 181 |
| 1120 | M | 1 | 97  | 7   |
| 1130 | M | 2 | 18  | 157 |
| 1130 | M | 2 | 17  | 1   |
| 1136 | M | 2 | 16  | 176 |
| 1136 | M | 2 | 15  | 1   |
| 1140 | M | 3 | 16  | 104 |
| 1140 | M | 3 | 29  | 27  |
| 1140 | M | 3 | 17  | 18  |
| 1140 | M | 3 | 5   | 4   |

|      |   |   |    |     |
|------|---|---|----|-----|
| 1140 | M | 3 | 18 | 2   |
| 1166 | M | 2 | 6  | 186 |
| 1166 | M | 2 | 5  | 1   |
| 1190 | M | 2 | 30 | 61  |
| 1263 | M | 3 | 4  | 100 |
| 1263 | W | 3 | 4  | 43  |
| 1263 | M | 3 | 20 | 1   |
| 1279 | M | 1 | 44 | 188 |
| 1311 | M | 3 | 4  | 123 |
| 1311 | M | 3 | 2  | 64  |
| 1311 | M | 3 | 5  | 1   |
| 1371 | S | 3 | 9  | 134 |
| 1371 | S | 3 | 2  | 38  |
| 1379 | M | 2 | 8  | 188 |

**Table S33. Length and count data for influenza A putative ORFs accompanying Figure S31 (N5).**

| <b>Position</b> | <b>Kozak</b> | <b>Frame</b> | <b>Length</b> | <b>Count</b> |
|-----------------|--------------|--------------|---------------|--------------|
| 1               | W            | 1            | 473           | 167          |
| 74              | W            | 2            | 4             | 32           |
| 158             | M            | 2            | 3             | 165          |
| 158             | M            | 2            | 8             | 2            |
| 269             | M            | 2            | 6             | 138          |
| 269             | M            | 2            | 24            | 2            |
| 269             | M            | 2            | 5             | 1            |
| 302             | S            | 2            | 13            | 136          |
| 302             | S            | 2            | 4             | 25           |
| 302             | S            | 2            | 2             | 6            |
| 329             | M            | 2            | 4             | 153          |
| 360             | M            | 3            | 6             | 138          |
| 360             | M            | 3            | 18            | 12           |
| 375             | M            | 3            | 13            | 12           |
| 413             | W            | 2            | 8             | 167          |
| 466             | W            | 1            | 318           | 167          |
| 494             | W            | 2            | 25            | 152          |
| 494             | W            | 2            | 23            | 12           |
| 494             | W            | 2            | 27            | 1            |
| 525             | M            | 3            | 7             | 167          |
| 540             | M            | 3            | 2             | 159          |
| 540             | W            | 3            | 2             | 6            |
| 545             | M            | 2            | 8             | 154          |
| 545             | M            | 2            | 6             | 12           |
| 545             | M            | 2            | 10            | 1            |
| 548             | S            | 2            | 7             | 154          |
| 548             | S            | 2            | 5             | 12           |
| 548             | S            | 2            | 9             | 1            |
| 558             | S            | 3            | 10            | 77           |
| 587             | W            | 2            | 6             | 141          |
| 587             | W            | 2            | 17            | 25           |
| 593             | M            | 2            | 4             | 141          |
| 593             | M            | 2            | 15            | 25           |
| 599             | W            | 2            | 2             | 142          |
| 599             | W            | 2            | 13            | 25           |
| 614             | S            | 2            | 8             | 163          |
| 614             | S            | 2            | 7             | 4            |
| 622             | M            | 1            | 266           | 136          |
| 632             | W            | 2            | 2             | 156          |

|      |   |   |     |     |
|------|---|---|-----|-----|
| 645  | S | 3 | 33  | 144 |
| 645  | S | 3 | 30  | 15  |
| 645  | S | 3 | 29  | 6   |
| 645  | S | 3 | 41  | 1   |
| 645  | S | 3 | 47  | 1   |
| 681  | M | 3 | 21  | 118 |
| 681  | M | 3 | 18  | 15  |
| 681  | M | 3 | 17  | 6   |
| 681  | M | 3 | 29  | 1   |
| 687  | W | 3 | 19  | 34  |
| 687  | W | 3 | 16  | 1   |
| 691  | W | 1 | 243 | 153 |
| 691  | M | 1 | 243 | 1   |
| 695  | M | 2 | 6   | 25  |
| 715  | M | 1 | 235 | 167 |
| 722  | M | 2 | 19  | 153 |
| 722  | M | 2 | 18  | 12  |
| 722  | M | 2 | 55  | 2   |
| 767  | W | 2 | 4   | 12  |
| 767  | W | 2 | 3   | 1   |
| 775  | S | 1 | 215 | 151 |
| 785  | W | 2 | 34  | 129 |
| 785  | W | 2 | 22  | 1   |
| 785  | W | 2 | 20  | 1   |
| 825  | M | 3 | 8   | 16  |
| 858  | M | 3 | 5   | 33  |
| 858  | M | 3 | 11  | 1   |
| 881  | S | 2 | 2   | 150 |
| 886  | M | 1 | 178 | 167 |
| 911  | W | 2 | 3   | 135 |
| 911  | W | 2 | 44  | 26  |
| 926  | M | 2 | 39  | 147 |
| 926  | M | 2 | 2   | 8   |
| 942  | W | 3 | 14  | 140 |
| 942  | W | 3 | 42  | 9   |
| 942  | W | 3 | 21  | 4   |
| 942  | W | 3 | 43  | 1   |
| 1007 | W | 2 | 12  | 157 |
| 1037 | S | 2 | 2   | 165 |
| 1093 | M | 1 | 109 | 10  |
| 1139 | S | 2 | 34  | 10  |
| 1139 | S | 2 | 9   | 1   |
| 1240 | M | 1 | 60  | 167 |

|      |   |   |    |     |
|------|---|---|----|-----|
| 1254 | M | 3 | 24 | 123 |
| 1254 | M | 3 | 25 | 7   |
| 1266 | W | 3 | 20 | 157 |
| 1266 | W | 3 | 21 | 7   |
| 1282 | M | 1 | 46 | 167 |
| 1371 | S | 3 | 4  | 27  |

**Table S34. Length and count data for influenza A putative ORFs accompanying Figure S32 (N6).**

| <b>Position</b> | <b>Kozak</b> | <b>Frame</b> | <b>Length</b> | <b>Count</b> |
|-----------------|--------------|--------------|---------------|--------------|
| 1               | W            | 1            | 470           | 1182         |
| 24              | M            | 3            | 40            | 765          |
| 24              | M            | 3            | 29            | 354          |
| 24              | M            | 3            | 43            | 36           |
| 24              | M            | 3            | 69            | 9            |
| 24              | M            | 3            | 32            | 9            |
| 24              | M            | 3            | 52            | 4            |
| 24              | M            | 3            | 84            | 1            |
| 43              | M            | 1            | 456           | 1125         |
| 43              | S            | 1            | 456           | 4            |
| 148             | M            | 1            | 421           | 288          |
| 152             | W            | 2            | 8             | 1011         |
| 152             | M            | 2            | 8             | 24           |
| 152             | S            | 2            | 8             | 4            |
| 152             | W            | 2            | 20            | 4            |
| 223             | M            | 1            | 396           | 101          |
| 247             | M            | 1            | 388           | 748          |
| 288             | M            | 3            | 5             | 405          |
| 288             | M            | 3            | 10            | 337          |
| 288             | M            | 3            | 13            | 207          |
| 288             | M            | 3            | 54            | 70           |
| 288             | M            | 3            | 31            | 69           |
| 288             | M            | 3            | 28            | 64           |
| 288             | M            | 3            | 44            | 12           |
| 288             | M            | 3            | 7             | 7            |
| 288             | M            | 3            | 33            | 7            |
| 311             | M            | 2            | 4             | 812          |
| 311             | M            | 2            | 2             | 327          |
| 311             | M            | 2            | 54            | 1            |
| 332             | M            | 2            | 29            | 691          |
| 332             | M            | 2            | 4             | 219          |
| 332             | M            | 2            | 47            | 81           |
| 332             | M            | 2            | 23            | 13           |
| 369             | W            | 3            | 4             | 595          |
| 369             | W            | 3            | 27            | 27           |
| 380             | W            | 2            | 13            | 513          |
| 380             | W            | 2            | 31            | 80           |
| 380             | W            | 2            | 7             | 5            |
| 391             | M            | 1            | 340           | 1181         |



|     |   |   |     |      |
|-----|---|---|-----|------|
| 431 | M | 2 | 14  | 808  |
| 431 | M | 2 | 15  | 356  |
| 431 | M | 2 | 5   | 4    |
| 437 | M | 2 | 12  | 816  |
| 437 | M | 2 | 13  | 318  |
| 437 | M | 2 | 3   | 4    |
| 449 | W | 2 | 8   | 808  |
| 449 | W | 2 | 9   | 352  |
| 449 | M | 2 | 9   | 1    |
| 487 | S | 1 | 308 | 1179 |
| 487 | M | 1 | 308 | 2    |
| 512 | M | 2 | 3   | 365  |
| 512 | M | 2 | 6   | 313  |
| 512 | M | 2 | 53  | 12   |
| 512 | M | 2 | 34  | 1    |
| 512 | M | 2 | 42  | 1    |
| 525 | M | 3 | 10  | 803  |
| 525 | W | 3 | 24  | 182  |
| 525 | W | 3 | 10  | 65   |
| 525 | W | 3 | 35  | 30   |
| 525 | W | 3 | 25  | 11   |
| 525 | W | 3 | 49  | 6    |
| 525 | W | 3 | 23  | 3    |
| 525 | M | 3 | 5   | 3    |
| 525 | M | 3 | 24  | 2    |
| 525 | W | 3 | 59  | 1    |
| 525 | M | 3 | 23  | 1    |
| 534 | S | 3 | 7   | 446  |
| 534 | M | 3 | 7   | 429  |
| 534 | S | 3 | 21  | 182  |
| 534 | S | 3 | 32  | 31   |
| 534 | S | 3 | 46  | 23   |
| 534 | M | 3 | 22  | 11   |
| 534 | S | 3 | 56  | 5    |
| 534 | S | 3 | 20  | 3    |
| 534 | M | 3 | 2   | 2    |
| 534 | M | 3 | 21  | 2    |
| 534 | S | 3 | 2   | 2    |
| 534 | M | 3 | 20  | 1    |
| 549 | W | 3 | 2   | 817  |
| 549 | M | 3 | 16  | 182  |
| 549 | M | 3 | 2   | 48   |
| 549 | M | 3 | 27  | 38   |

|     |   |   |     |      |
|-----|---|---|-----|------|
| 549 | M | 3 | 41  | 24   |
| 549 | M | 3 | 17  | 11   |
| 549 | M | 3 | 51  | 4    |
| 549 | M | 3 | 15  | 3    |
| 549 | W | 3 | 16  | 2    |
| 549 | W | 3 | 15  | 1    |
| 554 | M | 2 | 39  | 754  |
| 554 | M | 2 | 28  | 130  |
| 554 | M | 2 | 20  | 26   |
| 554 | M | 2 | 31  | 2    |
| 554 | M | 2 | 55  | 1    |
| 557 | S | 2 | 27  | 298  |
| 557 | S | 2 | 38  | 21   |
| 557 | S | 2 | 19  | 19   |
| 557 | S | 2 | 9   | 4    |
| 557 | S | 2 | 10  | 1    |
| 557 | S | 2 | 54  | 1    |
| 557 | S | 2 | 3   | 1    |
| 571 | M | 1 | 280 | 1176 |
| 571 | W | 1 | 280 | 5    |
| 579 | M | 3 | 6   | 199  |
| 579 | M | 3 | 17  | 57   |
| 579 | M | 3 | 41  | 45   |
| 579 | M | 3 | 31  | 27   |
| 579 | M | 3 | 7   | 14   |
| 579 | W | 3 | 6   | 7    |
| 579 | M | 3 | 5   | 6    |
| 579 | W | 3 | 7   | 4    |
| 579 | W | 3 | 17  | 2    |
| 579 | M | 3 | 60  | 2    |
| 583 | W | 1 | 276 | 965  |
| 602 | M | 2 | 23  | 756  |
| 602 | M | 2 | 12  | 369  |
| 602 | M | 2 | 4   | 41   |
| 602 | M | 2 | 15  | 2    |
| 602 | M | 2 | 39  | 1    |
| 626 | S | 2 | 15  | 551  |
| 626 | S | 2 | 4   | 39   |
| 626 | S | 2 | 7   | 2    |
| 626 | M | 2 | 15  | 2    |
| 654 | M | 3 | 16  | 250  |
| 654 | S | 3 | 6   | 233  |
| 654 | S | 3 | 16  | 107  |

|     |   |   |     |      |
|-----|---|---|-----|------|
| 654 | M | 3 | 11  | 93   |
| 654 | S | 3 | 31  | 13   |
| 654 | M | 3 | 29  | 7    |
| 654 | S | 3 | 3   | 4    |
| 654 | S | 3 | 35  | 2    |
| 654 | S | 3 | 11  | 2    |
| 654 | S | 3 | 30  | 1    |
| 654 | M | 3 | 30  | 1    |
| 690 | M | 3 | 4   | 956  |
| 690 | W | 3 | 4   | 134  |
| 690 | M | 3 | 19  | 13   |
| 690 | M | 3 | 17  | 7    |
| 690 | W | 3 | 17  | 6    |
| 690 | M | 3 | 18  | 2    |
| 690 | M | 3 | 23  | 2    |
| 696 | W | 3 | 2   | 826  |
| 696 | W | 3 | 15  | 11   |
| 696 | W | 3 | 17  | 3    |
| 696 | W | 3 | 16  | 3    |
| 696 | W | 3 | 21  | 2    |
| 704 | S | 2 | 6   | 752  |
| 704 | S | 2 | 5   | 32   |
| 704 | S | 2 | 7   | 1    |
| 711 | M | 3 | 11  | 426  |
| 711 | M | 3 | 10  | 370  |
| 711 | M | 3 | 12  | 21   |
| 711 | M | 3 | 6   | 17   |
| 711 | M | 3 | 51  | 4    |
| 711 | M | 3 | 16  | 2    |
| 724 | M | 1 | 229 | 1179 |
| 731 | M | 2 | 11  | 1163 |
| 731 | M | 2 | 25  | 2    |
| 731 | M | 2 | 8   | 1    |
| 815 | M | 2 | 15  | 52   |
| 815 | M | 2 | 13  | 49   |
| 815 | M | 2 | 4   | 11   |
| 815 | M | 2 | 31  | 1    |
| 834 | M | 3 | 10  | 505  |
| 834 | M | 3 | 22  | 223  |
| 834 | M | 3 | 52  | 28   |
| 834 | M | 3 | 30  | 10   |
| 834 | M | 3 | 14  | 4    |
| 834 | M | 3 | 16  | 2    |

|      |   |   |     |      |
|------|---|---|-----|------|
| 834  | M | 3 | 46  | 1    |
| 840  | W | 3 | 8   | 266  |
| 840  | W | 3 | 20  | 148  |
| 840  | W | 3 | 28  | 10   |
| 840  | W | 3 | 44  | 6    |
| 840  | W | 3 | 14  | 3    |
| 840  | W | 3 | 12  | 2    |
| 845  | S | 2 | 5   | 1030 |
| 845  | S | 2 | 21  | 75   |
| 845  | S | 2 | 3   | 49   |
| 859  | M | 1 | 184 | 458  |
| 859  | S | 1 | 184 | 12   |
| 867  | W | 3 | 11  | 800  |
| 867  | W | 3 | 5   | 125  |
| 867  | W | 3 | 3   | 112  |
| 867  | W | 3 | 41  | 97   |
| 867  | W | 3 | 19  | 11   |
| 867  | W | 3 | 35  | 5    |
| 873  | W | 3 | 9   | 227  |
| 873  | W | 3 | 39  | 102  |
| 873  | W | 3 | 17  | 11   |
| 873  | W | 3 | 33  | 6    |
| 873  | W | 3 | 3   | 2    |
| 873  | W | 3 | 38  | 1    |
| 928  | M | 1 | 161 | 336  |
| 931  | M | 1 | 160 | 1172 |
| 931  | W | 1 | 160 | 10   |
| 989  | W | 2 | 11  | 1077 |
| 989  | W | 2 | 3   | 3    |
| 989  | W | 2 | 20  | 1    |
| 1001 | M | 2 | 7   | 297  |
| 1001 | M | 2 | 22  | 1    |
| 1013 | M | 2 | 3   | 1137 |
| 1013 | S | 2 | 3   | 14   |
| 1013 | M | 2 | 12  | 1    |
| 1070 | M | 2 | 10  | 750  |
| 1070 | M | 2 | 21  | 125  |
| 1070 | M | 2 | 6   | 15   |
| 1070 | W | 2 | 10  | 7    |
| 1083 | M | 3 | 6   | 343  |
| 1083 | M | 3 | 14  | 8    |
| 1083 | M | 3 | 2   | 2    |
| 1083 | M | 3 | 5   | 1    |

|      |   |   |    |      |
|------|---|---|----|------|
| 1124 | M | 2 | 3  | 861  |
| 1124 | M | 2 | 2  | 2    |
| 1129 | M | 1 | 94 | 1136 |
| 1145 | W | 2 | 14 | 1173 |
| 1145 | W | 2 | 3  | 6    |
| 1145 | W | 2 | 15 | 1    |
| 1186 | W | 1 | 75 | 109  |
| 1254 | M | 3 | 18 | 577  |
| 1254 | M | 3 | 13 | 96   |
| 1254 | M | 3 | 2  | 20   |
| 1254 | M | 3 | 8  | 5    |
| 1254 | M | 3 | 15 | 3    |
| 1254 | M | 3 | 25 | 1    |
| 1274 | W | 2 | 3  | 1111 |
| 1274 | W | 2 | 20 | 1    |
| 1371 | S | 3 | 4  | 358  |
| 1371 | S | 3 | 7  | 10   |
| 1377 | S | 3 | 2  | 695  |
| 1377 | S | 3 | 5  | 7    |

**Table S35. Length and count data for influenza A putative ORFs accompanying Figure S33 (N7).**

| <b>Position</b> | <b>Kozak</b> | <b>Frame</b> | <b>Length</b> | <b>Count</b> |
|-----------------|--------------|--------------|---------------|--------------|
| 1               | W            | 1            | 470           | 471          |
| 83              | W            | 2            | 3             | 464          |
| 83              | W            | 2            | 9             | 5            |
| 95              | W            | 2            | 5             | 453          |
| 122             | M            | 2            | 11            | 155          |
| 144             | M            | 3            | 12            | 200          |
| 144             | M            | 3            | 24            | 196          |
| 144             | M            | 3            | 17            | 11           |
| 144             | M            | 3            | 7             | 7            |
| 144             | M            | 3            | 23            | 7            |
| 144             | M            | 3            | 18            | 1            |
| 191             | W            | 2            | 19            | 470          |
| 191             | W            | 2            | 14            | 1            |
| 250             | W            | 1            | 387           | 450          |
| 267             | W            | 3            | 3             | 399          |
| 267             | W            | 3            | 10            | 1            |
| 282             | S            | 3            | 13            | 313          |
| 282             | S            | 3            | 5             | 154          |
| 282             | S            | 3            | 7             | 2            |
| 305             | M            | 2            | 2             | 437          |
| 305             | M            | 2            | 10            | 10           |
| 356             | W            | 2            | 6             | 438          |
| 356             | W            | 2            | 37            | 32           |
| 385             | M            | 1            | 342           | 470          |
| 389             | W            | 2            | 26            | 61           |
| 431             | M            | 2            | 12            | 30           |
| 443             | W            | 2            | 8             | 85           |
| 528             | S            | 3            | 7             | 125          |
| 528             | S            | 3            | 4             | 39           |
| 528             | M            | 3            | 4             | 1            |
| 548             | M            | 2            | 6             | 470          |
| 548             | M            | 2            | 3             | 1            |
| 565             | W            | 1            | 282           | 467          |
| 565             | M            | 1            | 282           | 4            |
| 590             | M            | 2            | 17            | 433          |
| 590             | M            | 2            | 6             | 1            |
| 596             | M            | 2            | 15            | 32           |
| 617             | M            | 2            | 8             | 467          |
| 617             | S            | 2            | 8             | 2            |

|     |   |   |     |     |
|-----|---|---|-----|-----|
| 648 | S | 3 | 6   | 465 |
| 648 | S | 3 | 11  | 2   |
| 684 | M | 3 | 13  | 123 |
| 684 | W | 3 | 69  | 120 |
| 684 | M | 3 | 39  | 83  |
| 684 | M | 3 | 70  | 72  |
| 684 | W | 3 | 18  | 33  |
| 684 | W | 3 | 70  | 13  |
| 684 | M | 3 | 29  | 8   |
| 684 | W | 3 | 74  | 7   |
| 684 | W | 3 | 13  | 6   |
| 684 | W | 3 | 62  | 1   |
| 684 | W | 3 | 54  | 1   |
| 690 | W | 3 | 11  | 129 |
| 690 | W | 3 | 67  | 119 |
| 690 | W | 3 | 68  | 87  |
| 690 | W | 3 | 37  | 83  |
| 690 | W | 3 | 16  | 35  |
| 690 | W | 3 | 27  | 8   |
| 690 | W | 3 | 72  | 7   |
| 690 | W | 3 | 52  | 1   |
| 690 | W | 3 | 60  | 1   |
| 698 | S | 2 | 4   | 460 |
| 698 | S | 2 | 5   | 8   |
| 705 | M | 3 | 6   | 129 |
| 705 | M | 3 | 62  | 119 |
| 705 | M | 3 | 63  | 87  |
| 705 | M | 3 | 32  | 83  |
| 705 | M | 3 | 11  | 11  |
| 705 | M | 3 | 22  | 8   |
| 705 | M | 3 | 67  | 7   |
| 705 | M | 3 | 47  | 1   |
| 705 | M | 3 | 55  | 1   |
| 718 | M | 1 | 231 | 471 |
| 725 | M | 2 | 18  | 456 |
| 725 | M | 2 | 19  | 12  |
| 828 | M | 3 | 21  | 144 |
| 828 | M | 3 | 22  | 89  |
| 828 | M | 3 | 6   | 9   |
| 828 | M | 3 | 26  | 9   |
| 828 | M | 3 | 59  | 6   |
| 828 | M | 3 | 14  | 1   |
| 834 | W | 3 | 20  | 269 |

|      |   |   |     |     |
|------|---|---|-----|-----|
| 834  | W | 3 | 19  | 112 |
| 834  | W | 3 | 24  | 7   |
| 834  | W | 3 | 4   | 6   |
| 834  | W | 3 | 12  | 2   |
| 839  | S | 2 | 6   | 465 |
| 839  | S | 2 | 21  | 3   |
| 867  | W | 3 | 9   | 294 |
| 867  | W | 3 | 8   | 148 |
| 867  | W | 3 | 13  | 10  |
| 867  | W | 3 | 46  | 2   |
| 867  | W | 3 | 3   | 1   |
| 916  | M | 1 | 165 | 464 |
| 916  | S | 1 | 165 | 7   |
| 920  | W | 2 | 58  | 275 |
| 920  | W | 2 | 25  | 160 |
| 920  | W | 2 | 47  | 27  |
| 920  | W | 2 | 2   | 2   |
| 920  | W | 2 | 24  | 1   |
| 920  | W | 2 | 54  | 1   |
| 925  | S | 1 | 162 | 468 |
| 925  | M | 1 | 162 | 2   |
| 948  | W | 3 | 6   | 420 |
| 948  | W | 3 | 19  | 18  |
| 994  | M | 1 | 139 | 219 |
| 994  | S | 1 | 139 | 34  |
| 1077 | M | 3 | 14  | 471 |
| 1123 | M | 1 | 96  | 470 |
| 1139 | W | 2 | 15  | 466 |
| 1139 | W | 2 | 3   | 2   |
| 1139 | M | 2 | 15  | 1   |
| 1139 | W | 2 | 9   | 1   |
| 1238 | M | 2 | 14  | 363 |
| 1247 | M | 2 | 11  | 42  |
| 1271 | W | 2 | 3   | 465 |
| 1310 | M | 2 | 8   | 462 |



**Table S36. Length and count data for influenza A putative ORFs accompanying Figure S34 (N8).**

| <b>Position</b> | <b>Kozak</b> | <b>Frame</b> | <b>Length</b> | <b>Count</b> |
|-----------------|--------------|--------------|---------------|--------------|
| 1               | W            | 1            | 470           | 1362         |
| 62              | W            | 2            | 6             | 96           |
| 62              | W            | 2            | 5             | 87           |
| 62              | W            | 2            | 9             | 13           |
| 62              | W            | 2            | 8             | 1            |
| 74              | W            | 2            | 2             | 89           |
| 74              | W            | 2            | 5             | 22           |
| 74              | W            | 2            | 6             | 3            |
| 116             | S            | 2            | 18            | 704          |
| 116             | S            | 2            | 23            | 277          |
| 116             | S            | 2            | 4             | 74           |
| 116             | M            | 2            | 4             | 11           |
| 116             | S            | 2            | 10            | 8            |
| 116             | M            | 2            | 18            | 5            |
| 116             | S            | 2            | 11            | 4            |
| 116             | M            | 2            | 9             | 2            |
| 116             | M            | 2            | 10            | 1            |
| 116             | M            | 2            | 23            | 1            |
| 116             | S            | 2            | 8             | 1            |
| 116             | S            | 2            | 9             | 1            |
| 125             | S            | 2            | 15            | 625          |
| 125             | S            | 2            | 20            | 272          |
| 125             | S            | 2            | 7             | 92           |
| 125             | M            | 2            | 8             | 8            |
| 125             | S            | 2            | 6             | 6            |
| 125             | M            | 2            | 20            | 5            |
| 125             | S            | 2            | 8             | 5            |
| 125             | M            | 2            | 15            | 4            |
| 125             | M            | 2            | 7             | 1            |
| 125             | S            | 2            | 5             | 1            |
| 137             | M            | 2            | 11            | 699          |
| 137             | M            | 2            | 16            | 263          |
| 137             | S            | 2            | 11            | 26           |
| 137             | M            | 2            | 3             | 21           |
| 137             | S            | 2            | 4             | 9            |
| 137             | M            | 2            | 2             | 4            |
| 137             | S            | 2            | 3             | 2            |
| 137             | S            | 2            | 16            | 1            |
| 161             | M            | 2            | 3             | 952          |

|     |   |   |     |      |
|-----|---|---|-----|------|
| 161 | M | 2 | 8   | 281  |
| 161 | M | 2 | 5   | 47   |
| 161 | S | 2 | 3   | 1    |
| 192 | S | 3 | 7   | 839  |
| 192 | M | 3 | 2   | 180  |
| 192 | S | 3 | 4   | 178  |
| 192 | M | 3 | 4   | 102  |
| 192 | S | 3 | 2   | 22   |
| 192 | M | 3 | 7   | 10   |
| 192 | S | 3 | 3   | 2    |
| 192 | S | 3 | 15  | 1    |
| 192 | S | 3 | 26  | 1    |
| 192 | M | 3 | 14  | 1    |
| 206 | W | 2 | 5   | 950  |
| 206 | W | 2 | 14  | 6    |
| 206 | M | 2 | 5   | 2    |
| 233 | M | 2 | 5   | 77   |
| 233 | S | 2 | 5   | 11   |
| 233 | M | 2 | 26  | 2    |
| 236 | W | 2 | 4   | 179  |
| 236 | M | 2 | 4   | 118  |
| 236 | S | 2 | 4   | 20   |
| 236 | W | 2 | 35  | 2    |
| 247 | W | 1 | 388 | 1339 |
| 272 | M | 2 | 13  | 1150 |
| 272 | M | 2 | 24  | 2    |
| 305 | S | 2 | 2   | 497  |
| 305 | S | 2 | 12  | 180  |
| 332 | M | 2 | 4   | 1104 |
| 332 | M | 2 | 3   | 191  |
| 332 | M | 2 | 36  | 4    |
| 332 | M | 2 | 26  | 2    |
| 363 | M | 3 | 6   | 105  |
| 363 | W | 3 | 6   | 76   |
| 378 | M | 3 | 13  | 187  |
| 378 | W | 3 | 12  | 8    |
| 378 | M | 3 | 12  | 5    |
| 416 | W | 2 | 8   | 1103 |
| 416 | W | 2 | 17  | 212  |
| 416 | M | 2 | 8   | 1    |
| 431 | M | 2 | 3   | 934  |
| 431 | M | 2 | 12  | 223  |
| 469 | W | 1 | 314 | 1362 |

|     |   |   |     |      |
|-----|---|---|-----|------|
| 497 | W | 2 | 9   | 909  |
| 497 | W | 2 | 23  | 283  |
| 497 | W | 2 | 27  | 2    |
| 528 | S | 3 | 7   | 507  |
| 528 | S | 3 | 20  | 48   |
| 528 | S | 3 | 35  | 8    |
| 528 | S | 3 | 22  | 7    |
| 528 | S | 3 | 21  | 4    |
| 528 | M | 3 | 7   | 1    |
| 543 | W | 3 | 2   | 960  |
| 543 | M | 3 | 2   | 177  |
| 543 | W | 3 | 15  | 29   |
| 543 | M | 3 | 17  | 4    |
| 543 | M | 3 | 16  | 4    |
| 543 | W | 3 | 30  | 3    |
| 543 | M | 3 | 15  | 2    |
| 548 | M | 2 | 6   | 1215 |
| 548 | M | 2 | 10  | 2    |
| 551 | S | 2 | 5   | 1183 |
| 551 | S | 2 | 9   | 4    |
| 551 | M | 2 | 5   | 1    |
| 561 | S | 3 | 9   | 1012 |
| 561 | S | 3 | 24  | 135  |
| 561 | S | 3 | 11  | 25   |
| 561 | S | 3 | 10  | 24   |
| 561 | M | 3 | 9   | 2    |
| 561 | S | 3 | 27  | 2    |
| 561 | S | 3 | 4   | 1    |
| 565 | W | 1 | 282 | 1298 |
| 565 | M | 1 | 282 | 3    |
| 590 | W | 2 | 4   | 579  |
| 590 | W | 2 | 16  | 457  |
| 590 | W | 2 | 6   | 10   |
| 617 | S | 2 | 7   | 1047 |
| 617 | S | 2 | 16  | 285  |
| 617 | S | 2 | 15  | 8    |
| 617 | S | 2 | 8   | 2    |
| 617 | S | 2 | 12  | 1    |
| 635 | W | 2 | 10  | 66   |
| 635 | W | 2 | 9   | 5    |
| 635 | W | 2 | 2   | 2    |
| 635 | W | 2 | 6   | 1    |
| 648 | M | 3 | 16  | 177  |

|     |   |   |     |      |
|-----|---|---|-----|------|
| 648 | M | 3 | 18  | 5    |
| 648 | M | 3 | 25  | 4    |
| 648 | M | 3 | 40  | 1    |
| 684 | M | 3 | 6   | 1051 |
| 684 | M | 3 | 4   | 179  |
| 684 | M | 3 | 13  | 4    |
| 684 | M | 3 | 28  | 4    |
| 705 | W | 3 | 30  | 441  |
| 705 | W | 3 | 21  | 230  |
| 705 | W | 3 | 11  | 51   |
| 705 | W | 3 | 16  | 5    |
| 705 | W | 3 | 27  | 4    |
| 705 | W | 3 | 19  | 3    |
| 705 | W | 3 | 6   | 2    |
| 705 | W | 3 | 47  | 1    |
| 718 | M | 1 | 231 | 1362 |
| 725 | M | 2 | 19  | 1281 |
| 773 | S | 2 | 3   | 196  |
| 809 | M | 2 | 4   | 1214 |
| 809 | M | 2 | 76  | 74   |
| 809 | M | 2 | 32  | 27   |
| 809 | M | 2 | 33  | 6    |
| 809 | M | 2 | 104 | 2    |
| 809 | W | 2 | 16  | 2    |
| 809 | M | 2 | 16  | 1    |
| 828 | M | 3 | 6   | 873  |
| 828 | M | 3 | 5   | 140  |
| 828 | M | 3 | 8   | 8    |
| 834 | W | 3 | 4   | 914  |
| 834 | W | 3 | 3   | 117  |
| 834 | W | 3 | 6   | 8    |
| 845 | W | 2 | 21  | 912  |
| 845 | W | 2 | 92  | 283  |
| 845 | W | 2 | 64  | 71   |
| 845 | W | 2 | 20  | 45   |
| 845 | W | 2 | 4   | 25   |
| 845 | W | 2 | 57  | 1    |
| 845 | W | 2 | 19  | 1    |
| 845 | W | 2 | 91  | 1    |
| 848 | S | 2 | 63  | 77   |
| 848 | S | 2 | 19  | 24   |
| 848 | S | 2 | 3   | 8    |
| 848 | S | 2 | 20  | 1    |

|      |   |   |     |      |
|------|---|---|-----|------|
| 861  | M | 3 | 3   | 748  |
| 861  | M | 3 | 11  | 146  |
| 861  | M | 3 | 34  | 12   |
| 861  | M | 3 | 41  | 5    |
| 861  | M | 3 | 19  | 3    |
| 861  | W | 3 | 3   | 1    |
| 861  | M | 3 | 23  | 1    |
| 867  | W | 3 | 9   | 178  |
| 867  | W | 3 | 3   | 3    |
| 945  | W | 3 | 6   | 450  |
| 945  | W | 3 | 13  | 255  |
| 945  | W | 3 | 5   | 17   |
| 945  | W | 3 | 21  | 8    |
| 945  | W | 3 | 40  | 1    |
| 945  | W | 3 | 48  | 1    |
| 983  | M | 2 | 18  | 100  |
| 983  | S | 2 | 46  | 5    |
| 983  | M | 2 | 11  | 1    |
| 994  | M | 1 | 139 | 103  |
| 1002 | M | 3 | 2   | 912  |
| 1002 | W | 3 | 7   | 160  |
| 1002 | W | 3 | 2   | 84   |
| 1002 | M | 3 | 12  | 32   |
| 1002 | W | 3 | 21  | 22   |
| 1002 | W | 3 | 12  | 2    |
| 1002 | M | 3 | 21  | 1    |
| 1002 | M | 3 | 29  | 1    |
| 1015 | M | 1 | 132 | 1104 |
| 1031 | S | 2 | 30  | 966  |
| 1031 | S | 2 | 2   | 111  |
| 1031 | S | 2 | 15  | 16   |
| 1031 | S | 2 | 49  | 3    |
| 1031 | S | 2 | 53  | 1    |
| 1031 | S | 2 | 29  | 1    |
| 1064 | M | 2 | 19  | 1040 |
| 1064 | M | 2 | 18  | 39   |
| 1064 | M | 2 | 4   | 24   |
| 1064 | M | 2 | 42  | 1    |
| 1064 | M | 2 | 14  | 1    |
| 1067 | M | 2 | 18  | 1008 |
| 1067 | W | 2 | 18  | 91   |
| 1067 | M | 2 | 3   | 24   |
| 1067 | W | 2 | 17  | 9    |

|      |   |   |     |      |
|------|---|---|-----|------|
| 1067 | W | 2 | 9   | 5    |
| 1067 | M | 2 | 17  | 4    |
| 1067 | M | 2 | 37  | 3    |
| 1067 | M | 2 | 41  | 1    |
| 1071 | M | 3 | 6   | 1096 |
| 1071 | M | 3 | 14  | 169  |
| 1071 | M | 3 | 7   | 1    |
| 1075 | M | 1 | 112 | 1139 |
| 1133 | S | 2 | 19  | 673  |
| 1133 | S | 2 | 15  | 331  |
| 1133 | S | 2 | 14  | 195  |
| 1133 | S | 2 | 10  | 94   |
| 1133 | S | 2 | 34  | 32   |
| 1133 | S | 2 | 16  | 6    |
| 1133 | S | 2 | 9   | 2    |
| 1133 | S | 2 | 3   | 1    |
| 1133 | S | 2 | 32  | 1    |
| 1133 | S | 2 | 11  | 1    |
| 1184 | W | 2 | 17  | 103  |
| 1184 | W | 2 | 2   | 2    |
| 1184 | W | 2 | 31  | 1    |
| 1248 | M | 3 | 8   | 178  |
| 1248 | W | 3 | 8   | 1    |
| 1260 | W | 3 | 4   | 999  |
| 1260 | W | 3 | 20  | 5    |
| 1276 | M | 1 | 45  | 1357 |
| 1276 | S | 1 | 45  | 1    |
| 1308 | S | 3 | 4   | 878  |
| 1308 | S | 3 | 3   | 188  |
| 1308 | M | 3 | 4   | 121  |
| 1308 | S | 3 | 14  | 60   |
| 1308 | S | 3 | 29  | 1    |
| 1333 | M | 1 | 26  | 1362 |
| 1368 | S | 3 | 9   | 854  |
| 1368 | S | 3 | 12  | 4    |
| 1368 | S | 3 | 5   | 2    |
| 1368 | S | 3 | 2   | 2    |
| 1368 | S | 3 | 3   | 1    |

**Table S37. Length and count data for influenza A putative ORFs accompanying Figure S35 (N9).**

| <b>Position</b> | <b>Kozak</b> | <b>Frame</b> | <b>Length</b> | <b>Count</b> |
|-----------------|--------------|--------------|---------------|--------------|
| 1               | W            | 1            | 470           | 421          |
| 24              | W            | 3            | 40            | 333          |
| 24              | W            | 3            | 33            | 42           |
| 24              | W            | 3            | 54            | 33           |
| 24              | W            | 3            | 36            | 5            |
| 24              | W            | 3            | 31            | 2            |
| 24              | W            | 3            | 51            | 1            |
| 24              | W            | 3            | 29            | 1            |
| 24              | W            | 3            | 55            | 1            |
| 155             | W            | 2            | 5             | 227          |
| 155             | M            | 2            | 5             | 26           |
| 188             | M            | 2            | 7             | 303          |
| 188             | M            | 2            | 2             | 1            |
| 229             | M            | 1            | 394           | 360          |
| 291             | M            | 3            | 28            | 208          |
| 291             | M            | 3            | 31            | 118          |
| 291             | M            | 3            | 10            | 55           |
| 291             | M            | 3            | 16            | 7            |
| 291             | M            | 3            | 7             | 1            |
| 302             | M            | 2            | 6             | 325          |
| 302             | M            | 2            | 15            | 64           |
| 314             | M            | 2            | 2             | 353          |
| 314             | M            | 2            | 11            | 65           |
| 341             | W            | 2            | 2             | 370          |
| 341             | W            | 2            | 45            | 11           |
| 341             | W            | 2            | 3             | 1            |
| 365             | W            | 2            | 37            | 396          |
| 365             | W            | 2            | 19            | 12           |
| 365             | W            | 2            | 38            | 6            |
| 365             | W            | 2            | 13            | 5            |
| 372             | W            | 3            | 4             | 118          |
| 383             | W            | 2            | 31            | 395          |
| 383             | W            | 2            | 13            | 7            |
| 383             | W            | 2            | 32            | 6            |
| 383             | W            | 2            | 7             | 5            |
| 383             | M            | 2            | 13            | 4            |
| 383             | M            | 2            | 31            | 2            |
| 387             | W            | 3            | 23            | 107          |
| 387             | W            | 3            | 22            | 13           |

|     |   |   |     |     |
|-----|---|---|-----|-----|
| 387 | W | 3 | 6   | 7   |
| 387 | W | 3 | 12  | 5   |
| 398 | W | 2 | 26  | 397 |
| 398 | W | 2 | 8   | 12  |
| 398 | W | 2 | 27  | 6   |
| 398 | W | 2 | 2   | 5   |
| 440 | M | 2 | 12  | 304 |
| 452 | W | 2 | 8   | 25  |
| 452 | W | 2 | 9   | 4   |
| 528 | M | 3 | 7   | 357 |
| 528 | M | 3 | 10  | 9   |
| 528 | M | 3 | 5   | 2   |
| 537 | M | 3 | 4   | 50  |
| 537 | M | 3 | 7   | 13  |
| 557 | M | 2 | 20  | 399 |
| 557 | M | 2 | 39  | 9   |
| 560 | S | 2 | 19  | 407 |
| 560 | S | 2 | 38  | 10  |
| 574 | M | 1 | 279 | 412 |
| 574 | W | 1 | 279 | 9   |
| 582 | M | 3 | 16  | 275 |
| 582 | M | 3 | 23  | 104 |
| 582 | M | 3 | 6   | 13  |
| 582 | M | 3 | 36  | 9   |
| 582 | W | 3 | 23  | 6   |
| 582 | W | 3 | 36  | 4   |
| 582 | M | 3 | 15  | 4   |
| 582 | M | 3 | 7   | 3   |
| 582 | M | 3 | 28  | 1   |
| 582 | W | 3 | 5   | 1   |
| 582 | M | 3 | 5   | 1   |
| 605 | M | 2 | 4   | 406 |
| 605 | M | 2 | 23  | 9   |
| 621 | S | 3 | 10  | 71  |
| 621 | S | 3 | 15  | 1   |
| 657 | M | 3 | 11  | 322 |
| 657 | M | 3 | 2   | 11  |
| 657 | M | 3 | 3   | 1   |
| 657 | M | 3 | 40  | 1   |
| 657 | M | 3 | 55  | 1   |
| 693 | W | 3 | 28  | 207 |
| 693 | W | 3 | 43  | 178 |
| 693 | W | 3 | 4   | 17  |



|     |   |   |     |     |
|-----|---|---|-----|-----|
| 693 | W | 3 | 46  | 5   |
| 693 | W | 3 | 13  | 4   |
| 693 | W | 3 | 21  | 4   |
| 699 | W | 3 | 26  | 202 |
| 699 | W | 3 | 41  | 162 |
| 699 | W | 3 | 2   | 17  |
| 699 | W | 3 | 11  | 6   |
| 699 | W | 3 | 44  | 5   |
| 699 | W | 3 | 19  | 4   |
| 707 | S | 2 | 5   | 26  |
| 707 | S | 2 | 34  | 3   |
| 707 | S | 2 | 29  | 3   |
| 714 | W | 3 | 36  | 113 |
| 714 | M | 3 | 6   | 10  |
| 714 | W | 3 | 39  | 5   |
| 714 | W | 3 | 14  | 4   |
| 714 | W | 3 | 21  | 2   |
| 714 | M | 3 | 39  | 1   |
| 734 | M | 2 | 20  | 407 |
| 734 | M | 2 | 19  | 2   |
| 734 | M | 2 | 14  | 1   |
| 798 | S | 3 | 8   | 387 |
| 798 | S | 3 | 11  | 16  |
| 798 | M | 3 | 11  | 9   |
| 798 | S | 3 | 29  | 3   |
| 798 | M | 3 | 8   | 2   |
| 837 | M | 3 | 16  | 299 |
| 837 | M | 3 | 22  | 91  |
| 837 | M | 3 | 14  | 17  |
| 843 | W | 3 | 14  | 310 |
| 843 | W | 3 | 20  | 77  |
| 843 | W | 3 | 12  | 7   |
| 848 | S | 2 | 21  | 40  |
| 848 | S | 2 | 6   | 9   |
| 848 | S | 2 | 4   | 1   |
| 876 | W | 3 | 3   | 120 |
| 876 | W | 3 | 9   | 74  |
| 934 | M | 1 | 159 | 420 |
| 934 | S | 1 | 159 | 1   |
| 957 | W | 3 | 12  | 127 |
| 957 | W | 3 | 7   | 2   |
| 992 | W | 2 | 4   | 195 |
| 992 | W | 2 | 32  | 10  |

|      |   |   |    |     |
|------|---|---|----|-----|
| 1016 | M | 2 | 24 | 258 |
| 1016 | M | 2 | 17 | 33  |
| 1016 | M | 2 | 11 | 3   |
| 1016 | S | 2 | 24 | 1   |
| 1016 | M | 2 | 28 | 1   |
| 1043 | S | 2 | 15 | 280 |
| 1043 | S | 2 | 8  | 51  |
| 1043 | S | 2 | 19 | 6   |
| 1043 | S | 2 | 2  | 4   |
| 1070 | M | 2 | 6  | 404 |
| 1070 | M | 2 | 10 | 11  |
| 1070 | W | 2 | 6  | 2   |
| 1124 | M | 2 | 3  | 142 |
| 1129 | M | 1 | 94 | 418 |
| 1145 | W | 2 | 2  | 419 |
| 1157 | W | 2 | 13 | 135 |
| 1157 | W | 2 | 42 | 5   |
| 1157 | W | 2 | 11 | 5   |
| 1157 | W | 2 | 10 | 3   |
| 1231 | M | 1 | 60 | 395 |
| 1254 | M | 3 | 24 | 47  |
| 1254 | M | 3 | 15 | 7   |
| 1254 | M | 3 | 25 | 3   |
| 1254 | M | 3 | 18 | 2   |
| 1254 | M | 3 | 2  | 2   |
| 1266 | M | 3 | 14 | 23  |
| 1266 | M | 3 | 4  | 11  |
| 1266 | M | 3 | 21 | 11  |
| 1266 | M | 3 | 20 | 2   |
| 1274 | W | 2 | 3  | 181 |
| 1314 | S | 3 | 4  | 202 |
| 1314 | S | 3 | 5  | 76  |
| 1314 | S | 3 | 3  | 1   |
| 1342 | W | 1 | 23 | 421 |
| 1371 | S | 3 | 4  | 384 |
| 1371 | S | 3 | 7  | 11  |
| 1385 | M | 2 | 4  | 421 |

**Table S38. Length and count data for influenza A putative ORFs accompanying Figure S36 (N10).**

| <b>Position</b> | <b>Kozak</b> | <b>Frame</b> | <b>Length</b> | <b>Count</b> |
|-----------------|--------------|--------------|---------------|--------------|
| 1               | W            | 1            | 442           | 3            |
| 21              | M            | 3            | 38            | 2            |
| 21              | M            | 3            | 47            | 1            |
| 50              | W            | 2            | 2             | 2            |
| 58              | M            | 1            | 423           | 3            |
| 79              | W            | 1            | 416           | 3            |
| 96              | M            | 3            | 13            | 2            |
| 96              | M            | 3            | 22            | 1            |
| 161             | W            | 2            | 6             | 3            |
| 250             | W            | 1            | 359           | 3            |
| 341             | W            | 2            | 5             | 1            |
| 424             | S            | 1            | 301           | 3            |
| 429             | S            | 3            | 42            | 1            |
| 490             | M            | 1            | 279           | 3            |
| 519             | M            | 3            | 12            | 3            |
| 537             | S            | 3            | 6             | 3            |
| 557             | M            | 2            | 8             | 3            |
| 583             | M            | 1            | 248           | 3            |
| 593             | S            | 2            | 4             | 3            |
| 660             | M            | 3            | 13            | 3            |
| 737             | W            | 2            | 13            | 3            |
| 749             | S            | 2            | 9             | 2            |
| 765             | S            | 3            | 11            | 2            |
| 860             | M            | 2            | 18            | 3            |
| 863             | M            | 2            | 17            | 3            |
| 926             | S            | 2            | 53            | 2            |
| 926             | S            | 2            | 11            | 1            |
| 979             | S            | 1            | 116           | 3            |
| 1073            | S            | 2            | 4             | 3            |
| 1136            | M            | 2            | 33            | 3            |
| 1261            | M            | 1            | 22            | 3            |

**Table S39.Length and count data for influenza A putative ORFs accompanying Figure S37 (N11).**

| <b>Position</b> | <b>Kozak</b> | <b>Frame</b> | <b>Length</b> | <b>Count</b> |
|-----------------|--------------|--------------|---------------|--------------|
| 1               | W            | 1            | 447           | 1            |
| 21              | M            | 3            | 35            | 1            |
| 45              | M            | 3            | 27            | 1            |
| 96              | S            | 3            | 10            | 1            |
| 182             | W            | 2            | 5             | 1            |
| 290             | M            | 2            | 21            | 1            |
| 341             | W            | 2            | 4             | 1            |
| 349             | W            | 1            | 331           | 1            |
| 412             | S            | 1            | 310           | 1            |
| 463             | W            | 1            | 293           | 1            |
| 467             | W            | 2            | 4             | 1            |
| 551             | M            | 2            | 16            | 1            |
| 554             | S            | 2            | 15            | 1            |
| 611             | M            | 2            | 4             | 1            |
| 647             | M            | 2            | 4             | 1            |
| 684             | W            | 3            | 2             | 1            |
| 689             | M            | 2            | 24            | 1            |
| 692             | S            | 2            | 23            | 1            |
| 719             | M            | 2            | 14            | 1            |
| 767             | M            | 2            | 28            | 1            |
| 855             | M            | 3            | 8             | 1            |
| 878             | M            | 2            | 53            | 1            |
| 881             | M            | 2            | 52            | 1            |
| 939             | M            | 3            | 12            | 1            |
| 1036            | W            | 1            | 102           | 1            |
| 1211            | W            | 2            | 27            | 1            |
| 1286            | W            | 2            | 2             | 1            |
| 1321            | W            | 1            | 7             | 1            |

**Table S40. An abridged ORF list of influenza HA and NA genes.**

| <b>Gene</b> | <b>Position (Frame)</b> | <b>Dominant length (aa)</b> | <b>Prevalence (%)</b> |
|-------------|-------------------------|-----------------------------|-----------------------|
| H1          | 311 (2)                 | 14                          | 95.4                  |
|             | 498 (3)                 | 3                           | 82.1                  |
| H2          | 158 (2)                 | 6                           | 78.42                 |
|             | 481 (1)                 | 402                         | 99.79                 |
| H3          | 278 (2)                 | 34                          | 90.8                  |
|             | 297 (3)                 | 5                           | 78.29                 |
|             | 446 (2)                 | 18                          | 53.84                 |
| H4          | 109 (1)                 | 528                         | 99.23                 |
|             | 285 (3)                 | 17                          | 72.72                 |
|             | 380 (2)                 | 29                          | 76.9                  |
|             | 434 (2)                 | 11                          | 96.92                 |
|             | 551 (2)                 | 31                          | 68.98                 |
| H5          | 106 (1)                 | 533                         | 99.8                  |
|             | 273 (3)                 | 12                          | 93.4                  |
|             | 492 (3)                 | 17                          | 91.07                 |
| H6          | 308 (2)                 | 8                           | 96.87                 |
| H7          | 391 (1)                 | 430                         | 99.33                 |
| H8          | 139 (1)                 | 520                         | 100                   |
|             | 557 (2)                 | 28                          | 91.3                  |
| H9          | 167 (2)                 | 14                          | 86.36                 |
|             | 480 (3)                 | 18                          | 57.88                 |
| H10         | 226 (1)                 | 486                         | 98.62                 |
|             | 270 (3)                 | 21                          | 75.83                 |
|             | 358 (1)                 | 442                         | 100                   |
|             | 449 (2)                 | 9                           | 75.64                 |
| H11         | 273 (3)                 | 22                          | 63.87                 |
|             | 487 (1)                 | 403                         | 99.74                 |
| H12         | 276 (3)                 | 20                          | 76.61                 |
|             | 307 (1)                 | 462                         | 97.58                 |
|             | 492 (3)                 | 14                          | 92.74                 |
| H13         | 119 (2)                 | 10                          | 76.32                 |
|             | 231 (3)                 | 21                          | 55.26                 |
|             | 347 (2)                 | 18                          | 57.89                 |
| H14         | 431 (2)                 | 12                          | 100                   |
|             | 482 (2)                 | 6                           | 54.55                 |
|             | 533 (2)                 | 41                          | 100                   |
| H15         | 477 (3)                 | 7                           | 100                   |
| H16         | 122 (2)                 | 4                           | 67.74                 |
|             | 350 (2)                 | 10                          | 100                   |
| H17         | 167 (2)                 | 6                           | 66.67                 |

|     |         |     |       |
|-----|---------|-----|-------|
|     | 279 (3) | 7   | 100   |
| H18 | 155 (2) | 6   | 100   |
|     | 302 (2) | 11  | 100   |
| N1  | 96 (3)  | 2   | 94.31 |
| N3  | 437 (2) | 12  | 98    |
| N4  | 96 (3)  | 2   | 76.6  |
|     | 308 (2) | 30  | 93.09 |
| N5  | 302 (2) | 13  | 81.44 |
| N7  | 282 (3) | 13  | 66.45 |
| N8  | 116 (2) | 18  | 52.06 |
|     | 192 (3) | 7   | 62.33 |
| N10 | 424 (1) | 301 | 100   |
| N11 | 96 (3)  | 10  | 100   |
|     | 412 (1) | 310 | 100   |

The filtering criteria used in Table 2, strong Kozak consensus sequence, an upstream AUG location within the upstream third of the transcript and high prevalence ( $\geq 95\%$  and  $\geq 50\%$  for in-frame and alternative-frame ORFs, respectively), were applied to obtain the most probable HA and NA ORF candidates from Figs. S9–S37 (Tables S11–S39). Because some of the genes have multiple frame-2 or frame-3 ORFs, we did not name the ORFs according to Table 2. Instead, their starting positions are provided for identification purposes.

**Table S41. HHblits hits against PDB database for alternative-frame ORFs.**

| Query (Count) / Frame No.                                                                                                                                             | Avg. E-value  | Avg. identity (%) | Avg. prob. (%) |
|-----------------------------------------------------------------------------------------------------------------------------------------------------------------------|---------------|-------------------|----------------|
| <b>PDB ID: Definition / Classification / Organism / Molecule Name</b>                                                                                                 |               |                   |                |
| <b>One representative alignment</b>                                                                                                                                   |               |                   |                |
| N4-381 (4) / Frame-3                                                                                                                                                  | 1.20E-04      | 75.0              | 95.5           |
| 1EYO: Solution structure of conotoxin tviaa from conus tulipa / Toxin / Conus tulipa / Conotoxin tviaa                                                                |               |                   |                |
| N4-381                                                                                                                                                                | 6 LDSRCPPQ    | 13 (13)           |                |
| Consensus                                                                                                                                                             | 6 ldsrppq     | 13 (13)           |                |
|                                                                                                                                                                       | -             |                   |                |
| Consensus                                                                                                                                                             | 5 r~srcpp~    | 12 (30)           |                |
| 1EYO                                                                                                                                                                  | 5 RDSRCPPV    | 12 (30)           |                |
| NP-987 (1) / Frame-3                                                                                                                                                  | 1.50E-07      | 75.0              | 97.3           |
| <sup>a</sup> 1CLV: yellow meal worm alpha-amylase in complex with the amaranth alpha-amylase inhibitor / Hydrolase / Tenebrio molitor / protein (alpha-amylase)       |               |                   |                |
| NP-987                                                                                                                                                                | 1 MDGMPCCS    | 8 (9)             |                |
| Consensus                                                                                                                                                             | 1 mdg~pcc~    | 8 (9)             |                |
|                                                                                                                                                                       | +   +         |                   |                |
| Consensus                                                                                                                                                             | 12 mdgvpcc    | 19 (32)           |                |
| 1CLV                                                                                                                                                                  | 12 MDGVPCCE   | 19 (32)           |                |
| N7-684 (6) / Frame-3                                                                                                                                                  | 7.65E-10      | 55.0              | 98.1           |
| <sup>a</sup> 1CLV: (Same as above)                                                                                                                                    |               |                   |                |
| N7-684                                                                                                                                                                | 2 CMPQWNMCGNN | 12 (13)           |                |
| Consensus                                                                                                                                                             | 2 c~p~wn~cg~n | 12 (13)           |                |
|                                                                                                                                                                       | +     . .     |                   |                |
| Consensus                                                                                                                                                             | 1 cipkwnrcgpk | 11 (32)           |                |
| 1CLV                                                                                                                                                                  | 1 CIPKWNRCGPK | 11 (32)           |                |
| PB1-1995 (1) / Frame-3                                                                                                                                                | 8.70E-09      | 50.0              | 97.8           |
| 4KT3: Structure of a type VI secretion system effector-immunity complex from Pseudomonas protegens / Hydrolase / Pseudomonas protegens Pf-5 / Uncharacterized protein |               |                   |                |

|                      |    |                |      |       |
|----------------------|----|----------------|------|-------|
| PB1-1995             | 1  | MDPQGKPFHPQYQP | 14   | (18)  |
| Consensus            | 1  | ~D~qGkpfHpgYy~ | 14   | (18)  |
|                      |    | +       .      |      |       |
| Consensus            | 51 | ~d~~G~p~hpGyy~ | 64   | (137) |
| 4KT3                 | 51 | QDENGKPPHPGYD  | 64   | (137) |
| NS1-50 (6) / Frame-2 |    | 6.87E-09       | 37.0 | 97.8  |

3IJW: Crystal structure of BA2930 in complex with CoA / Transferase / Bacillus anthracis str. Ames / Aminoglycoside N3-acetyltransferase

|                      |    |                     |      |       |
|----------------------|----|---------------------|------|-------|
| NS1-50               | 1  | MSANGLQTGDLVMLHSSTG | 19   | (26)  |
| Consensus            | 1  | L~~LGI~~Gd~llVHsSl~ | 19   | (26)  |
|                      |    | +++   ++  +   .     |      |       |
| Consensus            | 24 | L~~LGi~~Gd~llVHsSl~ | 42   | (268) |
| 3IJW                 | 24 | LRKLGLKKGMTVIVHSSLS | 42   | (268) |
| H3-161 (1) / Frame-2 |    | 2.40E-04            | 44.0 | 95.0  |

3G9R: Structure of the HIV-1 gp41 Membrane-Proximal Ectodomain Region in a Putative Prefusion Conformation / Viral Protein / Saccharomyces cerevisiae Human immunodeficiency virus 1 / Fusion complex of HIV-1 Envelope glycoprotein and Saccharomyces cerevisiae General control protein GCN4

|                       |   |                    |      |      |
|-----------------------|---|--------------------|------|------|
| H3-161                | 2 | LQNWFRISQWVKYARILI | 19   | (28) |
| Consensus             | 2 | lqnwfrisqwvkyarili | 19   | (28) |
|                       |   | .   . .+. . -+ .+  |      |      |
| Consensus             | 8 | LWnWFdIT~WlwYIKIfi | 25   | (42) |
| 3G9R                  | 8 | LWNWFNITNWLWYIKIEE | 25   | (42) |
| H13-623 (5) / Frame-2 |   | 1.60E-07           | 43.0 | 97.2 |

2WM1: the crystal structure of human alpha-amino-beta-carboxymuconate-epsilon-semialdehyde decarboxylase in complex with 1,3- dihydroxyacetonephosphate suggests a regulatory link between nad synthesis and glycolysis / Lyase / Homo sapiens / 2-amino-3-carboxymuconate-6-semialdehyde decarboxylase

|           |   |                |    |      |
|-----------|---|----------------|----|------|
| H13-623   | 1 | MSIVIHTHWFPSSL | 14 | (20) |
| Consensus | 1 | MiID~H~Hi~pp~~ | 14 | (20) |
|           |   | +  + + ++  ++  |    |      |



|                                                                                                                                                                                             |    |                |      |       |
|---------------------------------------------------------------------------------------------------------------------------------------------------------------------------------------------|----|----------------|------|-------|
| Consensus                                                                                                                                                                                   | 1  | m-ID~H~H~~p~~~ | 14   | (336) |
| 2WM1                                                                                                                                                                                        | 1  | MKIDIHSHILPKEW | 14   | (336) |
| H5-1479 (5), H6-1473 (1) /                                                                                                                                                                  |    |                |      |       |
| Frame-3                                                                                                                                                                                     |    | 6.50E-09       | 40.0 | 97.8  |
| 2DCV: The solution structure of horseshoe crab antimicrobial peptide tachystatin b with the inhibitory cystine-knot motif / Antimicrobial Protein / Tachypleus tridentatus / Tachystatin-B1 |    |                |      |       |
| H6-1473                                                                                                                                                                                     | 1  | MYGVCQKRNL     | 10   | (10)  |
| Consensus                                                                                                                                                                                   | 1  | ~yG~Cqrrn~     | 10   | (10)  |
|                                                                                                                                                                                             |    | +              |      |       |
| Consensus                                                                                                                                                                                   | 33 | i~g~c~r~~~     | 42   | (42)  |
| 2DCV                                                                                                                                                                                        | 33 | IFGTCSRRNF     | 42   | (42)  |
| PB1-1737 (6) / Frame-3                                                                                                                                                                      |    |                |      |       |
|                                                                                                                                                                                             |    | 1.30E-09       | 36.0 | 98.0  |
| 4A1S: Crystallographic structure of the Pins:Insc complex / Cell Cycle / Drosophila melanogaster / PARTNER OF INSCUTEABLE                                                                   |    |                |      |       |
| PB1-1737                                                                                                                                                                                    | 3  | ANPFQSWAAGLRWR | 16   | (17)  |
| Consensus                                                                                                                                                                                   | 3  | ~~pvqsWl~eqRw~ | 16   | (17)  |
|                                                                                                                                                                                             |    | -+     +    +  |      |       |
| Consensus                                                                                                                                                                                   | 7  | ~~~v~sWl~eqRw~ | 20   | (40)  |
| 4ALS                                                                                                                                                                                        | 7  | PEPVASWMSEQRWA | 20   | (40)  |
| NS1-86 (1) / Frame-2                                                                                                                                                                        |    |                |      |       |
|                                                                                                                                                                                             |    | 2.40E-07       | 36.0 | 97.2  |
| 2LI5: NMR structure of Atg8-Atg7C30 complex / Protein Transport / Saccharomyces cerevisiae S288c / Autophagy-related protein 8                                                              |    |                |      |       |
| NS1-86                                                                                                                                                                                      | 2  | PHFLCGFAEIR    | 12   | (14)  |
| Consensus                                                                                                                                                                                   | 2  | PH~i~G~s~Ir    | 12   | (14)  |
|                                                                                                                                                                                             |    | ++++           |      |       |
| Consensus                                                                                                                                                                                   | 2  | ~~~LSGL~~vq    | 12   | (34)  |
| 2LI5                                                                                                                                                                                        | 2  | PHMISGLSVIK    | 12   | (34)  |
| PB1-993 (3) / Frame-3                                                                                                                                                                       |    |                |      |       |
|                                                                                                                                                                                             |    | 3.30E-06       | 15.0 | 96.6  |
| 1ROF: Crystal Structure of the Ferredoxin from Thauera aromatica / Electron Transport / Thauera aromatica K172 / ferredoxin                                                                 |    |                |      |       |
| PB1-993                                                                                                                                                                                     | 3  | QKCLEHCPYNVLK  | 15   | (15)  |

|                                                                                                                      |    |                                         |      |       |
|----------------------------------------------------------------------------------------------------------------------|----|-----------------------------------------|------|-------|
| Consensus                                                                                                            | 3  | ~~C~~~CP~~ai~                           | 15   | (15)  |
|                                                                                                                      |    | + .  +++   ++   +                       |      |       |
| Consensus                                                                                                            | 45 | ~~C~~~CP~~Ai~                           | 57   | (60)  |
| 1ROF                                                                                                                 | 45 | KDAADSCPTGAIS                           | 57   | (60)  |
| <sup>b</sup> N2-831 (6) / Frame-3                                                                                    |    | 9.90E-05                                | 14.0 | 95.3  |
| 1TP9: PRX D (type II) / Oxidoreductase / Populus trichocarpa / Peroxiredoxin                                         |    |                                         |      |       |
| N2-831                                                                                                               | 4  | LSPISWCQMCLQRQLERLQQAHRRYKFK            | 31   | (33)  |
| Consensus                                                                                                            | 4  | lspiswcqmclqrqlerlqqahrrykfk            | 31   | (33)  |
|                                                                                                                      |    | ..   -+     ..   ..+++..   ++...+   +-+ |      |       |
| Consensus                                                                                                            | 42 | f~~~~~C~~C~~~~~l~~~~~                   | 69   | (162) |
| 1TP9                                                                                                                 | 42 | GVPGAFTPTCSLKHVPGFIEKAGELKSK            | 69   | (162) |
| <sup>b</sup> N2-831 (1) / Frame-3                                                                                    |    | 1.70E-04                                | 14.0 | 95.0  |
| 2R37: Crystal structure of human glutathione peroxidase 3 / Oxidoreductase / Homo sapiens / Glutathione peroxidase 3 |    |                                         |      |       |
| N2-831                                                                                                               | 3  | LLSSISWCQMCLQRQLERLQSAHRRYKHKG          | 32   | (33)  |
| Consensus                                                                                                            | 3  | llssiswcqmclqrqlerlqsahrrykhkg          | 32   | (33)  |
|                                                                                                                      |    | +...-+     ..   . ++..   +....+   +.+   |      |       |
| Consensus                                                                                                            | 43 | l~F~at~C~~C~~~l~~l~~~~~                 | 70   | (207) |
| 2R37                                                                                                                 | 43 | FVNVASYGGLT-G-QYIELNALQEELAPFG          | 70   | (207) |

This table supplements Table 4 for the hits of structural homologues to all frame-2 and -3 influenza A novel ORFs. E-value, sequence identity and probability were provided by averaging ones from HHblits hits. The alignments between putative ORFs and structures were generated by HHblits tool. The number in parenthesis following a sequence alignment is the length of either query or subject. Consensus sequences are shown in HMM format for both the query and the subject, in which capital and lowercase letters are used to represent conserved columns with  $\geq 60$  and  $\geq 40$  probabilities, respectively, and a tilde “~” is used to represent non-conserved column. Based on default settings with two iterations, HHblits tool adds significant hit(s) from the previous search/iteration to the HMM query for the next search/iteration. It results to that our query may not be single sequence. Five symbols are used to show the alignment quality, in which “|”, “+”, “.”, “-” and “=” each represents a quality from the perfect to the worst.

<sup>a</sup> Two groups of putative ORFs from NP and N7 genes hit to 1CLV structure.

<sup>b</sup> One putative ORF, N2-281, hits to different structures.
