# Supplementary material for: Computational Analysis and Mapping of Novel Open Reading Frames in Influenza A Viruses
Source: PubMed Central journal article supplement (PMC4266615; doi:10.1371/journal.pone.0115016), 2014-12-15
Supplement: pone.0115016.s002.pdf [file pone.0115016.s002.pdf]

**Figures S1–S37. ORF maps of PB2, NP, M1, M2, M42, NS1, NS2, NS3, H1–H18 and N1–N11 transcripts.** Symbols and legends used are as defined in Figure 1. Briefly, the putative ORFs are graphed in 3 forward-reading frames: F1, F2 and F3. Each colored box represents the start codon of an ORF, with red, green and blue indicating strong, medium and weak Kozak sequences, respectively. Numbers from 1 indicate the positions of start codons. For ORFs with mixed populations of different Kozak strengths, multiple colors indicate the population proportions. F2 and F3 ORFs of major prevalence (>50%) are additionally labelled by their frequencies. ORFs of lower prevalence (<95% for F1, <50% for F2/F3) are grey-labelled. Each ORF ends with a solid line. For F2/F3 ORFs of various sizes, the corresponding dominant length is used to close the ORF. For overlapping ORFs, an asterisk (\*) accompanying the start position is additionally labelled in grey to mark the end of the ORF.

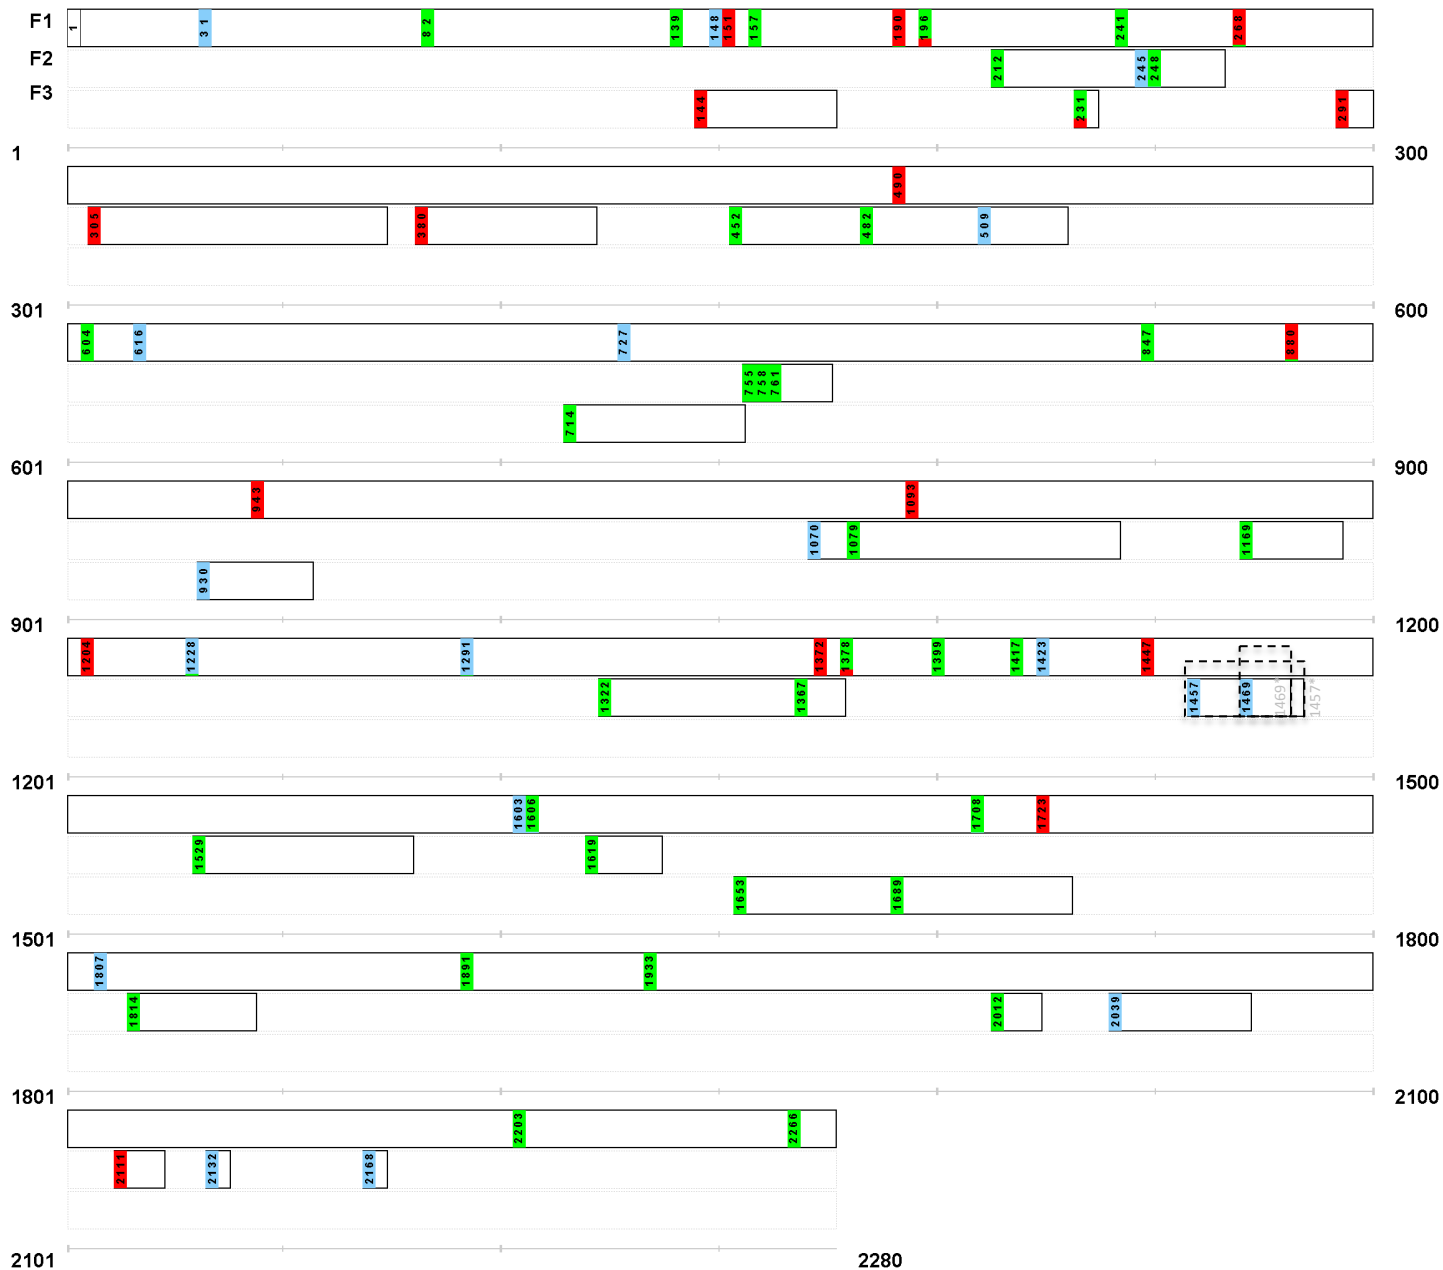

Figure S1. PB2

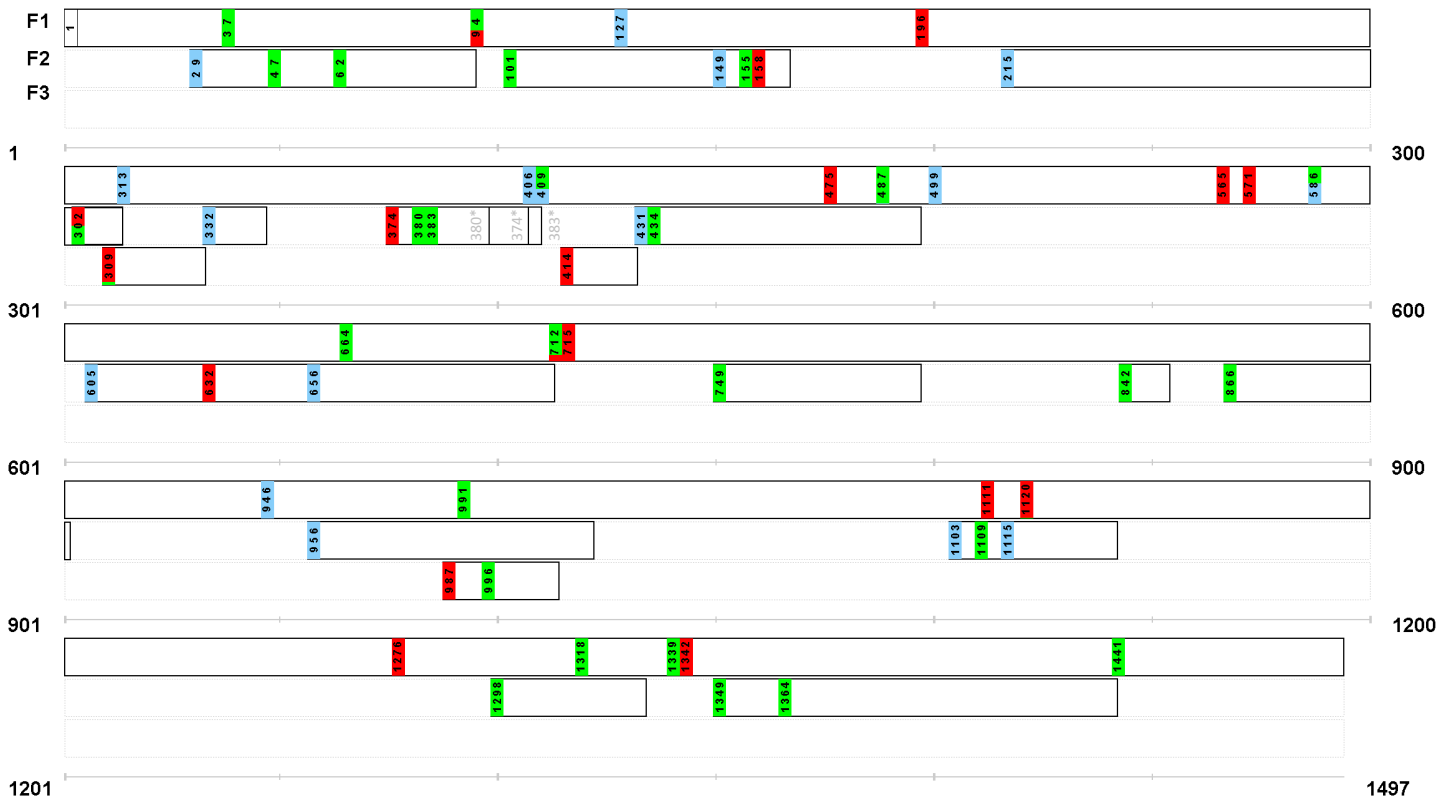

Strong Medium Weak

Figure S2. NP

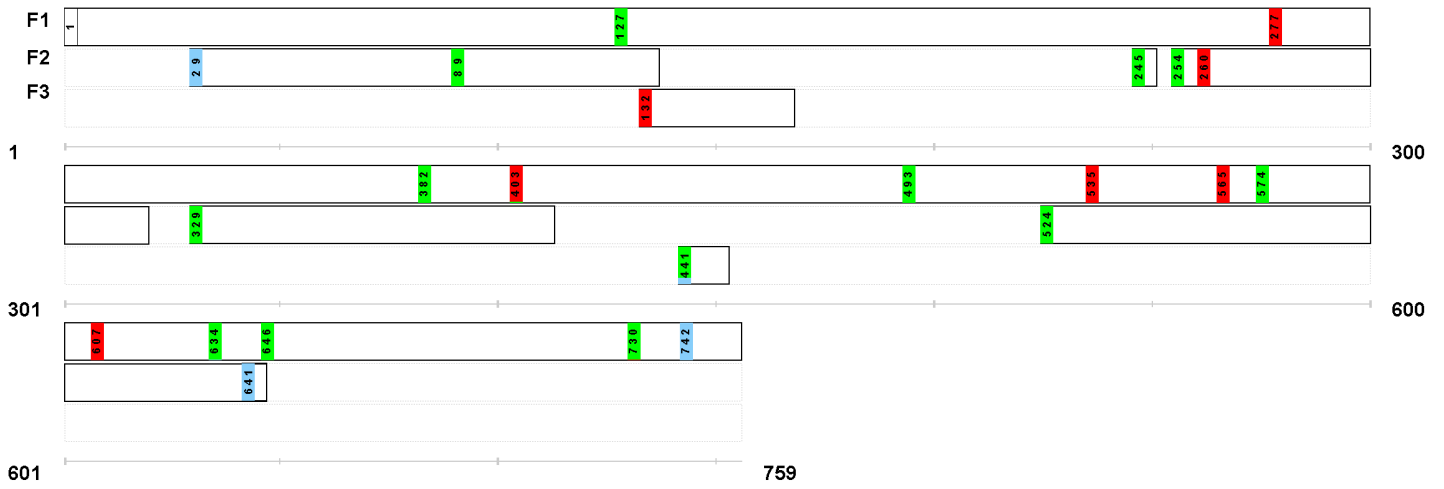

Strong Medium Weak

Figure S3. M1

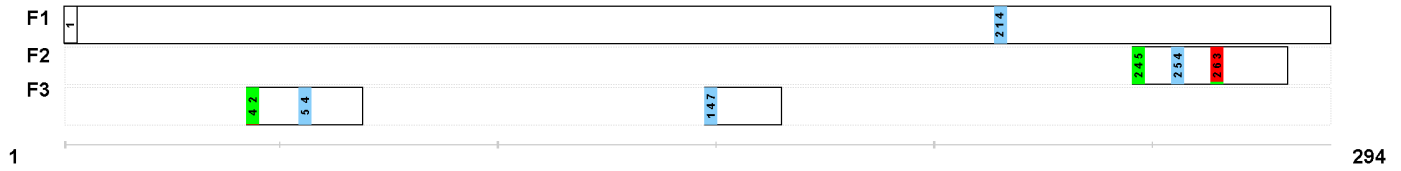

Strong Medium Weak

Figure S4. M2

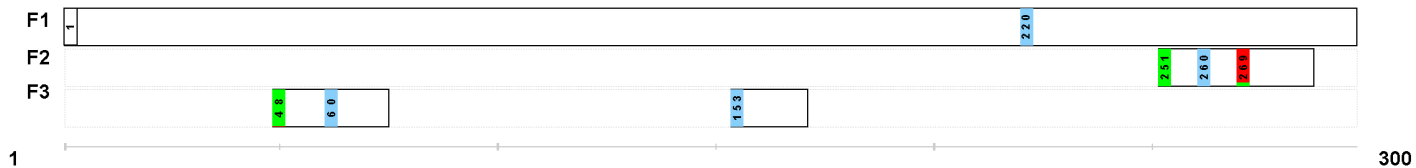

Strong Medium Weak

Figure S5. M42

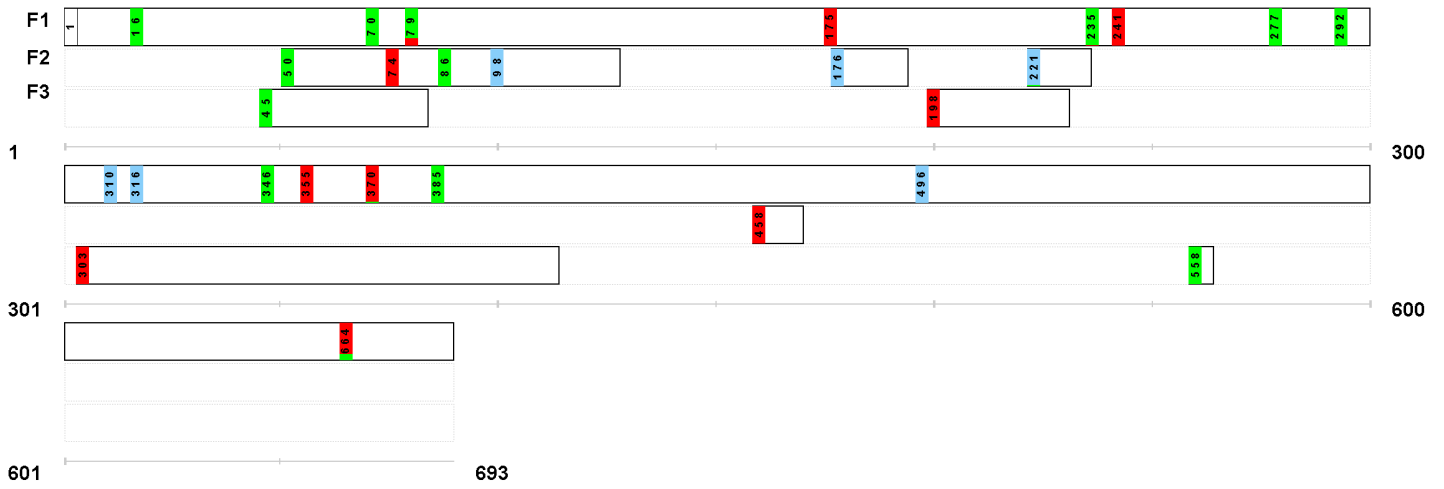

Strong Medium Weak

Figure S6. NS1

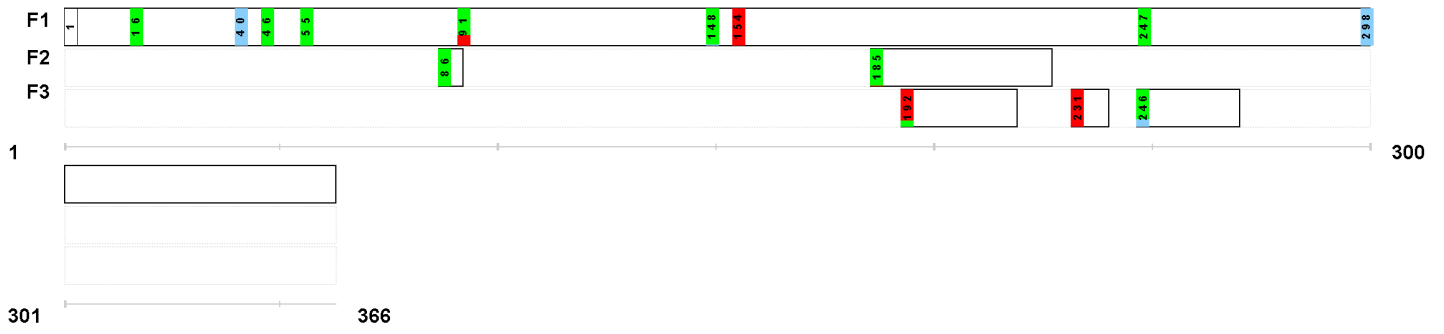

Strong Medium Weak

Figure S7. NS2



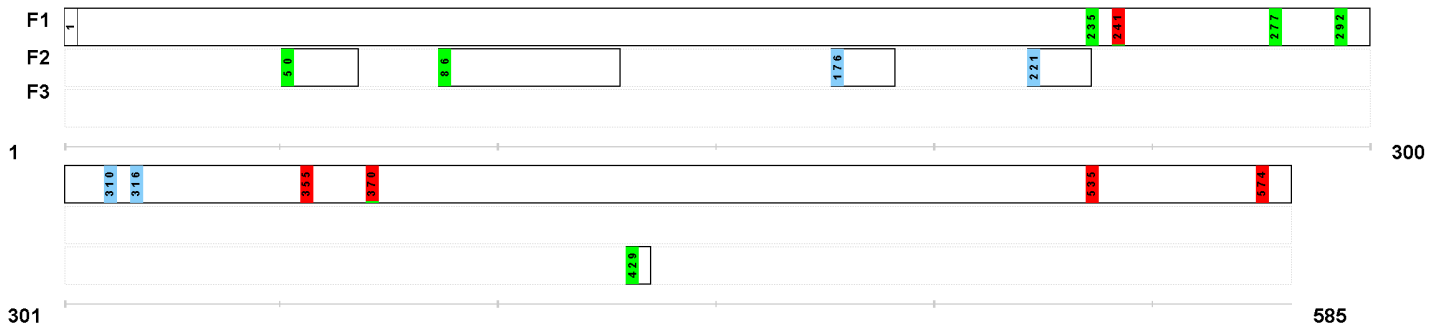

Strong Medium Weak

Figure S8. NS3

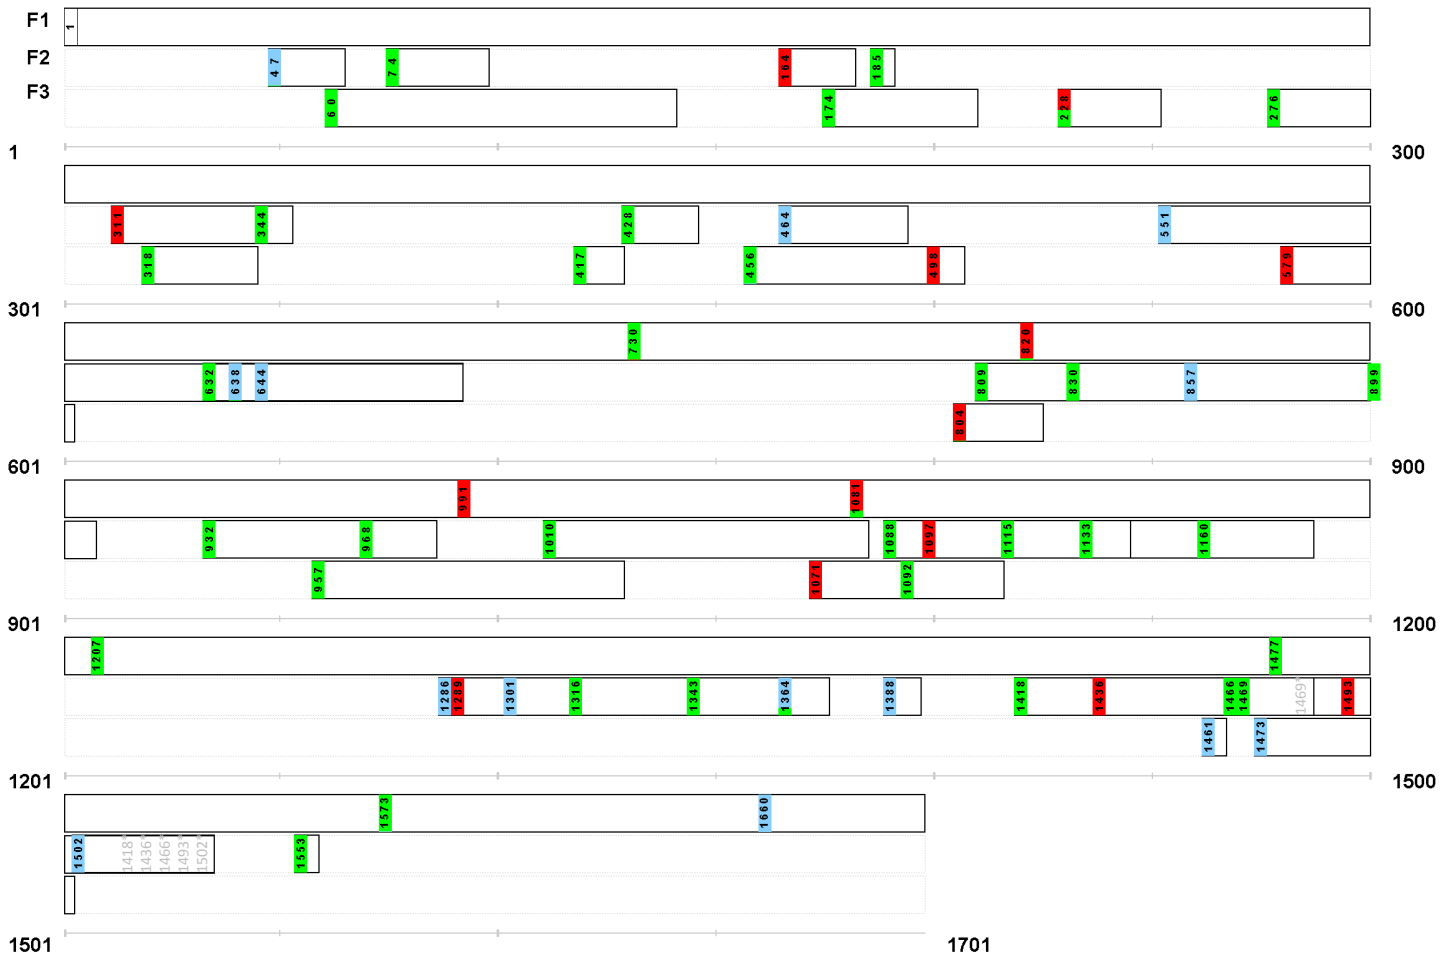

Strong Medium Weak

Figure S9. H1

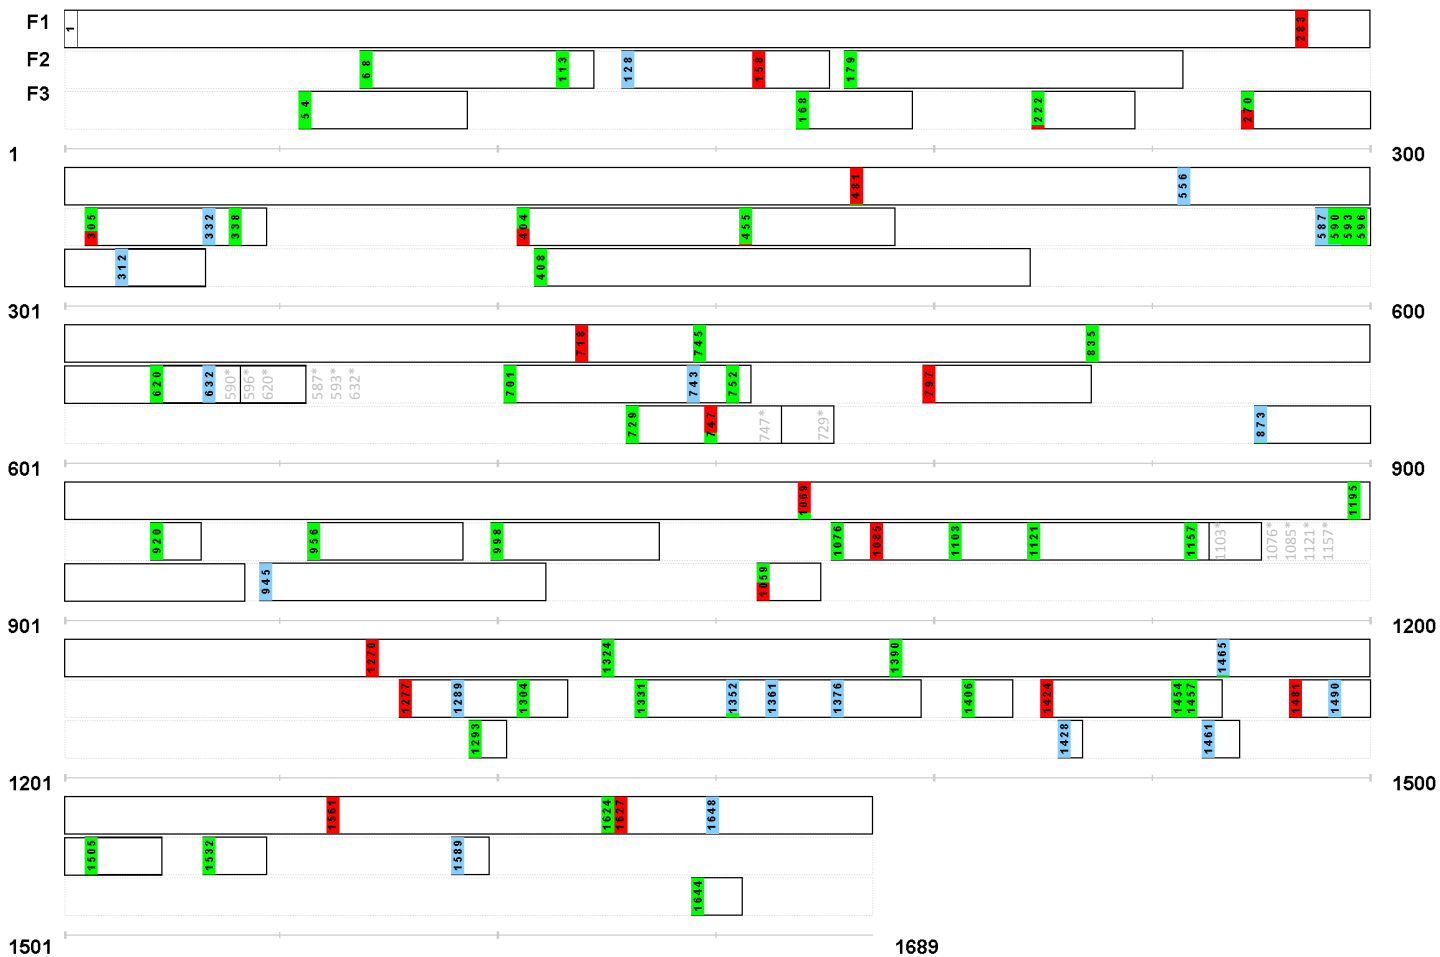

Strong Medium Weak

Figure S10. H2

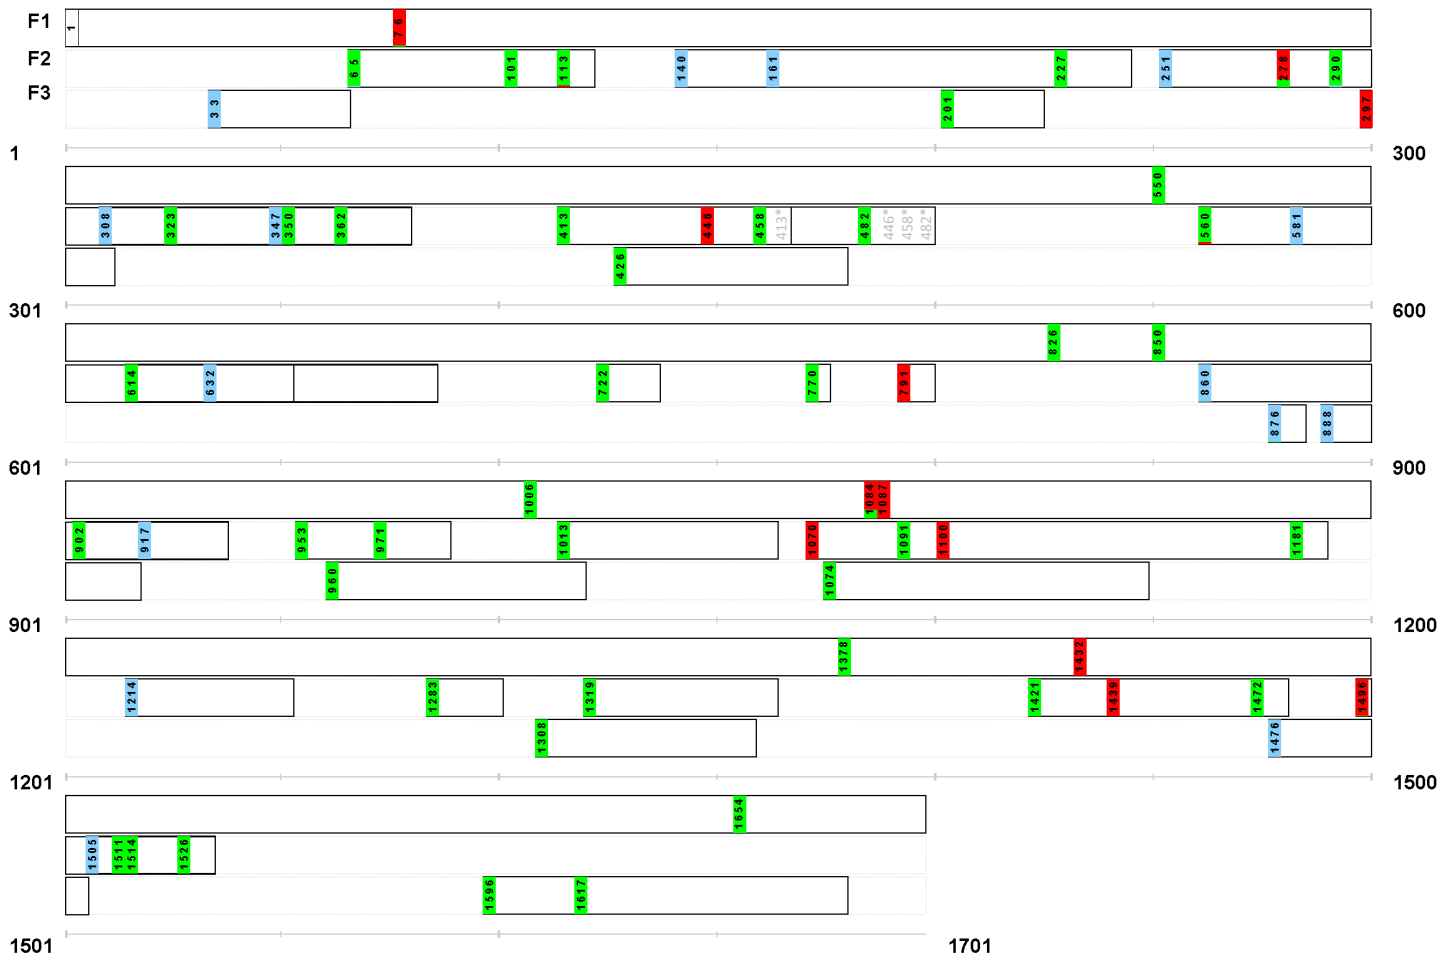

Figure S11. H3

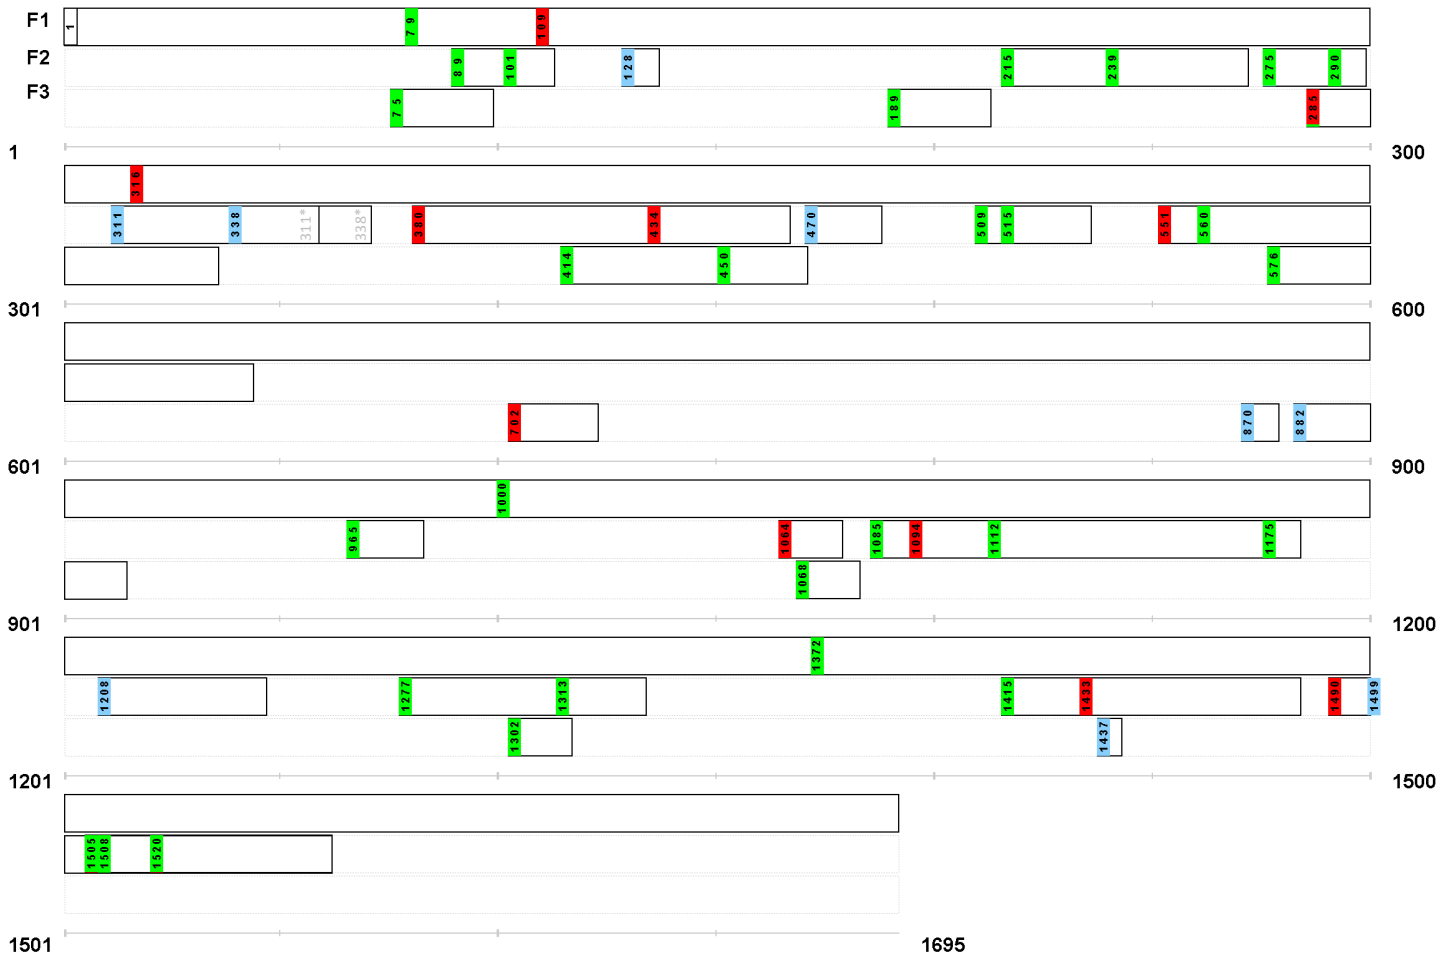

Strong Medium Weak

Figure S12. H4

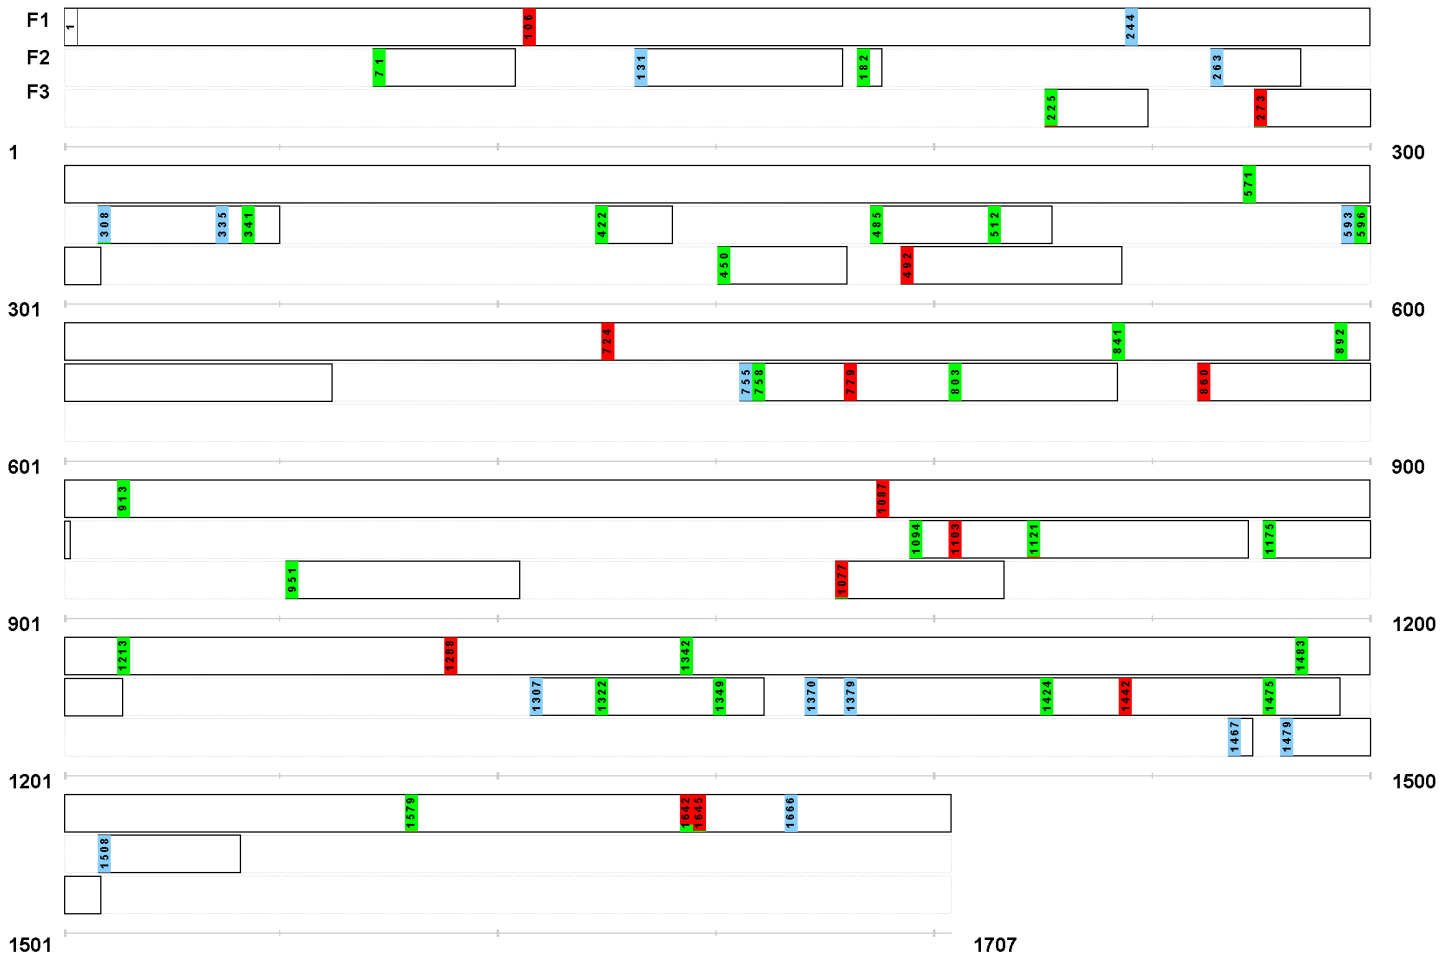

Strong Medium Weak

Figure S13. H5

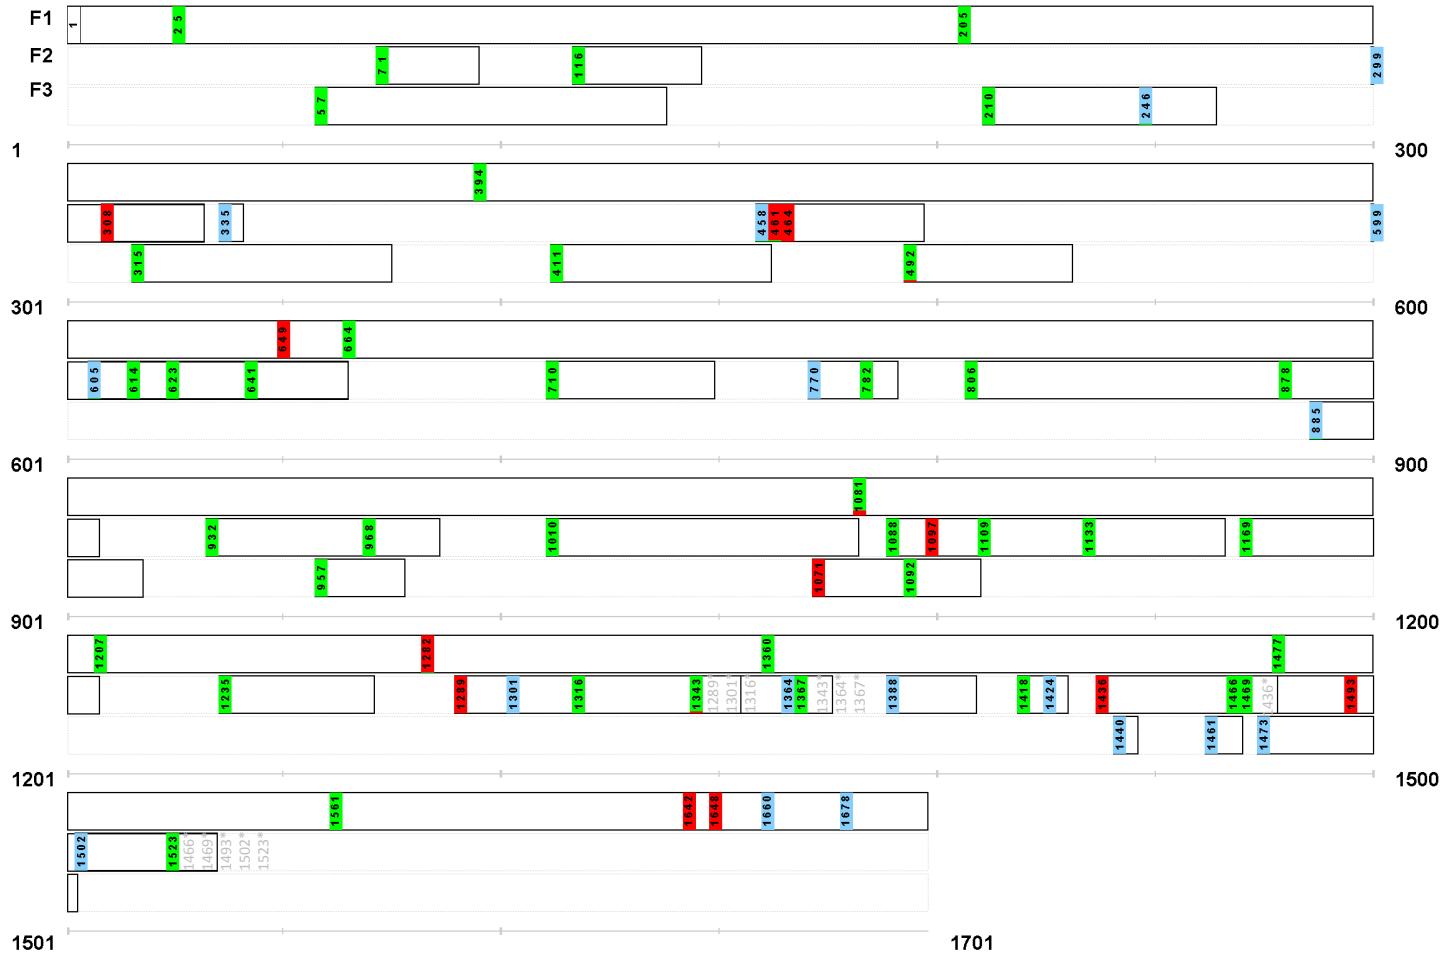

Strong Medium Weak

Figure S14. H6

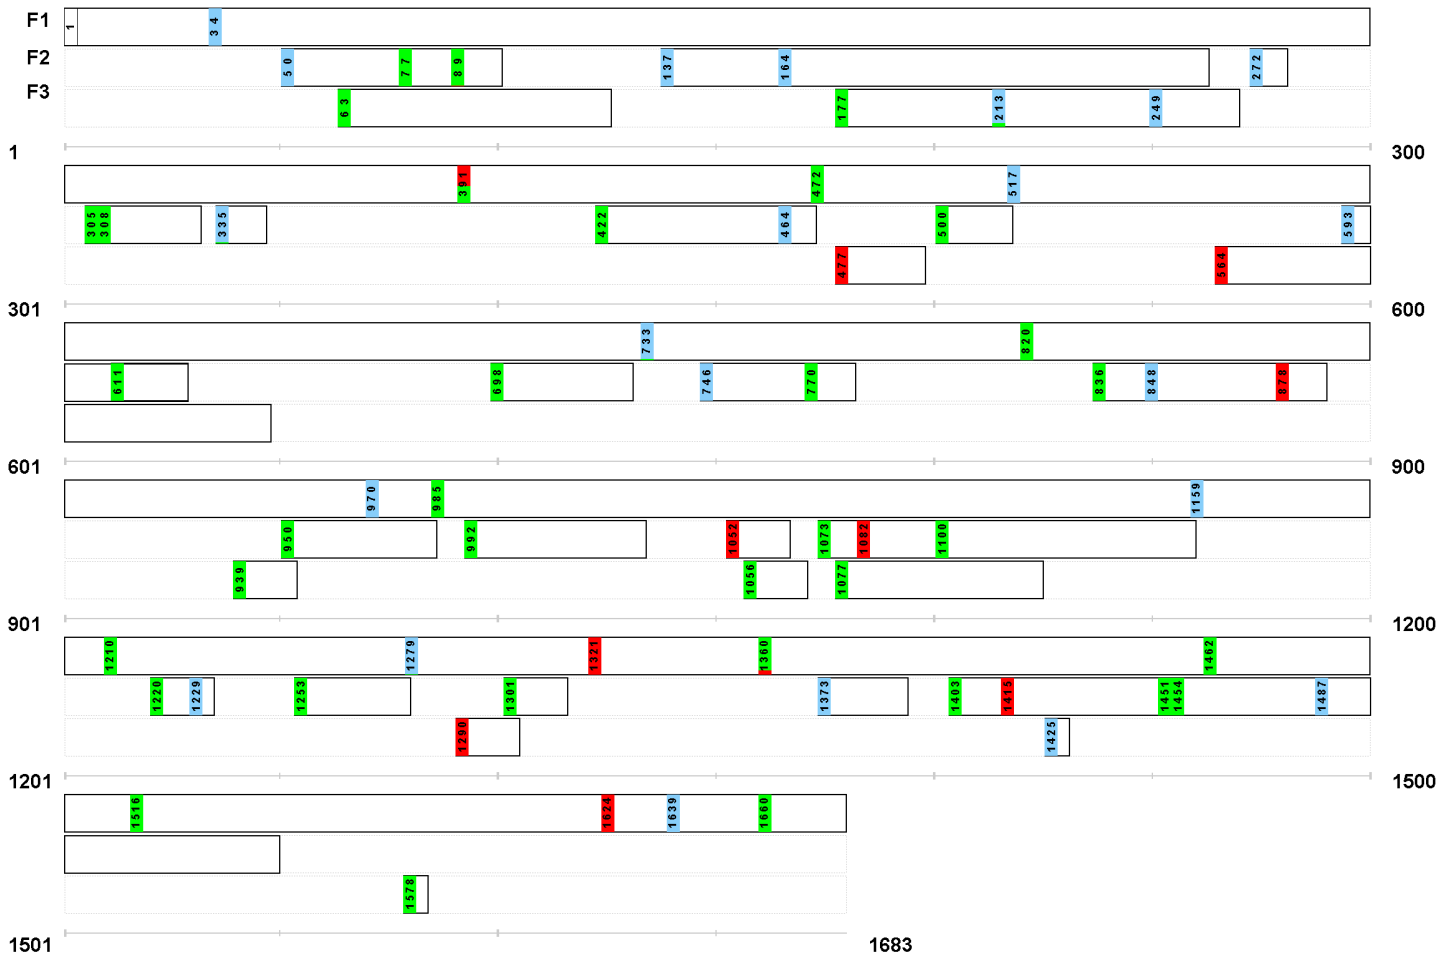

Strong Medium Weak

Figure S15. H7



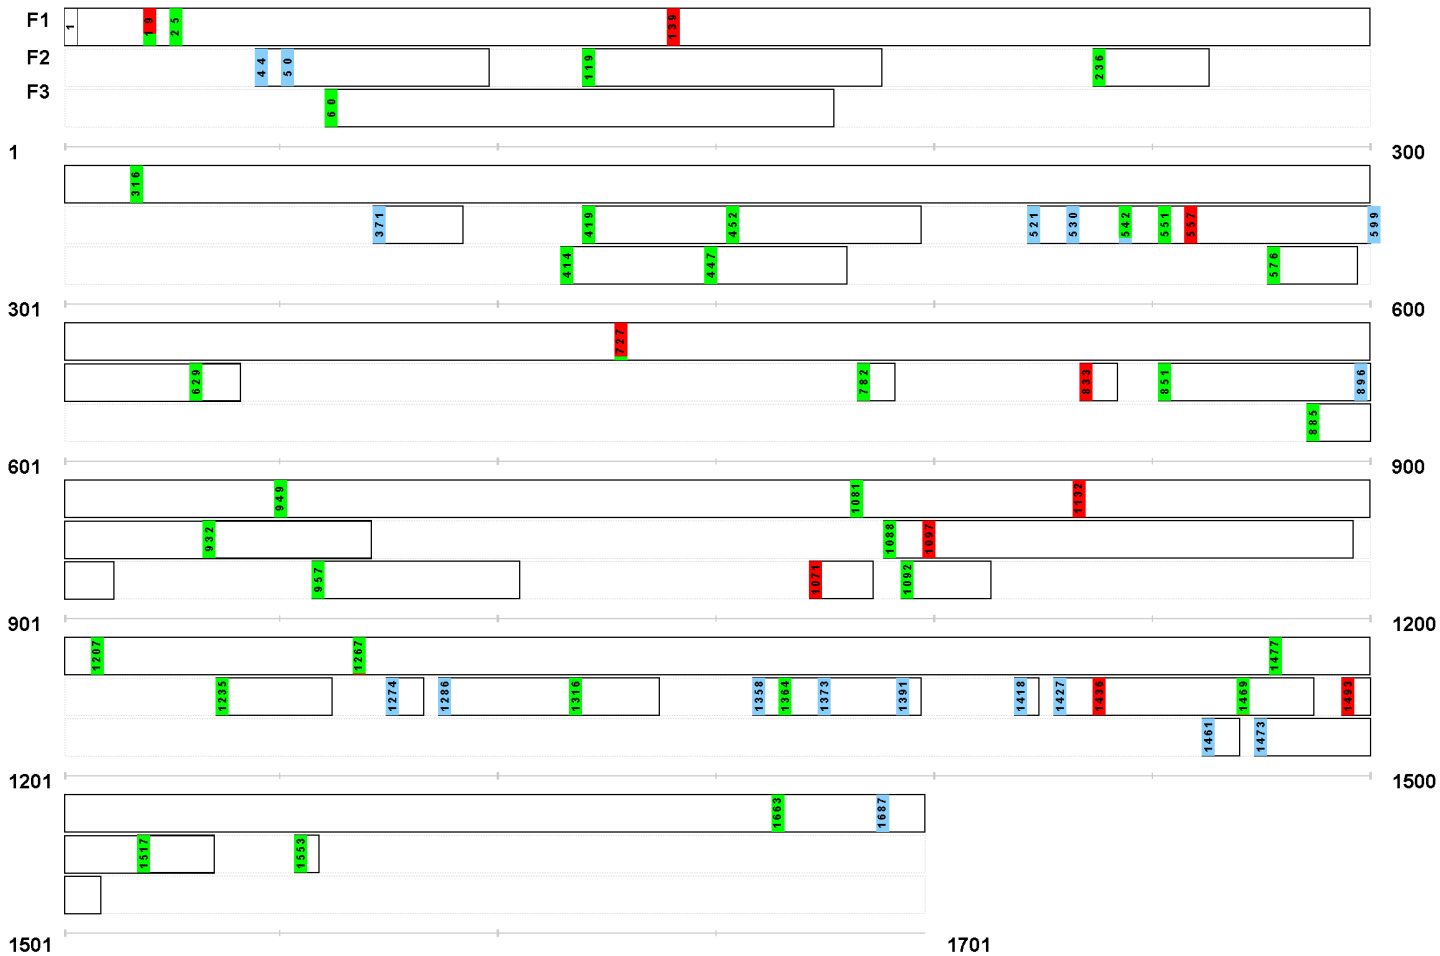

Strong Medium Weak

Figure S16. H8

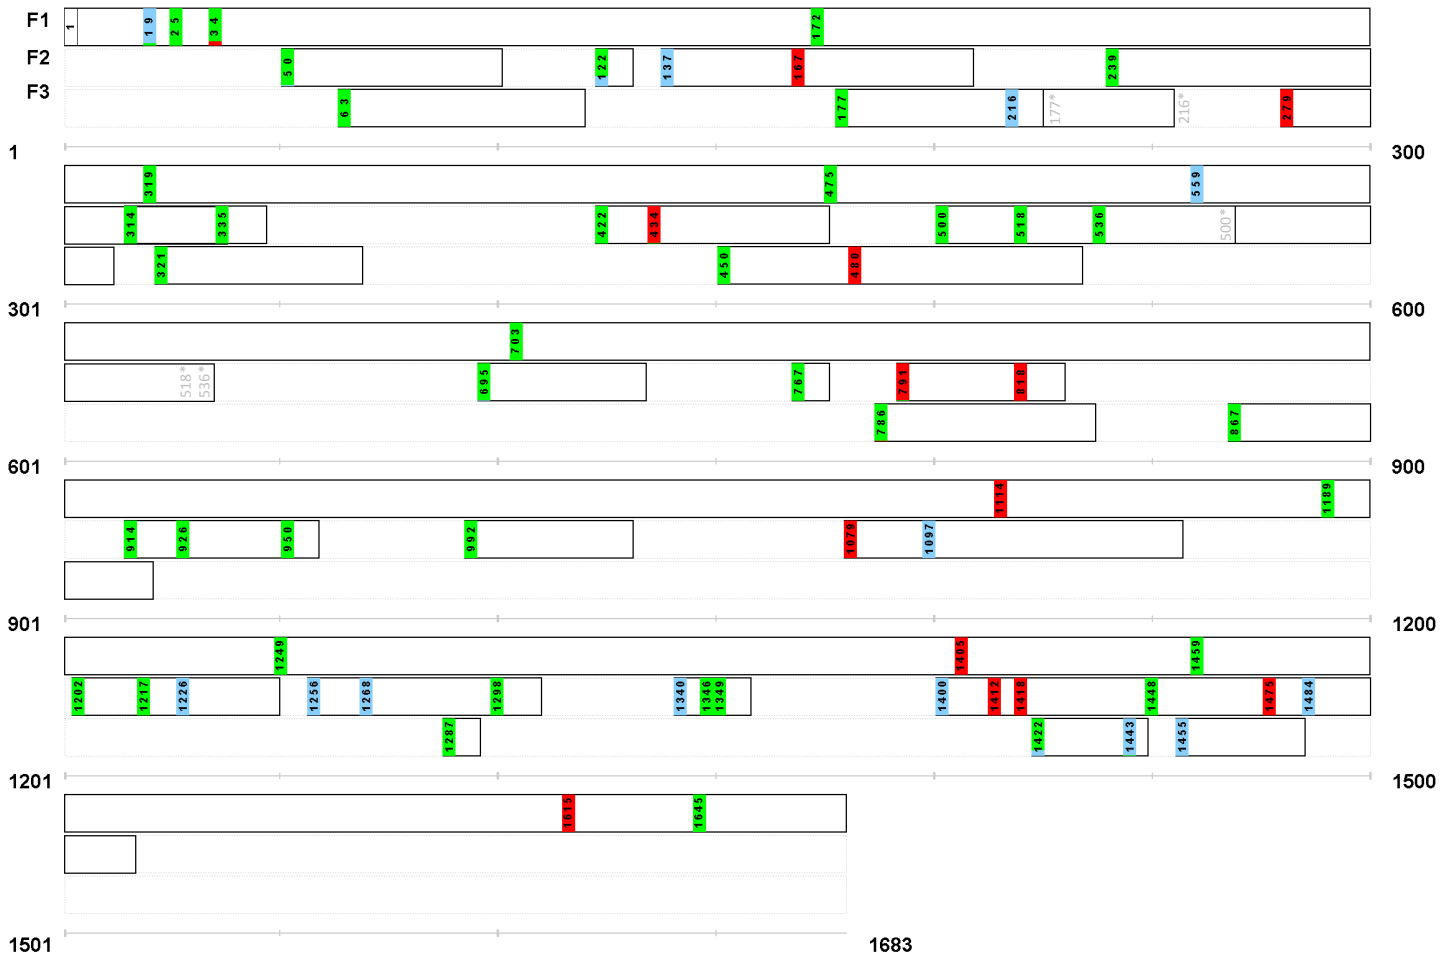

Strong Medium Weak

Figure S17. H9

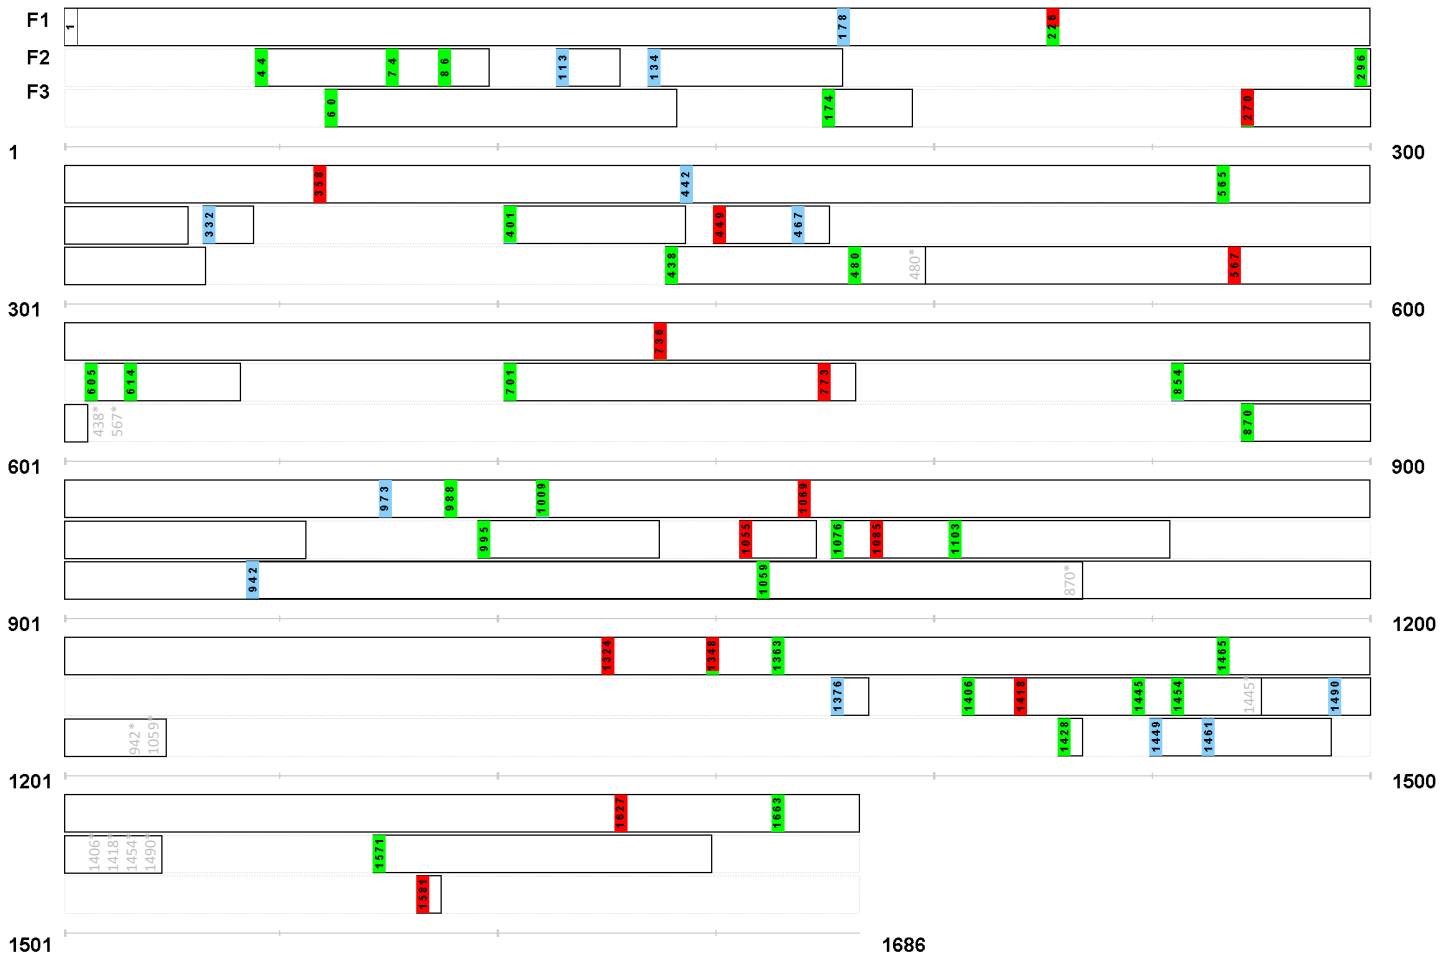

Strong Medium Weak

Figure S18. H10

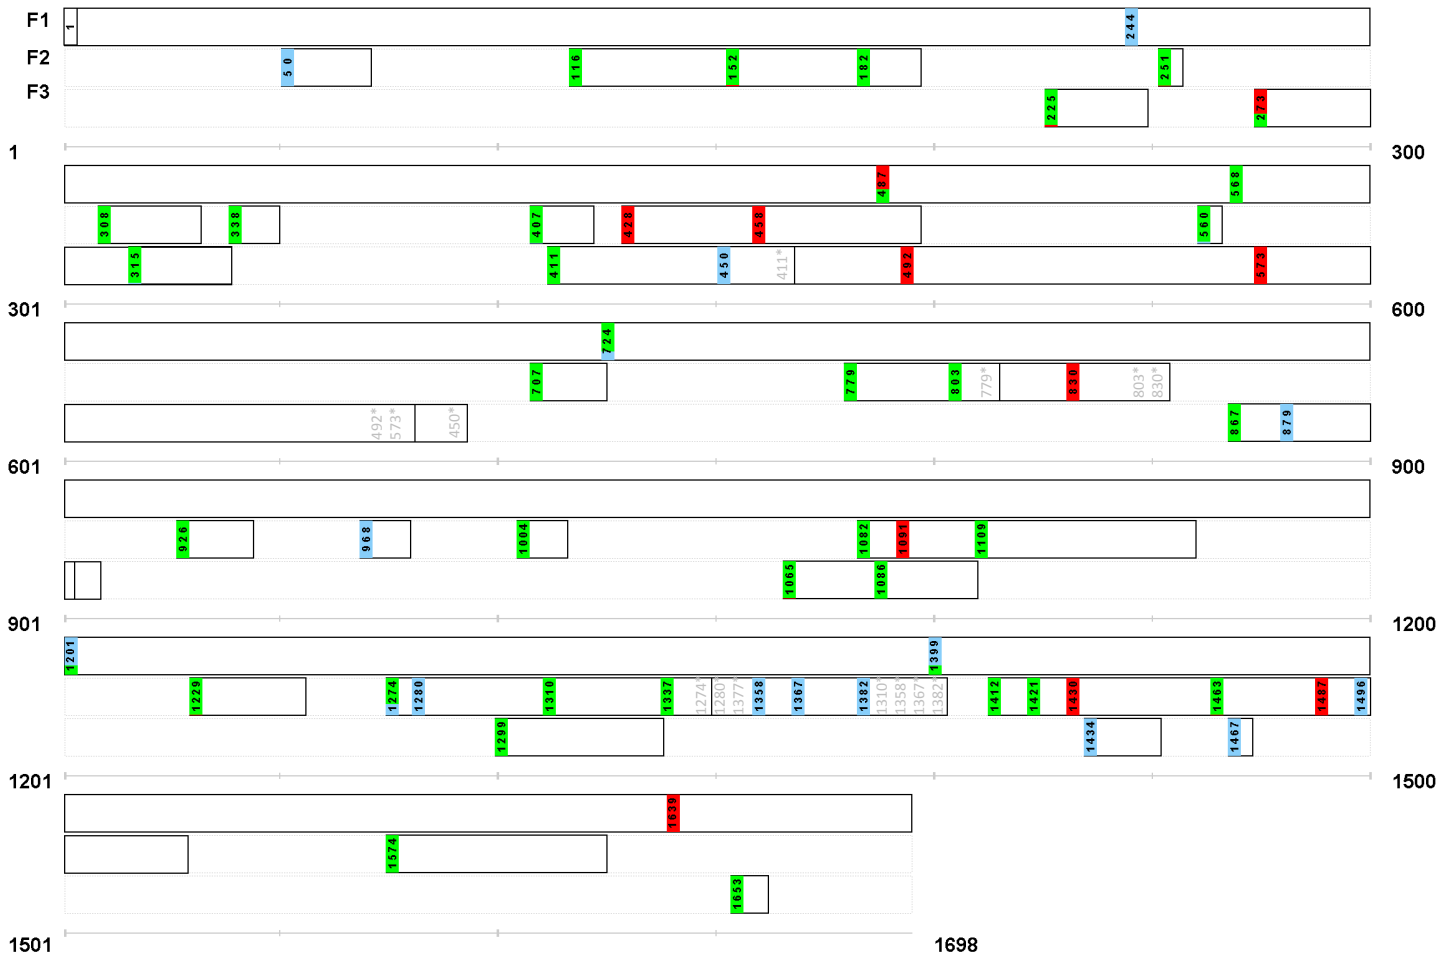

Strong Medium Weak

Figure S19. H11

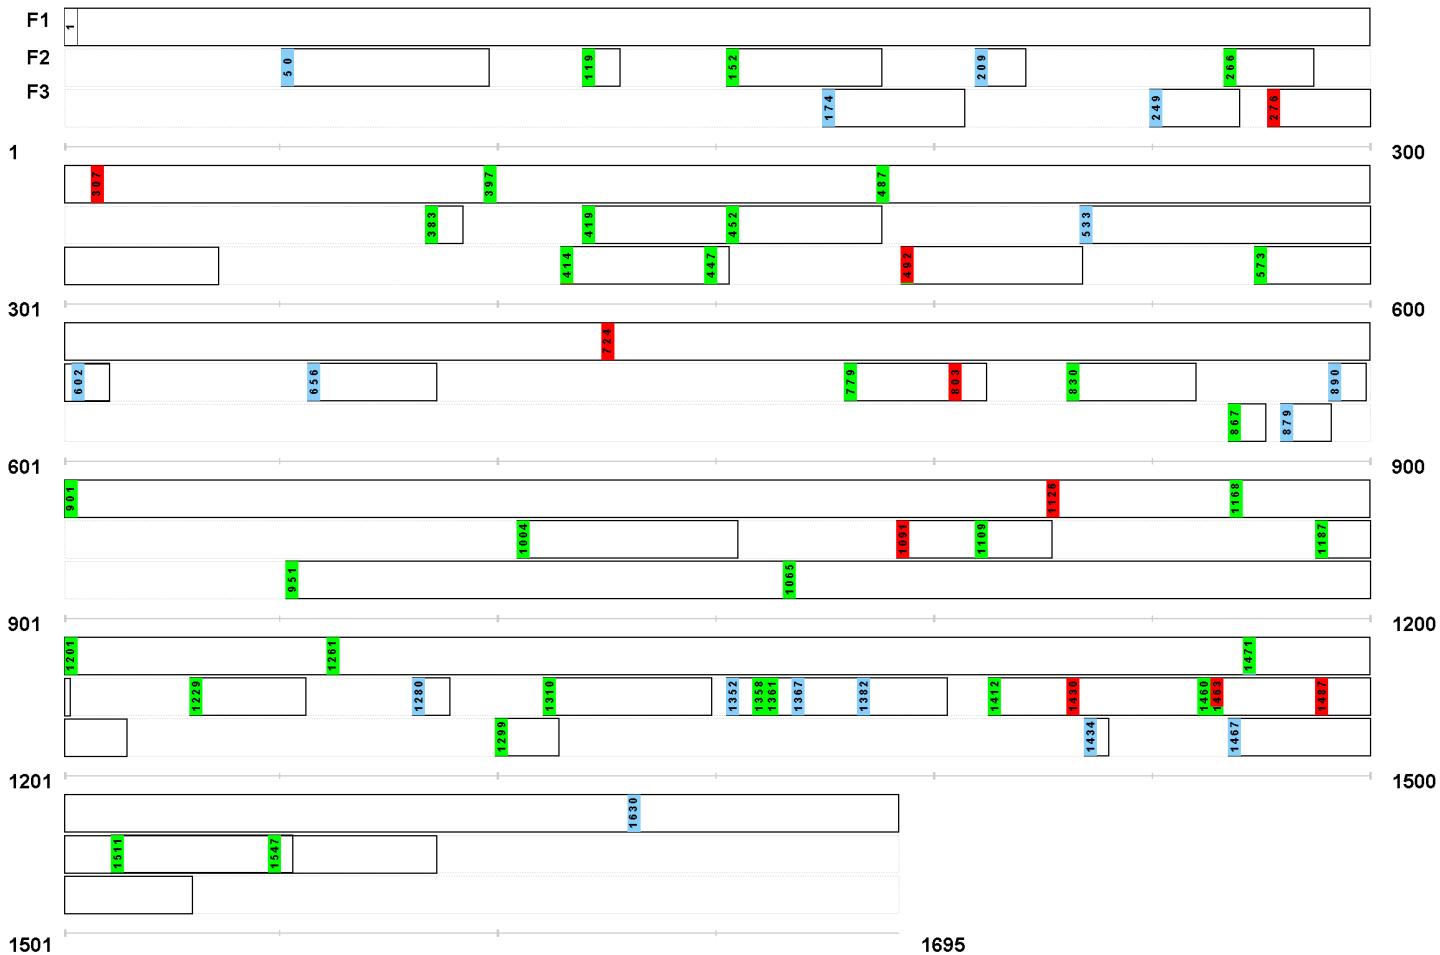

Strong Medium Weak

Figure S20. H12

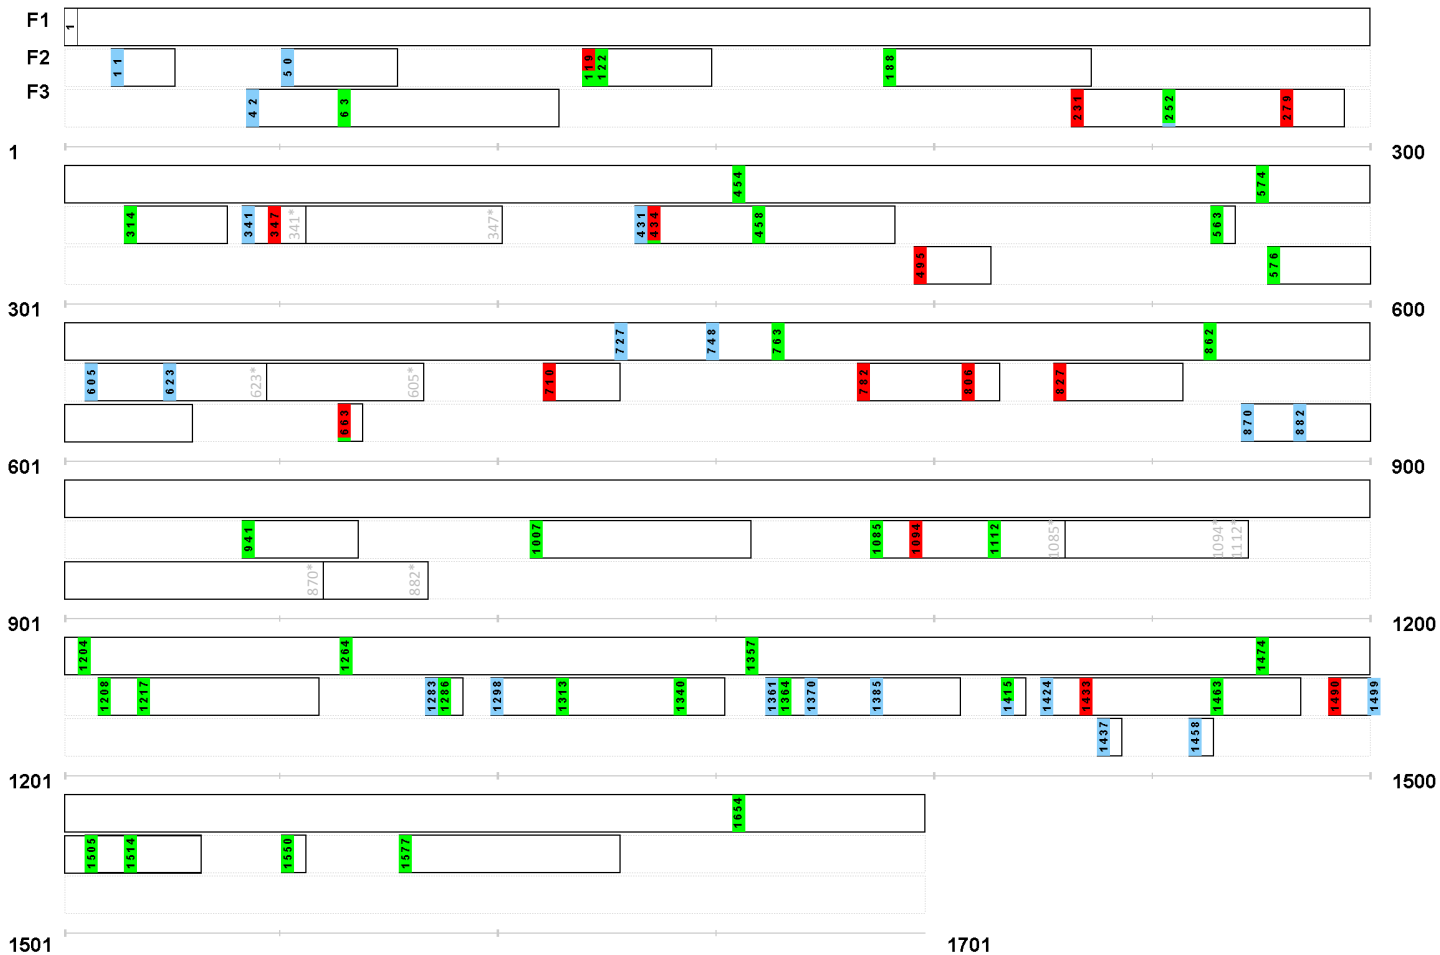

Strong Medium Weak

Figure S21. H13

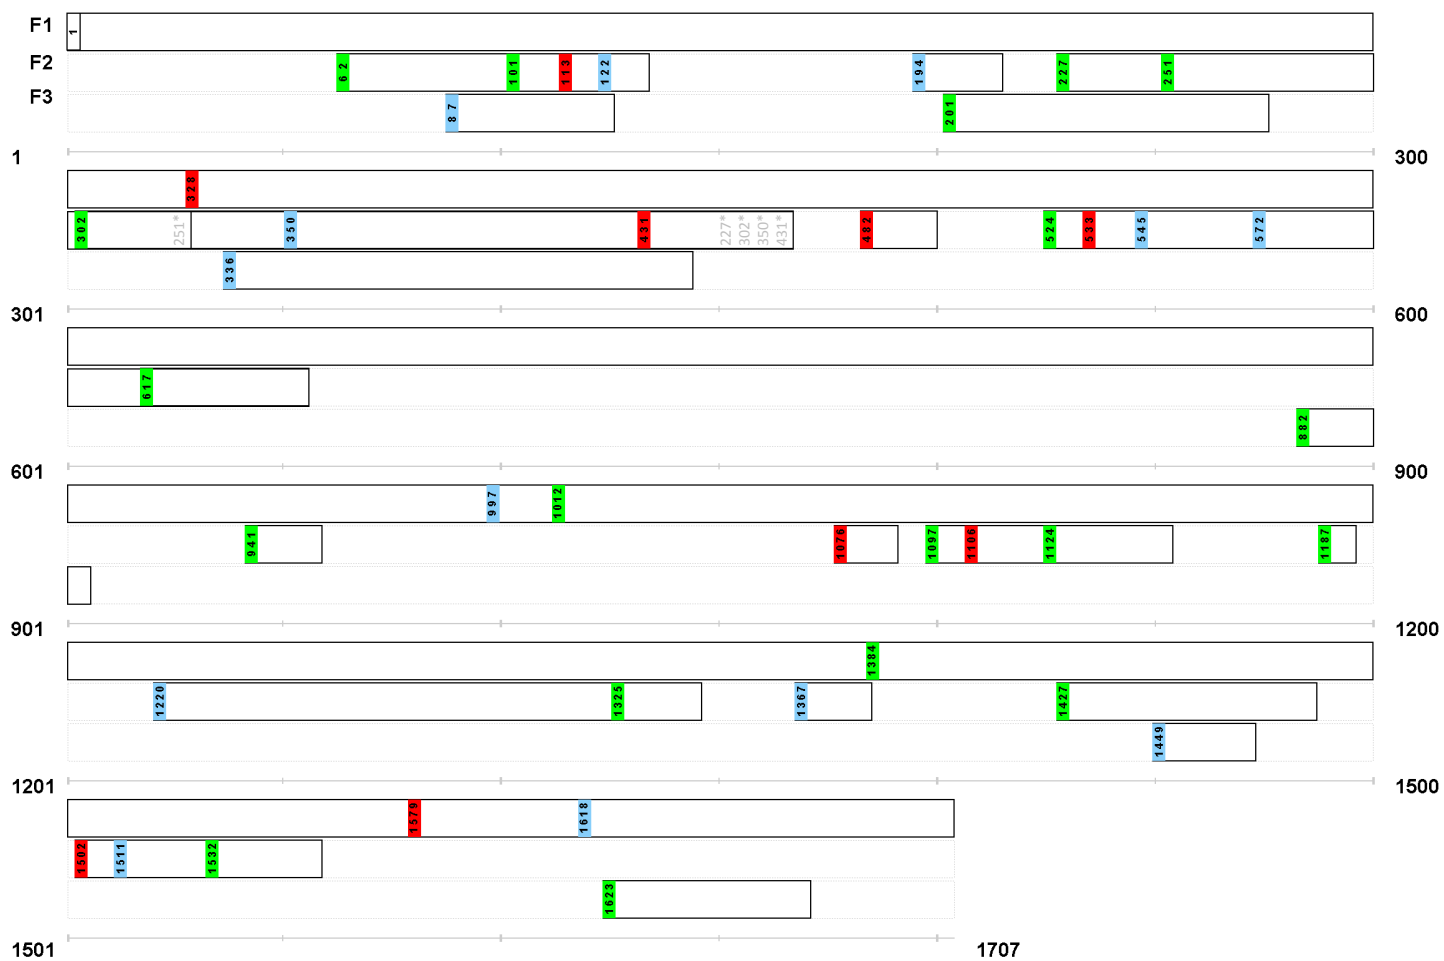

Strong Medium Weak

Figure S22. H14

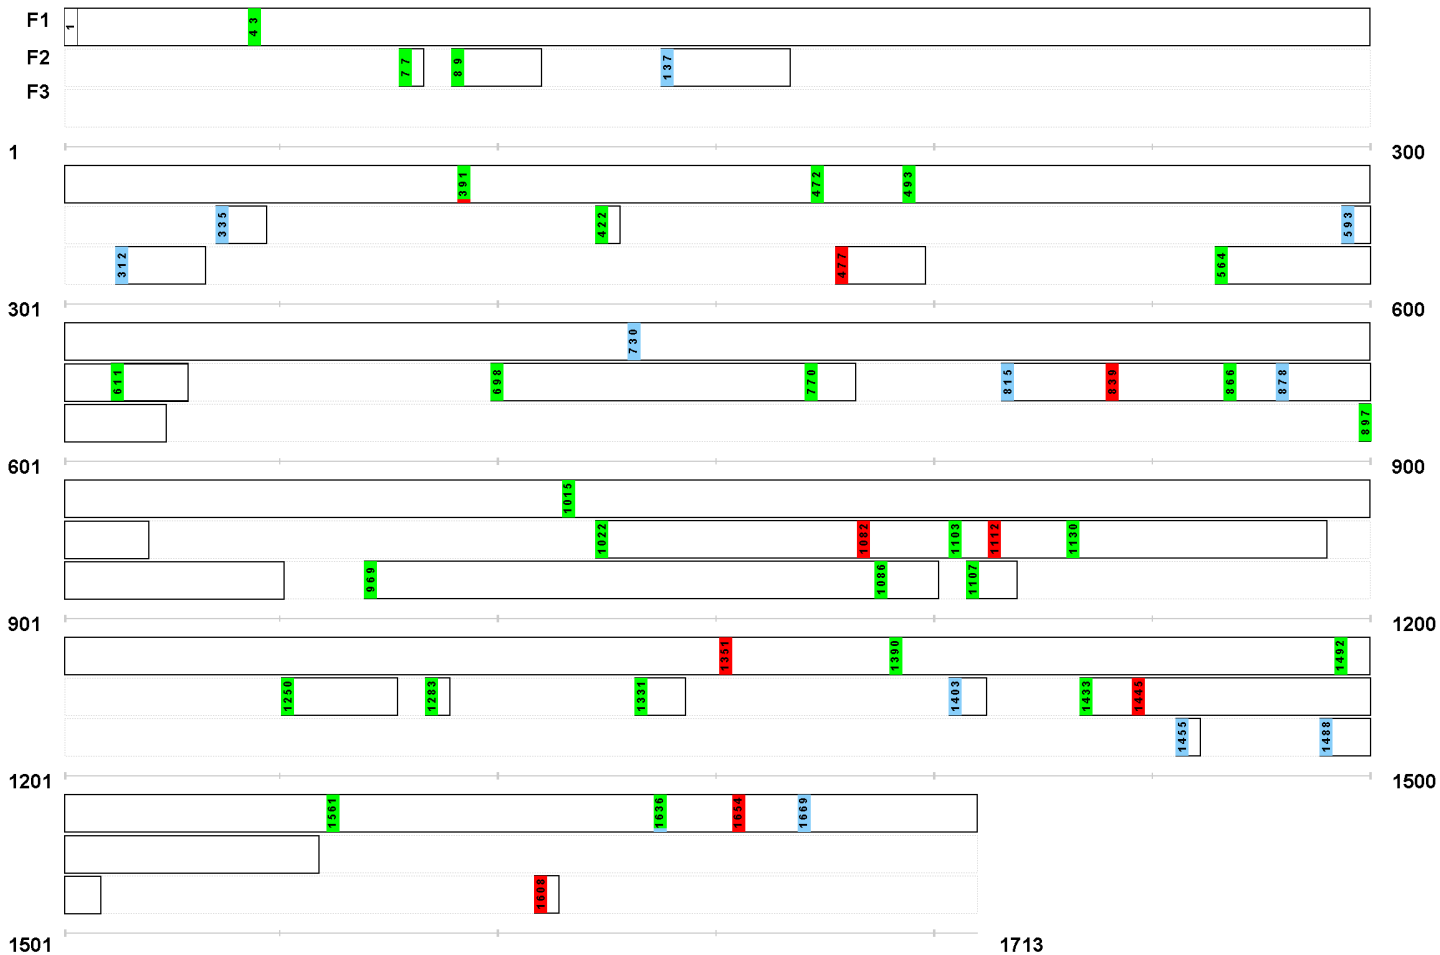

Strong Medium Weak

Figure S23. H15



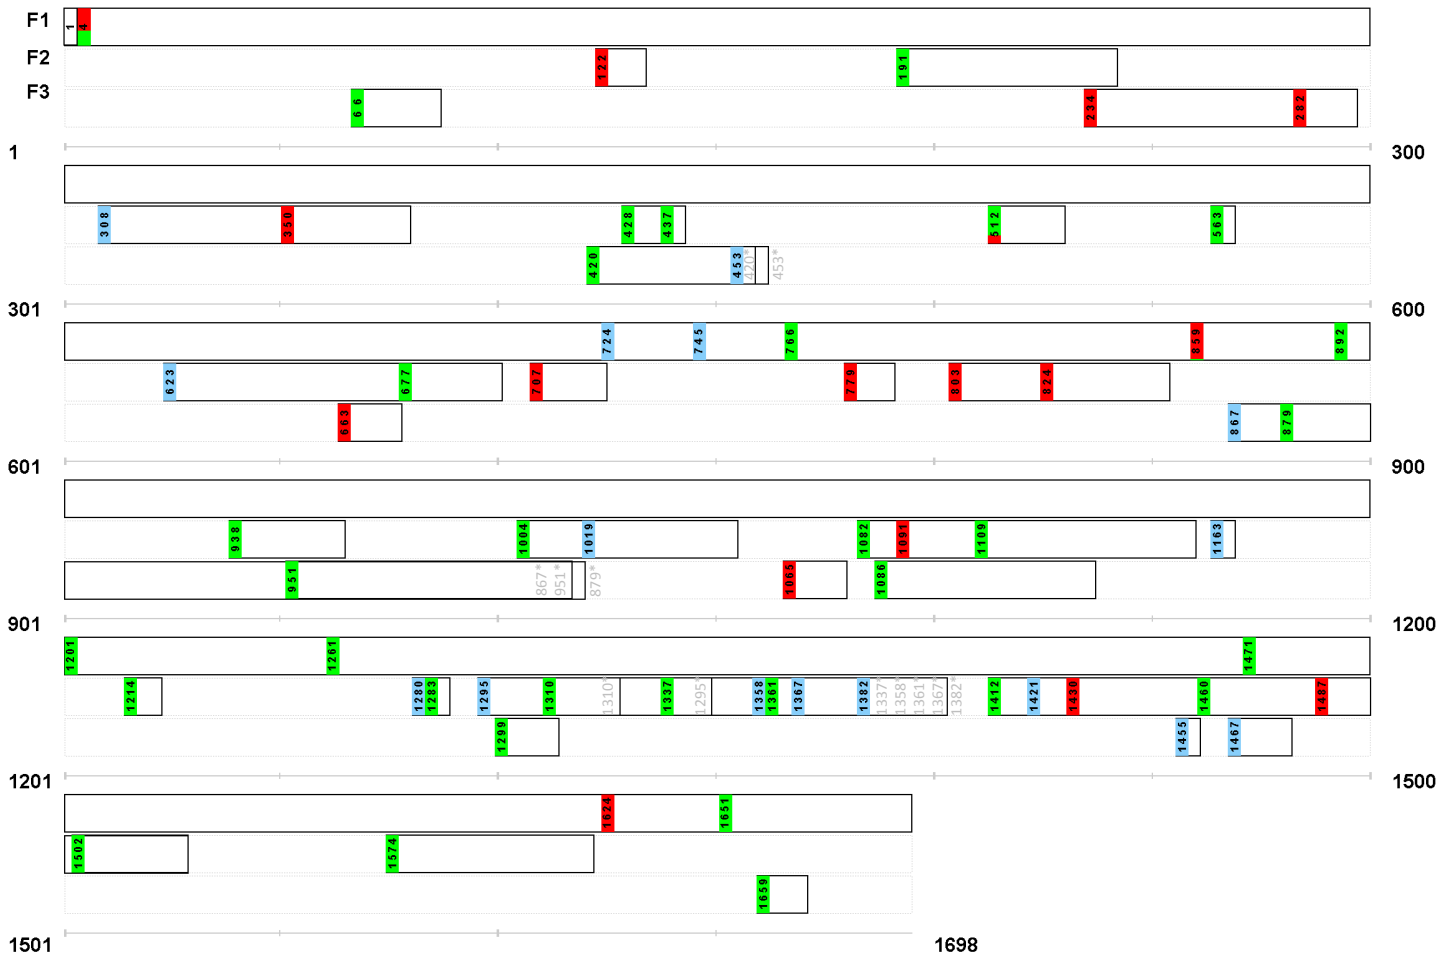

Strong Medium Weak

Figure S24. H16

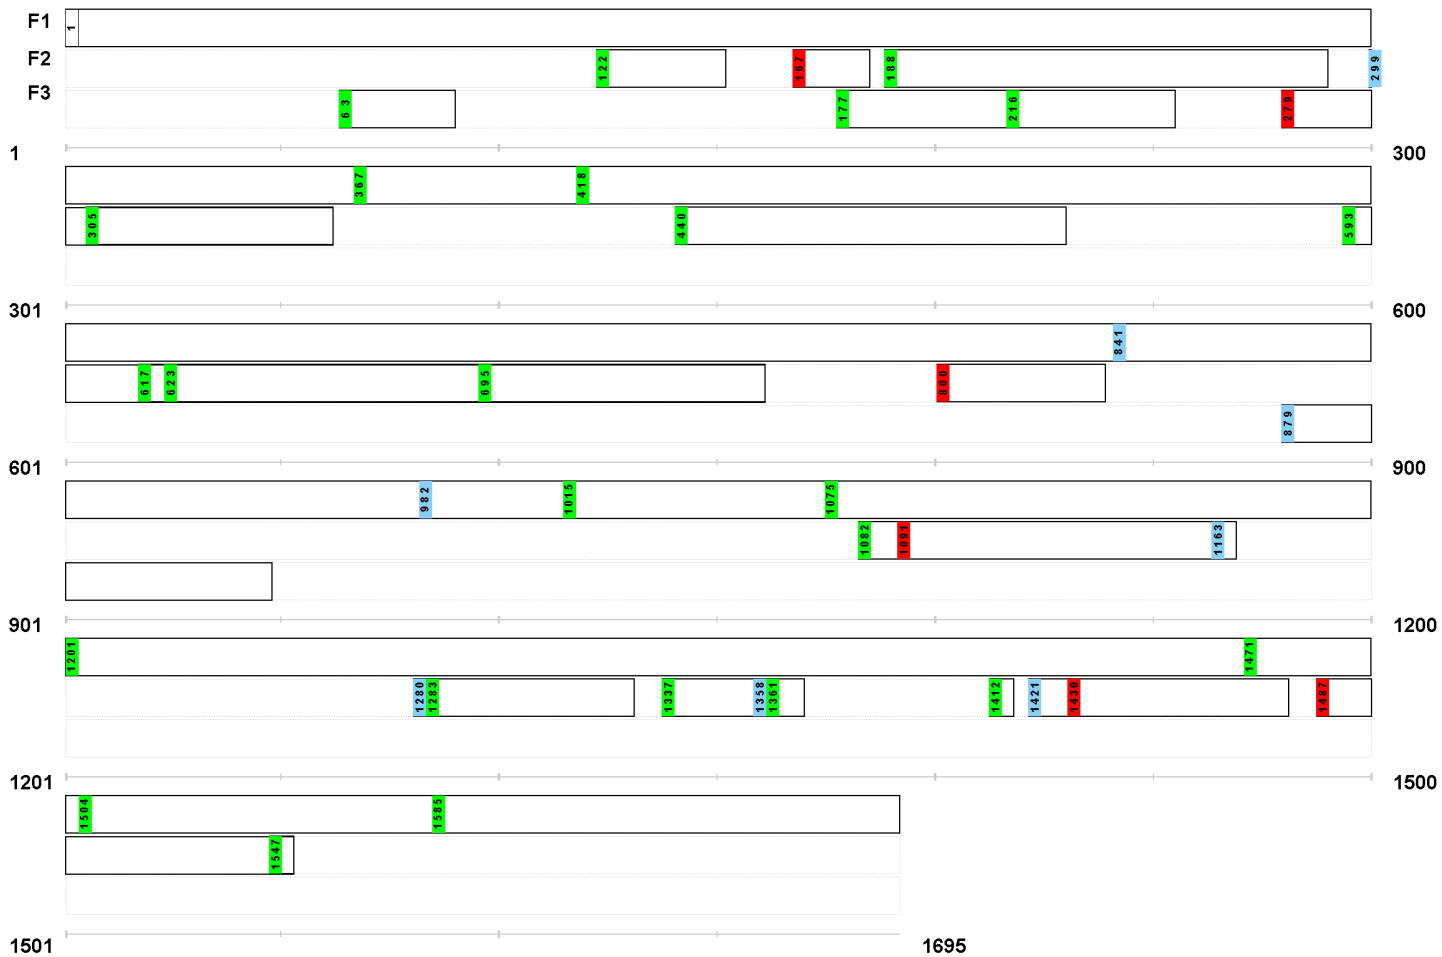

Strong Medium Weak

Figure S25. H17

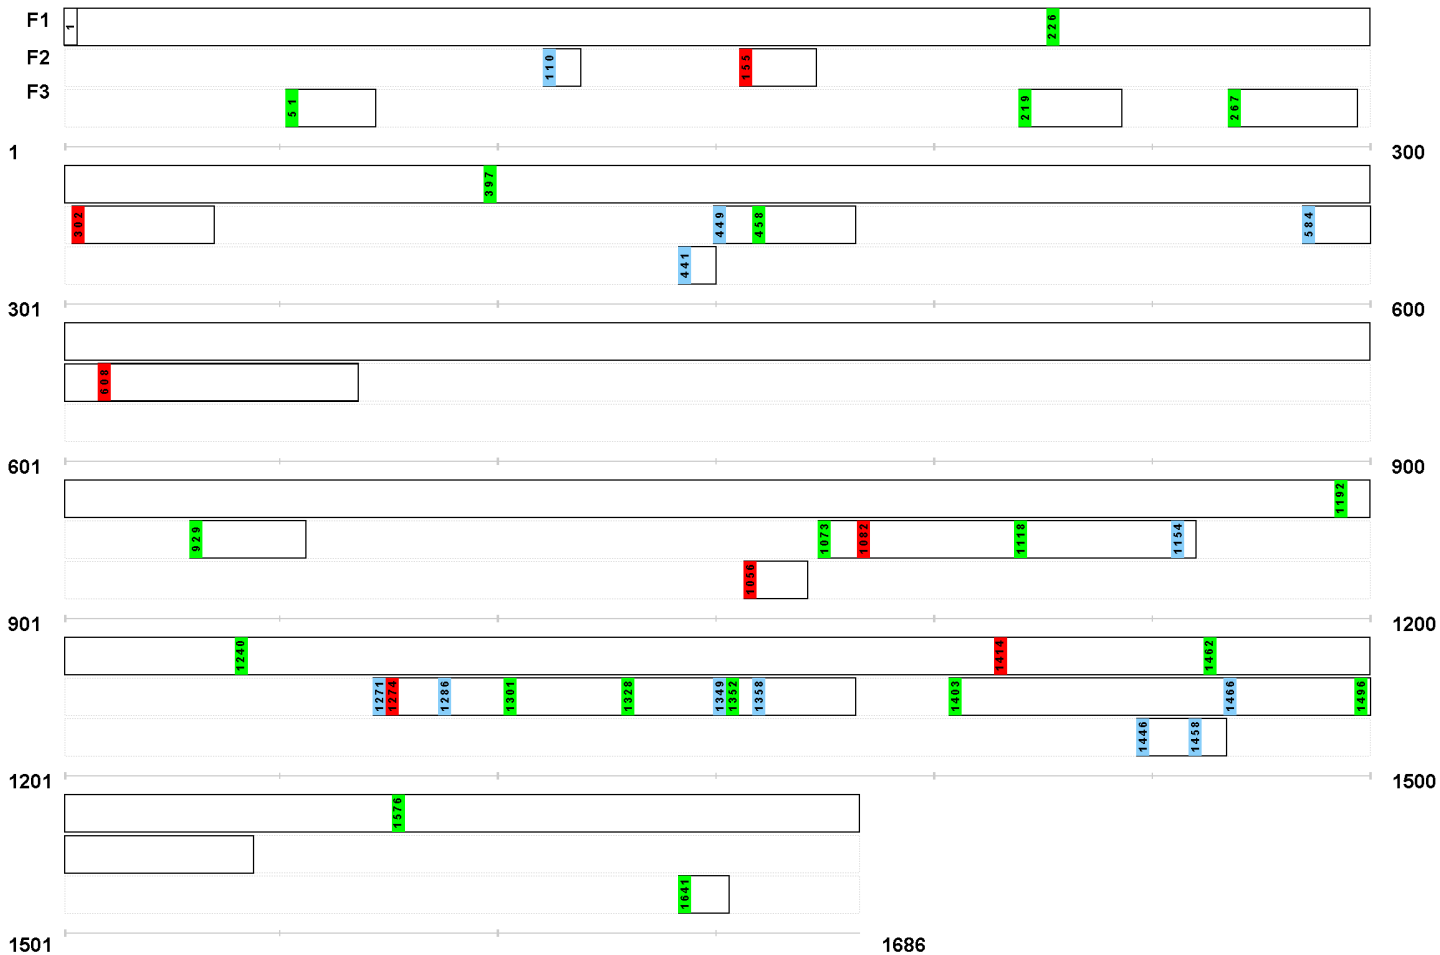

Strong Medium Weak

Figure S26. H18

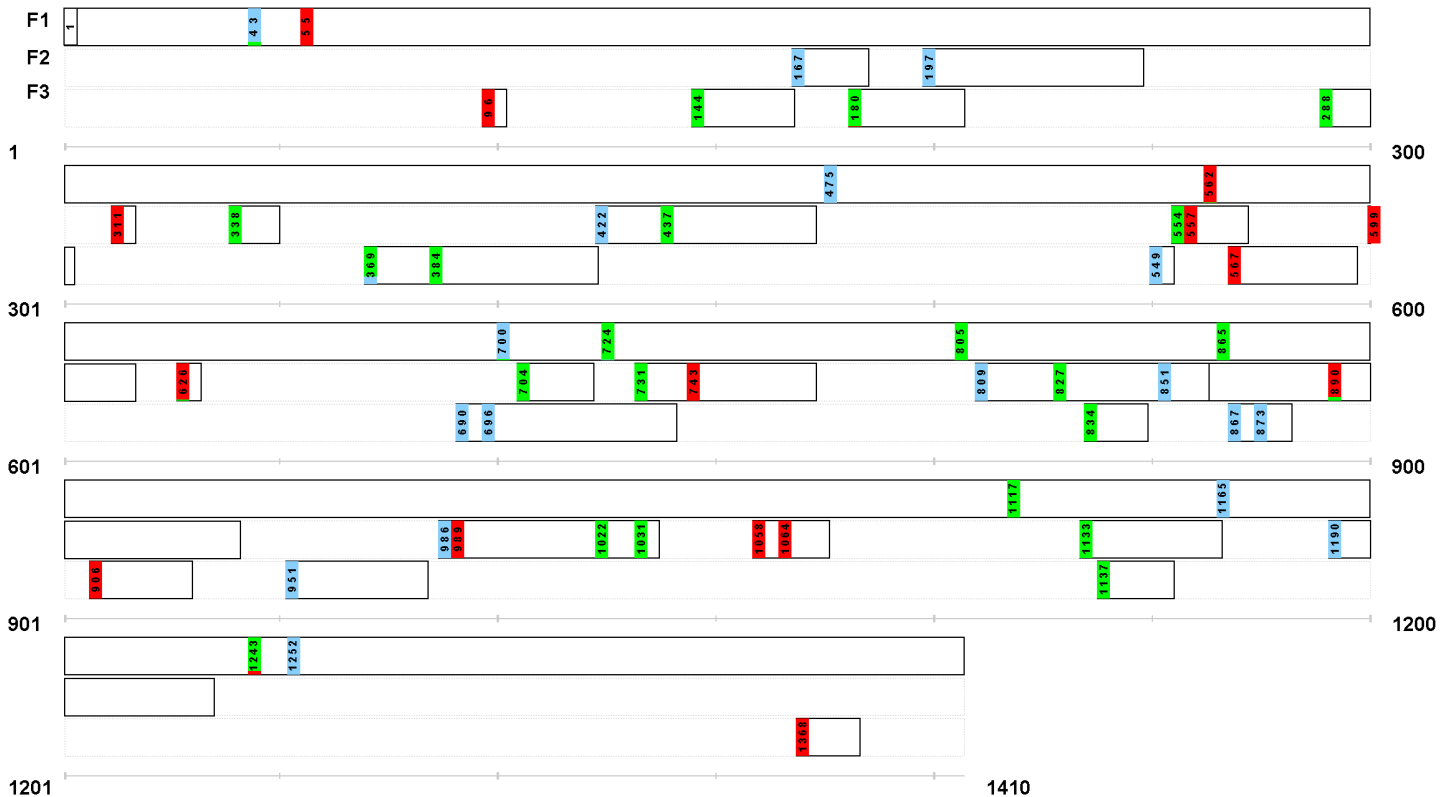

Strong Medium Weak

Figure S27. N1

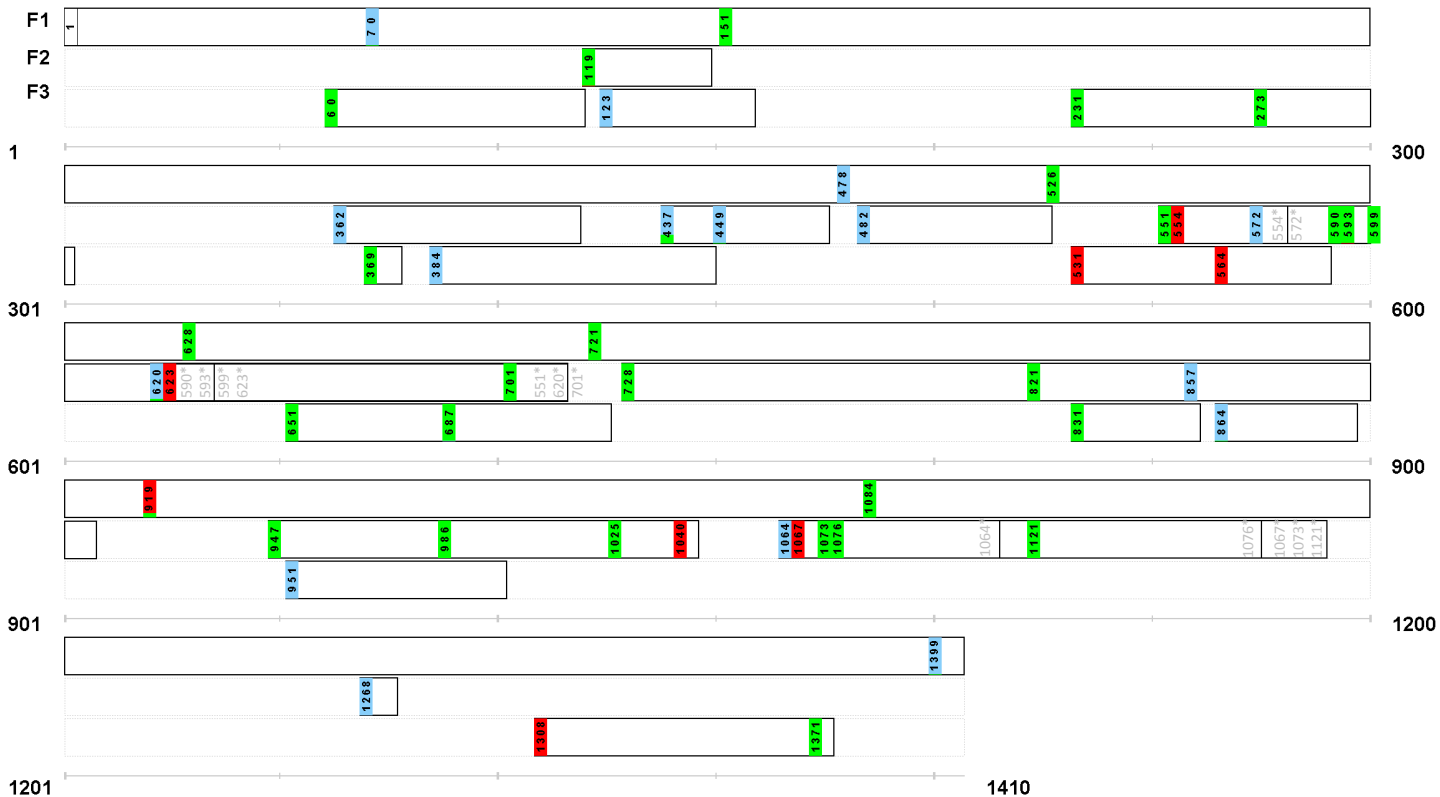

Strong Medium Weak

Figure S28. N2

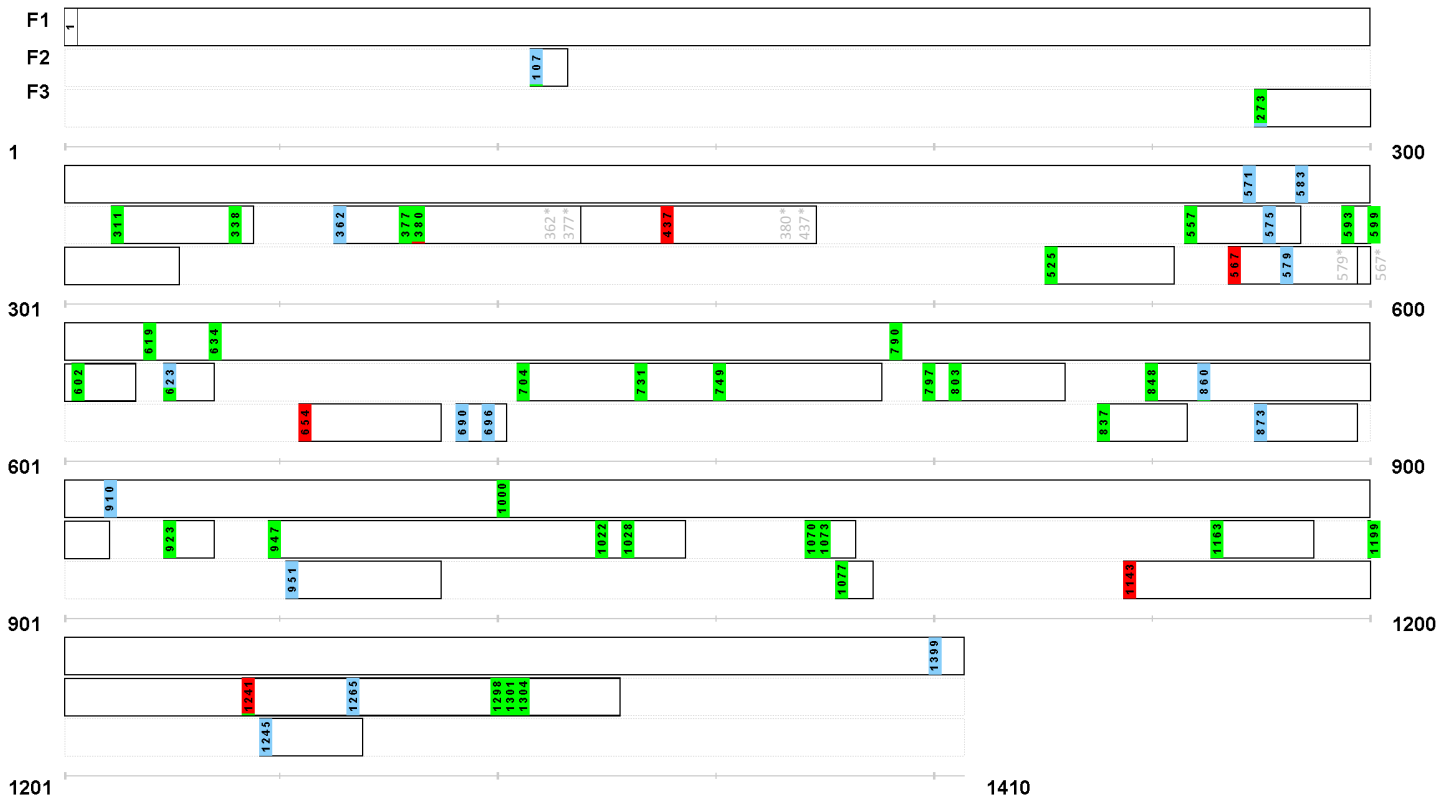

Strong Medium Weak

Figure S29. N3

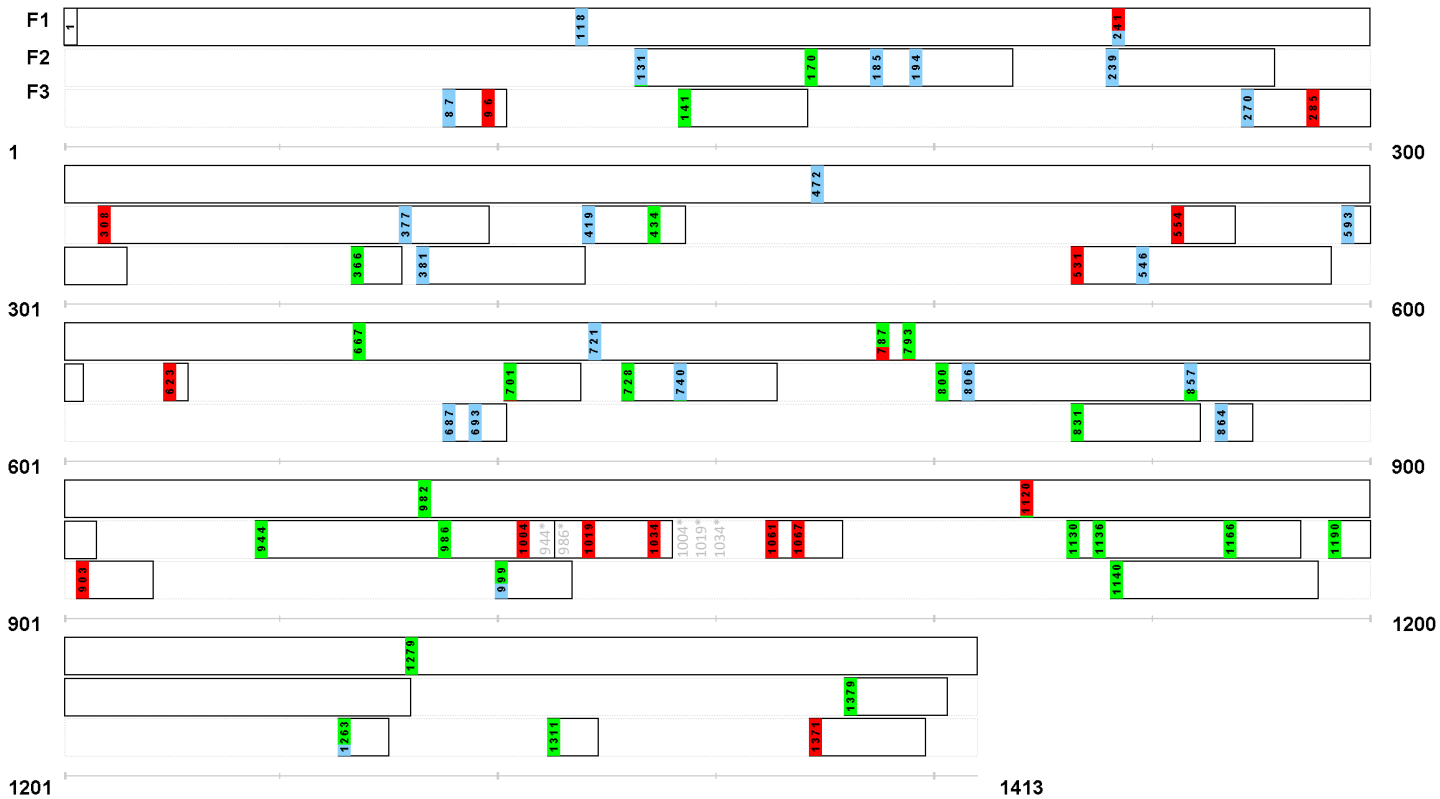

Strong Medium Weak

Figure S30. N4

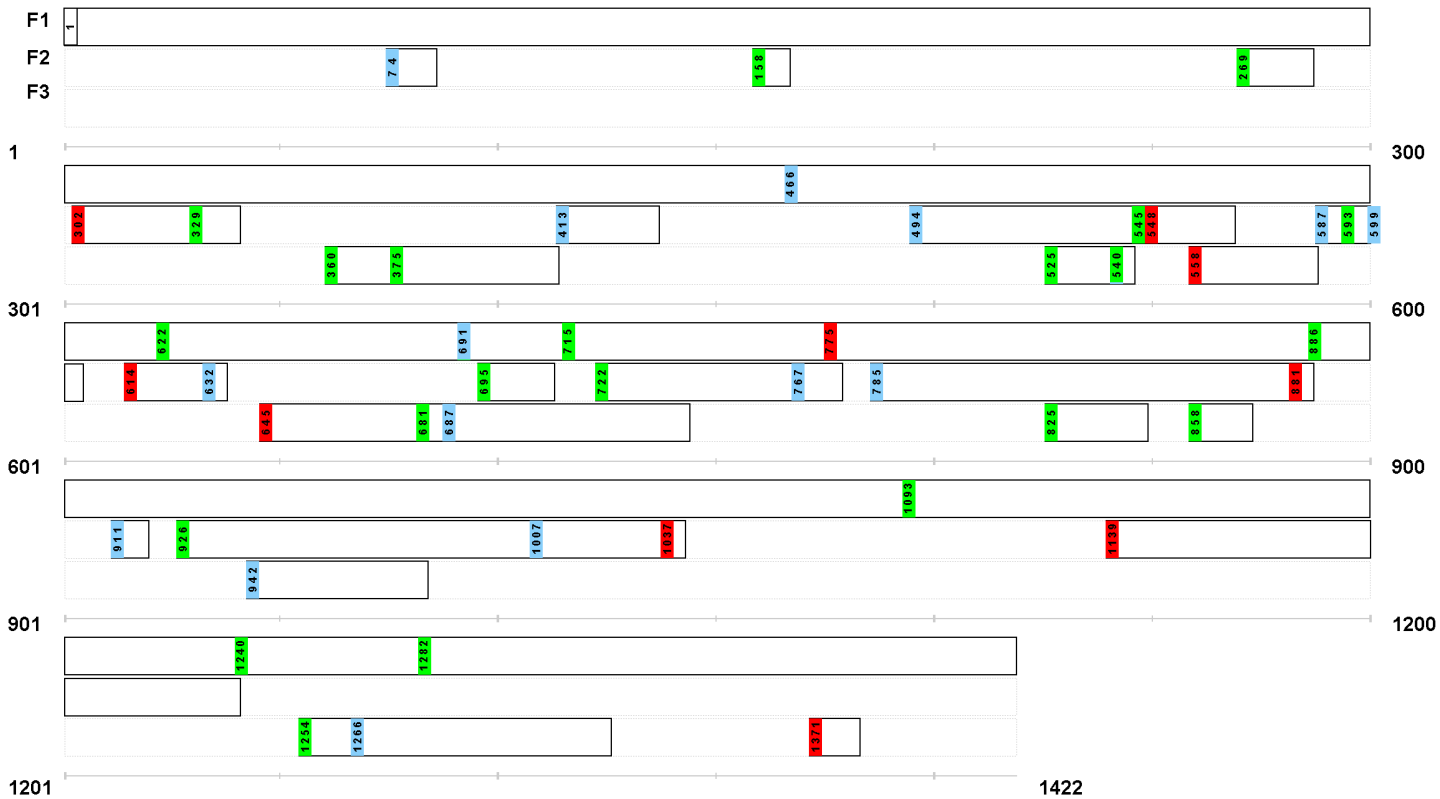

Strong Medium Weak

Figure S31. N5



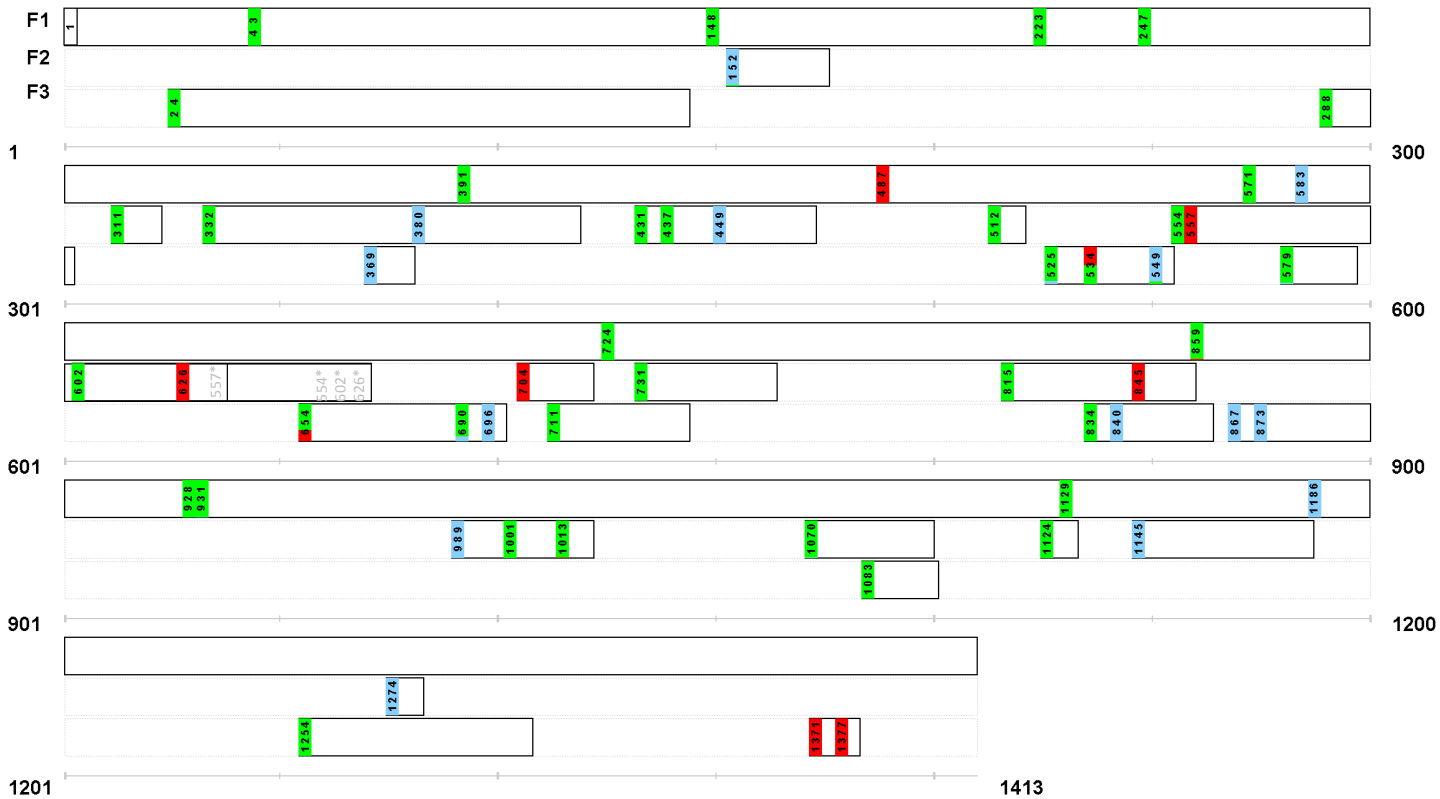

Strong Medium Weak

Figure S32. N6

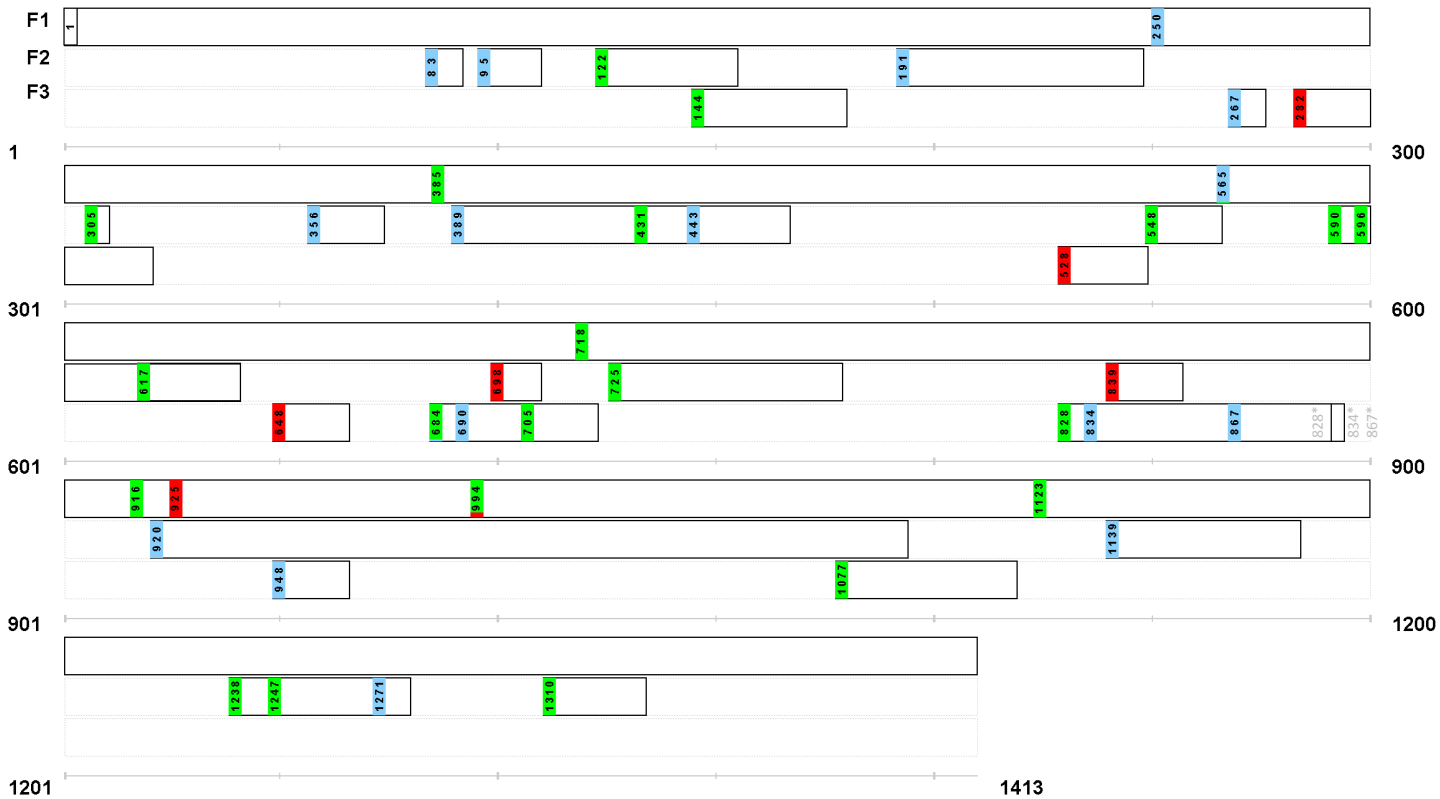

Strong Medium Weak

Figure S33. N7

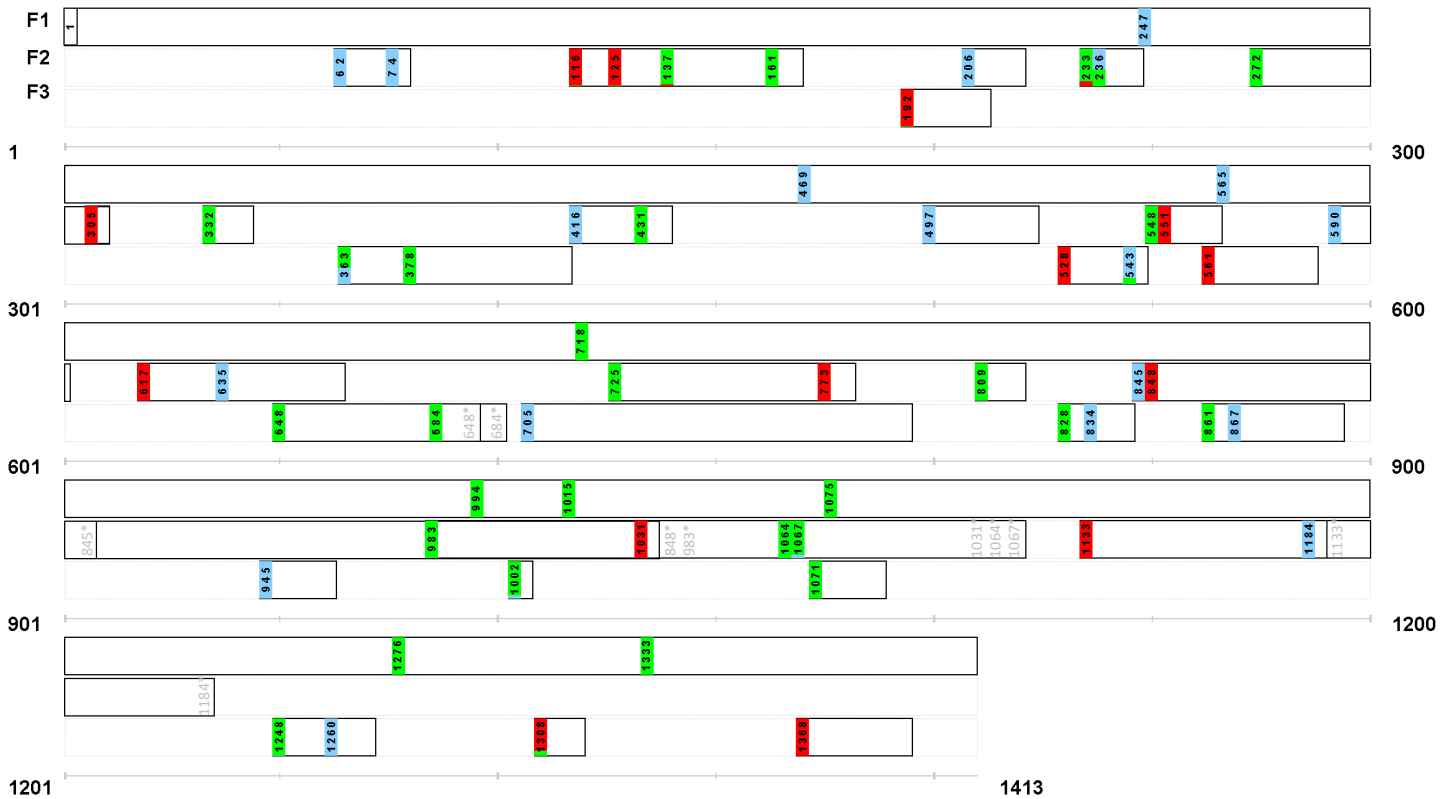

Strong Medium Weak

Figure S34. N8

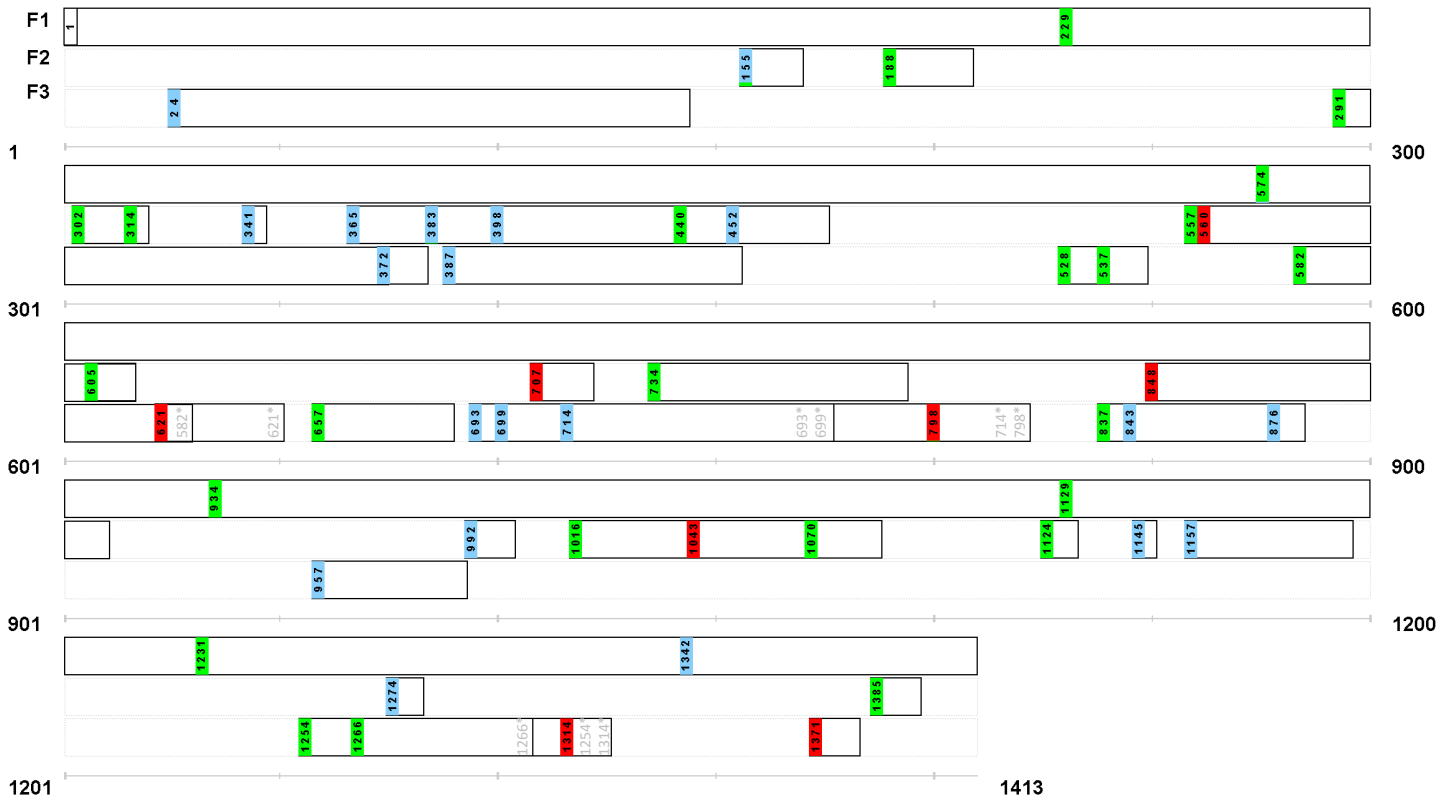

Strong Medium Weak

Figure S35. N9

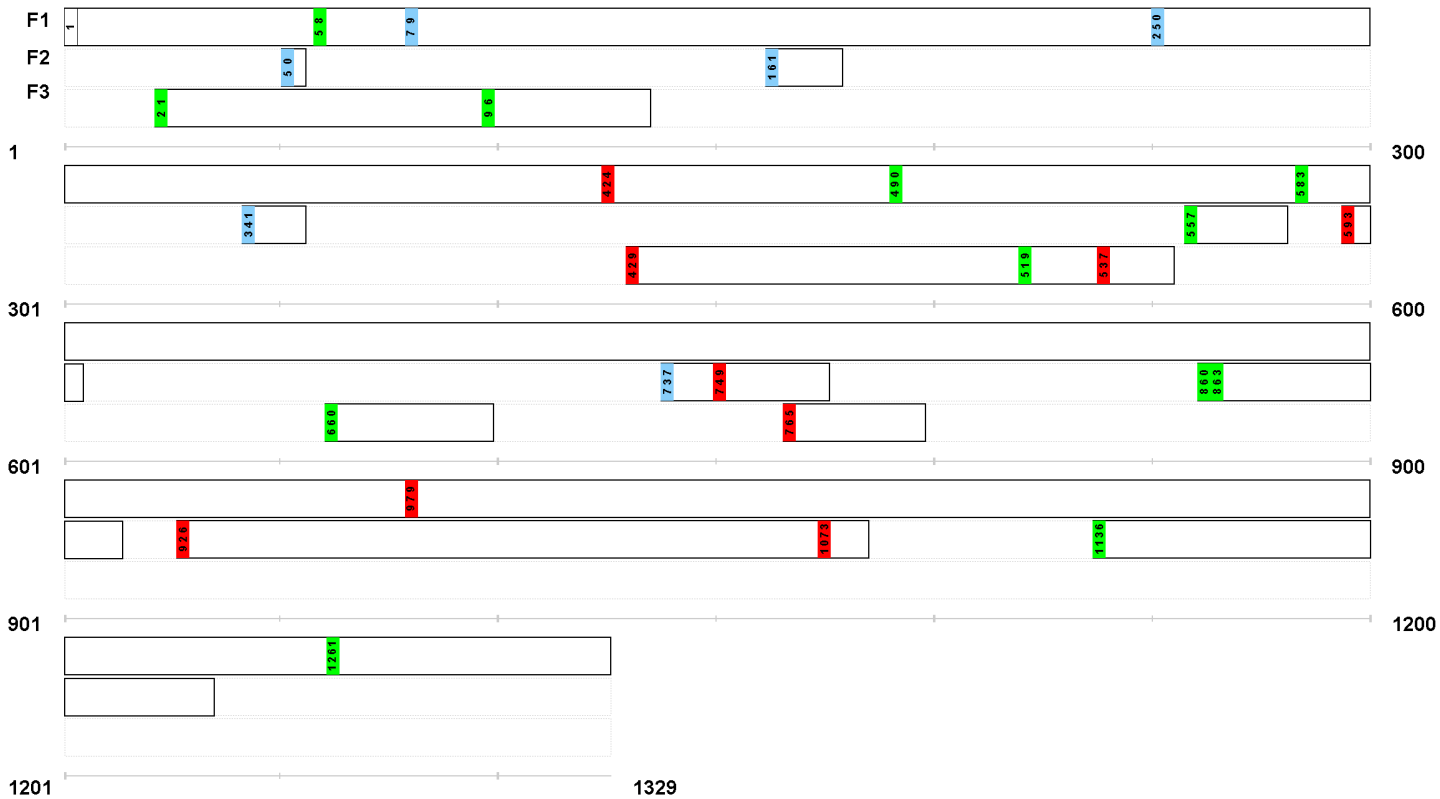

Strong Medium Weak

Figure S36. N10

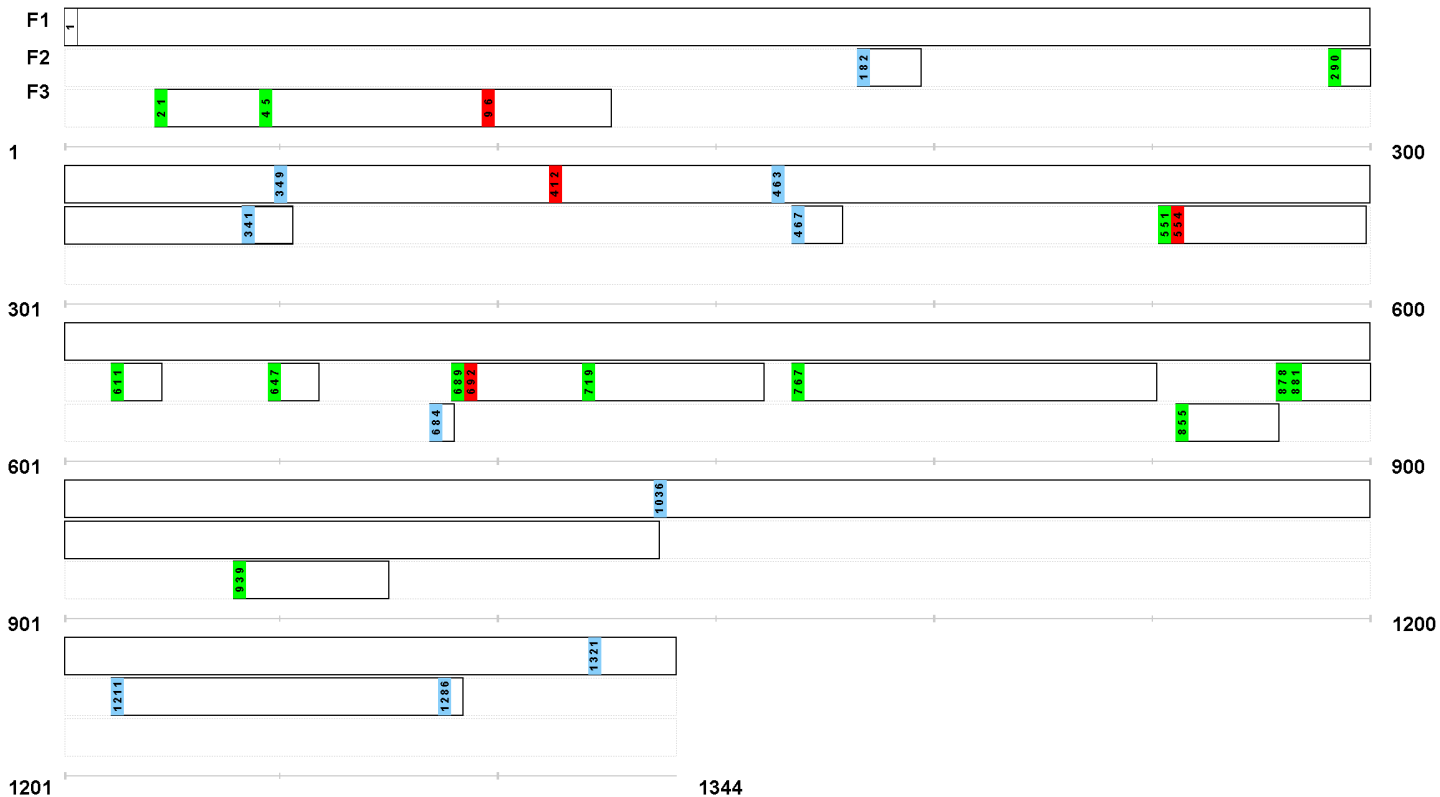

Strong Medium Weak

Figure S37. N11

**Figures S38. Nucleotide alignments for the BLASTP reports.** Four nt sequence alignments are used to illustrate the single nt insertions or deletions (red) that disturbed the reading frames, producing database hits to the ORFs (Table 3). (a) Corresponds to Case 5 in Table 3. Query = JN087010, which translates into AEI29961 in Table 3. Sbjct = HM145493, the second-closest hit in the NT database, excluding the query sequence itself. b) Corresponds to Case 6 in Table 3. Query = AY790308, which translates into AAV68025 in Table 3. Sbjct = AY862651, the second-closest hit in the NT database, excluding the query sequence itself. c) Corresponds to Case 7 in Table 3. Query = M25291, which translates into AAA43224 in Table 3. Sbjct = CY005956, the second-closest hit in the NT database, excluding the query sequence itself. d) Corresponds to Case 8 in Table 3. Query = EU429730, which translates into ACA04672 in Table 3. Sbjct = EU429760, the second-closest hit in the NT database, excluding the query sequence itself.

**(a)**

Query 1681 TGCCATAGGGGTGATACACAAATTCAAACGAGAGAGATCATTCGAGCTGAAGAAGCTGTG 1740  
Sbjct 1681 TGCCATAGGGGTGATACACAAATTCAAACAAG-GAGATCATTCGAGCTGAAGAAGCTGTG 1739

...

Query 1801 TATCCGGAATCTCCACATCCCAGAGGTCTGCTTGAAGTGGGAACTAGATGGATGAAGATT 1860  
Sbjct 1800 TATCCGGAATCTCCACATCCCAGAGGTCTGCTTGAAGTGGGAACTA-ATGGATGAAGATT 1858  
Query 1861 ATCAGGGTAGGCTGTGTAATCCTTCTGAACCCATTTGTCAGTCATAAGGAAATTGAGTCT 1920  
Sbjct 1859 ATCAGGGTAGGCTGTGTAATCCTT-TGAACCCGTTTGTTCAGTCATAAGGAAATTGAGTCT 1917

**(b)**

Query 646 ATTGACGATCGGATTTTCTGGAGAGGTGAAAATGGACCAAAGAACAAGGGATTGCATATG 705  
Sbjct 601 ATTAACGATCGGAATTTCTGGAGAGGTGAAAATGGACGAA-GAACAA-GGATTGCCTATG 658

**(c)**

Query 1260 AAC AAGTAGAGGGAAGGATCCAAGACTTAGAGAAGTATGTTGAAGACAC-AAGATTGACT 1318  
Sbjct 1260 AAC AAGTAGAGGGAAGAATTC AAGACTTAGAGAAGTATGTTGAAGACACA AAGATTGACC 1319

**(d)**

Query 721 TGGGAAC-TGTACAGTAGTAATGACTGATGGAAGTGCATCAGGAAAGGGCTGATACTAG 779  
Sbjct 721 TGG-AAC TTGTACGGTAGTAATGACTGATGG-AAGTGCATCAGGAA-GGGCTGATACTAG 777  
Query 780 AATATTATTCGTTAAAGAGGGGAAAATCGTGCATATCAGCCACTATCAGGGAAGTGCCC 839  
Sbjct 778 AATATTATTCGTTAAAGAGGGGAAAATCGTGCATATCAGCCACTATCA-GGAAGTGCCC 836
